# Supplementary material for: 6mA DNA Methylation on Genes in Plants Is Associated with Gene Complexity, Expression and Duplication
Source: Plants (Basel). 2023 May 10;12(10):1949. doi: 10.3390/plants12101949 (PMC10221889; doi:10.3390/plants12101949)
Supplement: Supplementary file 1 [file plants-12-01949-s001.zip › Supplementary Table S1-S6.xlsx]

## Sheet: Sheet1
Table S1. Genomic Loci and gene expression in the Indian lotus genome.
Gene ID	Chr	Start	End	Strand	FPKM_sample1	FPKM_sample2
INn_00000001	chr1	19179	19988	-	0	0
INn_00000002	chr1	20075	21242	+	0	0
INn_00000004	chr1	48053	48477	+	0	0
INn_00000007	chr1	95270	95695	+	0	0
INn_00000008	chr1	110482	111381	+	0	0.169062
INn_00000009	chr1	153163	154345	-	0	0
INn_00000010	chr1	173472	173897	-	0	0
INn_00000012	chr1	208835	209262	-	0	0
INn_00000013	chr1	245689	246850	-	0	0.047557
INn_00000014	chr1	251198	251276	+	0	0
INn_00000015	chr1	254872	255678	-	0	0
INn_00000016	chr1	255765	256907	+	0	0
INn_00000017	chr1	274048	274127	+	0	0
INn_00000018	chr1	282241	283139	+	0.217061	0.696176
INn_00000019	chr1	284261	284942	+	36.1861	75.5386
INn_00000020	chr1	286012	286884	+	0	0.117201
INn_00000022	chr1	306899	312431	-	0.561978	0.541822
INn_00000025	chr1	427564	427911	-	0	0
INn_00000027	chr1	442281	443376	+	0	0
INn_00000028	chr1	469414	472301	+	0.123352	0.242657
INn_00000029	chr1	478584	481848	-	0	0
INn_00000030	chr1	490407	605967	+	19.2916	17.9867
INn_00000031	chr1	533600	534985	-	0	0
INn_00000032	chr1	609073	611389	-	4.00586	6.06757
INn_00000033	chr1	636923	640583	-	8.82095	7.25228
INn_00000034	chr1	668632	670446	-	0	0.07932
INn_00000036	chr1	757560	767883	+	11.0735	8.23571
INn_00000037	chr1	785254	787277	-	0.132499	0.085469
INn_00000038	chr1	789030	790653	+	0	0
INn_00000039	chr1	802000	804017	+	0.171608	0.262959
INn_00000040	chr1	837430	856260	-	11.1255	9.479
INn_00000041	chr1	857738	858085	-	3.84079	1.86135
INn_00000043	chr1	888623	898165	+	29.8075	28.0525
INn_00000044	chr1	924817	926406	+	2.04303	2.3414
INn_00000045	chr1	930948	931439	-	2.96521	1.71309
INn_00000046	chr1	949462	955198	-	106.896	98.2918
INn_00000048	chr1	1040841	1041270	+	6.08882	7.80938
INn_00000049	chr1	1040863	1041147	-	18.8238	23.6742
INn_00000050	chr1	1048795	1050065	-	3.91329	5.71837
INn_00000052	chr1	1100786	1104743	+	3.76565	2.89574
INn_00000053	chr1	1127689	1129784	+	0.664486	1.18279
INn_00000054	chr1	1156945	1158528	+	2.03121	1.20955
INn_00000055	chr1	1165968	1169287	-	5.76001	4.217
INn_00000056	chr1	1184398	1185587	-	0.196813	0.072685
INn_00000057	chr1	1195003	1227748	+	1.87456	1.48038
INn_00000058	chr1	1237905	1238104	-	0.685639	0.324835
INn_00000059	chr1	1254636	1266008	-	29.8837	30.3458
INn_00000060	chr1	1276815	1277977	-	0	0
INn_00000061	chr1	1298102	1326857	+	9.70838	6.16456
INn_00000062	chr1	1329037	1330115	+	0.242246	0.259012
INn_00000063	chr1	1344192	1363127	-	44.2674	55.7821
INn_00000066	chr1	1447071	1447370	-	0	0
INn_00000069	chr1	1474213	1475225	+	0	0
INn_00000070	chr1	1510768	1511088	-	0	0
INn_00000072	chr1	1548423	1549040	+	0.298589	0
INn_00000074	chr1	1593542	1597665	-	1.29378	1.27245
INn_00000075	chr1	1598747	1662292	+	13.4831	8.58511
INn_00000076	chr1	1670141	1670474	+	0	0
INn_00000077	chr1	1692665	1694457	+	8.08459	7.87526
INn_00000078	chr1	1720396	1723424	+	0	0
INn_00000079	chr1	1720513	1721152	-	0	0
INn_00000080	chr1	1735374	1738627	+	0.464399	0
INn_00000081	chr1	1747160	1747447	-	0	0
INn_00000082	chr1	1755788	1759651	+	13.1622	12.3397
INn_00000083	chr1	1782911	1805225	-	10.0054	9.38109
INn_00000084	chr1	1826460	1833281	+	14.1282	18.7323
INn_00000085	chr1	1847009	1851286	+	46.4003	35.9034
INn_00000087	chr1	1884029	1887525	-	5.56339	3.19633
INn_00000088	chr1	1921535	1922186	-	0	0
INn_00000089	chr1	1927695	1928471	+	0	0
INn_00000090	chr1	1940252	1957303	+	0.800717	0.474647
INn_00000091	chr1	1961592	1964367	+	0	0
INn_00000092	chr1	1963607	1965801	-	0	0
INn_00000095	chr1	2001685	2003056	-	0	0
INn_00000096	chr1	2011590	2015584	+	116.771	160.902
INn_00000097	chr1	2028460	2029050	-	3.57206	5.86745
INn_00000098	chr1	2031668	2035003	-	48.7185	52.4445
INn_00000099	chr1	2050392	2052395	+	0.25417	0.172548
INn_00000101	chr1	2066223	2069892	-	9.82042	7.96886
INn_00000102	chr1	2095522	2111523	-	31.5617	31.7392
INn_00000104	chr1	2109049	2109593	+	0.082667	0.090286
INn_00000106	chr1	2124295	2161997	+	11.5416	11.8563
INn_00000107	chr1	2167513	2173474	-	12.2757	10.031
INn_00000108	chr1	2181194	2183297	-	8.10126	8.28472
INn_00000109	chr1	2240053	2262777	+	68.2489	58.7045
INn_00000110	chr1	2251183	2252545	-	0	0
INn_00000111	chr1	2266126	2296732	-	33.4385	36.0931
INn_00000112	chr1	2298916	2300289	-	0	0
INn_00000113	chr1	2301200	2304278	-	1.23525	0.690933
INn_00000114	chr1	2310551	2316714	+	1.4927	1.40842
INn_00000115	chr1	2353718	2355222	+	1.78978	0.624541
INn_00000116	chr1	2359825	2371910	+	5.19072	4.88921
INn_00000117	chr1	2378778	2382172	+	16.505	18.2212
INn_00000118	chr1	2383247	2391628	-	2.43719	2.02318
INn_00000119	chr1	2384019	2385487	+	0	0
INn_00000120	chr1	2418338	2535589	-	6.03432	14.0374
INn_00000121	chr1	2546963	2547550	-	31.574	14.5753
INn_00000123	chr1	2586403	2586706	-	0	0.474203
INn_00000124	chr1	2587706	2588389	-	0	0.084303
INn_00000125	chr1	2595615	2596049	-	3.7927	2.23848
INn_00000127	chr1	2605793	2609234	-	0.199332	0.79984
INn_00000128	chr1	2606459	2606682	+	0.160317	0.227392
INn_00000129	chr1	2607749	2608243	-	0	1.30354
INn_00000130	chr1	2624412	2627024	-	19.5608	22.5018
INn_00000131	chr1	2664636	2665208	+	26.1472	34.0195
INn_00000132	chr1	2721709	2723106	-	0	0
INn_00000133	chr1	2735785	2736712	+	0	0
INn_00000134	chr1	2747851	2749131	-	0	0
INn_00000137	chr1	2834505	2834925	-	0	0
INn_00000138	chr1	2857533	2861096	+	60.0448	56.3828
INn_00000139	chr1	2871351	2872947	-	9.68588	6.79141
INn_00000141	chr1	2910367	2912025	-	8.5005	13.8446
INn_00000142	chr1	2910901	2911146	-	0.880841	1.94085
INn_00000143	chr1	2918022	2921317	+	32.1209	30.3261
INn_00000144	chr1	2945100	2952486	+	61.5956	55.4291
INn_00000145	chr1	2975901	2977308	+	29.0376	22.0255
INn_00000146	chr1	2978779	2979120	-	0.078414	0.046085
INn_00000147	chr1	2988818	2989150	+	0	0
INn_00000148	chr1	2993644	3008109	-	107.136	81.1472
INn_00000149	chr1	3026484	3026816	+	0	0
INn_00000151	chr1	3031813	3032703	-	0.298376	0.194152
INn_00000152	chr1	3048768	3052234	+	16.3261	14.789
INn_00000153	chr1	3055670	3073914	-	10.0426	12.7913
INn_00000154	chr1	3067560	3068909	+	0.297842	0.339572
INn_00000155	chr1	3082896	3086543	-	11.1942	13.0137
INn_00000156	chr1	3093266	3104939	-	2.56418	1.22943
INn_00000157	chr1	3117430	3118584	+	0	0
INn_00000158	chr1	3123384	3195095	-	9.07313	6.67087
INn_00000159	chr1	3156950	3158875	-	0.016761	0
INn_00000160	chr1	3195540	3212430	+	8.09499	8.92197
INn_00000161	chr1	3219909	3226472	+	9.5488	8.96506
INn_00000162	chr1	3241944	3242615	-	0.144926	0
INn_00000163	chr1	3260530	3263132	-	1.0817	1.30641
INn_00000164	chr1	3270145	3270408	+	0	0
INn_00000166	chr1	3292837	3297470	-	3.02814	2.71673
INn_00000167	chr1	3300671	3301865	-	2.64826	0.868404
INn_00000168	chr1	3310827	3310952	+	0	0
INn_00000169	chr1	3310992	3311225	-	0	0
INn_00000170	chr1	3315326	3315643	-	0	0
INn_00000171	chr1	3337503	3340059	-	10.0991	9.573
INn_00000172	chr1	3344869	3345265	-	0	0.293883
INn_00000173	chr1	3346354	3350208	+	0.025284	0.036243
INn_00000174	chr1	3350864	3351311	+	0	0
INn_00000175	chr1	3355038	3356748	+	7.39589	7.28703
INn_00000176	chr1	3380016	3386522	+	0.015255	0
INn_00000178	chr1	3386212	3386570	-	0	0
INn_00000179	chr1	3387388	3388258	-	1.16082	5.50481
INn_00000180	chr1	3406911	3407180	-	0	0
INn_00000183	chr1	3463180	3477009	-	5.02163	5.36767
INn_00000184	chr1	3471293	3471970	+	0	0.537249
INn_00000185	chr1	3500981	3503289	-	3.62914	6.44256
INn_00000186	chr1	3541514	3557505	+	35.6971	39.2749
INn_00000187	chr1	3561154	3561546	-	0	0
INn_00000188	chr1	3568225	3571126	+	5.54388	6.81163
INn_00000189	chr1	3580415	3580807	+	12.2035	15.8596
INn_00000190	chr1	3580941	3609930	+	5.87061	9.44263
INn_00000191	chr1	3614348	3616769	+	5.89003	6.65998
INn_00000192	chr1	3618849	3620626	-	1.10679	1.2218
INn_00000193	chr1	3641458	3642700	-	0.0435	0
INn_00000194	chr1	3660081	3662287	-	143.808	119.774
INn_00000196	chr1	3663165	3664956	-	0.288712	0.083028
INn_00000197	chr1	3711377	3717236	-	6.89948	6.30424
INn_00000198	chr1	3729278	3750379	+	7.82085	7.02911
INn_00000199	chr1	3757934	3758725	-	3.59037	1.82358
INn_00000200	chr1	3780772	3782364	+	1.15524	1.42346
INn_00000202	chr1	3813030	3813335	-	0	0
INn_00000203	chr1	3820050	3821294	+	0.371499	0.611985
INn_00000204	chr1	3833226	3834994	-	0.606089	0.586627
INn_00000205	chr1	3835515	3838781	+	2.18536	1.70559
INn_00000206	chr1	3847816	3852126	+	1.80332	2.51459
INn_00000207	chr1	3870135	3872576	+	4.8941	3.96007
INn_00000208	chr1	3874602	3874934	-	0	0
INn_00000209	chr1	3878885	3885227	-	30.7142	34.1068
INn_00000210	chr1	3887592	3901955	-	13.7874	10.4598
INn_00000212	chr1	3918425	3924604	-	45.1307	28.0774
INn_00000214	chr1	3932553	3935669	+	3.68303	3.95691
INn_00000215	chr1	3933589	3934400	-	14.5918	13.2284
INn_00000216	chr1	3942117	3942578	+	0	0
INn_00000217	chr1	3962992	3963363	+	35.4094	20.5784
INn_00000219	chr1	3988789	3989835	-	0.201378	0.123231
INn_00000220	chr1	4029661	4032272	-	4.06908	3.48649
INn_00000223	chr1	4046242	4046442	-	0	0
INn_00000225	chr1	4063156	4069631	+	21.9607	10.6751
INn_00000226	chr1	4078074	4081654	+	1.49283	1.09595
INn_00000227	chr1	4082013	4088282	-	9.81401	10.2824
INn_00000228	chr1	4105820	4107872	-	0.137299	0.219509
INn_00000229	chr1	4109941	4110987	+	94.3797	101.937
INn_00000231	chr1	4126326	4129220	-	1.83418	2.20854
INn_00000232	chr1	4137685	4139254	-	19.9761	15.0709
INn_00000233	chr1	4139980	4142815	+	64.6621	102.888
INn_00000234	chr1	4162548	4164005	-	7.83783	6.33938
INn_00000235	chr1	4179166	4247356	-	2.14673	2.26659
INn_00000238	chr1	4306068	4310957	+	4.45025	5.43775
INn_00000239	chr1	4330281	4331983	+	201.225	205.489
INn_00000240	chr1	4334284	4335126	-	13.5804	23.5162
INn_00000242	chr1	4339658	4419980	-	52.808	44.9753
INn_00000244	chr1	4463899	4465160	+	16.0057	29.0854
INn_00000245	chr1	4478986	4480182	-	0.448082	0.433396
INn_00000246	chr1	4491321	4497009	-	18.5893	21.9443
INn_00000247	chr1	4535959	4536351	+	0.1201	1.20511
INn_00000248	chr1	4550659	4550994	-	11.952	9.19291
INn_00000249	chr1	4554923	4556880	+	3.09513	2.50718
INn_00000250	chr1	4561298	4563458	-	0.575434	0.459757
INn_00000251	chr1	4565932	4566608	-	0	0
INn_00000252	chr1	4567889	4568100	-	0	0
INn_00000256	chr1	4604517	4604835	+	0	0.043985
INn_00000257	chr1	4616354	4616746	-	0	0
INn_00000258	chr1	4646690	4648063	+	0	0
INn_00000259	chr1	4659315	4661366	+	1.07807	1.35796
INn_00000261	chr1	4747598	4748831	+	0	0
INn_00000262	chr1	4748413	4748635	-	0	0
INn_00000263	chr1	4764980	4768282	-	0.605475	1.31312
INn_00000264	chr1	4766170	4766570	+	0	0
INn_00000265	chr1	4766897	4768108	+	0	0
INn_00000266	chr1	4770943	4771815	+	0.727631	0.244391
INn_00000267	chr1	4802191	4804548	+	0.021878	0.130177
INn_00000268	chr1	4822558	4822902	+	12.5616	14.4709
INn_00000269	chr1	4852486	4868660	-	5.89565	6.81394
INn_00000270	chr1	4866317	4867595	+	0.178365	0.089718
INn_00000272	chr1	4906071	4906500	+	19.1294	9.93785
INn_00000273	chr1	4914559	4917270	+	7.52451	7.06713
INn_00000274	chr1	4988020	4992985	+	0	0
INn_00000275	chr1	4988392	4992387	-	0	0
INn_00000277	chr1	5001196	5002749	+	6.98169	5.38894
INn_00000278	chr1	5008046	5017166	+	9.86245	8.99927
INn_00000280	chr1	5027933	5029035	-	3.3153	2.40038
INn_00000281	chr1	5029307	5029773	-	2.70304	1.66953
INn_00000282	chr1	5035138	5036404	+	3.95429	3.63728
INn_00000283	chr1	5051162	5051620	+	0	0
INn_00000284	chr1	5056044	5069904	+	3.39422	3.85764
INn_00000285	chr1	5078443	5079175	+	1.66004	0.904149
INn_00000286	chr1	5079749	5080306	+	4.97521	2.98167
INn_00000289	chr1	5124032	5128051	-	34.0243	28.7877
INn_00000290	chr1	5164159	5165865	+	169.987	184.302
INn_00000292	chr1	5210404	5211396	+	3.96189	8.05715
INn_00000293	chr1	5214078	5218828	-	0.957921	2.89145
INn_00000296	chr1	5256175	5259019	+	17.4226	12.0026
INn_00000297	chr1	5264077	5266737	-	30.689	35.858
INn_00000300	chr1	5326096	5326735	+	0	0
INn_00000301	chr1	5328913	5331299	-	0	0
INn_00000302	chr1	5342228	5345316	-	0.291282	0.269617
INn_00000303	chr1	5344733	5345388	+	0.510609	0
INn_00000304	chr1	5359206	5361370	+	0	0
INn_00000305	chr1	5361915	5362505	-	0.147928	1.05862
INn_00000306	chr1	5370559	5374632	+	0	0.236782
INn_00000307	chr1	5399094	5402219	+	0.558709	1.49894
INn_00000308	chr1	5404223	5434460	-	51.2742	45.1859
INn_00000309	chr1	5472433	5473992	-	0.742807	0.792105
INn_00000310	chr1	5480918	5481349	+	0	0
INn_00000311	chr1	5481819	5481988	+	0	0
INn_00000312	chr1	5485427	5524190	-	17.6415	16.6956
INn_00000315	chr1	5552219	5556728	-	0.032546	0.075655
INn_00000316	chr1	5560239	5561870	+	0	0
INn_00000317	chr1	5571341	5572374	+	0.022757	0
INn_00000318	chr1	5588484	5589046	-	0.046681	0
INn_00000319	chr1	5592659	5592978	-	59.7627	90.0163
INn_00000320	chr1	5597224	5597496	+	1.668	2.9078
INn_00000321	chr1	5610580	5610876	+	0.530936	0.097076
INn_00000322	chr1	5635582	5638977	-	30.4774	35.5045
INn_00000323	chr1	5640840	5642426	+	0.595611	0.399439
INn_00000324	chr1	5641547	5641958	-	0	0
INn_00000325	chr1	5647780	5650165	+	7.18997	5.67576
INn_00000326	chr1	5662165	5662905	-	6.24443	6.89456
INn_00000327	chr1	5673924	5674830	-	0	0
INn_00000328	chr1	5695326	5700288	+	6.41436	5.43649
INn_00000329	chr1	5701861	5702435	-	0.562783	0.842717
INn_00000330	chr1	5706245	5706529	+	0	0
INn_00000331	chr1	5706916	5711835	+	0	0
INn_00000332	chr1	5716919	5717578	-	715.4	590.587
INn_00000334	chr1	5733706	5734291	-	0.530862	2.85659
INn_00000335	chr1	5738384	5740528	+	0.004167	0.031363
INn_00000336	chr1	5778821	5780789	-	5.03347	2.76284
INn_00000338	chr1	5880524	5882152	-	4.38163	2.99754
INn_00000339	chr1	5921595	5923005	+	546.646	840.991
INn_00000343	chr1	6005909	6064239	+	1.66934	5.2973
INn_00000345	chr1	6091307	6092026	-	0	0
INn_00000347	chr1	6125163	6125688	-	0.067299	0
INn_00000348	chr1	6131361	6162311	-	9.75397	9.4392
INn_00000350	chr1	6226625	6227899	-	0.084134	0.045226
INn_00000352	chr1	6291757	6292188	-	0.139055	0.083202
INn_00000353	chr1	6294801	6296230	+	1.53558	1.22706
INn_00000354	chr1	6304388	6305070	+	0.964396	1.46904
INn_00000355	chr1	6321210	6322694	-	9.21866	7.85603
INn_00000358	chr1	6399263	6425700	-	0.733636	0.714795
INn_00000359	chr1	6462092	6462658	+	0	0
INn_00000360	chr1	6464275	6464658	-	0.606192	1.52967
INn_00000361	chr1	6474006	6495018	-	24.2249	25.4821
INn_00000362	chr1	6525532	6526412	+	0	0
INn_00000363	chr1	6587935	6599524	+	0.415407	0.153506
INn_00000364	chr1	6632739	6666491	+	38.1228	36.6118
INn_00000365	chr1	6688200	6692520	-	56.4685	50.2926
INn_00000366	chr1	6725924	6726896	+	3.22649	3.01577
INn_00000367	chr1	6727327	6729606	+	3.97411	4.07904
INn_00000368	chr1	6741858	6742485	+	2.58925	1.05624
INn_00000369	chr1	6749853	6750718	+	0	0
INn_00000370	chr1	6751814	6753056	-	15.0527	15.2485
INn_00000371	chr1	6773505	6774134	+	0.532097	0.118987
INn_00000372	chr1	6780688	6800351	-	13.0066	9.87034
INn_00000373	chr1	6801401	6803705	+	0	0
INn_00000374	chr1	6812973	6814236	-	10.2977	9.79482
INn_00000378	chr1	6855868	6857008	-	0.216391	0.34736
INn_00000379	chr1	6857921	6858362	-	0	0.442907
INn_00000380	chr1	6874890	6875255	+	0	0
INn_00000382	chr1	6903490	6984904	-	28.2584	27.6371
INn_00000383	chr1	6985612	6985902	+	2.70389	3.23851
INn_00000384	chr1	7000828	7001780	-	0	0
INn_00000385	chr1	7003095	7060901	-	45.2481	44.4847
INn_00000386	chr1	7069613	7191796	+	10.7149	11.289
INn_00000388	chr1	7136927	7138004	+	0	0
INn_00000389	chr1	7152843	7153920	+	0	0
INn_00000390	chr1	7209767	7210192	-	0	0
INn_00000391	chr1	7232638	7233401	-	0	0
INn_00000393	chr1	7304448	7306565	+	25.4218	8.08009
INn_00000395	chr1	7523950	7524466	-	0	0
INn_00000397	chr1	7667990	7668199	+	0.199388	0
INn_00000401	chr1	7810323	7812191	-	0.028697	0.212984
INn_00000402	chr1	7872407	7872846	-	0	0
INn_00000403	chr1	7887992	7889427	-	0.091486	0
INn_00000404	chr1	7896257	7896949	-	1.10341	1.37903
INn_00000405	chr1	7908939	7916154	+	44.417	33.3301
INn_00000406	chr1	7922642	7923967	+	0	0
INn_00000407	chr1	7945773	7946612	+	0	0
INn_00000408	chr1	7960882	7963051	-	0	0
INn_00000409	chr1	7975380	7975835	+	0.058811	0
INn_00000412	chr1	8039227	8040454	+	0	0
INn_00000413	chr1	8057349	8059056	-	10.2506	7.59723
INn_00000414	chr1	8102850	8103845	-	0	0
INn_00000415	chr1	8110277	8133567	+	8.18613	5.84248
INn_00000416	chr1	8150936	8152699	+	17.8396	19.9557
INn_00000417	chr1	8191713	8193591	-	8.0826	9.77604
INn_00000418	chr1	8209233	8209583	-	0	0
INn_00000419	chr1	8224545	8226604	+	154.871	62.1033
INn_00000420	chr1	8269453	8271993	-	2.03007	4.56463
INn_00000422	chr1	8295278	8297539	-	0	0
INn_00000423	chr1	8366187	8366646	-	0	0.129834
INn_00000425	chr1	8431046	8431370	-	0	0
INn_00000426	chr1	8461472	8465790	+	10.6262	10.9664
INn_00000428	chr1	8478646	8479527	+	0	0
INn_00000429	chr1	8485262	8491611	-	1.13551	1.32206
INn_00000430	chr1	8510605	8514375	-	37.2342	48.369
INn_00000432	chr1	8554039	8617169	+	5.61416	4.91571
INn_00000434	chr1	8654737	8657912	+	44.5044	26.6326
INn_00000437	chr1	8724225	8725334	-	11.1747	14.3262
INn_00000438	chr1	8731063	8731263	-	0.455412	0.563243
INn_00000439	chr1	8731882	8732487	+	1.71557	0.742515
INn_00000440	chr1	8741526	8741867	+	4.56842	5.22115
INn_00000441	chr1	8765104	8766510	+	0	0
INn_00000442	chr1	8766945	8771200	+	0	0.013868
INn_00000443	chr1	8782371	8783626	+	4.9424	7.73468
INn_00000445	chr1	8841152	8841467	-	0	0
INn_00000446	chr1	8865678	8866778	+	0.180499	0.649081
INn_00000448	chr1	9032077	9032715	+	13.7874	11.535
INn_00000449	chr1	9066516	9066881	-	0	0
INn_00000450	chr1	9082176	9092064	+	0	0
INn_00000451	chr1	9115781	9116155	+	0.375209	0.427988
INn_00000452	chr1	9119440	9145951	-	45.4132	46.6161
INn_00000453	chr1	9132395	9144169	-	0	0.027145
INn_00000454	chr1	9188121	9189321	-	34.1207	86.9207
INn_00000455	chr1	9234491	9235713	+	0.042322	0.259419
INn_00000457	chr1	9252908	9253121	+	0	0
INn_00000458	chr1	9260030	9269063	+	14.5091	12.1642
INn_00000459	chr1	9289206	9384109	+	7.1159	7.54305
INn_00000462	chr1	9384215	9384456	-	0	0
INn_00000466	chr1	9432989	9437473	+	6.257	3.99672
INn_00000467	chr1	9439407	9446563	-	30.5	27.2552
INn_00000468	chr1	9503538	9505440	+	0.084554	0
INn_00000472	chr1	9540215	9543157	+	34.9819	26.0978
INn_00000473	chr1	9549720	9550073	+	0	0
INn_00000474	chr1	9554259	9555521	-	0.297267	0.136967
INn_00000476	chr1	9564177	9565818	-	0	0
INn_00000477	chr1	9585976	9589370	+	9.15709	8.14181
INn_00000479	chr1	9604050	9606247	+	0.097608	0
INn_00000480	chr1	9607895	9609274	-	1.37341	1.5908
INn_00000481	chr1	9618735	9619725	+	87.2544	72.4038
INn_00000482	chr1	9623751	9657239	-	2.64716	2.67316
INn_00000483	chr1	9670702	9671349	-	1.16679	3.21834
INn_00000484	chr1	9692676	9693372	+	0	0
INn_00000485	chr1	9709943	9712137	-	0	0
INn_00000486	chr1	9743607	9744656	-	0	0
INn_00000487	chr1	9760030	9762793	-	10.6054	7.8129
INn_00000488	chr1	9789179	9870150	+	4.94663	4.14404
INn_00000492	chr1	9928043	9928378	-	0	0
INn_00000493	chr1	9986497	10011111	-	6.02616	6.39258
INn_00000494	chr1	10008058	10008829	-	0.072439	0
INn_00000495	chr1	10056580	10056951	-	0	0
INn_00000496	chr1	10082987	10090154	+	31.8767	40.1549
INn_00000497	chr1	10091628	10115868	-	7.91935	7.44408
INn_00000499	chr1	10176912	10186216	-	8.45686	5.30672
INn_00000500	chr1	10187096	10187491	-	0.701594	1.91579
INn_00000501	chr1	10190481	10191160	+	0.217792	0.650016
INn_00000502	chr1	10191897	10192644	+	0	0.308359
INn_00000503	chr1	10202875	10207834	+	10.6214	8.46262
INn_00000504	chr1	10208690	10209106	-	0.314695	0.330952
INn_00000505	chr1	10225913	10231397	-	3.14631	3.16549
INn_00000506	chr1	10247113	10247751	+	0	0
INn_00000507	chr1	10260379	10260540	-	0.754868	0.512561
INn_00000508	chr1	10262615	10263361	+	0.143363	0.32136
INn_00000509	chr1	10272219	10273622	+	0	0.041071
INn_00000511	chr1	10309480	10310202	-	37.5866	13.4659
INn_00000512	chr1	10377499	10378662	+	0	0
INn_00000514	chr1	10406039	10406419	-	13.5416	6.58459
INn_00000515	chr1	10426906	10427096	+	0	0
INn_00000516	chr1	10431437	10431754	+	0	0
INn_00000517	chr1	10433890	10434486	+	0.870968	0.725179
INn_00000518	chr1	10459658	10509970	+	10.8072	9.6513
INn_00000519	chr1	10512195	10529220	+	38.7971	30.6009
INn_00000520	chr1	10529171	10529418	-	12.7016	11.5094
INn_00000521	chr1	10530220	10582238	-	19.4053	17.4986
INn_00000522	chr1	10605725	10606102	-	0	0
INn_00000524	chr1	10636431	10636833	-	0	0
INn_00000525	chr1	10642644	10643019	-	0	0
INn_00000526	chr1	10653061	10653530	-	0.161067	0
INn_00000527	chr1	10673566	10675706	-	0.049525	0.265687
INn_00000528	chr1	10693251	10693684	+	0.990224	1.46086
INn_00000529	chr1	10693824	10700951	+	11.5274	11.0465
INn_00000530	chr1	10705327	10705545	+	0	0
INn_00000532	chr1	10723563	10749424	+	2.17179	2.24808
INn_00000533	chr1	10770296	10773083	-	23.0238	24.6801
INn_00000534	chr1	10788242	10789836	+	0	0
INn_00000535	chr1	10788366	10790602	-	0	0
INn_00000537	chr1	10793126	10795635	-	0.032519	0.023308
INn_00000539	chr1	10796470	10796783	-	0.085407	0
INn_00000540	chr1	10797074	10797379	-	0	0
INn_00000541	chr1	10797621	10798152	-	0	0
INn_00000542	chr1	10798557	10799099	-	0.603522	0.417765
INn_00000545	chr1	10800525	10800822	+	0.102211	0.064919
INn_00000547	chr1	10802538	10803196	-	0	0
INn_00000548	chr1	10819170	10819441	-	0.996103	0.518685
INn_00000549	chr1	10819873	10820107	+	0.114118	0
INn_00000550	chr1	10837847	10840735	-	3.86269	4.16987
INn_00000551	chr1	10854433	10855383	+	34.5615	25.7184
INn_00000552	chr1	10890702	10891475	-	0	0.0745
INn_00000553	chr1	10920899	10924577	-	2.40985	2.42173
INn_00000554	chr1	10929002	10929382	+	0	0.026233
INn_00000555	chr1	10932814	10933099	+	1.02582	0.444906
INn_00000556	chr1	10933824	10936692	+	15.0462	15.4606
INn_00000558	chr1	10957878	10960321	+	0.708847	0.990465
INn_00000559	chr1	10959317	10960241	-	0	0
INn_00000560	chr1	10969725	10970167	+	0	0
INn_00000561	chr1	10978413	10980705	-	0.523249	0.404715
INn_00000562	chr1	10989075	10989975	-	0	0
INn_00000563	chr1	10990061	10990420	-	0	0
INn_00000564	chr1	11013368	11013994	+	0.112061	0.412624
INn_00000565	chr1	11018857	11019731	-	2.97348	4.36
INn_00000566	chr1	11043006	11045129	+	61.7298	47.8525
INn_00000567	chr1	11065583	11069792	-	3.67726	2.24997
INn_00000570	chr1	11127291	11129030	+	32.4145	22.6335
INn_00000571	chr1	11162804	11164536	+	651.091	890.828
INn_00000573	chr1	11191852	11192106	-	22.1679	17.1369
INn_00000574	chr1	11204730	11213484	-	18.2573	14.5563
INn_00000575	chr1	11213512	11214168	-	2.29084	2.86129
INn_00000576	chr1	11250765	11255857	+	8.92796	1.4815
INn_00000577	chr1	11256470	11275638	-	51.0463	43.6241
INn_00000578	chr1	11283751	11284559	-	0	0
INn_00000579	chr1	11339481	11340451	+	27.4122	27.6366
INn_00000580	chr1	11359055	11364845	+	33.543	28.2568
INn_00000581	chr1	11371925	11372830	-	5.09181	16.8048
INn_00000582	chr1	11383892	11391201	+	0.5568	0.804023
INn_00000583	chr1	11406212	11410687	+	0	0
INn_00000584	chr1	11425215	11427441	-	0.200015	0.477375
INn_00000585	chr1	11448081	11456029	-	1.51633	1.4776
INn_00000586	chr1	11469745	11481489	-	37.9539	46.2706
INn_00000587	chr1	11479023	11480576	+	0.03463	0.074089
INn_00000588	chr1	11499699	11508378	-	0.739336	1.03519
INn_00000590	chr1	11513908	11514345	-	0	0
INn_00000591	chr1	11514248	11514633	+	0	0
INn_00000592	chr1	11519095	11520153	-	0.516221	0.333362
INn_00000593	chr1	11530887	11541589	-	10.5611	7.45107
INn_00000595	chr1	11570258	11571284	+	3.72049	3.31144
INn_00000596	chr1	11577072	11607669	-	1.9957	0.820786
INn_00000598	chr1	11648137	11656576	+	5.34792	4.56774
INn_00000599	chr1	11664072	11668056	+	13.2365	11.6159
INn_00000600	chr1	11673914	11675356	-	1.4856	1.46919
INn_00000601	chr1	11675860	11697821	+	11.7983	13.0856
INn_00000603	chr1	11763176	11765779	-	0	0
INn_00000604	chr1	11767420	11768633	+	0	0
INn_00000605	chr1	11768767	11770426	+	0.231241	0.316967
INn_00000606	chr1	11779054	11780843	+	9.72968	9.16481
INn_00000608	chr1	11786660	11786966	-	0.166555	0.249146
INn_00000609	chr1	11788416	11790689	+	0.790304	0.740018
INn_00000610	chr1	11816362	11817318	-	19.7209	23.9839
INn_00000611	chr1	11847451	11854694	-	6.19906	5.4483
INn_00000612	chr1	11877218	11890357	+	11.4556	10.1781
INn_00000613	chr1	11909368	12047455	+	47.403	46.3273
INn_00000614	chr1	12048461	12052115	-	0.861571	0.508963
INn_00000615	chr1	12081743	12082212	+	5.64807	9.19828
INn_00000616	chr1	12102415	12109870	+	45.1405	43.5253
INn_00000617	chr1	12115737	12119137	-	7.5457	8.44547
INn_00000618	chr1	12140519	12151400	-	31.649	45.4074
INn_00000619	chr1	12190849	12192451	+	0	0
INn_00000620	chr1	12215992	12231617	+	4.86379	4.92816
INn_00000622	chr1	12276489	12292120	+	7.46066	7.98792
INn_00000623	chr1	12298009	12300282	-	3.59771	2.3394
INn_00000624	chr1	12302688	12306807	+	68.3459	69.4492
INn_00000625	chr1	12310267	12311394	-	0.111265	0
INn_00000627	chr1	12322320	12325508	-	44.2748	43.1037
INn_00000628	chr1	12330694	12336040	-	0.110407	0.032353
INn_00000629	chr1	12346531	12346806	+	0	0
INn_00000630	chr1	12347254	12350015	+	12.0699	8.33638
INn_00000631	chr1	12350863	12353493	-	0.020386	0
INn_00000632	chr1	12371675	12372109	+	0	0
INn_00000633	chr1	12379107	12380440	-	0	0
INn_00000634	chr1	12387245	12387673	+	0	0
INn_00000636	chr1	12401245	12403557	-	0.707188	0.270497
INn_00000637	chr1	12407143	12465439	-	10.3233	10.5295
INn_00000639	chr1	12490202	12495583	+	89.2839	72.78
INn_00000640	chr1	12502928	12503530	-	2.87449	5.4858
INn_00000642	chr1	12524734	12525113	+	0	0
INn_00000643	chr1	12531543	12532336	-	0	0
INn_00000645	chr1	12547649	12548488	-	0.41312	0
INn_00000648	chr1	12626158	12626573	+	0	0
INn_00000649	chr1	12648061	12648900	-	0.24668	0
INn_00000650	chr1	12655382	12656176	-	0	0
INn_00000651	chr1	12731504	12731779	-	0.069311	0.126747
INn_00000652	chr1	12766742	12767290	-	0	0
INn_00000653	chr1	12778488	12779027	-	0	0
INn_00000654	chr1	12792940	12801282	+	7.17453	5.03945
INn_00000655	chr1	12803717	12804518	+	4.17933	4.5837
INn_00000656	chr1	12805064	12806896	-	12.2806	11.9725
INn_00000657	chr1	12818594	12865228	+	24.7127	23.7067
INn_00000658	chr1	12867988	12868311	+	6.82306	8.80489
INn_00000659	chr1	12874157	12898991	-	52.7286	45.9735
INn_00000660	chr1	12919105	12923684	+	24.6883	20.1256
INn_00000661	chr1	12925939	12928023	-	5.84321	5.55243
INn_00000662	chr1	12931624	12933565	-	0.972104	1.02322
INn_00000663	chr1	12937123	12939693	-	0.97577	0.837023
INn_00000664	chr1	12941021	12943693	-	0.192074	0.228234
INn_00000666	chr1	12969191	12969496	+	0	0
INn_00000667	chr1	12994993	13118152	+	21.4477	17.1922
INn_00000669	chr1	13043727	13044423	+	0.384759	0.086867
INn_00000670	chr1	13121441	13122625	-	2.94715	2.82298
INn_00000672	chr1	13147053	13170375	-	6.46319	3.62467
INn_00000675	chr1	13198665	13199000	-	0	0
INn_00000676	chr1	13203495	13209255	+	48.2225	41.8108
INn_00000677	chr1	13215132	13242076	-	32.5224	37.4593
INn_00000678	chr1	13258858	13265748	+	0.981346	1.20272
INn_00000680	chr1	13285899	13287501	+	3.12613	6.00056
INn_00000681	chr1	13295642	13296975	+	0	0.043618
INn_00000682	chr1	13299549	13299707	+	0	0
INn_00000684	chr1	13320514	13321138	-	0.085817	0.276783
INn_00000685	chr1	13332240	13332701	+	1.37378	0.826254
INn_00000686	chr1	13348476	13350983	-	19.4053	16.9734
INn_00000687	chr1	13365105	13365671	+	116.311	133.021
INn_00000688	chr1	13365711	13367519	-	4.92654	5.48246
INn_00000689	chr1	13379617	13381973	-	3.3344	4.7919
INn_00000691	chr1	13393250	13393493	-	0	0
INn_00000693	chr1	13405891	13551292	+	7.07757	6.68189
INn_00000694	chr1	13461215	13461552	-	0	0
INn_00000695	chr1	13553669	13555505	+	14.0586	12.0244
INn_00000697	chr1	13585032	13593445	+	125.273	122.712
INn_00000698	chr1	13606182	13606562	-	2.95675	2.66572
INn_00000699	chr1	13606796	13606948	-	1.20826	0.739947
INn_00000700	chr1	13606968	13613388	+	1.1441	2.36052
INn_00000701	chr1	13607021	13608562	-	0.126741	0.013924
INn_00000702	chr1	13617275	13617542	-	27.2145	22.574
INn_00000703	chr1	13620545	13621106	-	0	0
INn_00000704	chr1	13635589	13638273	+	1.80935	2.10329
INn_00000705	chr1	13644237	13644697	-	0.216791	0.082555
INn_00000706	chr1	13645439	13649910	-	11.0528	13.4265
INn_00000707	chr1	13674724	13675061	+	1.79155	0.255901
INn_00000708	chr1	13689667	13699603	-	0	0
INn_00000709	chr1	13732313	13733739	+	0.4616	0.189247
INn_00000710	chr1	13733768	13738786	+	0.773543	0.524007
INn_00000711	chr1	13746824	13751349	+	0.007229	0
INn_00000713	chr1	13747757	13748462	+	0	0
INn_00000714	chr1	13758595	13770957	+	32.1651	26.4928
INn_00000715	chr1	13774823	13779103	-	0.370647	0.051439
INn_00000716	chr1	13784309	13786073	-	0.603366	3.81047
INn_00000718	chr1	13818828	13819718	+	2.00395	1.61189
INn_00000719	chr1	13825158	13832258	-	8.63415	8.22357
INn_00000720	chr1	13831299	13832337	+	0	0
INn_00000721	chr1	13855246	13874443	-	73.679	70.9805
INn_00000723	chr1	13919326	13919852	+	0	0
INn_00000724	chr1	13920030	13920430	+	0	0
INn_00000725	chr1	13927747	13933673	-	1.86979	2.10911
INn_00000726	chr1	13944206	13945132	-	25.6898	24.8469
INn_00000727	chr1	13947224	13948106	-	1.37095	0.896183
INn_00000728	chr1	13954869	13955201	+	0	0
INn_00000730	chr1	13975360	13981051	+	12.1072	5.7643
INn_00000731	chr1	14029037	14033717	+	1.1619	1.46539
INn_00000732	chr1	14033938	14036465	-	7.07545	6.42796
INn_00000733	chr1	14052483	14052994	-	0	0
INn_00000734	chr1	14055382	14060469	+	72.8594	61.3469
INn_00000735	chr1	14055521	14055686	-	0	0
INn_00000736	chr1	14065660	14066270	-	0	0
INn_00000737	chr1	14092404	14097273	+	0.121397	0
INn_00000738	chr1	14111652	14113442	-	0.49852	0.535849
INn_00000739	chr1	14145839	14150175	+	10.7349	12.0933
INn_00000741	chr1	14182556	14193393	+	9.5602	11.252
INn_00000744	chr1	14211213	14219362	+	0	0
INn_00000745	chr1	14219706	14220336	+	0	0
INn_00000746	chr1	14222139	14223230	-	2.46549	2.81785
INn_00000748	chr1	14235512	14236955	+	0.485662	0.376437
INn_00000749	chr1	14247005	14254061	+	85.6794	55.9863
INn_00000751	chr1	14260884	14262446	+	28.1446	30.0013
INn_00000752	chr1	14271280	14274019	-	1.6104	3.44779
INn_00000753	chr1	14295041	14295547	+	0.644259	0.473133
INn_00000755	chr1	14305240	14305626	+	0.104868	0.371507
INn_00000758	chr1	14383454	14384708	-	0.248019	0.708804
INn_00000761	chr1	14460701	14466405	+	6.30212	8.6745
INn_00000762	chr1	14483392	14486409	+	1.38117	0.787301
INn_00000763	chr1	14496930	14502489	-	94.0983	66.9461
INn_00000764	chr1	14508816	14517763	+	8.15331	8.08758
INn_00000765	chr1	14538963	14541467	+	0.411449	0.710599
INn_00000766	chr1	14546284	14549493	+	6.54192	8.42964
INn_00000767	chr1	14573464	14573977	+	0	0
INn_00000768	chr1	14574443	14619198	+	2.0688	0.831607
INn_00000769	chr1	14622678	14626562	+	0.938157	1.46942
INn_00000770	chr1	14630466	14631317	-	0.251809	0.744476
INn_00000771	chr1	14632044	14647308	+	34.7141	30.5262
INn_00000772	chr1	14649754	14651735	+	0.874129	1.07534
INn_00000773	chr1	14665405	14673327	-	20.5554	30.2698
INn_00000774	chr1	14705191	14708684	+	1.4847	1.18247
INn_00000775	chr1	14715272	14715823	+	0	0
INn_00000776	chr1	14728658	14729191	+	0.167736	0.227125
INn_00000777	chr1	14747266	14750622	-	12.4621	9.70974
INn_00000778	chr1	14755519	14756021	+	0	0
INn_00000779	chr1	14772407	14773065	+	0.932718	0.350004
INn_00000780	chr1	14786072	14787592	-	23.2826	18.7791
INn_00000782	chr1	14826118	14826678	-	4.94797	4.56748
INn_00000783	chr1	14833676	14834212	-	2.89251	4.09011
INn_00000784	chr1	14839359	14839946	-	0	0
INn_00000785	chr1	14842643	14843119	-	1.62068	6.85308
INn_00000786	chr1	14857268	14857690	-	0.364754	0.639338
INn_00000787	chr1	14867268	14867702	-	0.219062	0.396351
INn_00000788	chr1	14879154	14885523	-	4.60155	4.47729
INn_00000789	chr1	14948286	15023704	-	5.16937	4.65327
INn_00000790	chr1	15021523	15022232	+	0	0
INn_00000791	chr1	15026811	15035672	-	0.607504	3.08021
INn_00000792	chr1	15037649	15039065	+	0	0.040694
INn_00000793	chr1	15038164	15039032	-	0	0.066356
INn_00000794	chr1	15067824	15072807	-	24.4987	21.8236
INn_00000796	chr1	15171830	15188715	-	0.218076	0.495351
INn_00000797	chr1	15204431	15205063	+	0	0
INn_00000798	chr1	15219622	15242599	-	0.224257	0.059499
INn_00000799	chr1	15254123	15315585	+	0	0
INn_00000800	chr1	15300622	15302302	-	0.026053	0
INn_00000801	chr1	15336279	15337819	+	633.481	538.156
INn_00000804	chr1	15423527	15432466	+	18.519	13.9139
INn_00000805	chr1	15425624	15427314	+	0.149006	0
INn_00000806	chr1	15448751	15451542	+	17.9429	15.8927
INn_00000807	chr1	15458051	15463644	+	0.071546	0.025697
INn_00000808	chr1	15489600	15491171	-	7.14116	4.91051
INn_00000809	chr1	15500112	15502289	+	57.9968	39.9951
INn_00000811	chr1	15557667	15558453	+	0	0
INn_00000812	chr1	15562882	15563391	-	0.277642	0.415325
INn_00000813	chr1	15563721	15563991	+	0.151736	0.224836
INn_00000814	chr1	15566433	15578741	+	11.5106	7.20069
INn_00000815	chr1	15593995	15594486	+	0	0
INn_00000817	chr1	15598407	15599727	-	0	0
INn_00000818	chr1	15614414	15615925	-	0.070946	0.512052
INn_00000819	chr1	15621373	15645044	-	13.0417	9.98845
INn_00000820	chr1	15661301	15661756	+	0	0
INn_00000821	chr1	15663901	15665465	-	3.31958	2.86391
INn_00000822	chr1	15679347	15681914	+	287.989	253.638
INn_00000823	chr1	15683129	15684438	-	0.511788	0.188102
INn_00000826	chr1	15711901	15712206	-	0	0
INn_00000827	chr1	15718387	15718722	-	0	0
INn_00000828	chr1	15719903	15720256	+	0	0
INn_00000829	chr1	15722475	15725330	-	270.903	226.592
INn_00000830	chr1	15738228	15907518	-	15.908	14.3173
INn_00000831	chr1	15779502	15779959	-	0.051426	0
INn_00000832	chr1	15928386	15929712	+	2.09053	5.17925
INn_00000834	chr1	15947122	15949205	-	1.90349	1.02073
INn_00000835	chr1	15974963	15976144	+	1.18781	0.390275
INn_00000836	chr1	15978314	15978685	-	0.037968	0.347735
INn_00000837	chr1	15978338	15978418	+	0	0
INn_00000839	chr1	16006104	16007384	-	0.564686	0.090028
INn_00000841	chr1	16093297	16094157	-	0	0
INn_00000842	chr1	16102128	16102845	+	0	0
INn_00000843	chr1	16104869	16174881	+	26.3327	20.9403
INn_00000844	chr1	16115078	16116735	+	0	0
INn_00000845	chr1	16179035	16179745	+	0	0.081101
INn_00000847	chr1	16205268	16249380	+	7.60558	8.74547
INn_00000848	chr1	16254329	16255714	+	3.13079	0.332832
INn_00000849	chr1	16259166	16262337	+	8.69027	4.20675
INn_00000850	chr1	16320126	16321280	-	0.943075	1.02748
INn_00000851	chr1	16322650	16325967	+	4.39233	4.54456
INn_00000852	chr1	16330547	16330927	-	0	0
INn_00000853	chr1	16337889	16343308	-	33.2372	30.9562
INn_00000854	chr1	16346062	16397749	-	38.7259	44.3272
INn_00000856	chr1	16359619	16366980	+	0	0
INn_00000858	chr1	16408470	16408802	+	0	0
INn_00000860	chr1	16431609	16432407	-	0	0
INn_00000862	chr1	16494045	16495222	-	0.486725	0.24116
INn_00000864	chr1	16530619	16531053	+	0	0
INn_00000866	chr1	16543849	16544862	+	60.1411	37.05
INn_00000867	chr1	16579915	16582415	+	18.8871	12.556
INn_00000868	chr1	16588844	16593247	+	16.7809	23.2796
INn_00000869	chr1	16595630	16597459	+	2.91507	2.38824
INn_00000870	chr1	16597971	16628017	-	25.2991	25.5493
INn_00000871	chr1	16643682	16645648	+	1.41939	4.34863
INn_00000872	chr1	16653206	16670064	+	21.6596	34.8715
INn_00000873	chr1	16680972	16690745	+	26.3756	23.7067
INn_00000875	chr1	16694160	16694482	-	0	0
INn_00000877	chr1	16708920	16709727	+	0	0
INn_00000878	chr1	16711971	16712297	-	0	0
INn_00000881	chr1	16728427	16731558	-	0.386544	0.223509
INn_00000882	chr1	16733984	16734640	+	0	0
INn_00000883	chr1	16736051	16736395	+	0	0
INn_00000884	chr1	16752185	16776164	+	27.6888	23.4276
INn_00000885	chr1	16778393	16796509	-	15.4707	20.6849
INn_00000886	chr1	16799390	16820147	-	25.6591	25.5616
INn_00000887	chr1	16805584	16808134	+	0.063006	0.195676
INn_00000888	chr1	16808391	16808733	+	0.152201	0.046512
INn_00000890	chr1	16876856	16878802	-	6.53723	6.022
INn_00000891	chr1	16884345	16885992	+	12.3399	9.09663
INn_00000892	chr1	16900865	16969163	+	9.54254	10.0357
INn_00000893	chr1	16970206	16977007	-	30.9441	38.3556
INn_00000894	chr1	16979454	16980779	-	1.9011	1.39128
INn_00000896	chr1	16993816	16994521	-	0	0
INn_00000897	chr1	16995954	16996457	+	0	0
INn_00000898	chr1	17000648	17003305	-	0.108245	0.546944
INn_00000899	chr1	17028274	17035977	-	19.8462	18.5236
INn_00000900	chr1	17040027	17040727	-	0.411128	0.164517
INn_00000901	chr1	17076072	17077080	+	0	0
INn_00000903	chr1	17079519	17081097	+	4.86348	4.13542
INn_00000904	chr1	17086862	17087308	+	0	0
INn_00000905	chr1	17093295	17094547	-	0	0
INn_00000906	chr1	17121284	17134823	+	17.6276	14.8652
INn_00000907	chr1	17138974	17140866	-	9.35634	8.49461
INn_00000908	chr1	17149189	17160822	-	1.71337	1.35316
INn_00000909	chr1	17165211	17168199	-	0.20686	0.607699
INn_00000910	chr1	17174672	17176366	-	106.124	91.0338
INn_00000911	chr1	17180057	17185137	-	0	0
INn_00000912	chr1	17201179	17258541	-	7.58819	7.83328
INn_00000914	chr1	17322429	17324138	+	2.62081	1.89861
INn_00000915	chr1	17335687	17336244	+	13.0218	11.2846
INn_00000916	chr1	17339870	17342994	-	0	0
INn_00000918	chr1	17382155	17388755	-	9.75962	11.4931
INn_00000919	chr1	17392377	17394088	-	0	0
INn_00000920	chr1	17395683	17411966	-	11.4931	8.58554
INn_00000921	chr1	17463015	17464647	-	0	0.035311
INn_00000922	chr1	17465384	17468314	+	32.1645	42.9783
INn_00000923	chr1	17471629	17474329	-	1.0914	0.759151
INn_00000924	chr1	17478074	17479705	-	0	0
INn_00000925	chr1	17502808	17511817	+	0.126212	0.10224
INn_00000926	chr1	17552259	17572673	+	78.9865	70.4476
INn_00000928	chr1	17578641	17581404	+	0.472863	0.426119
INn_00000929	chr1	17588448	17592483	+	0	0
INn_00000930	chr1	17659226	17664202	+	196.394	242.424
INn_00000932	chr1	17734852	17735415	-	0	0
INn_00000933	chr1	17800801	17802811	-	0	0
INn_00000934	chr1	17849181	17849960	+	0	0
INn_00000935	chr1	17869299	17869829	+	0	0
INn_00000937	chr1	17980715	18011171	-	23.2306	19.5433
INn_00000938	chr1	18038159	18063609	-	7.55827	7.98985
INn_00000939	chr1	18089124	18112037	-	2.47355	2.80948
INn_00000940	chr1	18140284	18145180	-	7.06247	5.55161
INn_00000941	chr1	18176276	18192471	+	52.8517	44.0112
INn_00000942	chr1	18179867	18180736	+	0.112819	0
INn_00000944	chr1	18240545	18255610	+	0	0.30809
INn_00000945	chr1	18280150	18281371	-	0	0
INn_00000946	chr1	18308143	18309497	+	0	0
INn_00000947	chr1	18313475	18314290	-	0	0
INn_00000948	chr1	18358444	18361130	+	34.7614	26.9519
INn_00000949	chr1	18362785	18364048	-	1.17511	1.17197
INn_00000950	chr1	18364071	18365827	+	1.165	1.86894
INn_00000951	chr1	18364464	18364619	-	0	0
INn_00000952	chr1	18378532	18379425	+	24.6747	2.34568
INn_00000953	chr1	18385504	18392993	-	3.70118	3.40136
INn_00000954	chr1	18394981	18399384	-	18.0434	18.8552
INn_00000955	chr1	18395062	18395681	+	0	0.837326
INn_00000956	chr1	18425555	18427744	+	452.278	306.488
INn_00000957	chr1	18430321	18432254	+	0.044295	0.133525
INn_00000959	chr1	18515283	18518893	+	4.73966	3.48389
INn_00000961	chr1	18588253	18603582	+	11.9849	11.4342
INn_00000962	chr1	18610756	18612245	+	3.22407	2.55827
INn_00000963	chr1	18617111	18617984	+	1.61815	1.46413
INn_00000965	chr1	18656200	18656643	-	0	0
INn_00000967	chr1	18680583	18681245	+	0	0
INn_00000969	chr1	18686778	18687411	+	1.24331	1.77142
INn_00000970	chr1	18690389	18691451	+	0	0
INn_00000971	chr1	18701991	18703470	+	52.4735	42.7085
INn_00000972	chr1	18704685	18705745	+	0.618586	0.220024
INn_00000973	chr1	18735253	18744571	+	5.45107	3.53411
INn_00000975	chr1	18775604	18806074	+	30.8233	26.7657
INn_00000976	chr1	18835043	18838210	+	2.27422	4.3975
INn_00000977	chr1	18842844	18849422	-	9.22604	6.33265
INn_00000979	chr1	18876027	18877767	+	57.5035	38.6039
INn_00000980	chr1	18896799	18898697	-	3.92733	4.32223
INn_00000981	chr1	18945147	18946226	+	0.049662	0.184023
INn_00000982	chr1	18963110	18963409	+	0	0
INn_00000983	chr1	19001618	19001776	+	0	0
INn_00000985	chr1	19025948	19026445	+	0	0
INn_00000987	chr1	19099601	19100251	+	0	0
INn_00000988	chr1	19106106	19111197	+	10.1521	14.6999
INn_00000989	chr1	19114534	19115864	+	23.8401	25.7757
INn_00000990	chr1	19139839	19141635	-	2.82016	2.6995
INn_00000991	chr1	19164070	19167163	+	0	0.095078
INn_00000992	chr1	19169141	19169314	-	4.06992	1.24937
INn_00000993	chr1	19169815	19274230	-	1.78755	0.859958
INn_00000994	chr1	19281072	19283411	-	34.6535	33.3369
INn_00000995	chr1	19333042	19335894	+	30.3949	60.7404
INn_00000996	chr1	19356030	19357292	+	0	0
INn_00000997	chr1	19364981	19366284	+	0.162838	0.406867
INn_00000998	chr1	19381794	19383087	+	0	0
INn_00000999	chr1	19387170	19387631	-	0	0
INn_00001000	chr1	19413172	19414653	+	0.036191	0.037223
INn_00001001	chr1	19428652	19430097	+	10.148	7.12536
INn_00001002	chr1	19430459	19431227	-	0	0
INn_00001004	chr1	19464008	19468204	+	0	0
INn_00001005	chr1	19494038	19494205	-	0	0
INn_00001006	chr1	19496081	19508393	+	16.236	16.9603
INn_00001008	chr1	19520900	19523535	-	87.2285	19.5599
INn_00001009	chr1	19579278	19582821	-	25.4149	23.9864
INn_00001010	chr1	19622332	19623619	-	7.94264	8.49226
INn_00001011	chr1	19627148	19678407	-	6.87287	6.90045
INn_00001012	chr1	19694900	19695845	+	0	0
INn_00001013	chr1	19698675	19700712	+	0	0
INn_00001015	chr1	19735193	19738356	-	0.152878	0.246214
INn_00001016	chr1	19736953	19737543	+	0	0
INn_00001017	chr1	19741270	19743173	+	0	0
INn_00001019	chr1	19749749	19810314	+	18.6579	16.7677
INn_00001020	chr1	19755882	19756209	-	0	0
INn_00001021	chr1	19811855	19881648	-	11.6734	10.7838
INn_00001022	chr1	19909473	19909795	+	4.38216	3.06525
INn_00001023	chr1	19914750	19917053	+	2.97625	2.14343
INn_00001024	chr1	19957440	19959357	+	0.067979	0.068002
INn_00001025	chr1	19974628	19979120	-	0	0
INn_00001027	chr1	19984166	19985644	+	1.54596	0.921024
INn_00001028	chr1	19998924	20000286	-	0.059026	0.082104
INn_00001029	chr1	20003674	20003928	-	1.79002	0.732509
INn_00001030	chr1	20005237	20008128	+	7.03545	6.69453
INn_00001031	chr1	20010132	20061205	+	2.51781	3.29211
INn_00001032	chr1	20062631	20063329	-	18.1769	17.9809
INn_00001033	chr1	20066274	20086338	-	39.8956	32.8937
INn_00001036	chr1	20125660	20126700	-	24.7705	21.0606
INn_00001038	chr1	20152229	20154595	-	0	0
INn_00001039	chr1	20160776	20163955	+	0	0.165027
INn_00001040	chr1	20165491	20165903	+	0	0
INn_00001041	chr1	20167779	20168536	+	0.776306	0.503668
INn_00001042	chr1	20168312	20168679	-	0.505066	0.414686
INn_00001043	chr1	20170298	20173165	-	0.241808	0.301585
INn_00001044	chr1	20191473	20196075	+	0	0
INn_00001045	chr1	20214356	20215413	+	0.036219	0
INn_00001046	chr1	20222495	20222710	+	0.020693	0
INn_00001047	chr1	20223525	20224506	-	0.300933	0
INn_00001048	chr1	20240292	20241186	-	12.0175	11.7521
INn_00001049	chr1	20259940	20265624	-	16.2958	17.0225
INn_00001050	chr1	20294453	20296564	+	4.66799	3.65733
INn_00001051	chr1	20309618	20314807	-	2.82999	4.32481
INn_00001053	chr1	20341816	20342859	+	0	0
INn_00001054	chr1	20345912	20346661	-	0	0
INn_00001055	chr1	20357382	20357966	+	1.8832	3.42134
INn_00001056	chr1	20367430	20367603	-	12.519	12.9654
INn_00001058	chr1	20420814	20423646	-	57.8765	51.503
INn_00001059	chr1	20479949	20480853	-	0.409328	0.695567
INn_00001060	chr1	20484904	20485327	+	15.7758	16.2245
INn_00001061	chr1	20487187	20489208	+	0	0
INn_00001062	chr1	20494272	20495863	+	0	0
INn_00001064	chr1	20522695	20523327	+	0	0
INn_00001065	chr1	20537993	20568177	+	29.1155	28.0792
INn_00001066	chr1	20571714	20571893	-	0	0
INn_00001067	chr1	20579977	20580378	+	4.4967	1.88421
INn_00001068	chr1	20580054	20580656	-	4.3137	1.17437
INn_00001069	chr1	20598476	20598904	-	0	0
INn_00001070	chr1	20615585	20616106	+	0	0
INn_00001071	chr1	20620510	20622251	+	35.2957	66.8196
INn_00001072	chr1	20621512	20633869	-	0	0.077765
INn_00001073	chr1	20633264	20633662	+	5.62432	1.44663
INn_00001074	chr1	20643283	20643693	-	123.6	295.889
INn_00001075	chr1	20679348	20683194	+	34.756	30.9057
INn_00001076	chr1	20682084	20682426	-	0	0
INn_00001077	chr1	20682185	20682313	+	0	0
INn_00001078	chr1	20705290	20710189	+	47.3498	50.3498
INn_00001079	chr1	20725634	20726340	+	0.106706	0
INn_00001080	chr1	20733938	20750716	-	42.2641	35.6559
INn_00001081	chr1	20756300	20756674	+	0	0
INn_00001082	chr1	20783189	20811445	-	12.4139	8.68035
INn_00001083	chr1	20824180	20824435	+	0	0
INn_00001084	chr1	20824468	20826461	+	0	0
INn_00001085	chr1	20850538	20851356	-	0	0
INn_00001086	chr1	20866350	20867231	+	5.30496	2.17315
INn_00001087	chr1	20872762	20889163	-	34.0744	42.2801
INn_00001088	chr1	20893863	20894396	+	0	0
INn_00001089	chr1	20934124	20937300	-	6.42672	7.301
INn_00001090	chr1	21001019	21003255	+	62.845	65.8281
INn_00001091	chr1	21025549	21027226	-	0.503851	0.059142
INn_00001093	chr1	21096403	21097269	+	0	0
INn_00001094	chr1	21120084	21122366	+	9.72331	4.9316
INn_00001095	chr1	21124480	21125880	+	0	0.102348
INn_00001096	chr1	21187141	21187527	-	11.1045	14.829
INn_00001097	chr1	21189537	21194153	+	118.532	167.282
INn_00001098	chr1	21229593	21234467	+	18.8224	7.61248
INn_00001099	chr1	21261628	21262023	+	0	0
INn_00001100	chr1	21262121	21262481	+	0	0
INn_00001101	chr1	21270912	21272414	+	2.42281	2.74952
INn_00001102	chr1	21272884	21273356	-	0	0
INn_00001103	chr1	21292980	21293997	-	68.348	19.4366
INn_00001104	chr1	21329145	21338079	-	38.4309	36.255
INn_00001105	chr1	21354786	21357878	-	3.03633	3.21209
INn_00001106	chr1	21409584	21412586	+	2.80429	1.9189
INn_00001107	chr1	21429404	21430464	+	4.0952	4.48121
INn_00001109	chr1	21436525	21437025	+	7.20812	7.86873
INn_00001110	chr1	21439392	21441183	-	0.61108	0.606664
INn_00001111	chr1	21439412	21440380	+	0	0
INn_00001112	chr1	21445106	21446883	+	1.96155	2.59816
INn_00001113	chr1	21450743	21456856	-	0.738546	0.629017
INn_00001114	chr1	21456857	21457143	+	0	0.676419
INn_00001115	chr1	21458003	21459298	+	0	0
INn_00001117	chr1	21472827	21475407	-	4.63676	6.0734
INn_00001120	chr1	21488463	21490355	-	0	0
INn_00001121	chr1	21505809	21507962	+	0.543907	0.506136
INn_00001122	chr1	21529616	21540092	+	3.53606	3.2422
INn_00001124	chr1	21586984	21590680	+	0	0
INn_00001125	chr1	21595424	21600118	+	0	0
INn_00001126	chr1	21615652	21616284	-	92.8731	107.667
INn_00001128	chr1	21725448	21726062	+	0.768047	0.474744
INn_00001129	chr1	21771124	21771405	-	0	0
INn_00001130	chr1	21794019	21794732	-	463.153	894.001
INn_00001131	chr1	21799503	21801173	-	0.096293	0.396498
INn_00001133	chr1	21808512	21808795	+	0.006295	0.215898
INn_00001134	chr1	21828126	21829162	-	0	0.091564
INn_00001135	chr1	21846284	21847197	+	6.52141	3.93856
INn_00001136	chr1	21851206	21853972	+	72.9286	63.4935
INn_00001137	chr1	21876580	21877614	+	0.420446	1.63781
INn_00001138	chr1	21895370	21896167	+	0	0
INn_00001140	chr1	21905261	21906438	-	0.219822	0.394427
INn_00001142	chr1	22034415	22036903	-	1.69163	0.735704
INn_00001144	chr1	22089672	22099275	-	9.69564	8.25288
INn_00001145	chr1	22105301	22105626	-	0	0
INn_00001146	chr1	22114084	22115818	+	8.33456	23.7623
INn_00001147	chr1	22117786	22118425	-	0.078807	0.086763
INn_00001148	chr1	22121257	22122567	+	15.5234	13.943
INn_00001149	chr1	22125963	22126296	-	0.129823	0
INn_00001151	chr1	22161039	22161377	-	0	0
INn_00001153	chr1	22186201	22189010	-	100.13	88.2903
INn_00001154	chr1	22213808	22278692	+	17.6152	12.1602
INn_00001156	chr1	22331867	22332468	+	9.75683	12.0297
INn_00001157	chr1	22332846	22335020	+	0.673017	1.04739
INn_00001158	chr1	22335121	22335825	+	1.26367	2.34933
INn_00001159	chr1	22344329	22347897	+	284.091	273.937
INn_00001161	chr1	22375848	22377668	+	26.2869	22.4961
INn_00001163	chr1	22417210	22421746	-	124.352	88.125
INn_00001165	chr1	22450638	22450992	-	2.70896	2.60912
INn_00001167	chr1	22455852	22456821	+	1.34568	1.2777
INn_00001168	chr1	22462162	22464357	-	621.64	505.902
INn_00001169	chr1	22515798	22586277	+	11.1235	9.5308
INn_00001171	chr1	22588285	22589861	-	1.49569	1.11487
INn_00001172	chr1	22591373	22593888	-	14.9695	10.9316
INn_00001173	chr1	22626887	22631286	-	15.0752	10.3867
INn_00001174	chr1	22637383	22644486	+	29.4919	31.0318
INn_00001175	chr1	22728960	22731863	+	0	0
INn_00001176	chr1	22746540	22754626	-	2.10899	5.02034
INn_00001179	chr1	22895861	22897363	-	11.1881	9.88508
INn_00001180	chr1	22990489	22993227	-	1.6543	0.683987
INn_00001181	chr1	22998742	22999932	-	0	0
INn_00001182	chr1	23004470	23173975	-	1.38992	0.753107
INn_00001183	chr1	23018719	23018931	-	0	0
INn_00001184	chr1	23248557	23251069	-	330.56	392.614
INn_00001186	chr1	23270906	23271189	-	0	0
INn_00001187	chr1	23312470	23352478	+	19.3245	17.6745
INn_00001188	chr1	23353414	23376853	-	18.0153	15.8792
INn_00001189	chr1	23373577	23374069	+	0	0
INn_00001190	chr1	23383403	23385270	+	6.51044	2.25734
INn_00001191	chr1	23417327	23418787	-	66.1351	97.8898
INn_00001192	chr1	23420181	23421305	-	0	0
INn_00001193	chr1	23428104	23428841	+	0.042152	0.006251
INn_00001194	chr1	23440219	23441763	-	0	0
INn_00001195	chr1	23453082	23454769	-	218.334	216.46
INn_00001196	chr1	23465660	23465944	+	0	0
INn_00001197	chr1	23469229	23470015	+	0	0
INn_00001198	chr1	23474626	23475514	+	0	0
INn_00001199	chr1	23496037	23533765	+	14.4014	15.4255
INn_00001200	chr1	23534345	23536150	+	27.0787	27.6492
INn_00001201	chr1	23545852	23563719	+	20.4995	19.7752
INn_00001202	chr1	23584717	23585046	+	1.06946	0.25861
INn_00001203	chr1	23590070	23600089	+	1.71608	0.563045
INn_00001204	chr1	23611937	23615108	+	8.28538	8.08448
INn_00001205	chr1	23618496	23626506	-	8.58948	4.43993
INn_00001207	chr1	23688514	23692272	+	31.5769	31.5909
INn_00001208	chr1	23692270	23694300	-	0.098767	0.189466
INn_00001210	chr1	23727277	23729512	+	0.947717	0.669759
INn_00001212	chr1	23738014	23744859	+	15.7333	13.2008
INn_00001213	chr1	23761463	23766763	+	30.6373	32.682
INn_00001214	chr1	23772704	23773614	+	19.9333	6.44686
INn_00001215	chr1	23775044	23777074	-	48.9421	37.2231
INn_00001216	chr1	23788546	23789395	-	0.145341	0.067839
INn_00001218	chr1	23792274	23793965	-	0	0.228124
INn_00001219	chr1	23806588	23807254	-	0.887638	0.527642
INn_00001220	chr1	23810652	23810948	+	0.584511	0.282167
INn_00001221	chr1	23827894	23855836	+	15.2336	12.8997
INn_00001222	chr1	23836411	23836791	-	0	0
INn_00001225	chr1	23896914	23897525	-	19.2132	26.0922
INn_00001226	chr1	23925650	23927179	+	1.84954	2.17939
INn_00001227	chr1	23928172	23982478	-	31.9599	29.1715
INn_00001228	chr1	23998200	23998738	-	0	0
INn_00001230	chr1	24006084	24008548	-	0	0
INn_00001231	chr1	24025005	24123858	-	6.2834	5.13579
INn_00001232	chr1	24089247	24091150	+	0.024813	0
INn_00001235	chr1	24208212	24208613	+	0	0
INn_00001236	chr1	24223642	24228530	+	0	0
INn_00001237	chr1	24239142	24239953	-	0	0
INn_00001239	chr1	24269802	24278712	+	0	0.012949
INn_00001242	chr1	24349177	24353227	+	10.7051	3.03372
INn_00001243	chr1	24355152	24355534	-	0	0
INn_00001244	chr1	24377952	24389539	+	3.86441	4.03655
INn_00001245	chr1	24392513	24393311	+	0	0
INn_00001246	chr1	24400685	24401119	-	0.088365	0.397676
INn_00001247	chr1	24403966	24404421	-	0	0
INn_00001248	chr1	24407676	24416750	-	31.8485	25.4143
INn_00001249	chr1	24415088	24416468	+	0	0
INn_00001250	chr1	24423460	24424620	+	0	0
INn_00001251	chr1	24424644	24425589	+	0	0
INn_00001252	chr1	24430582	24434120	-	31.5259	26.6742
INn_00001253	chr1	24442141	24448126	+	4.44457	4.73334
INn_00001254	chr1	24451972	24517201	-	8.78112	9.05794
INn_00001256	chr1	24519681	24521359	+	2.36053	2.28461
INn_00001257	chr1	24521011	24521448	-	22.3781	24.9923
INn_00001261	chr1	24560674	24561056	+	0	0
INn_00001262	chr1	24572530	24573396	-	2.51103	2.90422
INn_00001263	chr1	24574883	24577662	+	0.21097	0.144987
INn_00001264	chr1	24585527	24588309	-	71.8781	75.0999
INn_00001265	chr1	24592497	24593051	-	2.63957	2.38479
INn_00001266	chr1	24639087	24646492	+	184.113	150.166
INn_00001267	chr1	24646870	24648923	-	32.8322	26.2166
INn_00001268	chr1	24650376	24683715	+	8.8101	8.77858
INn_00001269	chr1	24685094	24685381	-	1.4849	1.49564
INn_00001270	chr1	24687456	24689401	-	2.87186	4.26042
INn_00001271	chr1	24708447	24708793	-	0	0
INn_00001272	chr1	24714003	24715724	-	2.11634	1.53322
INn_00001273	chr1	24732555	24740025	+	51.7359	48.5315
INn_00001274	chr1	24739711	24742296	-	3.87325	4.21454
INn_00001275	chr1	24787698	24790887	+	31.4543	27.805
INn_00001276	chr1	24839115	24925646	-	18.2909	14.6914
INn_00001277	chr1	25028650	25030418	+	1.30334	0.94421
INn_00001278	chr1	25036356	25044515	+	12.6009	14.4766
INn_00001279	chr1	25095690	25095881	-	0	0
INn_00001282	chr1	25180187	25181157	+	0	0
INn_00001283	chr1	25192883	25201067	-	76.1124	87.1843
INn_00001284	chr1	25251255	25266263	-	31.6471	25.8528
INn_00001285	chr1	25292609	25295201	-	0	0
INn_00001286	chr1	25302663	25307895	-	243.668	156.362
INn_00001287	chr1	25313809	25320969	-	12.6677	11.3566
INn_00001288	chr1	25316757	25317042	-	0.026255	0
INn_00001289	chr1	25333438	25439894	-	1.20903	0.708686
INn_00001291	chr1	25452397	25454144	-	0.075409	0
INn_00001292	chr1	25483876	25484692	-	0	0
INn_00001293	chr1	25492440	25493696	-	16.3479	12.8704
INn_00001294	chr1	25541916	25543953	+	5.76918	5.35205
INn_00001295	chr1	25565633	25566929	+	6.14133	3.12802
INn_00001296	chr1	25578214	25578984	+	12.6352	13.015
INn_00001297	chr1	25579909	25580748	-	0.426522	0
INn_00001299	chr1	25615889	25616206	+	0.086581	0
INn_00001300	chr1	25640699	25644553	-	7.57463	5.78249
INn_00001303	chr1	25697292	25730966	+	23.4497	24.1835
INn_00001304	chr1	25727559	25728893	-	0.434038	0.757179
INn_00001306	chr1	25846182	25847180	+	4.21155	7.13102
INn_00001307	chr1	25863930	25864943	+	0	0
INn_00001308	chr1	25870138	25875709	-	1.88623	2.20596
INn_00001310	chr1	25883743	25883988	-	1.02619	0.809471
INn_00001311	chr1	25884500	25884677	+	0	0
INn_00001312	chr1	25913863	25914780	+	0.002921	0
INn_00001314	chr1	25918251	25930746	-	0	0
INn_00001316	chr1	25976881	25978263	-	0	0.324197
INn_00001317	chr1	25998463	26078221	-	21.6674	23.1102
INn_00001322	chr1	26101637	26102384	-	0	0
INn_00001323	chr1	26121224	26122719	-	307.251	103.881
INn_00001324	chr1	26176347	26176759	+	0	0
INn_00001325	chr1	26177170	26177421	+	0	0
INn_00001328	chr1	26235636	26246386	-	29.9405	29.5611
INn_00001329	chr1	26266075	26283919	+	93.5417	116.885
INn_00001330	chr1	26307537	26308344	-	18.7788	11.5392
INn_00001331	chr1	26309953	26310980	+	0	0
INn_00001332	chr1	26352496	26354957	+	2.02876	2.64819
INn_00001333	chr1	26444398	26444727	+	0	0
INn_00001334	chr1	26445691	26446212	+	0	0
INn_00001335	chr1	26471780	26472113	-	0	0
INn_00001336	chr1	26487339	26490557	+	0	0.098511
INn_00001337	chr1	26500113	26500388	-	0	0
INn_00001338	chr1	26502857	26503267	-	0	0
INn_00001339	chr1	26524753	26530742	+	2.99297	6.2264
INn_00001340	chr1	26534954	26538938	+	0.569004	0.978667
INn_00001341	chr1	26558740	26561410	-	0	0.024995
INn_00001342	chr1	26578496	26580929	-	1.16556	1.7736
INn_00001344	chr1	26623649	26625235	+	0	0
INn_00001345	chr1	26677814	26683798	+	8.54393	8.4583
INn_00001346	chr1	26697021	26697860	+	0	0
INn_00001347	chr1	26721341	26726879	-	1.87914	2.32358
INn_00001348	chr1	26761115	26763268	+	15.5497	8.99523
INn_00001349	chr1	26766566	26767172	-	0	0
INn_00001350	chr1	26772410	26773315	-	0.236406	0.227428
INn_00001352	chr1	26814014	26818594	+	0.14244	0.214477
INn_00001353	chr1	26820064	26822049	-	2.01912	2.34306
INn_00001354	chr1	26827868	26830156	+	2.9114	2.24045
INn_00001355	chr1	26835099	26835555	-	0	0
INn_00001356	chr1	26845797	26869426	+	1.98294	1.98212
INn_00001357	chr1	26870863	26872139	+	2.18364	3.81516
INn_00001358	chr1	26879865	26882407	+	58.5256	55.0016
INn_00001359	chr1	26892034	26892847	-	0	0
INn_00001360	chr1	26893669	26893887	-	0	0
INn_00001361	chr1	26897867	26900607	-	27.5556	18.0729
INn_00001362	chr1	26947623	26950116	-	17.243	11.8468
INn_00001364	chr1	27031331	27035181	-	36.467	50.0261
INn_00001365	chr1	27046434	27046937	+	0	0
INn_00001366	chr1	27078013	27078629	-	0	0
INn_00001367	chr1	27099068	27099740	-	0	0
INn_00001368	chr1	27099978	27100317	-	0	0
INn_00001369	chr1	27110858	27117927	-	0.680212	1.6245
INn_00001370	chr1	27112553	27113524	-	0.853825	1.27191
INn_00001372	chr1	27160365	27162801	+	1.73774	3.85083
INn_00001373	chr1	27190303	27198458	-	29.5462	32.5402
INn_00001374	chr1	27252201	27254374	-	7.07071	10.3226
INn_00001375	chr1	27270799	27271151	-	0	0
INn_00001377	chr1	27291915	27405250	-	2.64416	0.830761
INn_00001378	chr1	27432189	27432562	+	0	0
INn_00001379	chr1	27434794	27444092	+	0	0
INn_00001380	chr1	27483692	27484033	-	0.810804	1.16844
INn_00001382	chr1	27502011	27502975	+	0	0
INn_00001383	chr1	27532516	27535953	+	11.684	13.6642
INn_00001384	chr1	27537483	27538337	+	25.9942	36.1489
INn_00001385	chr1	27538985	27539350	-	0.431819	0.49313
INn_00001386	chr1	27539485	27539700	-	0.413025	0.266959
INn_00001387	chr1	27540653	27555458	-	28.2631	26.575
INn_00001388	chr1	27560123	27561325	+	0	0
INn_00001390	chr1	27585701	27587166	+	0.511353	0.648611
INn_00001391	chr1	27587786	27590812	-	10.3218	12.8962
INn_00001392	chr1	27612126	27612664	-	0	0
INn_00001393	chr1	27626061	27626391	+	2.16657	5.41451
INn_00001394	chr1	27630581	27644681	+	19.9383	15.1989
INn_00001395	chr1	27648468	27651478	-	1.96173	3.0421
INn_00001396	chr1	27666206	27671948	-	11.5998	9.29351
INn_00001397	chr1	27697276	27697965	-	0	0
INn_00001398	chr1	27738702	27739193	-	0.10833	0
INn_00001399	chr1	27756597	27756877	-	0	0
INn_00001400	chr1	27835961	27836671	-	8.61435	11.4207
INn_00001401	chr1	27861863	27867443	+	0	0
INn_00001402	chr1	27881399	27909400	+	13.3014	12.1092
INn_00001404	chr1	27917284	27944937	-	18.8884	24.3661
INn_00001405	chr1	27945251	27947454	+	2.8931	2.4661
INn_00001406	chr1	27947845	27950682	-	16.6394	21.4134
INn_00001407	chr1	27952274	28004582	-	28.8975	22.7316
INn_00001409	chr1	28025699	28028419	-	15.3627	13.7434
INn_00001411	chr1	28034014	28035213	-	0.30006	0
INn_00001412	chr1	28064706	28066388	+	6.48734	4.46469
INn_00001413	chr1	28081656	28082512	-	1.80954	0.974284
INn_00001414	chr1	28082875	28083016	-	0	0
INn_00001415	chr1	28086722	28088184	+	0.047281	0
INn_00001416	chr1	28114575	28116378	+	32.9016	25.1213
INn_00001417	chr1	28135121	28136230	+	0	0
INn_00001418	chr1	28136314	28137129	-	0	0
INn_00001419	chr1	28157594	28158127	-	0	0
INn_00001420	chr1	28158317	28158535	+	0	0
INn_00001422	chr1	28171889	28173532	+	0	0.07015
INn_00001423	chr1	28216432	28218767	+	21.4247	24.5606
INn_00001424	chr1	28220912	28255867	-	1.98861	4.02925
INn_00001425	chr1	28256253	28256524	+	0.416726	1.16598
INn_00001426	chr1	28257701	28280661	-	0.354434	0.336398
INn_00001427	chr1	28294538	28308828	+	30.2526	29.3602
INn_00001428	chr1	28310698	28312959	-	0	0
INn_00001430	chr1	28374895	28375464	+	0	0
INn_00001431	chr1	28385465	28385797	+	0	0
INn_00001432	chr1	28412474	28415287	-	10.0767	10.5585
INn_00001433	chr1	28450987	28455116	-	6.40729	6.29662
INn_00001434	chr1	28491335	28496358	+	0.441555	0.177176
INn_00001435	chr1	28508860	28522497	-	15.5199	17.2935
INn_00001436	chr1	28525513	28526312	+	0.067044	0.722753
INn_00001437	chr1	28525843	28526305	-	0.867279	2.32512
INn_00001438	chr1	28528655	28529323	+	1.36587	2.11
INn_00001439	chr1	28554457	28558147	-	0	0
INn_00001440	chr1	28563370	28590927	-	16.2765	13.9149
INn_00001441	chr1	28600987	28615124	+	42.9268	40.0637
INn_00001442	chr1	28618530	28626353	+	2.26707	2.19952
INn_00001443	chr1	28628070	28629808	+	0.061685	0.033159
INn_00001444	chr1	28630197	28632987	+	0.134008	0.041321
INn_00001448	chr1	28722517	28722816	-	0	0
INn_00001450	chr1	28749689	28752183	+	0	0
INn_00001451	chr1	28801488	28806757	+	54.6212	41.1303
INn_00001452	chr1	28836997	28849882	+	28.7455	32.6363
INn_00001453	chr1	28853325	28855853	-	1.32042	1.26772
INn_00001454	chr1	28866607	28872987	+	1.1236	1.00667
INn_00001455	chr1	28880975	28881881	-	0	0
INn_00001456	chr1	28898089	28899340	-	5.59735	7.05707
INn_00001457	chr1	28899050	28899269	+	7.39599	6.92569
INn_00001458	chr1	28901690	28905072	-	1.32056	1.46838
INn_00001459	chr1	28916908	28917231	+	0	0
INn_00001460	chr1	28922742	28937867	+	21.7791	23.0821
INn_00001461	chr1	28947579	28948109	+	0	0
INn_00001462	chr1	28978219	28979884	-	0.546978	1.08309
INn_00001463	chr1	29024640	29024894	-	2.62288	2.59371
INn_00001466	chr1	29128326	29128866	+	10.7915	9.66665
INn_00001467	chr1	29132215	29135455	-	10.2166	9.42883
INn_00001468	chr1	29148082	29149506	+	0.064494	0.167738
INn_00001469	chr1	29150164	29152907	+	1.18402	1.56563
INn_00001470	chr1	29153617	29156211	-	9.70211	10.3475
INn_00001471	chr1	29164729	29165085	-	0	0
INn_00001472	chr1	29179421	29181395	-	0.936831	0.963192
INn_00001473	chr1	29204938	29211578	-	2.04072	2.83075
INn_00001474	chr1	29235395	29236078	+	0	0
INn_00001475	chr1	29242759	29245829	+	83.3154	80.2102
INn_00001476	chr1	29246658	29246895	-	0.295753	2.26821
INn_00001477	chr1	29246671	29247853	+	37.194	31.0297
INn_00001478	chr1	29249342	29253317	-	1.11758	1.33128
INn_00001479	chr1	29276851	29277114	-	1.27723	2.28687
INn_00001480	chr1	29317613	29320764	+	0.068065	0.018294
INn_00001481	chr1	29335507	29348484	+	8.00191	5.85158
INn_00001483	chr1	29388545	29389791	-	0	0
INn_00001484	chr1	29394179	29395933	-	7.89335	6.78744
INn_00001485	chr1	29415682	29430355	-	10.5909	9.33147
INn_00001486	chr1	29439341	29472766	-	15.9962	13.2338
INn_00001487	chr1	29484614	29485017	+	80.7202	57.56
INn_00001488	chr1	29500920	29521536	+	69.4262	59.5928
INn_00001489	chr1	29542784	29545190	+	56.1104	64.1397
INn_00001490	chr1	29547881	29554838	-	19.3034	20.1022
INn_00001491	chr1	29587433	29587885	-	2.8048	3.00923
INn_00001494	chr1	29630904	29657791	-	1.86289	1.58015
INn_00001495	chr1	29657802	29658862	-	1.73009	1.67505
INn_00001497	chr1	29712608	29714511	+	0	0.05743
INn_00001498	chr1	29723733	29724056	-	0	0
INn_00001500	chr1	29751153	29753537	+	0.134932	0.255155
INn_00001502	chr1	29776710	29779539	-	0	0
INn_00001503	chr1	29803956	29804243	-	0	0
INn_00001504	chr1	29806713	29819766	+	20.75	17.7481
INn_00001505	chr1	29825661	29827157	+	0.107486	0.385191
INn_00001506	chr1	29829678	29831707	-	2.23172	2.30065
INn_00001507	chr1	29846761	29847473	-	0	0
INn_00001508	chr1	29847901	29848441	+	0	0
INn_00001509	chr1	29871030	29871321	+	0	0
INn_00001510	chr1	29905430	29906780	+	0	0
INn_00001511	chr1	29932993	29937739	+	0.420773	1.12243
INn_00001515	chr1	29983323	29996569	+	13.2476	10.2036
INn_00001516	chr1	30080038	30084897	+	2.39262	2.53752
INn_00001517	chr1	30025154	30025479	+	0	0
INn_00001518	chr1	30025834	30026493	+	0.243255	0.125228
INn_00001519	chr1	30033479	30036165	+	0.394491	0.281711
INn_00001520	chr1	30046428	30050166	-	41.0247	34.6264
INn_00001521	chr1	30061081	30062564	-	0.270586	0.155426
INn_00001522	chr1	30078890	30079855	+	0.436521	0.077255
INn_00001523	chr1	30080038	30080844	-	0.716934	1.0698
INn_00001524	chr1	30082061	30083481	-	0.26789	0.281465
INn_00001526	chr1	30106100	30110583	-	56.5918	52.6498
INn_00001527	chr1	30137299	30142022	+	10.9372	13.3325
INn_00001528	chr1	30161531	30161922	-	0.136097	0
INn_00001529	chr1	30168812	30170359	+	0.057973	0
INn_00001530	chr1	30197112	30199007	-	0.028289	0.091239
INn_00001532	chr1	30207017	30207304	+	0	0
INn_00001533	chr1	30213633	30215330	-	0.078863	0.03362
INn_00001535	chr1	30257595	30261421	+	0.676448	0.682096
INn_00001536	chr1	30264031	30264396	-	0	0
INn_00001537	chr1	30295973	30298343	-	0	0
INn_00001539	chr1	30335862	30340560	+	3.49269	1.80534
INn_00001540	chr1	30362394	30365339	+	5.90535	5.93046
INn_00001541	chr1	30379066	30391064	-	33.5558	26.8261
INn_00001543	chr1	30420407	30421013	-	0	0
INn_00001544	chr1	30425516	30428299	+	222.884	176.193
INn_00001545	chr1	30428800	30444742	-	23.4423	25.4181
INn_00001546	chr1	30429285	30429822	-	0	0
INn_00001548	chr1	30463808	30464151	-	0	0
INn_00001549	chr1	30470134	30470662	-	0	0
INn_00001550	chr1	30474565	30475065	-	0	0
INn_00001551	chr1	30479137	30480098	+	0	0
INn_00001552	chr1	30494529	30497533	-	2.64337	1.65671
INn_00001554	chr1	30518767	30524903	+	0	0.060129
INn_00001555	chr1	30518817	30519112	-	0	0
INn_00001556	chr1	30531211	30543463	+	1.76303	2.16227
INn_00001558	chr1	30555614	30556030	+	0	0
INn_00001559	chr1	30566071	30569527	+	1.31651	0.633457
INn_00001560	chr1	30570666	30574874	+	35.4802	32.8732
INn_00001561	chr1	30585449	30602887	-	5.61684	2.73374
INn_00001562	chr1	30627189	30628632	+	0	0
INn_00001563	chr1	30645290	30647843	+	0	0
INn_00001564	chr1	30661224	30665025	-	0.766031	1.19607
INn_00001566	chr1	30677866	30799969	-	16.2676	13.6294
INn_00001568	chr1	30778433	30778585	+	0	0
INn_00001569	chr1	30802832	30802987	+	0	0
INn_00001570	chr1	30816491	30838344	+	21.3922	19.8796
INn_00001571	chr1	30840582	30842666	-	25.2473	57.5085
INn_00001573	chr1	30894608	30899335	-	5.82904	8.48389
INn_00001574	chr1	30940338	30942176	-	4.36423	3.12429
INn_00001575	chr1	31002506	31008558	+	0	0
INn_00001576	chr1	31016917	31021458	+	3.8637	4.89075
INn_00001577	chr1	31026845	31028192	+	1.01462	1.139
INn_00001578	chr1	31028363	31029523	-	3.72537	3.67037
INn_00001579	chr1	31041140	31042091	-	0	0
INn_00001580	chr1	31045329	31171254	-	32.4573	31.8216
INn_00001581	chr1	31146710	31148827	+	0	0
INn_00001582	chr1	31169036	31169866	+	0	0
INn_00001583	chr1	31178249	31183585	-	0.682711	0.323952
INn_00001584	chr1	31183547	31184056	+	0	0
INn_00001585	chr1	31184946	31185843	+	0.159246	0
INn_00001586	chr1	31199078	31208569	+	13.7292	15.8802
INn_00001587	chr1	31220165	31222855	+	7.07291	4.60481
INn_00001588	chr1	31240609	31242707	-	3.87653	2.81406
INn_00001589	chr1	31244696	31245624	+	3.41544	4.68647
INn_00001590	chr1	31249331	31250892	-	0.772482	0.311942
INn_00001591	chr1	31275702	31285607	+	12.0027	12.4164
INn_00001592	chr1	31319545	31320294	-	0	0
INn_00001593	chr1	31336953	31340082	+	5.46613	3.95192
INn_00001594	chr1	31342793	31376113	+	11.8054	8.21269
INn_00001595	chr1	31379847	31380775	-	260.213	175.376
INn_00001596	chr1	31391088	31406261	+	13.2997	18.3451
INn_00001597	chr1	31410679	31418079	-	22.196	19.4494
INn_00001598	chr1	31432200	31434070	-	0.215	0.323604
INn_00001600	chr1	31475609	31476010	-	0	0
INn_00001601	chr1	31476191	31476716	-	0.085405	0
INn_00001602	chr1	31551132	31556163	+	31.3789	18.5583
INn_00001603	chr1	31565313	31566362	-	6.64052	4.33883
INn_00001604	chr1	31568241	31568612	-	0	0
INn_00001605	chr1	31569264	31575545	-	0	0
INn_00001606	chr1	31585079	31585479	+	0.066877	0.575193
INn_00001607	chr1	31600797	31601186	+	0.270353	0
INn_00001608	chr1	31605037	31607085	+	1.9401	2.16835
INn_00001609	chr1	31613393	31615435	+	6.42023	5.19899
INn_00001610	chr1	31617576	31653754	-	19.2181	15.5276
INn_00001611	chr1	31640997	31641585	-	0	0
INn_00001612	chr1	31674412	31675523	-	1.10518	0.362987
INn_00001614	chr1	31693293	31693463	+	0	0
INn_00001615	chr1	31702308	31713908	-	23.1958	27.8772
INn_00001616	chr1	31715262	31716257	+	10.3659	11.9825
INn_00001617	chr1	31725172	31732509	-	1.54205	1.11395
INn_00001620	chr1	31753193	31753401	+	0.366123	0
INn_00001621	chr1	31757702	31759346	+	0	0
INn_00001623	chr1	31821883	31832704	+	10.6123	11.1905
INn_00001624	chr1	31848259	31848984	+	0.497199	0.184996
INn_00001625	chr1	31875214	31876630	+	23.4715	27.4931
INn_00001626	chr1	31917848	31920222	+	0.450311	0.385454
INn_00001628	chr1	31934742	31947898	-	23.3853	17.0474
INn_00001629	chr1	31992021	31994148	+	196.774	122.096
INn_00001630	chr1	31997186	31998114	+	0.146261	0
INn_00001631	chr1	31999004	31999453	-	0	0
INn_00001632	chr1	32016317	32022958	+	16.2769	14.0516
INn_00001633	chr1	32037485	32040863	+	3.92437	6.95915
INn_00001635	chr1	32057187	32068177	-	28.0042	26.1828
INn_00001636	chr1	32082516	32082893	-	0	0
INn_00001637	chr1	32104339	32121215	+	21.5269	16.724
INn_00001638	chr1	32136967	32139530	+	0	0
INn_00001639	chr1	32141142	32144558	-	386.408	316.518
INn_00001640	chr1	32156998	32159504	-	2.08049	1.71904
INn_00001641	chr1	32166698	32171804	-	7.72323	6.65295
INn_00001644	chr1	32204337	32210310	-	40.8494	40.0544
INn_00001645	chr1	32218680	32219108	-	0	0
INn_00001647	chr1	32234222	32234847	-	0	0
INn_00001648	chr1	32241633	32243071	-	0.787232	0.882704
INn_00001649	chr1	32250989	32257257	+	20.611	17.8014
INn_00001650	chr1	32253461	32254432	+	2.27583	4.10068
INn_00001653	chr1	32271747	32307466	-	38.4661	46.7931
INn_00001655	chr1	32310350	32310855	-	0	0.34442
INn_00001656	chr1	32341221	32341613	-	0	0
INn_00001657	chr1	32347925	32351882	+	93.3725	66.0579
INn_00001658	chr1	32360845	32383896	+	8.97731	8.21953
INn_00001659	chr1	32392073	32395825	+	0.42874	0.445623
INn_00001660	chr1	32435745	32441438	-	17.8227	18.6651
INn_00001661	chr1	32460192	32481973	-	6.84897	7.91357
INn_00001663	chr1	32507244	32507522	+	0.813181	0.103339
INn_00001664	chr1	32555123	32577570	-	24.8436	31.1431
INn_00001665	chr1	32573926	32574978	-	0	0
INn_00001666	chr1	32578068	32578842	-	0.053981	0.141616
INn_00001667	chr1	32616419	32618091	-	41.5549	40.761
INn_00001668	chr1	32619864	32620058	+	8.77053	6.0975
INn_00001669	chr1	32624192	32624642	-	0	0
INn_00001671	chr1	32688657	32694047	-	0.338235	0.523043
INn_00001672	chr1	32697197	32697535	-	2.38379	3.37247
INn_00001673	chr1	32697738	32700266	-	318.927	461.036
INn_00001674	chr1	32728093	32729771	+	0.06389	0.033084
INn_00001675	chr1	32729779	32731685	-	7.25751	4.63045
INn_00001676	chr1	32768113	32769114	-	0	0
INn_00001677	chr1	32785100	32786965	+	13.5189	15.8761
INn_00001678	chr1	32803089	32805128	-	1.44146	0.863096
INn_00001679	chr1	32808597	32809497	-	0	0
INn_00001681	chr1	32834135	32837718	-	0.343413	0.099309
INn_00001682	chr1	32850825	32853881	-	3.6646	2.41871
INn_00001683	chr1	32872993	32873738	-	1.12842	0.678612
INn_00001685	chr1	32930058	32931028	+	0.055237	0
INn_00001686	chr1	32941454	32944735	+	10.3	8.72158
INn_00001687	chr1	32961900	32962672	-	0	0
INn_00001689	chr1	32993710	32994882	+	4.91437	4.0356
INn_00001690	chr1	32995531	33001186	+	14.8571	13.0455
INn_00001691	chr1	33054393	33055597	+	5.57038	3.95145
INn_00001692	chr1	33056246	33061983	+	18.0641	15.6892
INn_00001693	chr1	33067535	33068974	+	1.56119	1.98009
INn_00001695	chr1	33067049	33068578	-	0.464939	0.759034
INn_00001697	chr1	33089252	33089573	+	0	0
INn_00001698	chr1	33100237	33105403	-	8.86766	6.79339
INn_00001699	chr1	33117485	33120455	+	0	0.019409
INn_00001700	chr1	33119518	33120541	-	0	0
INn_00001701	chr1	33128804	33129124	+	0	0
INn_00001702	chr1	33134509	33138159	+	40.7494	37.2734
INn_00001703	chr1	33151010	33153263	+	0	0
INn_00001704	chr1	33154118	33154276	-	0	0
INn_00001705	chr1	33156881	33157692	-	0	0
INn_00001706	chr1	33162389	33162915	-	0	0
INn_00001707	chr1	33164481	33164836	+	16.0514	14.8542
INn_00001708	chr1	33172475	33178796	-	4.53911	2.33693
INn_00001709	chr1	33198431	33201849	-	0	0
INn_00001710	chr1	33257321	33264174	-	21.658	27.5633
INn_00001711	chr1	33266022	33305149	-	11.3607	12.946
INn_00001712	chr1	33292229	33292819	-	0.062658	0.245898
INn_00001714	chr1	33338680	33349309	-	44.4887	47.9359
INn_00001716	chr1	33412798	33413966	+	0.045881	0.121508
INn_00001717	chr1	33412931	33413480	-	0	0
INn_00001718	chr1	33424546	33425380	-	3.65628	3.7247
INn_00001720	chr1	33451072	33452232	-	41.0883	42.8525
INn_00001721	chr1	33459325	33460891	+	0.953763	1.97254
INn_00001722	chr1	33461752	33462756	+	15.6985	11.5996
INn_00001724	chr1	33504561	33513056	-	5.02891	5.22929
INn_00001726	chr1	33513925	33514151	+	1.05397	2.11684
INn_00001727	chr1	33521481	33522021	-	0.42829	0.147089
INn_00001728	chr1	33522462	33525179	-	7.55084	5.03044
INn_00001729	chr1	33567011	33567396	+	3.38607	1.75254
INn_00001731	chr1	33649449	33658469	-	0.840232	0.856872
INn_00001732	chr1	33666845	33667915	-	40.911	43.9688
INn_00001733	chr1	33678829	33681832	-	15.1929	13.0017
INn_00001734	chr1	33687631	33706299	-	65.6111	50.5094
INn_00001735	chr1	33692064	33692865	+	0	0
INn_00001736	chr1	33714724	33734214	-	10.4624	7.73865
INn_00001737	chr1	33735314	33736489	-	0	0
INn_00001739	chr1	33766293	33768722	+	1.37017	1.83046
INn_00001740	chr1	33784262	33786916	-	698.669	567.106
INn_00001742	chr1	33833522	33850085	-	20.9339	23.4794
INn_00001743	chr1	33858792	33887650	-	15.9363	14.0483
INn_00001744	chr1	33903789	33911785	+	26.2646	25.7331
INn_00001745	chr1	33913661	33915446	-	198.183	167.248
INn_00001746	chr1	33925276	33925719	-	0	0
INn_00001750	chr1	33945972	33946322	-	13.7249	19.1469
INn_00001751	chr1	33947984	33965084	+	25.6022	23.6128
INn_00001755	chr1	34005792	34006107	+	0	0
INn_00001756	chr1	34013414	34039724	-	17.5836	14.041
INn_00001757	chr1	34060606	34063156	-	0	0
INn_00001758	chr1	34069128	34080365	-	5.83408	6.6314
INn_00001759	chr1	34081226	34082102	-	0.366335	0
INn_00001760	chr1	34094127	34095498	-	0.155199	0.105071
INn_00001761	chr1	34105994	34106538	+	36.836	22.6421
INn_00001762	chr1	34119120	34119668	-	153.738	211.276
INn_00001763	chr1	34132360	34134967	-	0	0
INn_00001764	chr1	34158430	34160406	-	22.3866	22.1108
INn_00001765	chr1	34164779	34165114	-	0	0
INn_00001766	chr1	34169694	34242971	+	0.779182	0.859704
INn_00001767	chr1	34246004	34250568	-	28.2751	34.5017
INn_00001768	chr1	34252246	34252404	+	0	0
INn_00001769	chr1	34259420	34288178	+	32.5611	31.0032
INn_00001770	chr1	34267454	34267826	+	0	0
INn_00001772	chr1	34304557	34307027	-	0.923659	0.500157
INn_00001773	chr1	34319826	34322050	+	5.11179	5.86263
INn_00001776	chr1	34362537	34378221	-	63.6397	61.62
INn_00001777	chr1	34385744	34387164	+	19.4292	17.1364
INn_00001778	chr1	34415760	34495049	+	36.3442	31.9277
INn_00001779	chr1	34507197	34532475	+	20.6388	16.8733
INn_00001780	chr1	34537945	34539271	+	1.01685	1.04869
INn_00001781	chr1	34569460	34572148	-	11.5926	9.07112
INn_00001782	chr1	34576074	34598305	-	11.2215	8.80117
INn_00001783	chr1	34582911	34594533	+	0	0
INn_00001786	chr1	34612324	34624101	+	26.4434	20.7674
INn_00001788	chr1	34652521	34658656	+	0	0
INn_00001789	chr1	34678276	34695292	+	34.5132	35.0621
INn_00001790	chr1	34690653	34691924	-	0	0.045583
INn_00001791	chr1	34698825	34699368	+	0.114656	0
INn_00001793	chr1	34703818	34713279	+	8.21958	4.87991
INn_00001794	chr1	34712325	34713298	-	13.9868	13.2402
INn_00001795	chr1	34732424	34732844	-	0	0
INn_00001796	chr1	34746665	34779925	+	7.50155	5.57141
INn_00001797	chr1	34779927	34780678	-	0.079108	0.085049
INn_00001798	chr1	34805537	34816536	+	1.2073	1.75045
INn_00001799	chr1	34849617	34850275	+	1.59126	0.86515
INn_00001800	chr1	34849887	34850275	-	0.395896	0.313171
INn_00001801	chr1	34866269	34866709	+	0.282163	0
INn_00001802	chr1	34868613	34869105	-	0.032638	0
INn_00001804	chr1	34921222	34921758	+	0.449125	2.43108
INn_00001805	chr1	34929374	34930009	+	0	0
INn_00001806	chr1	34952933	34953598	+	0	0
INn_00001807	chr1	34975319	34977736	-	4.52796	3.3929
INn_00001808	chr1	35028542	35029159	+	25.0241	24.1174
INn_00001809	chr1	35033640	35035064	+	0.50825	0.18142
INn_00001810	chr1	35040142	35042000	-	148.298	148.338
INn_00001811	chr1	35040818	35041827	+	0	0
INn_00001812	chr1	35054322	35054795	+	0	0
INn_00001815	chr1	35076389	35115847	-	21.5094	16.5521
INn_00001819	chr1	35144354	35151793	-	2.75114	2.26537
INn_00001820	chr1	35173444	35192040	+	40.74	44.6355
INn_00001821	chr1	35192583	35206855	-	3.74397	2.33913
INn_00001822	chr1	35210069	35210464	+	0	0
INn_00001823	chr1	35243783	35246611	+	3.37909	2.98514
INn_00001824	chr1	35246884	35246954	+	0	0
INn_00001825	chr1	35253184	35253358	+	1.32709	0.785069
INn_00001826	chr1	35269736	35270236	-	1.87349	1.72836
INn_00001827	chr1	35277445	35277726	-	0	0
INn_00001828	chr1	35280235	35281255	+	0	0
INn_00001829	chr1	35287167	35287624	+	0	0
INn_00001830	chr1	35312750	35313147	+	0	0
INn_00001833	chr1	35353389	35354151	-	2.21055	2.34338
INn_00001834	chr1	35363280	35371475	-	12.1101	11.2673
INn_00001835	chr1	35374160	35375569	-	1.65319	2.52422
INn_00001836	chr1	35380164	35380563	+	0.297816	0.17584
INn_00001837	chr1	35380252	35380825	-	1.44009	0.894242
INn_00001838	chr1	35385501	35395751	+	0.769625	1.13168
INn_00001839	chr1	35409733	35411867	+	137.263	111.916
INn_00001840	chr1	35424918	35432567	+	18.4759	23.5653
INn_00001841	chr1	35459226	35477166	+	19.3013	19.3167
INn_00001843	chr1	35495932	35496979	-	0	0
INn_00001844	chr1	35506095	35506524	+	15.792	17.9096
INn_00001846	chr1	35559489	35574642	+	39.7868	38.8779
INn_00001847	chr1	35580516	35582809	+	0.560988	2.82406
INn_00001848	chr1	35600499	35630471	-	3.21861	2.12991
INn_00001849	chr1	35640612	35725084	+	52.1139	36.5941
INn_00001854	chr1	35728179	35730816	-	19.7462	21.3212
INn_00001857	chr1	35776941	35777510	-	16.4573	26.5446
INn_00001858	chr1	35793755	35794321	-	13.9966	10.1288
INn_00001859	chr1	35798972	35800094	-	2.72168	3.35108
INn_00001860	chr1	35828103	35828530	-	0	0
INn_00001861	chr1	35832074	35836662	+	2.56833	0.881186
INn_00001863	chr1	35885758	35887691	-	12.9707	9.85134
INn_00001864	chr1	35907388	35907696	-	0	0
INn_00001866	chr1	35916608	35917822	-	6.6836	4.9924
INn_00001867	chr1	35922354	35923885	+	0	0
INn_00001869	chr1	35987595	35989892	+	4.38162	4.26928
INn_00001870	chr1	35998091	36000279	+	0	0.026342
INn_00001871	chr1	36040633	36051687	+	9.59751	15.4244
INn_00001873	chr1	36053678	36054115	-	3.44225	1.93781
INn_00001874	chr1	36061776	36062691	+	0.8621	0.333313
INn_00001875	chr1	36064504	36067530	-	253.946	395.797
INn_00001876	chr1	36068224	36070266	-	1.98912	1.26117
INn_00001877	chr1	36072671	36079170	-	2.13775	1.16429
INn_00001878	chr1	36105679	36108975	+	53.2995	47.5202
INn_00001879	chr1	36110463	36119516	-	3.46521	6.60685
INn_00001880	chr1	36124696	36125064	+	0	0
INn_00001881	chr1	36179587	36203671	+	18.9022	20.2398
INn_00001882	chr1	36209192	36220863	-	20.0848	25.3153
INn_00001883	chr1	36229644	36230211	+	0	0
INn_00001884	chr1	36262663	36264596	+	0	0
INn_00001886	chr1	36270196	36277210	+	13.6827	19.3554
INn_00001887	chr1	36285226	36285820	+	0	0
INn_00001888	chr1	36299502	36301915	+	9.80516	9.93999
INn_00001889	chr1	36312908	36315903	+	0.904485	0.955791
INn_00001890	chr1	36313479	36329225	-	4.8697	4.84513
INn_00001891	chr1	36344804	36345289	+	0	0
INn_00001892	chr1	36346503	36347394	+	0	0
INn_00001893	chr1	36373911	36375115	+	6.20655	4.91176
INn_00001894	chr1	36393004	36402193	+	127.261	162.322
INn_00001895	chr1	36406364	36406633	-	0.556219	0.219262
INn_00001896	chr1	36415877	36416897	+	2.60822	2.363
INn_00001899	chr1	36482537	36483164	-	0	0
INn_00001901	chr1	36500904	36501833	-	0	0
INn_00001902	chr1	36506368	36523991	+	3.39524	2.66468
INn_00001903	chr1	36527205	36529140	-	67.4948	104.624
INn_00001904	chr1	36536412	36565695	-	2.63199	2.46963
INn_00001905	chr1	36584000	36584557	+	0.096121	0.133652
INn_00001907	chr1	36591393	36591770	-	19.0722	36.2367
INn_00001908	chr1	36592545	36594105	-	0	0.076074
INn_00001909	chr1	36603947	36604207	-	0.073295	0
INn_00001910	chr1	36648526	36653900	-	4.42366	3.65383
INn_00001911	chr1	36654597	36654940	-	0	0
INn_00001912	chr1	36680236	36681166	+	0.172831	0
INn_00001913	chr1	36687819	36690849	+	0.597161	1.15075
INn_00001914	chr1	36693829	36697967	-	0.516407	0.158183
INn_00001915	chr1	36694112	36694270	+	0	0
INn_00001917	chr1	36727405	36735253	-	22.4039	17.8256
INn_00001918	chr1	36755248	36767571	+	16.3249	15.6443
INn_00001919	chr1	36796714	36798817	-	7.52894	7.15908
INn_00001920	chr1	36842209	36843909	-	0	0
INn_00001921	chr1	36881647	36885679	+	20.7168	10.9422
INn_00001922	chr1	36906083	36906724	-	0	0
INn_00001923	chr1	36913582	36913983	+	0	0
INn_00001924	chr1	36945176	36948324	+	9.0023	7.27736
INn_00001925	chr1	36955602	36961324	+	7.03344	6.16401
INn_00001926	chr1	36968726	36970524	-	0	0
INn_00001927	chr1	36971680	36978075	+	0.083504	0.074882
INn_00001928	chr1	36985372	36986549	-	0	0
INn_00001929	chr1	36986257	36988223	+	5.57089	4.22405
INn_00001930	chr1	37039522	37040871	+	1.07271	0.12814
INn_00001931	chr1	37065569	37066565	+	0	0
INn_00001932	chr1	37067221	37068032	+	0	0
INn_00001933	chr1	37071620	37079760	+	11.4114	8.98291
INn_00001934	chr1	37097825	37099683	-	0.045862	0.307855
INn_00001935	chr1	37121516	37122569	+	0	0
INn_00001936	chr1	37124477	37125850	-	3.15009	2.00447
INn_00001938	chr1	37189906	37192319	+	0.584077	4.50328
INn_00001939	chr1	37196095	37227113	-	0.71006	0.377331
INn_00001940	chr1	37196221	37197474	-	0.192471	0.229917
INn_00001941	chr1	37244042	37246390	-	42.4367	45.4819
INn_00001942	chr1	37297846	37300060	-	1.11567	3.55955
INn_00001943	chr1	37305364	37308839	+	1.91711	2.06254
INn_00001944	chr1	37308781	37335611	-	20.6296	17.2185
INn_00001945	chr1	37329605	37330325	+	0	0
INn_00001946	chr1	37376516	37376857	+	0	0
INn_00001947	chr1	37380592	37381195	-	54.2127	90.4507
INn_00001948	chr1	37395924	37396634	+	0	0.202483
INn_00001949	chr1	37399297	37402143	+	3.65695	4.21101
INn_00001951	chr1	37419034	37419108	+	50.6747	39.5851
INn_00001952	chr1	37443607	37487087	+	41.3393	47.8528
INn_00001954	chr1	37489636	37490073	-	12.559	18.0507
INn_00001956	chr1	37497475	37497993	+	0	0
INn_00001957	chr1	37500941	37502026	-	16.5448	14.4763
INn_00001958	chr1	37504524	37505243	-	0.782183	0.884167
INn_00001959	chr1	37516790	37517107	+	0	0
INn_00001960	chr1	37565873	37570063	+	0.333439	0.371139
INn_00001961	chr1	37579064	37581146	-	0.596401	0.652757
INn_00001962	chr1	37611531	37655578	+	8.95776	7.71953
INn_00001963	chr1	37659342	37660313	-	15.2611	33.6461
INn_00001964	chr1	37745315	37749250	+	0	0
INn_00001965	chr1	37768880	37770501	-	1.31393	0.905884
INn_00001967	chr1	37778192	37778556	-	0	0
INn_00001968	chr1	37785262	37816152	-	30.0654	22.3306
INn_00001969	chr1	37836700	37843043	-	1.83265	1.90001
INn_00001971	chr1	37866156	37897008	+	28.2876	26.8851
INn_00001972	chr1	37890687	37891058	-	0	0.260414
INn_00001973	chr1	37897243	37897638	-	1.81539	1.98083
INn_00001974	chr1	37907053	37931389	+	10.4493	14.8608
INn_00001975	chr1	37932826	37934319	+	0.170822	0.440683
INn_00001976	chr1	37932826	37933552	-	0	0
INn_00001978	chr1	37948511	37950143	+	2.58356	2.75968
INn_00001979	chr1	37954572	37971209	-	14.7373	13.0888
INn_00001980	chr1	37978853	37991575	-	12.7866	14.1366
INn_00001982	chr1	38030664	38050349	+	11.4216	17.8016
INn_00001983	chr1	38052612	38054202	+	2.35397	2.5531
INn_00001984	chr1	38098204	38111645	+	22.7029	18.1865
INn_00001985	chr1	38115619	38117345	-	0.187082	0.226974
INn_00001986	chr1	38120799	38121107	-	0.982447	0.68922
INn_00001987	chr1	38130794	38135937	+	1.53067	1.86925
INn_00001988	chr1	38139681	38143206	+	0	0.045246
INn_00001989	chr1	38147459	38152463	-	45.0027	36.8563
INn_00001990	chr1	38175170	38194598	-	9.69636	12.0887
INn_00001991	chr1	38236888	38238228	+	0.001333	0.191207
INn_00001992	chr1	38285629	38312151	+	76.2466	80.2118
INn_00001993	chr1	38314433	38316805	+	0.067807	0.0243
INn_00001994	chr1	38339973	38358502	+	18.0483	24.8591
INn_00001996	chr1	38363285	38368617	-	45.2369	42.777
INn_00001997	chr1	38409510	38449231	-	10.5618	10.9049
INn_00002000	chr1	38499810	38514659	+	42.5637	30.9595
INn_00002002	chr1	38530246	38533659	+	0.776025	1.77089
INn_00002003	chr1	38537601	38538782	-	0	0
INn_00002004	chr1	38572124	38586976	+	43.9644	55.1319
INn_00002005	chr1	38588152	38599810	-	13.9173	18.4899
INn_00002007	chr1	38738878	38740983	-	0	0
INn_00002008	chr1	38742367	38743491	+	0	0
INn_00002009	chr1	38762648	38765763	+	4.70159	3.99971
INn_00002010	chr1	38785609	38786779	+	0.091606	0
INn_00002011	chr1	38811486	38812222	+	0.381121	0.924558
INn_00002012	chr1	38825762	38838685	+	21.9544	23.6096
INn_00002013	chr1	38842235	38845347	-	0	0
INn_00002015	chr1	38892376	38915978	-	25.033	17.358
INn_00002016	chr1	38916065	38932525	-	37.5987	31.8669
INn_00002017	chr1	38917368	38924643	+	11.5187	7.98146
INn_00002019	chr1	38945545	38958307	+	28.8435	20.203
INn_00002020	chr1	38959377	38959703	-	0	0
INn_00002021	chr1	38967141	38967722	+	0	0
INn_00002022	chr1	38987489	38988523	-	0.051822	0.055713
INn_00002024	chr1	39024868	39034842	+	21.3871	21.2426
INn_00002025	chr1	39047402	39047683	-	2.12766	1.85599
INn_00002026	chr1	39054011	39056133	+	1.28283	1.45133
INn_00002027	chr1	39060125	39062003	+	4.01426	3.15989
INn_00002028	chr1	39083292	39120051	+	3.87713	4.71029
INn_00002030	chr1	39130223	39140053	-	5.12302	6.53986
INn_00002031	chr1	39142156	39142471	-	0	0.157632
INn_00002034	chr1	39164091	39165344	-	4.03252	3.64836
INn_00002036	chr1	39222469	39254308	+	75.7613	79.6731
INn_00002037	chr1	39225352	39226237	+	0	0.03124
INn_00002038	chr1	39255569	39258040	+	17.9074	18.0704
INn_00002039	chr1	39271282	39272994	-	24.9612	22.8265
INn_00002040	chr1	39285712	39295303	-	53.0249	58.942
INn_00002041	chr1	39300822	39307420	-	0	0
INn_00002043	chr1	39312836	39313288	-	0.170891	0.288528
INn_00002045	chr1	39327649	39327768	-	0	0
INn_00002046	chr1	39328236	39328443	+	0	0
INn_00002047	chr1	39332153	39336194	-	0	0.067099
INn_00002048	chr1	39353328	39355383	-	7.85333	2.54608
INn_00002049	chr1	39358223	39367294	-	28.5721	41.0441
INn_00002050	chr1	39462206	39488205	-	10.2238	7.80189
INn_00002052	chr1	39450809	39452362	-	0	0
INn_00002054	chr1	39493327	39495145	-	2.13236	2.13796
INn_00002055	chr1	39505115	39507209	-	0.023606	0
INn_00002056	chr1	39509151	39513660	-	9.01987	8.8478
INn_00002057	chr1	39536049	39559075	-	14.3551	12.3872
INn_00002058	chr1	39557463	39558237	-	0	0
INn_00002059	chr1	39585612	39599640	+	10.1237	9.28679
INn_00002060	chr1	39603078	39603520	+	0.066216	0
INn_00002061	chr1	39608083	39620666	-	31.6606	20.8191
INn_00002062	chr1	39617578	39619053	+	0	0
INn_00002063	chr1	39627691	39630053	-	34.1591	26.2436
INn_00002064	chr1	39654440	39678624	-	31.4171	12.9122
INn_00002065	chr1	39688936	39709280	+	87.7861	68.3271
INn_00002066	chr1	39712543	39714371	+	2.7241	3.46714
INn_00002067	chr1	39714714	39725892	-	66.7511	83.6575
INn_00002069	chr1	39761255	39762824	-	0.232762	0.118754
INn_00002070	chr1	39764151	39765858	+	139.542	123.993
INn_00002071	chr1	39781899	39790571	-	24.642	18.034
INn_00002073	chr1	39805575	39807575	+	3.35947	3.98118
INn_00002074	chr1	39813932	39815569	-	48.5851	46.9548
INn_00002075	chr1	39824396	39825693	+	2.78259	2.88582
INn_00002076	chr1	39828900	39862511	-	17.4504	16.1022
INn_00002077	chr1	39843012	39843978	-	0	0
INn_00002078	chr1	39885830	39899570	-	82.5247	64.4329
INn_00002080	chr1	39952865	39954153	+	0.322134	0.121894
INn_00002082	chr1	39955588	39955973	+	0	0
INn_00002083	chr1	39956325	39956508	+	0	0
INn_00002085	chr1	39959965	39960305	-	0	0
INn_00002086	chr1	39962762	39963043	+	0	0
INn_00002088	chr1	39985389	40017677	+	26.7652	26.7992
INn_00002089	chr1	40026828	40029011	-	11.6948	8.45658
INn_00002090	chr1	40036716	40037231	-	97.4986	93.7055
INn_00002091	chr1	40047574	40047896	-	0	0
INn_00002092	chr1	40071580	40074279	+	10.3319	3.81369
INn_00002093	chr1	40075979	40078133	-	149.007	131.573
INn_00002094	chr1	40098250	40102237	-	0	0
INn_00002095	chr1	40126045	40127081	-	1.17557	1.0559
INn_00002096	chr1	40129098	40136589	+	6.80128	5.95686
INn_00002097	chr1	40137572	40138021	+	189.217	184.977
INn_00002098	chr1	40138590	40139045	-	0.15134	0.126454
INn_00002099	chr1	40157974	40174457	+	6.11288	6.67036
INn_00002100	chr1	40176340	40177566	+	1.40967	1.44968
INn_00002101	chr1	40210665	40211329	+	0	0
INn_00002102	chr1	40215996	40223907	+	3.40499	1.31929
INn_00002103	chr1	40244857	40256616	+	25.3661	17.1121
INn_00002104	chr1	40265187	40313108	+	35.9605	33.6342
INn_00002105	chr1	40315339	40317633	-	1.7471	1.38291
INn_00002106	chr1	40343122	40345770	+	8.85839	3.04078
INn_00002107	chr1	40351741	40354497	+	14.887	15.0954
INn_00002110	chr1	40383435	40384424	-	38.6622	34.8468
INn_00002111	chr1	40387854	40390993	-	0.538347	0.43331
INn_00002112	chr1	40436796	40453542	+	17.3714	15.5242
INn_00002113	chr1	40455089	40543189	-	16.8877	13.875
INn_00002116	chr1	40535502	40536566	-	0	0
INn_00002117	chr1	40569249	40570526	+	6.03405	5.03311
INn_00002118	chr1	40587921	40588981	+	0.075828	0.434602
INn_00002119	chr1	40589518	40591764	-	6.43244	5.06428
INn_00002120	chr1	40589675	40591725	+	0	0
INn_00002121	chr1	40605632	40606803	+	0	0
INn_00002122	chr1	40630493	40631092	-	0	0
INn_00002123	chr1	40634794	40637527	-	0	0.010546
INn_00002125	chr1	40668060	40670629	+	0	0
INn_00002126	chr1	40679876	40694595	+	10.8626	8.9162
INn_00002128	chr1	40715076	40715636	+	0	0
INn_00002129	chr1	40716752	40718186	-	10.852	14.6413
INn_00002131	chr1	40738757	40740976	-	0.055351	0.607674
INn_00002132	chr1	40746626	40747002	+	0	0
INn_00002133	chr1	40748777	40748941	+	0	0
INn_00002134	chr1	40752977	40753373	-	0	0
INn_00002136	chr1	40779158	40923491	+	4.43074	3.61851
INn_00002137	chr1	40926353	40927580	-	0.240224	0.657397
INn_00002138	chr1	40929085	40929392	+	2.69361	3.06401
INn_00002139	chr1	40929509	40967217	-	7.87791	8.68416
INn_00002141	chr1	41004068	41005520	+	6.40837	5.49625
INn_00002142	chr1	41012352	41020197	+	0.46265	0.23319
INn_00002144	chr1	41042076	41042363	-	0	0
INn_00002145	chr1	41042539	41043108	-	0	0
INn_00002146	chr1	41043300	41043887	-	0	0
INn_00002147	chr1	41056762	41063196	-	0	0
INn_00002148	chr1	41069014	41087369	+	0.047998	0
INn_00002149	chr1	41094717	41096744	-	3.5526	1.50963
INn_00002150	chr1	41099059	41103117	-	5.97555	5.48562
INn_00002151	chr1	41128909	41198938	-	16.6811	13.4421
INn_00002152	chr1	41250919	41271433	+	0	0.126369
INn_00002153	chr1	41271434	41272409	-	0	0
INn_00002155	chr1	41305541	41307201	+	3.06632	2.13426
INn_00002156	chr1	41316512	41319155	-	118.956	136.571
INn_00002157	chr1	41344678	41348209	+	0	0
INn_00002159	chr1	41400734	41401317	-	0	0
INn_00002160	chr1	41407533	41416788	-	0.679066	0.687279
INn_00002161	chr1	41425046	41452326	+	3.65334	2.82741
INn_00002162	chr1	41453709	41454368	+	0.121899	0
INn_00002163	chr1	41474498	41483350	+	18.9239	19.6925
INn_00002164	chr1	41485365	41488585	+	0.049937	0.035871
INn_00002166	chr1	41524291	41526706	+	16.0104	13.3507
INn_00002167	chr1	41543992	41546336	+	2.14313	2.03654
INn_00002168	chr1	41546117	41558587	-	5.68708	3.74354
INn_00002169	chr1	41584039	41591614	+	1.13732	1.04143
INn_00002170	chr1	41600325	41632133	+	0	0
INn_00002171	chr1	41633220	41634752	+	364.719	526.712
INn_00002172	chr1	41636976	41637639	+	0.298333	0.086842
INn_00002173	chr1	41646540	41647523	+	0	0
INn_00002174	chr1	41646544	41648983	-	6.08873	3.18799
INn_00002175	chr1	41660939	41661246	+	0	0
INn_00002177	chr1	41706977	41708275	+	0.128583	0.25466
INn_00002178	chr1	41710540	41712267	+	6.27983	6.191
INn_00002179	chr1	41714108	41726199	-	8.79481	15.5241
INn_00002180	chr1	41747537	41748368	-	0	0
INn_00002181	chr1	41748657	41749133	-	0	0
INn_00002182	chr1	41762948	41763644	-	0	0
INn_00002183	chr1	41782783	41783679	-	31.196	26.8931
INn_00002185	chr1	41814345	41815848	-	0.212545	0.32461
INn_00002186	chr1	41818661	41837316	+	1.64691	3.04447
INn_00002188	chr1	41838767	41839138	+	1.06886	1.42143
INn_00002189	chr1	41851541	41853537	-	11.6849	4.87665
INn_00002190	chr1	41899775	41899952	-	0	0
INn_00002191	chr1	41901406	41902567	+	1.25811	1.36416
INn_00002192	chr1	41910422	42033689	-	18.4612	12.1274
INn_00002193	chr1	42007542	42008185	-	0	0
INn_00002195	chr1	42056587	42057105	-	0.051672	0
INn_00002196	chr1	42097836	42160719	+	48.1153	45.5503
INn_00002198	chr1	42164299	42165276	-	3.31263	3.54665
INn_00002199	chr1	42165473	42166472	+	0.030215	0.187021
INn_00002200	chr1	42168944	42183868	-	5.52734	5.19532
INn_00002201	chr1	42212007	42212523	-	0	0
INn_00002202	chr1	42215375	42217431	-	0.560234	0.796967
INn_00002204	chr1	42234767	42235618	-	0	0
INn_00002205	chr1	42242357	42244884	+	0.127299	0
INn_00002206	chr1	42266099	42266892	+	0	0
INn_00002207	chr1	42272035	42272529	+	0	0
INn_00002208	chr1	42275261	42278715	+	14.2837	11.7136
INn_00002209	chr1	42284430	42285298	-	0.024483	0
INn_00002210	chr1	42305344	42307591	+	8.6319	6.57658
INn_00002211	chr1	42310694	42347634	+	8.78	8.35855
INn_00002212	chr1	42379654	42379908	+	4.51308	7.68238
INn_00002214	chr1	42410603	42412605	-	0.232697	0.185301
INn_00002215	chr1	42423002	42425142	-	0	0
INn_00002216	chr1	42425791	42426280	+	0	0.185149
INn_00002217	chr1	42471068	42473466	+	108.662	93.7587
INn_00002218	chr1	42483631	42519871	+	20.5155	16.6963
INn_00002219	chr1	42530118	42540331	+	59.3274	54.7058
INn_00002221	chr1	42550186	42551767	-	1.20152	1.14904
INn_00002222	chr1	42553785	42553976	+	0	0
INn_00002223	chr1	42556204	42558600	-	0	0
INn_00002224	chr1	42560121	42561599	-	16.1349	8.77564
INn_00002225	chr1	42602679	42607693	+	37.4005	42.58
INn_00002226	chr1	42622876	42629623	+	9.37085	8.32904
INn_00002227	chr1	42622953	42625842	-	1.097	0.718415
INn_00002228	chr1	42624598	42625696	+	1.97584	1.70707
INn_00002229	chr1	42635291	42635893	-	32.0917	14.1933
INn_00002230	chr1	42678908	42807516	+	12.1243	11.5491
INn_00002232	chr1	42817924	42818973	-	0.069259	0
INn_00002233	chr1	42823376	42823714	-	0	0
INn_00002234	chr1	42825986	42828966	+	1.11916	2.21571
INn_00002235	chr1	42833065	42834463	-	0	0.121728
INn_00002236	chr1	42847766	42858042	-	12.3451	10.4691
INn_00002237	chr1	42861053	42890916	-	21.5472	18.2134
INn_00002238	chr1	42864576	42868172	-	0.049975	0.054649
INn_00002239	chr1	42870810	42872325	+	0	0.038308
INn_00002241	chr1	42889708	42889950	+	0	0
INn_00002242	chr1	42892432	42906614	+	10.0877	7.80713
INn_00002245	chr1	42974574	42980943	-	2.60332	3.31682
INn_00002246	chr1	43007005	43008669	+	0	0
INn_00002248	chr1	43020836	43074605	-	8.37905	5.48994
INn_00002250	chr1	43076920	43079617	+	18.0527	12.8976
INn_00002254	chr1	43274256	43274989	+	0	0
INn_00002255	chr1	43289864	43291628	-	1.3064	3.21551
INn_00002256	chr1	43294622	43294993	-	10.6757	28.5995
INn_00002257	chr1	43314460	43377318	-	10.1552	7.90894
INn_00002258	chr1	43330105	43330793	+	0	0
INn_00002259	chr1	43378294	43379088	-	0	0
INn_00002261	chr1	43404468	43407352	-	83.2947	100.44
INn_00002262	chr1	43424274	43431583	-	16.7958	15.9085
INn_00002263	chr1	43445082	43446442	+	0	0.341539
INn_00002264	chr1	43447243	43447800	-	1.80853	3.90244
INn_00002265	chr1	43447901	43449855	-	0.308611	1.60229
INn_00002266	chr1	43476088	43478930	+	51.7181	50.6528
INn_00002267	chr1	43486240	43488699	+	239.274	190.809
INn_00002268	chr1	43491372	43492415	-	13.8625	12.3398
INn_00002270	chr1	43525203	43527883	+	16.9256	15.0708
INn_00002271	chr1	43539210	43539955	-	0.097612	5.45958
INn_00002272	chr1	43548634	43549511	-	0	0.090207
INn_00002273	chr1	43551594	43552567	-	0	0
INn_00002274	chr1	43556930	43557763	-	0	0.84673
INn_00002275	chr1	43559819	43561206	+	0.096452	0.0628
INn_00002276	chr1	43569165	43569954	+	0	0
INn_00002278	chr1	43573013	43573403	-	0	0
INn_00002280	chr1	43616924	43617493	-	0	0
INn_00002281	chr1	43618906	43620355	+	0	0
INn_00002282	chr1	43631550	43632657	+	0	0
INn_00002283	chr1	43640738	43640989	-	0	0
INn_00002284	chr1	43665344	43679037	+	44.4287	39.5847
INn_00002285	chr1	43680755	43683004	-	0	0.22958
INn_00002286	chr1	43683655	43686251	+	0.078567	0.264852
INn_00002287	chr1	43688722	43690053	+	0.997395	0.82587
INn_00002288	chr1	43694848	43695285	+	0	0
INn_00002289	chr1	43706582	43707299	+	0	0
INn_00002290	chr1	43727799	43728850	-	10.7848	9.12735
INn_00002291	chr1	43730215	43733040	-	5.33142	5.48279
INn_00002292	chr1	43730910	43731139	+	0	0
INn_00002294	chr1	43799059	43800406	-	0	0
INn_00002295	chr1	43819367	43820504	-	28.1387	21.2733
INn_00002297	chr1	43852260	43854152	+	3.87414	4.09581
INn_00002299	chr1	43856916	43857670	+	0	0
INn_00002300	chr1	43877508	43895435	+	0	0
INn_00002302	chr1	43896150	43896893	-	0.072091	0.232512
INn_00002303	chr1	43903219	43903551	+	0	0
INn_00002304	chr1	43921298	43928519	+	47.0838	28.8506
INn_00002305	chr1	43928170	43928644	-	9.59809	6.39183
INn_00002306	chr1	43944096	43954613	+	89.4752	79.9024
INn_00002307	chr1	43955250	43956263	+	0	0
INn_00002308	chr1	43955301	43956093	-	0	0
INn_00002311	chr1	43968786	43971792	-	162.515	125.697
INn_00002312	chr1	43975428	44002922	-	28.6908	21.8771
INn_00002314	chr1	44087366	44089409	+	0	0
INn_00002316	chr1	44103097	44103695	+	0	0
INn_00002317	chr1	44103352	44103674	-	0	0
INn_00002318	chr1	44112086	44117710	-	12.3072	3.09343
INn_00002319	chr1	44117786	44118070	+	8.10302	1.86747
INn_00002321	chr1	44178357	44183768	+	24.5783	26.1003
INn_00002322	chr1	44239054	44244834	+	24.3681	22.2796
INn_00002323	chr1	44257057	44257857	+	0	0
INn_00002324	chr1	44269297	44269709	+	0	0
INn_00002326	chr1	44271035	44275044	-	0	0
INn_00002327	chr1	44291307	44293922	-	37.8811	33.3136
INn_00002328	chr1	44311628	44313016	+	16.8512	15.8646
INn_00002329	chr1	44326882	44329443	+	4.88678	3.04933
INn_00002330	chr1	44335462	44336349	-	241.26	192.367
INn_00002331	chr1	44338718	44377085	+	26.0116	20.3726
INn_00002332	chr1	44378365	44383048	-	8.44412	10.6651
INn_00002333	chr1	44389269	44389543	-	0	0
INn_00002334	chr1	44396456	44396731	+	0	0
INn_00002335	chr1	44423288	44424540	-	0.080247	0
INn_00002336	chr1	44436988	44439507	+	31.4177	32.595
INn_00002337	chr1	44456916	44458269	-	0.336707	0.383285
INn_00002338	chr1	44472091	44474629	-	4.55831	3.58003
INn_00002339	chr1	44477186	44477746	+	0	0
INn_00002341	chr1	44496385	44497151	+	0	0
INn_00002342	chr1	44510478	44512293	-	0	0.034831
INn_00002345	chr1	44553458	44569383	+	28.7011	29.268
INn_00002347	chr1	44605837	44608336	-	0.062007	0
INn_00002348	chr1	44607410	44607734	+	0.404878	0.392109
INn_00002349	chr1	44627822	44630736	+	62.3554	55.1777
INn_00002350	chr1	44634031	44634305	+	0	0
INn_00002351	chr1	44639152	44639724	-	0	0
INn_00002352	chr1	44647800	44648747	+	0	0
INn_00002353	chr1	44711266	44721756	+	14.4276	12.8988
INn_00002354	chr1	44715047	44719165	+	0.305313	0.326924
INn_00002356	chr1	44759673	44760597	+	56.1717	65.0772
INn_00002358	chr1	44764562	44765712	-	0	0.100197
INn_00002359	chr1	44786846	44787705	+	0	0
INn_00002361	chr1	44813591	45007450	+	4.24523	4.67561
INn_00002363	chr1	45030148	45031795	+	0.146946	0.103892
INn_00002364	chr1	45053626	45056930	+	1.83871	2.60717
INn_00002365	chr1	45079285	45084339	+	2.99407	4.54078
INn_00002367	chr1	45146337	45149366	-	9.59815	6.12222
INn_00002369	chr1	45200608	45200789	-	0	0
INn_00002371	chr1	45256638	45262886	+	33.2688	25.5454
INn_00002372	chr1	45282864	45285803	+	10.3083	9.62281
INn_00002374	chr1	45343805	45346663	+	2.68565	1.41566
INn_00002375	chr1	45357212	45358044	+	0	0
INn_00002376	chr1	45359758	45363769	-	1.56564	1.18123
INn_00002377	chr1	45387747	45388085	+	0	0
INn_00002378	chr1	45400849	45403011	+	0	0
INn_00002379	chr1	45420436	45421579	+	0.204213	0
INn_00002380	chr1	45421159	45428502	-	0.030048	0.090295
INn_00002381	chr1	45435272	45444517	-	18.6031	17.6234
INn_00002382	chr1	45466563	45466943	-	0	0
INn_00002383	chr1	45467718	45468623	-	0	0
INn_00002384	chr1	45471496	45473286	+	1.5299	0.891508
INn_00002385	chr1	45497862	45503066	+	95.1385	120.051
INn_00002386	chr1	45518509	45519270	-	0.456346	0.320098
INn_00002387	chr1	45519553	45521901	-	0.802285	0.516161
INn_00002388	chr1	45525001	45527791	-	0	0
INn_00002389	chr1	45530124	45534432	-	0	0
INn_00002391	chr1	45534507	45535426	-	0	0
INn_00002392	chr1	45537786	45538313	+	0	0
INn_00002393	chr1	45541591	45542523	+	0	0
INn_00002394	chr1	45609362	45609890	+	0.798588	0.904663
INn_00002395	chr1	45614322	45614621	-	0	0
INn_00002396	chr1	45630067	45665100	+	11.6188	8.76318
INn_00002398	chr1	45665398	45667971	+	1.07848	0.414962
INn_00002400	chr1	45715908	45717030	-	0.690621	1.01633
INn_00002401	chr1	45718189	45724044	-	2.36465	2.56323
INn_00002402	chr1	45729591	45729798	-	0	0
INn_00002404	chr1	45746506	45746848	+	0	0
INn_00002405	chr1	45755047	45756667	+	0	0
INn_00002406	chr1	45786003	45852435	-	0.273185	0.423825
INn_00002407	chr1	45807731	45808633	-	0.788791	0.924227
INn_00002409	chr1	45833319	45835049	-	0.349066	0.705548
INn_00002410	chr1	45835320	45837203	-	5.09944	4.71537
INn_00002412	chr1	45932279	45936734	+	3.70103	5.11249
INn_00002415	chr1	46009628	46011723	-	64.5625	53.6673
INn_00002416	chr1	46013405	46014034	+	0.058078	0
INn_00002417	chr1	46014585	46021337	-	11.0288	11.7575
INn_00002418	chr1	46063505	46069684	+	20.3854	24.5627
INn_00002419	chr1	46069702	46074391	-	2.7824	5.21987
INn_00002421	chr1	46082113	46083149	-	5.50604	8.86691
INn_00002422	chr1	46088410	46089385	-	2.51456	3.58815
INn_00002423	chr1	46110888	46115099	-	3.08086	3.45504
INn_00002424	chr1	46151622	46154829	+	31.6778	50.0546
INn_00002425	chr1	46162358	46164057	-	7.86357	10.828
INn_00002426	chr1	46188932	46191037	+	10.2165	10.6393
INn_00002427	chr1	46193444	46196322	-	0.522143	0.326737
INn_00002428	chr1	46195988	46196322	+	0	0
INn_00002429	chr1	46198756	46206820	-	102.625	81.65
INn_00002430	chr1	46215000	46223630	+	99.2393	82.2247
INn_00002431	chr1	46236060	46236926	-	0	0
INn_00002432	chr1	46259369	46259917	+	0	0
INn_00002433	chr1	46260293	46262647	+	9.04175	11.8037
INn_00002434	chr1	46293847	46294854	+	0	0
INn_00002435	chr1	46330264	46330694	+	0	0
INn_00002436	chr1	46334299	46335282	+	0	0
INn_00002440	chr1	46406086	46428771	-	30.3843	25.5791
INn_00002442	chr1	46459089	46463070	-	8.75868	8.60159
INn_00002443	chr1	46481972	46483694	+	0.977	0.600507
INn_00002444	chr1	46484615	46484775	+	0.329808	0.179078
INn_00002447	chr1	46573226	46575826	-	4.75212	4.02607
INn_00002450	chr1	46606990	46650615	+	10.0773	7.33214
INn_00002451	chr1	46725258	46725410	-	0	0
INn_00002452	chr1	46725671	46757468	-	24.5628	23.663
INn_00002453	chr1	46764861	46767083	-	0.724353	0.88624
INn_00002455	chr1	46768765	46778824	-	197.279	172.415
INn_00002456	chr1	46788774	46801131	+	0	0
INn_00002457	chr1	46805910	46822788	+	13.8166	12.5658
INn_00002458	chr1	46824287	46826128	-	1.62391	1.71716
INn_00002459	chr1	46834118	46843652	+	10.5259	11.6093
INn_00002460	chr1	46839588	46840257	-	1.35716	1.11453
INn_00002461	chr1	46848811	46851035	-	0	0
INn_00002462	chr1	46878826	46879347	-	0	0
INn_00002466	chr1	46926246	46927348	-	0	0
INn_00002468	chr1	46935351	46938280	+	35.5215	47.1454
INn_00002469	chr1	46989543	46995646	+	3.99811	5.97511
INn_00002470	chr1	46997964	47013672	-	207.161	225.09
INn_00002471	chr1	47018549	47019419	-	0.157437	0.421274
INn_00002475	chr1	47135086	47170467	+	21.8613	36.3981
INn_00002478	chr1	47244135	47255641	+	18.0271	14.5877
INn_00002480	chr1	47266763	47268337	+	0	0
INn_00002481	chr1	47287073	47289856	+	10.9221	11.5236
INn_00002483	chr1	47303335	47305314	+	2.76502	2.31293
INn_00002485	chr1	47335481	47337466	+	44.641	86.6883
[truncated: 32,968 more rows]

## Sheet: Sheet2
Table S2. Genomic Loci and gene expression in the Australian lotus genome.
Gene ID	Chr	Start	End	Strand	FPKM_sample1	FPKM_sample2
ANn_00040552	chr1	90315	91890	+	8.55983	6.01691
ANn_00040554	chr1	92312	103297	-	0	0
ANn_00040555	chr1	196199	197039	-	6.13581	7.98403
ANn_00040556	chr1	218933	220257	-	3.74768	3.89745
ANn_00040557	chr1	226756	233971	-	0.03617	0.113726
ANn_00040558	chr1	245965	246657	+	0.384927	0.677497
ANn_00040559	chr1	253474	254907	+	0.286033	0.056177
ANn_00040560	chr1	270079	270516	+	12.6023	4.73451
ANn_00040562	chr1	324260	324686	+	0	0
ANn_00040563	chr1	345074	345883	-	0	0
ANn_00040565	chr1	345970	347137	+	14.7736	11.2489
ANn_00040566	chr1	378020	378445	+	6.37304	18.2036
ANn_00040567	chr1	397453	398633	+	0.106054	0.533858
ANn_00040568	chr1	440155	440470	+	0.049926	0.355799
ANn_00040569	chr1	455147	553504	+	1.45557	6.83361
ANn_00040570	chr1	497569	497993	-	113.276	251.438
ANn_00040571	chr1	534340	541228	-	0.805084	0.581346
ANn_00040572	chr1	551464	552273	-	0.683745	0.290725
ANn_00040573	chr1	578874	579781	+	16.8976	13.5287
ANn_00040574	chr1	580902	581579	+	2.15994	6.24011
ANn_00040575	chr1	582649	583521	+	38.1817	30.1614
ANn_00040576	chr1	603610	609148	-	7.68654	2.35768
ANn_00040577	chr1	722244	722591	-	1.01609	1.03486
ANn_00040578	chr1	744163	745258	+	2.75197	3.26424
ANn_00040579	chr1	771351	774237	+	0	0.098031
ANn_00040580	chr1	780499	783763	-	43.9791	171.907
ANn_00040582	chr1	792283	907988	+	8.72278	17.1982
ANn_00040584	chr1	835489	836874	-	215.902	263.04
ANn_00040585	chr1	911091	913407	-	0	0
ANn_00040587	chr1	938706	942366	-	189.499	184.407
ANn_00040589	chr1	970455	972269	-	0.244483	0.107939
ANn_00040591	chr1	1059456	1069817	+	13.1952	2.83231
ANn_00040592	chr1	1087192	1089215	-	8.5209	52.2486
ANn_00040593	chr1	1090984	1092607	+	0.133731	4.90424
ANn_00040595	chr1	1103959	1105976	+	1.54727	0.096595
ANn_00040596	chr1	1139260	1158072	-	11.9677	11.84
ANn_00040597	chr1	1159547	1159894	-	12.3015	9.79919
ANn_00040600	chr1	1190337	1199863	+	0.077355	0.066601
ANn_00040601	chr1	1226551	1228142	+	0	0
ANn_00040602	chr1	1232684	1233175	-	4.13625	5.73402
ANn_00040603	chr1	1251625	1257359	-	23.7377	9.46238
ANn_00040604	chr1	1337778	1338207	+	8.67364	1.87442
ANn_00040605	chr1	1337800	1338084	-	12.8152	1.31555
ANn_00040606	chr1	1345738	1347008	-	0.073202	0.091705
ANn_00040607	chr1	1397719	1401680	+	2.66448	1.34808
ANn_00040608	chr1	1424684	1426779	+	6.84721	3.99587
ANn_00040610	chr1	1453918	1455501	+	37.8561	40.1802
ANn_00040612	chr1	1456390	1466264	-	17.731	17.8148
ANn_00040613	chr1	1481364	1482553	-	13.0087	16.3377
ANn_00040614	chr1	1491966	1520131	+	4.55669	7.86351
ANn_00040615	chr1	1530281	1530480	-	16.2345	10.7453
ANn_00040616	chr1	1547032	1558451	-	1.09505	1.48262
ANn_00040619	chr1	1569256	1570416	-	1.37546	0.913332
ANn_00040620	chr1	1590511	1619258	+	0.346205	0.070627
ANn_00040621	chr1	1621438	1622516	+	0.076821	0.12083
ANn_00040623	chr1	1636592	1655507	-	178.952	143.823
ANn_00040624	chr1	1758411	1758710	-	6.6113	2.45952
ANn_00040625	chr1	1785542	1786554	+	0.840477	0.51285
ANn_00040626	chr1	1822289	1822609	-	0.223789	0.054397
ANn_00040627	chr1	1859692	1860309	+	0	0.333375
ANn_00040629	chr1	1903834	1908161	-	0	0
ANn_00040630	chr1	1909243	1972737	+	26.4628	18.8819
ANn_00040634	chr1	1980592	1980925	+	16.2795	26.5286
ANn_00040635	chr1	2003127	2004910	+	0.529403	6.46222
ANn_00040636	chr1	2030853	2033884	+	0	0.330353
ANn_00040637	chr1	2030970	2031609	-	2.70782	7.12333
ANn_00040638	chr1	2045836	2049083	+	0	0
ANn_00040639	chr1	2057616	2057903	-	0	0
ANn_00040640	chr1	2066236	2070099	+	8.86252	11.7988
ANn_00040641	chr1	2093304	2115575	-	75.3994	26.1459
ANn_00040642	chr1	2136809	2143629	+	45.6172	36.8879
ANn_00040643	chr1	2157362	2161653	+	1.20733	1.56401
ANn_00040644	chr1	2194405	2197905	-	0.064701	0
ANn_00040645	chr1	2245964	2246685	-	6.49586	6.78541
ANn_00040646	chr1	2272063	2272556	+	0.173496	0.141095
ANn_00040647	chr1	2377527	2380474	-	0	0
ANn_00040648	chr1	2382392	2382722	+	0.8537	0.70936
ANn_00040649	chr1	2384354	2386395	+	0.03272	0
ANn_00040650	chr1	2407718	2413986	-	18.4013	20.4159
ANn_00040651	chr1	2413235	2425280	+	0.172752	0.237884
ANn_00040652	chr1	2421971	2423566	-	15.1988	8.9209
ANn_00040653	chr1	2464094	2484312	+	17.9726	12.4978
ANn_00040654	chr1	2506291	2509587	-	2.51063	1.63266
ANn_00040656	chr1	2525981	2527147	+	4.57395	2.82565
ANn_00040657	chr1	2552555	2552707	-	2.87944	1.7721
ANn_00040658	chr1	2580669	2582361	+	8.58958	12.6408
ANn_00040659	chr1	2590575	2593441	-	0	0
ANn_00040661	chr1	2594867	2598070	-	9.12633	7.06306
ANn_00040662	chr1	2609265	2610431	+	0	0
ANn_00040663	chr1	2644633	2664687	+	0	0
ANn_00040664	chr1	2685859	2701587	+	19.0877	18.2345
ANn_00040666	chr1	2695860	2696159	-	10.0834	15.2449
ANn_00040668	chr1	2809574	2810225	-	0.083469	0.071279
ANn_00040669	chr1	2815735	2816511	+	2.06789	2.70001
ANn_00040670	chr1	2828291	2845337	+	51.8087	52.9593
ANn_00040673	chr1	2849626	2852405	+	202.367	310.875
ANn_00040674	chr1	2851645	2853839	-	0.05434	0.049885
ANn_00040675	chr1	2889798	2891171	-	0	0
ANn_00040676	chr1	2899690	2903684	+	0	0
ANn_00040677	chr1	2916425	2917015	-	48.2205	18.6088
ANn_00040678	chr1	2919636	2922969	-	3.3809	2.95147
ANn_00040679	chr1	2937967	2939973	+	2.08338	0.990387
ANn_00040680	chr1	2953800	2957468	-	4.09972	2.10272
ANn_00040681	chr1	2979862	2980242	+	3.37571	3.16842
ANn_00040682	chr1	2983120	2999191	-	0.049648	1.44273
ANn_00040683	chr1	2996717	2997261	+	0	0
ANn_00040684	chr1	3011952	3049675	+	9.05762	5.12276
ANn_00040685	chr1	3055179	3061130	-	187.735	168.45
ANn_00040686	chr1	3068769	3070872	-	0	0.082582
ANn_00040687	chr1	3127669	3150395	+	0.98549	1.36037
ANn_00040688	chr1	3138801	3140163	-	24.1762	34.638
ANn_00040689	chr1	3153743	3184264	-	5.77984	8.05599
ANn_00040690	chr1	3188504	3191582	-	12.7954	11.0824
ANn_00040691	chr1	3197857	3204019	+	4.46603	10.0239
ANn_00040693	chr1	3240742	3242247	+	1.47335	0.209309
ANn_00040694	chr1	3246818	3258890	+	27.4978	22.3946
ANn_00040695	chr1	3265750	3269144	+	0.394079	0.653552
ANn_00040696	chr1	3270219	3278613	-	9.08464	5.53072
ANn_00040697	chr1	3271003	3272471	+	0.268501	0
ANn_00040698	chr1	3305075	3408040	-	0	0
ANn_00040700	chr1	3419428	3420015	-	11.9626	18.6304
ANn_00040701	chr1	3458902	3459205	-	12.6948	6.50076
ANn_00040702	chr1	3460205	3460888	-	0.765892	0.150045
ANn_00040703	chr1	3468174	3468506	-	17.1822	26.23
ANn_00040704	chr1	3478328	3481768	-	4.90007	1.19419
ANn_00040705	chr1	3478994	3479217	+	0	0
ANn_00040706	chr1	3480284	3480778	-	1.97729	2.14616
ANn_00040707	chr1	3496888	3499500	-	4.35108	5.58618
ANn_00040708	chr1	3537097	3537669	+	0.435432	0.541805
ANn_00040709	chr1	3594186	3595583	-	122.389	53.239
ANn_00040710	chr1	3608259	3609186	+	41.1283	15.0877
ANn_00040711	chr1	3620371	3621651	-	18.22	18.2514
ANn_00040714	chr1	3706948	3707368	-	102.214	56.4516
ANn_00040715	chr1	3729846	3733408	+	2.03338	0.329678
ANn_00040716	chr1	3743661	3745257	-	0.712475	0.784246
ANn_00040717	chr1	3782636	3784294	-	26.1521	10.6927
ANn_00040719	chr1	3783170	3783415	-	0	0
ANn_00040720	chr1	3790302	3793597	+	32.1748	32.5215
ANn_00040721	chr1	3817424	3824811	+	4.27395	5.22188
ANn_00040722	chr1	3848188	3849586	+	15.017	5.0871
ANn_00040723	chr1	3851059	3851400	-	1.21006	0.245344
ANn_00040724	chr1	3861099	3861431	+	1390.9	301.189
ANn_00040726	chr1	3865927	3880400	-	1175.83	306.768
ANn_00040727	chr1	3898779	3899111	+	21.6885	17.6459
ANn_00040729	chr1	3904099	3904989	-	30.4678	32.9934
ANn_00040730	chr1	3921057	3924525	+	6.22251	10.0471
ANn_00040732	chr1	3927971	3946240	-	0.144821	0.168018
ANn_00040733	chr1	3939885	3941234	+	4.90061	5.56516
ANn_00040736	chr1	3955233	3958881	-	0	0
ANn_00040737	chr1	3965606	3977282	-	28.3039	10.739
ANn_00040739	chr1	3989773	3990927	+	0.537894	0.566693
ANn_00040741	chr1	3995727	4067537	-	0.797857	1.08522
ANn_00040742	chr1	4029380	4031305	-	0.295973	0.371133
ANn_00040743	chr1	4067982	4084859	+	1.22632	2.68892
ANn_00040744	chr1	4092183	4098747	+	15.8927	30.7014
ANn_00040745	chr1	4114211	4114882	-	13.8528	4.42334
ANn_00040746	chr1	4132797	4135399	-	0	0
ANn_00040747	chr1	4142413	4142676	+	0.160449	0.07737
ANn_00040748	chr1	4165083	4169717	-	0	0
ANn_00040749	chr1	4172923	4174208	-	0.270149	0.148305
ANn_00040750	chr1	4183159	4183284	+	2.21013	4.75178
ANn_00040751	chr1	4183324	4183557	-	1.0273	2.23051
ANn_00040752	chr1	4187659	4187976	-	10.8241	19.8537
ANn_00040753	chr1	4209856	4212412	-	0.384388	0.286712
ANn_00040754	chr1	4217222	4217618	-	0.269965	0.320474
ANn_00040755	chr1	4218707	4222561	+	0.385488	0.755875
ANn_00040756	chr1	4223217	4223664	+	0.079017	0
ANn_00040757	chr1	4227393	4229101	+	0.312802	0
ANn_00040758	chr1	4252390	4258932	+	59.471	52.5893
ANn_00040759	chr1	4258622	4258980	-	52.0695	64.0533
ANn_00040760	chr1	4259798	4260668	-	0	0
ANn_00040761	chr1	4278045	4278314	-	3.16963	2.44916
ANn_00040762	chr1	4334271	4348031	-	0	0
ANn_00040763	chr1	4342371	4343048	+	37.779	11.2018
ANn_00040764	chr1	4372000	4374308	-	1.24028	0.912178
ANn_00040765	chr1	4412512	4428517	+	0	0
ANn_00040767	chr1	4432168	4432560	-	363.698	560.399
ANn_00040769	chr1	4439243	4442146	+	118.48	83.3912
ANn_00040770	chr1	4451442	4451834	+	0.745476	0.452907
ANn_00040772	chr1	4451968	4480821	+	32.5416	34.8805
ANn_00040774	chr1	4485230	4487648	+	1.64578	15.4092
ANn_00040775	chr1	4489752	4491529	-	9.44524	13.6108
ANn_00040777	chr1	4512545	4513331	-	13.461	11.1794
ANn_00040779	chr1	4530927	4533133	-	4.50431	5.38178
ANn_00040780	chr1	4534015	4535806	-	11.3142	3.2041
ANn_00040781	chr1	4582231	4588092	-	4.12424	11.2964
ANn_00040782	chr1	4600133	4621256	+	34.102	13.7673
ANn_00040784	chr1	4628213	4629004	-	0.298276	0
ANn_00040785	chr1	4651023	4652617	+	22.7026	21.8004
ANn_00040786	chr1	4683521	4683826	-	25.2219	41.7197
ANn_00040789	chr1	4690554	4691798	+	0.096008	0.61197
ANn_00040790	chr1	4703732	4705500	-	26.2344	27.4247
ANn_00040791	chr1	4706021	4709287	+	3.3828	4.96125
ANn_00040792	chr1	4718333	4722644	+	6.99025	9.71053
ANn_00040793	chr1	4740660	4743101	+	0.644016	0.047105
ANn_00040794	chr1	4745140	4745472	-	45.6516	43.0073
ANn_00040795	chr1	4749408	4755753	-	0.701031	0
ANn_00040797	chr1	4758119	4772480	-	0.923765	0
ANn_00040798	chr1	4788977	4795164	-	2.62839	3.0137
ANn_00040799	chr1	4803112	4806229	+	19.7557	24.3677
ANn_00040800	chr1	4804149	4804960	-	0	0
ANn_00040801	chr1	4812602	4813063	+	0	0
ANn_00040802	chr1	4833664	4834035	+	0	0
ANn_00040803	chr1	4859407	4860453	-	10.2163	10.0267
ANn_00040804	chr1	4900345	4902956	-	0.259075	0.236093
ANn_00040805	chr1	4916927	4917127	-	5.94243	2.35677
ANn_00040806	chr1	4932931	4939413	+	16.201	12.2429
ANn_00040808	chr1	4947796	4951380	+	9.73232	3.17814
ANn_00040811	chr1	4951739	4958010	-	15.02	12.1361
ANn_00040812	chr1	4975591	4977643	-	1.67725	1.22818
ANn_00040813	chr1	4979712	4980758	+	0	0.079426
ANn_00040814	chr1	4996094	4998988	-	61.8536	52.9926
ANn_00040815	chr1	5007458	5009027	-	16.9148	7.29034
ANn_00040816	chr1	5009753	5012589	+	58.0597	73.6644
ANn_00040818	chr1	5032354	5033811	-	3.02844	0.179709
ANn_00040819	chr1	5048976	5117239	-	2.18896	0.484609
ANn_00040820	chr1	5162385	5167274	-	1.10013	0
ANn_00040821	chr1	5202777	5204479	+	1.44294	1.22581
ANn_00040822	chr1	5206783	5207625	-	1.17606	1.31208
ANn_00040823	chr1	5212133	5289076	-	38.8321	22.5709
ANn_00040824	chr1	5332961	5334222	+	0.359174	0.071605
ANn_00040825	chr1	5348032	5349228	-	0.264682	0.295309
ANn_00040827	chr1	5360272	5365963	-	2.0335	0.088723
ANn_00040828	chr1	5398388	5398780	+	96.2566	88.105
ANn_00040829	chr1	5412932	5413267	-	37.0319	28.0416
ANn_00040830	chr1	5417196	5419153	+	4.10133	2.38915
ANn_00040831	chr1	5423574	5425734	-	0.033227	0.014712
ANn_00040832	chr1	5428208	5428884	-	55.544	30.5149
ANn_00040833	chr1	5466203	5466521	+	0.383348	0.047117
ANn_00040834	chr1	5503805	5504197	-	6.42897	10.0089
ANn_00040836	chr1	5533810	5535183	-	39.9518	46.9435
ANn_00040837	chr1	5545303	5547353	+	0	0
ANn_00040838	chr1	5634970	5636202	+	6.1862	5.50382
ANn_00040839	chr1	5635784	5636006	-	0.267576	0.210636
ANn_00040840	chr1	5651900	5655202	-	19.9129	12.2545
ANn_00040841	chr1	5653090	5653486	+	9.53082	9.93872
ANn_00040842	chr1	5653816	5655028	+	21.7952	18.0469
ANn_00040843	chr1	5657867	5658739	+	0	0
ANn_00040845	chr1	5688382	5690739	+	7.5512	9.83743
ANn_00040846	chr1	5709058	5709402	+	0.155365	0
ANn_00040847	chr1	5739738	5755922	-	6.71249	5.4151
ANn_00040848	chr1	5753575	5754853	+	3.60931	2.33164
ANn_00040849	chr1	5793386	5793815	+	0.802679	0.366672
ANn_00040850	chr1	5801873	5804581	+	1.46837	1.62908
ANn_00040853	chr1	5875584	5880548	+	0.053769	0.279715
ANn_00040855	chr1	5875956	5879950	-	0.178489	0
ANn_00040856	chr1	5888759	5890312	+	0.078168	0
ANn_00040857	chr1	5895609	5904727	+	38.6974	21.3809
ANn_00040858	chr1	5915484	5916586	-	23.7108	26.211
ANn_00040859	chr1	5916859	5917325	-	0.271808	0.485748
ANn_00040860	chr1	5922707	5923973	+	4.23426	2.45484
ANn_00040862	chr1	5938771	5939228	+	0.271274	0.080499
ANn_00040863	chr1	5943654	5957327	+	174.019	185.435
ANn_00040864	chr1	5965865	5966597	+	52.6388	91.5939
ANn_00040866	chr1	5967171	5967728	+	6.70054	9.50625
ANn_00040868	chr1	6011473	6015492	-	2.74233	0.355109
ANn_00040869	chr1	6051587	6053292	+	4.39727	3.28488
ANn_00040871	chr1	6096718	6097710	+	0.259003	0.06199
ANn_00040872	chr1	6100393	6105143	-	55.1859	51.4595
ANn_00040873	chr1	6142526	6145362	+	5.76243	5.04141
ANn_00040874	chr1	6150410	6153067	-	0.165446	0.287407
ANn_00040875	chr1	6212581	6213220	+	5.08333	6.02935
ANn_00040876	chr1	6215394	6217785	-	25.1918	12.0901
ANn_00040877	chr1	6228692	6231779	-	1.20601	0.831734
ANn_00040878	chr1	6231196	6231851	+	1.74586	0.366999
ANn_00040880	chr1	6245664	6247827	+	2.1601	12.1409
ANn_00040881	chr1	6248372	6248962	-	6.43417	11.4513
ANn_00040882	chr1	6257051	6261141	+	31.1543	30.9439
ANn_00040884	chr1	6285587	6288715	+	0.247023	0.034841
ANn_00040886	chr1	6290719	6320945	-	1.21921	0.944735
ANn_00040887	chr1	6358890	6360449	-	40.6977	28.9816
ANn_00040889	chr1	6367367	6367798	+	203.327	118.561
ANn_00040890	chr1	6368268	6368437	+	8.77662	9.99776
ANn_00040891	chr1	6371877	6410547	-	1.12095	0.413368
ANn_00040892	chr1	6439167	6443665	-	2.56612	4.54837
ANn_00040893	chr1	6447175	6448806	+	19.5327	11.8396
ANn_00040894	chr1	6458266	6459300	+	28.8788	26.399
ANn_00040896	chr1	6475253	6475815	-	0.018995	0
ANn_00040897	chr1	6479425	6479744	-	6.32958	6.6
ANn_00040898	chr1	6483991	6484263	+	39.5867	51.7983
ANn_00040899	chr1	6497339	6497635	+	0	0
ANn_00040900	chr1	6522330	6525716	-	0.02823	0.207327
ANn_00040901	chr1	6527614	6529224	+	20.5343	10.5542
ANn_00040902	chr1	6528321	6528732	-	0	0
ANn_00040903	chr1	6534577	6536962	+	0	0
ANn_00040904	chr1	6548944	6549683	-	0	0.054413
ANn_00040905	chr1	6560686	6561592	-	0.052591	0
ANn_00040906	chr1	6582146	6587110	+	3.10182	3.27646
ANn_00040907	chr1	6588683	6589257	-	5.39512	4.57672
ANn_00040908	chr1	6592876	6593160	+	15.6049	16.1238
ANn_00040909	chr1	6593547	6598417	+	2.14915	3.41465
ANn_00040911	chr1	6603531	6604190	-	0	0
ANn_00040913	chr1	6620894	6621484	-	0	0
ANn_00040915	chr1	6625587	6627731	+	75.2601	106.834
ANn_00040916	chr1	6669467	6671435	-	9.78411	6.61365
ANn_00040918	chr1	6771123	6772751	-	0	0
ANn_00040919	chr1	6820060	6821462	+	0	0
ANn_00040920	chr1	6904385	6962715	+	15.6739	13.5843
ANn_00040921	chr1	6989752	6990553	-	0.100163	0.337155
ANn_00040923	chr1	7015968	7016493	-	39.1517	52.0767
ANn_00040924	chr1	7022208	7053160	-	1.67644	0.626693
ANn_00040926	chr1	7115594	7116866	-	0.033051	0.030243
ANn_00040927	chr1	7180372	7180803	-	0.756801	0.04176
ANn_00040928	chr1	7183423	7184852	+	16.3209	13.2597
ANn_00040929	chr1	7192983	7193665	+	165.069	56.8204
ANn_00040930	chr1	7209830	7211314	-	4.2675	6.20292
ANn_00040931	chr1	7287925	7314308	-	12.7994	23.2041
ANn_00040932	chr1	7350628	7351194	+	42.1568	39.7118
ANn_00040933	chr1	7352816	7353199	-	101.321	138.341
ANn_00040936	chr1	7362446	7383451	-	0.731234	12.2273
ANn_00040937	chr1	7414576	7415442	+	12.7721	8.51029
ANn_00040938	chr1	7478105	7489691	+	13.9709	24.0446
ANn_00040939	chr1	7522709	7556283	+	27.2274	30.8258
ANn_00040940	chr1	7577848	7582688	-	0	0
ANn_00040941	chr1	7616079	7617051	+	1.02849	0.563605
ANn_00040942	chr1	7617482	7619761	+	10.6342	7.77765
ANn_00040944	chr1	7632029	7632646	+	0	0
ANn_00040947	chr1	7640022	7640887	+	84.1294	98.8508
ANn_00040948	chr1	7641983	7643225	-	24.6522	21.3948
ANn_00040949	chr1	7663674	7664303	+	4.21758	0.609983
ANn_00040950	chr1	7670853	7690505	-	112.287	118.614
ANn_00040951	chr1	7691556	7693859	+	0.181019	0.100325
ANn_00040952	chr1	7703143	7704406	-	196.625	63.1174
ANn_00040953	chr1	7753810	7754949	-	19.7887	8.41618
ANn_00040954	chr1	7755862	7756303	-	0.769909	0
ANn_00040955	chr1	7772795	7773160	+	14.2159	11.9446
ANn_00040957	chr1	7801376	7882771	-	43.9839	58.8508
ANn_00040958	chr1	7883479	7883769	+	6.55482	5.67071
ANn_00040959	chr1	7898763	7899714	-	91.7847	135.126
ANn_00040960	chr1	7901029	7958625	-	1.84662	0.406482
ANn_00040962	chr1	7967322	8067830	+	0	0
ANn_00040963	chr1	8025506	8026583	+	1.30723	1.07311
ANn_00040964	chr1	8085795	8086220	-	0.127368	0
ANn_00040965	chr1	8108657	8109420	-	18.616	14.9387
ANn_00040967	chr1	8154226	8195173	+	0.120858	0.300886
ANn_00040969	chr1	8167792	8189608	+	7.70503	5.84452
ANn_00040968	chr1	8186994	8189135	+	23.0429	28.0109
ANn_00040970	chr1	8243168	8245288	+	48.5118	27.4103
ANn_00040971	chr1	8336834	8337350	-	5.54278	6.6424
ANn_00040972	chr1	8510155	8510364	+	18.2425	11.2627
ANn_00040973	chr1	8588742	8590610	-	10.6111	7.72866
ANn_00040975	chr1	8740500	8741825	+	0.39874	0.140746
ANn_00040976	chr1	8763676	8764516	+	10.0139	1.31395
ANn_00040977	chr1	8778792	8780955	-	6.88439	33.2263
ANn_00040978	chr1	8793287	8793742	+	2.47972	1.10817
ANn_00040979	chr1	8864933	8866160	+	0	0
ANn_00040980	chr1	8883046	8884753	-	0.853895	0.143161
ANn_00040982	chr1	8928601	8929596	-	45.2319	66.3057
ANn_00040983	chr1	8936027	8959322	+	31.6232	56.8421
ANn_00040984	chr1	8976691	8978450	+	0	0
ANn_00040985	chr1	9017473	9019349	-	7.83322	6.5485
ANn_00040987	chr1	9034928	9035278	-	0.451072	0.10102
ANn_00040988	chr1	9050155	9052214	+	149.889	186.174
ANn_00040989	chr1	9095172	9097722	-	2.44741	7.27422
ANn_00040990	chr1	9121012	9123273	-	4.99951	4.66394
ANn_00040992	chr1	9191961	9192420	-	0	0
ANn_00040993	chr1	9256999	9257323	-	0.024024	0.110274
ANn_00040995	chr1	9262173	9262497	-	3.87511	23.0032
ANn_00040997	chr1	9267347	9267671	-	10.5214	5.79592
ANn_00040998	chr1	9272524	9272848	-	37.7267	41.7354
ANn_00040999	chr1	9303054	9307371	+	34.4061	47.8634
ANn_00041000	chr1	9320271	9321158	+	4.67365	7.92863
ANn_00041001	chr1	9326893	9333248	-	239.342	369.641
ANn_00041002	chr1	9352208	9355978	-	7.99907	13.3647
ANn_00041003	chr1	9395596	9458736	+	58.2587	70.37
ANn_00041004	chr1	9496286	9499462	+	1.06318	1.51831
ANn_00041005	chr1	9572804	9573913	-	0.434056	1.06717
ANn_00041006	chr1	9579642	9579842	-	16.8623	27.3436
ANn_00041007	chr1	9580461	9581066	+	0.438634	3.54231
ANn_00041008	chr1	9590087	9590428	+	0	0
ANn_00041009	chr1	9613642	9615048	+	29.1084	56.8223
ANn_00041010	chr1	9615483	9619738	+	5.84323	4.30355
ANn_00041011	chr1	9630914	9632174	+	19.1718	11.0273
ANn_00041012	chr1	9689674	9689989	-	1.68904	2.11068
ANn_00041014	chr1	9714199	9715299	+	0.845306	0.351254
ANn_00041015	chr1	9880460	9881098	+	4.29715	1.7616
ANn_00041016	chr1	9914922	9915287	-	420.489	524.5
ANn_00041017	chr1	9931853	9941742	+	7.9007	9.28314
ANn_00041018	chr1	9964900	9965274	+	19.318	24.1986
ANn_00041019	chr1	9968546	9994908	-	0.377384	0.773602
ANn_00041020	chr1	9981483	9993126	-	22.2101	37.2073
ANn_00041021	chr1	10037169	10038369	-	82.4991	137.461
ANn_00041022	chr1	10083383	10084605	+	17.3426	14.0448
ANn_00041023	chr1	10101807	10102020	+	301.633	290.099
ANn_00041024	chr1	10108932	10117968	+	12.6261	21.7933
ANn_00041026	chr1	10138061	10232589	+	0	0
ANn_00041027	chr1	10232695	10232936	-	0.217823	0.123964
ANn_00041028	chr1	10288858	10293341	+	574.619	731.757
ANn_00041029	chr1	10295295	10302450	-	17.7637	9.27926
ANn_00041030	chr1	10359427	10361328	+	76.2728	154.566
ANn_00041031	chr1	10396111	10399053	+	50.1986	41.9233
ANn_00041032	chr1	10405614	10405967	+	0	0
ANn_00041033	chr1	10410148	10411416	-	34.089	23.0729
ANn_00041034	chr1	10420064	10421706	-	1.04774	0.411212
ANn_00041035	chr1	10441865	10445262	+	0	0
ANn_00041036	chr1	10460009	10462216	+	9.0818	14.2576
ANn_00041037	chr1	10463864	10465243	-	5.86209	3.39311
ANn_00041038	chr1	10474690	10475680	+	4.99224	3.92473
ANn_00041039	chr1	10479724	10512980	-	6.91259	2.72051
ANn_00041040	chr1	10526365	10527012	-	0.734079	0.39258
ANn_00041042	chr1	10548502	10549198	+	0	0
ANn_00041043	chr1	10565761	10567955	-	4.74557	7.01675
ANn_00041044	chr1	10599321	10600372	-	0	0
ANn_00041045	chr1	10615723	10618490	-	0	0
ANn_00041047	chr1	10644834	10722754	+	0	0
ANn_00041048	chr1	10781567	10781902	-	0	0
ANn_00041049	chr1	10840077	10864664	-	2.47502	3.0124
ANn_00041050	chr1	10861613	10862384	-	0	0
ANn_00041052	chr1	10912861	10913232	-	0	0
ANn_00041053	chr1	10939198	10946364	+	21.7204	17.3482
ANn_00041055	chr1	10953907	10978200	-	16.3398	7.2501
ANn_00041059	chr1	11039133	11048441	-	0	0
ANn_00041060	chr1	11052663	11053342	+	0	0.192076
ANn_00041063	chr1	11054079	11054826	+	78.3527	64.5588
ANn_00041065	chr1	11065069	11070037	+	1.76789	0.811423
ANn_00041066	chr1	11070893	11071309	-	18.9504	9.06985
ANn_00041067	chr1	11088143	11093627	-	5.97218	5.97082
ANn_00041068	chr1	11109367	11110005	+	12.8485	5.64769
ANn_00041069	chr1	11122786	11122947	-	22.6791	15.3092
ANn_00041070	chr1	11124980	11125726	+	1.7466	2.94784
ANn_00041071	chr1	11134583	11135986	+	27.3569	41.6426
ANn_00041072	chr1	11147602	11147850	+	7.13717	6.95494
ANn_00041073	chr1	11172020	11172742	-	0	0
ANn_00041074	chr1	11240106	11241269	+	0	0
ANn_00041075	chr1	11268704	11269084	-	0	0
ANn_00041076	chr1	11289515	11289705	+	46.6072	15.0672
ANn_00041077	chr1	11294052	11294369	+	12.3987	10.018
ANn_00041078	chr1	11296505	11297101	+	54.8466	44.1244
ANn_00041079	chr1	11322340	11372677	+	0	0
ANn_00041080	chr1	11374893	11391922	+	0.119226	0.119563
ANn_00041081	chr1	11391873	11392120	-	28.4965	27.586
ANn_00041082	chr1	11392922	11444984	-	0.750537	0.898879
ANn_00041083	chr1	11468448	11468827	-	0	0
ANn_00041084	chr1	11499086	11499488	-	2.70459	4.73981
ANn_00041085	chr1	11505301	11505676	-	2.4434	3.10996
ANn_00041086	chr1	11515883	11516354	-	0.114253	0.163894
ANn_00041087	chr1	11536407	11538544	-	0	0
ANn_00041088	chr1	11556114	11556547	+	0.278059	0.500696
ANn_00041089	chr1	11556687	11563810	+	0	0.076565
ANn_00041090	chr1	11568186	11568404	+	1.14205	0.473173
ANn_00041092	chr1	11586423	11612274	+	1.94271	8.49285
ANn_00041093	chr1	11633201	11635987	-	0.474373	0.089543
ANn_00041094	chr1	11651272	11652866	+	1.33244	0.112946
ANn_00041095	chr1	11651396	11653632	-	0.018009	0.021364
ANn_00041096	chr1	11656155	11658644	-	39.0305	21.0778
ANn_00041097	chr1	11659480	11659793	-	2.58766	13.4199
ANn_00041099	chr1	11660085	11660390	-	17.9941	9.41404
ANn_00041100	chr1	11660632	11661161	-	0.362214	0
ANn_00041101	chr1	11661513	11662051	-	0.560499	2.01786
ANn_00041102	chr1	11663488	11663769	+	0.377083	0
ANn_00041103	chr1	11665482	11666140	-	0.122053	0.839701
ANn_00041104	chr1	11682110	11682381	-	0.105983	0
ANn_00041105	chr1	11682813	11683047	+	3.60666	1.88818
ANn_00041106	chr1	11700775	11703663	-	0	0
ANn_00041108	chr1	11717375	11718325	+	2.43208	1.56785
ANn_00041109	chr1	11753661	11754434	-	4.32511	0.848676
ANn_00041111	chr1	11783842	11787520	-	8.91823	6.52408
ANn_00041112	chr1	11791945	11792325	+	21.2326	12.7455
ANn_00041113	chr1	11795726	11796011	+	0.428325	5.34084
ANn_00041115	chr1	11796736	11799604	+	4.99322	5.53582
ANn_00041116	chr1	11820867	11823310	+	3.04334	1.47695
ANn_00041117	chr1	11822306	11823230	-	20.6856	22.8043
ANn_00041118	chr1	11832738	11833180	+	4.38849	12.9837
ANn_00041119	chr1	11841430	11843722	-	0	0
ANn_00041120	chr1	11852129	11853029	-	3.19549	2.53792
ANn_00041121	chr1	11853115	11853474	-	0	0.03266
ANn_00041122	chr1	11876361	11876987	+	23.939	38.9963
ANn_00041124	chr1	11881855	11882729	-	2.56517	6.39102
ANn_00041125	chr1	11905970	11908093	+	0	0
ANn_00041126	chr1	11929334	11933543	-	29.8303	44.7173
ANn_00041127	chr1	11991537	11993276	+	4.27723	5.53487
ANn_00041128	chr1	12027040	12028772	+	0	0.040798
ANn_00041129	chr1	12056044	12056298	-	2.17406	2.59433
ANn_00041131	chr1	12068985	12077771	-	0	0
ANn_00041132	chr1	12077799	12078455	-	6.27199	7.89635
ANn_00041133	chr1	12114965	12120056	+	0	0
ANn_00041134	chr1	12120669	12139842	-	5.11183	4.96469
ANn_00041135	chr1	12147948	12148756	-	0.084973	0.021863
ANn_00041136	chr1	12203664	12204634	+	0.126393	0.108389
ANn_00041137	chr1	12223255	12229047	+	0	0
ANn_00041138	chr1	12236330	12237235	-	0.186634	0.468876
ANn_00041139	chr1	12248547	12255858	+	0	0
ANn_00041140	chr1	12270875	12275337	+	0	0
ANn_00041141	chr1	12285113	12292050	-	10.4605	18.1382
ANn_00041142	chr1	12312658	12320596	-	1.21549	1.79675
ANn_00041143	chr1	12334315	12346053	-	1.33965	0.500711
ANn_00041144	chr1	12343587	12345140	+	1.66256	3.29381
ANn_00041145	chr1	12364265	12372962	-	2.87531	6.59782
ANn_00041146	chr1	12378494	12378931	-	3.39889	0.746927
ANn_00041147	chr1	12378834	12379219	+	0.164046	0.762275
ANn_00041148	chr1	12383764	12384804	-	74.9468	139.158
ANn_00041149	chr1	12395546	12406239	-	174.192	89.6166
ANn_00041150	chr1	12434814	12435841	+	12.8455	0.764924
ANn_00041151	chr1	12441630	12473133	-	0.250649	0.019341
ANn_00041152	chr1	12513597	12522023	+	3.68707	0.681878
ANn_00041153	chr1	12529491	12533489	+	0	0
ANn_00041154	chr1	12539346	12540789	-	1.51934	0.466941
ANn_00041155	chr1	12541302	12563189	+	0.107719	0.041008
ANn_00041157	chr1	12637542	12640145	-	1.07352	0.94739
ANn_00041158	chr1	12641786	12642999	+	19.5831	13.5778
ANn_00041159	chr1	12643133	12644791	+	0	0
ANn_00041160	chr1	12653386	12655175	+	0	0
ANn_00041161	chr1	12661143	12661449	-	24.2654	16.657
ANn_00041164	chr1	12662899	12665174	+	5.785	10.771
ANn_00041165	chr1	12690999	12691955	-	28.4323	42.49
ANn_00041167	chr1	12722014	12729262	-	0	0.161596
ANn_00041168	chr1	12751780	12764920	+	0.455633	0.876207
ANn_00041169	chr1	12783916	12912526	+	73.9774	176.599
ANn_00041170	chr1	12913532	12917186	-	0.688765	0.20205
ANn_00041171	chr1	12946813	12947282	+	10.4051	22.2429
ANn_00041172	chr1	12967534	12974989	+	13.1024	9.97442
ANn_00041173	chr1	13005169	13016049	-	0.421952	0
ANn_00041174	chr1	13055507	13057107	+	4.11865	0.650392
ANn_00041175	chr1	13080659	13096283	+	3.57063	5.73767
ANn_00041176	chr1	13102395	13104668	-	0	0
ANn_00041177	chr1	13107074	13110934	+	17.6048	13.0813
ANn_00041178	chr1	13114384	13115511	-	0	0
ANn_00041179	chr1	13126419	13129618	-	0	0
ANn_00041180	chr1	13134806	13140153	-	8.74097	14.1017
ANn_00041181	chr1	13150665	13150940	+	0	0
ANn_00041182	chr1	13151392	13154154	+	17.9585	26.2673
ANn_00041183	chr1	13155002	13157633	-	28.6246	57.6197
ANn_00041184	chr1	13175815	13176249	+	0	0
ANn_00041185	chr1	13183241	13184574	-	2.2024	1.42492
ANn_00041186	chr1	13191412	13191840	+	0.354405	0.365306
ANn_00041187	chr1	13205411	13207723	-	1.40781	2.95513
ANn_00041188	chr1	13211258	13269479	-	20.4111	23.892
ANn_00041189	chr1	13294232	13299616	+	4.12939	8.51568
ANn_00041190	chr1	13306958	13307560	-	4.80236	5.66632
ANn_00041191	chr1	13328760	13329139	+	7.56083	5.8305
ANn_00041192	chr1	13335569	13336362	-	0	0
ANn_00041194	chr1	13355063	13355902	-	0.019079	0.087456
ANn_00041195	chr1	13418866	13419280	+	0	0
ANn_00041196	chr1	13440775	13441623	-	44.7398	41.5201
ANn_00041197	chr1	13448106	13448900	-	29.9534	20.2421
ANn_00041198	chr1	13524780	13525055	-	0.317282	0.237449
ANn_00041199	chr1	13558828	13559376	-	253.14	101.02
ANn_00041200	chr1	13570351	13570890	-	11.0706	6.98512
ANn_00041201	chr1	13585111	13593443	+	0	0
ANn_00041202	chr1	13595878	13596679	+	0	0
ANn_00041203	chr1	13597225	13599057	-	0.544961	0
ANn_00041204	chr1	13610751	13657251	+	0	0
ANn_00041206	chr1	13660012	13660335	+	0	0
ANn_00041209	chr1	13666176	13690997	-	29.6734	45.5479
ANn_00041210	chr1	13711113	13715734	+	1.16711	1.81876
ANn_00041211	chr1	13717988	13720072	-	5.70649	3.9594
ANn_00041212	chr1	13723675	13725616	-	7.3445	5.27601
ANn_00041213	chr1	13729174	13731744	-	10.7905	6.97452
ANn_00041214	chr1	13733072	13735744	-	0.156163	0.011336
ANn_00041215	chr1	13761249	13761554	+	0.309907	0.348335
ANn_00041216	chr1	13787047	13919628	+	3.55533	2.7883
ANn_00041218	chr1	13835742	13836438	+	0	0
ANn_00041220	chr1	13922912	13924096	-	3.12771	2.18642
ANn_00041221	chr1	13948533	13971676	-	36.781	51.9238
ANn_00041222	chr1	13999989	14000324	-	0.076651	2.96775
ANn_00041223	chr1	14004819	14010573	+	1.04605	2.54881
ANn_00041224	chr1	14016449	14043411	-	108.834	55.2817
ANn_00041225	chr1	14065924	14072810	+	0	0.003566
ANn_00041227	chr1	14093099	14094701	+	35.6944	27.121
ANn_00041228	chr1	14102846	14104169	+	11.8742	6.12742
ANn_00041229	chr1	14106743	14106901	+	0	0
ANn_00041230	chr1	14127672	14128296	-	0.023006	0.02112
ANn_00041231	chr1	14139407	14139868	+	70.9354	37.0887
ANn_00041233	chr1	14155623	14158130	-	0	0
ANn_00041234	chr1	14172270	14172836	+	10.2267	15.6116
ANn_00041235	chr1	14172876	14174685	-	1.9319	0.151257
ANn_00041236	chr1	14186808	14189165	-	4.48382	5.34974
ANn_00041238	chr1	14200458	14200701	-	50.7906	36.0598
ANn_00041240	chr1	14213205	14358257	+	11.8084	19.5922
ANn_00041241	chr1	14268502	14268839	-	2.46197	2.21155
ANn_00041242	chr1	14360630	14362468	+	6.03965	6.04986
ANn_00041243	chr1	14392013	14400427	+	0	0
ANn_00041245	chr1	14413157	14413537	-	0	0
ANn_00041246	chr1	14413771	14413923	-	95.7146	37.5603
ANn_00041247	chr1	14413943	14420363	+	25.7034	26.1362
ANn_00041248	chr1	14413996	14415537	-	2.33716	0.869521
ANn_00041249	chr1	14424250	14424517	-	69.1954	54.6184
ANn_00041250	chr1	14427523	14428084	-	1.96132	0.947167
ANn_00041251	chr1	14442572	14445256	+	0.591105	0.724456
ANn_00041252	chr1	14451222	14451682	-	5.51551	7.41377
ANn_00041253	chr1	14452424	14456895	-	8.89938	9.04814
ANn_00041254	chr1	14481714	14482051	+	1.42786	0.542198
ANn_00041255	chr1	14496557	14506484	-	26.4649	27.3162
ANn_00041257	chr1	14539500	14540926	+	1.59809	0.360165
ANn_00041258	chr1	14540955	14545973	+	10.5858	20.6278
ANn_00041259	chr1	14553982	14558507	+	26.9654	29.4887
ANn_00041260	chr1	14554915	14555620	+	1.92042	0.693572
ANn_00041261	chr1	14565678	14578021	+	2.98705	2.06681
ANn_00041262	chr1	14581892	14586173	-	0	0
ANn_00041263	chr1	14591384	14593148	-	0	0
ANn_00041264	chr1	14625921	14626811	+	0	0
ANn_00041265	chr1	14632248	14639353	-	0	0
ANn_00041266	chr1	14638385	14639432	+	0	0
ANn_00041267	chr1	14662088	14681277	-	0	0
ANn_00041268	chr1	14726453	14726979	+	615.745	592.575
ANn_00041269	chr1	14727157	14727557	+	3.02269	3.65866
ANn_00041270	chr1	14734871	14740797	-	0.100706	0.289156
ANn_00041271	chr1	14751326	14752252	-	0	0
ANn_00041272	chr1	14754343	14755225	-	0	0
ANn_00041273	chr1	14761987	14762319	+	0	0
ANn_00041274	chr1	14782433	14788125	+	15.6418	26.7097
ANn_00041275	chr1	14794513	14794793	-	17.9561	34.5207
ANn_00041276	chr1	14835952	14840641	+	26.666	33.4962
ANn_00041277	chr1	14840863	14843390	-	7.21518	11.8606
ANn_00041278	chr1	14859428	14859939	-	2.46317	1.25296
ANn_00041279	chr1	14862327	14867413	+	0	0
ANn_00041280	chr1	14862466	14862631	-	0	0
ANn_00041281	chr1	14896625	14901499	+	2.29311	1.76897
ANn_00041282	chr1	14915879	14917669	-	0.569789	1.72563
ANn_00041283	chr1	14949593	14953931	+	5.46144	1.65529
ANn_00041285	chr1	14986324	14997179	+	23.099	29.8801
ANn_00041286	chr1	15015115	15023305	+	4.77564	2.96469
ANn_00041287	chr1	15023649	15024279	+	0.134033	0.287464
ANn_00041288	chr1	15026082	15027173	-	0.154325	0
ANn_00041289	chr1	15039451	15040894	+	0.96091	0.05737
ANn_00041290	chr1	15050946	15058005	+	0.67206	0.154241
ANn_00041291	chr1	15064843	15066405	+	0.769228	0
ANn_00041292	chr1	15075272	15078011	-	0.385491	0.044273
ANn_00041293	chr1	15099066	15099572	+	0	0
ANn_00041295	chr1	15109236	15109622	+	30.5261	50.3322
ANn_00041296	chr1	15187413	15188666	-	12.3973	16.6483
ANn_00041297	chr1	15280567	15286216	+	14.3901	15.0095
ANn_00041298	chr1	15303198	15306159	+	16.9481	3.55242
ANn_00041299	chr1	15316700	15322287	-	7.90236	8.73495
ANn_00041300	chr1	15328588	15337555	+	0	0
ANn_00041301	chr1	15358616	15361131	+	4.56072	3.6223
ANn_00041302	chr1	15365931	15369140	+	4.54719	6.58981
ANn_00041303	chr1	15376340	15378851	+	35.4	8.81128
ANn_00041304	chr1	15381261	15384470	+	23.0047	15.212
ANn_00041305	chr1	15408519	15409032	+	100.881	129.074
ANn_00041306	chr1	15409498	15454181	+	0.351089	0.012649
ANn_00041307	chr1	15457658	15461540	+	17.6791	10.5979
ANn_00041308	chr1	15465444	15466295	-	0	0
ANn_00041309	chr1	15467022	15482423	+	66.8991	192.299
ANn_00041310	chr1	15484869	15486850	+	9.20535	8.12565
ANn_00041312	chr1	15500513	15508434	-	0.388149	0.066537
ANn_00041313	chr1	15541126	15544583	+	18.4069	4.18706
ANn_00041314	chr1	15551374	15551929	+	3.63254	1.34788
ANn_00041315	chr1	15564764	15565297	+	9.47825	11.6445
ANn_00041316	chr1	15583386	15586742	-	0.057522	0.173314
ANn_00041317	chr1	15591610	15592112	+	15.6767	14.4245
ANn_00041318	chr1	15608367	15609025	+	3.13097	4.07826
ANn_00041319	chr1	15621036	15622556	-	1.75308	0.549811
ANn_00041320	chr1	15661156	15661716	-	4.55983	7.73133
ANn_00041321	chr1	15668714	15669250	-	4.11134	7.00356
ANn_00041322	chr1	15675290	15675877	-	21.6865	25.034
ANn_00041323	chr1	15677506	15677982	-	0.371108	7.18388
ANn_00041324	chr1	15692168	15692590	-	42.9686	21.8734
ANn_00041325	chr1	15702164	15702598	-	24.2398	13.6486
ANn_00041326	chr1	15714107	15720482	-	25.1757	21.3122
ANn_00041327	chr1	15735269	15736718	+	0	0.141551
ANn_00041329	chr1	15736909	15738063	+	0	0
ANn_00041330	chr1	15768838	15771576	-	8.46929	4.99939
ANn_00041331	chr1	15777072	15778264	-	3.15321	0.481703
ANn_00041332	chr1	15792308	15973346	-	0.064687	0.089373
ANn_00041333	chr1	15806557	15806769	-	3.46515	5.43416
ANn_00041334	chr1	16048313	16050795	-	11.1981	5.72314
ANn_00041335	chr1	16112444	16152573	+	2.12463	1.11218
ANn_00041336	chr1	16153510	16176987	-	14.4452	22.7996
ANn_00041337	chr1	16173712	16174204	+	70.6967	77.6167
ANn_00041338	chr1	16183537	16185404	+	57.2321	40.7843
ANn_00041340	chr1	16217460	16218920	-	0.220395	0.087285
ANn_00041342	chr1	16220314	16221442	-	0	0
ANn_00041343	chr1	16228250	16228987	+	1.74699	2.57847
ANn_00041344	chr1	16239738	16241282	-	0.197689	0.052001
ANn_00041346	chr1	16262198	16263880	-	0.567058	0.048639
ANn_00041347	chr1	16271620	16271904	+	0	0.036724
ANn_00041348	chr1	16275187	16275973	+	18.0989	11.646
ANn_00041349	chr1	16280682	16281432	+	10.9547	4.87022
ANn_00041350	chr1	16313865	16351607	+	0.624484	0.529357
ANn_00041351	chr1	16352188	16353993	+	940.349	1486.2
ANn_00041352	chr1	16363707	16381578	+	84.377	39.5474
ANn_00041353	chr1	16402612	16402941	+	4.20232	11.8864
ANn_00041354	chr1	16407959	16417978	+	105.03	108.916
ANn_00041355	chr1	16429875	16433044	+	2.98608	0.325468
ANn_00041356	chr1	16436430	16444435	-	0.931519	0.92641
ANn_00041357	chr1	16503949	16507708	+	1.39739	0.173254
ANn_00041359	chr1	16507706	16509736	-	0	0
ANn_00041360	chr1	16542600	16544836	+	4.53177	3.8119
ANn_00041361	chr1	16553336	16560173	+	5.02976	15.4694
ANn_00041363	chr1	16576778	16582073	+	5.99086	1.33347
ANn_00041364	chr1	16588014	16588926	+	39.8747	26.9823
ANn_00041365	chr1	16590333	16592363	-	3.46735	14.1918
ANn_00041366	chr1	16603844	16604693	-	4.46927	1.51159
ANn_00041368	chr1	16607559	16609248	-	0.645797	1.64122
ANn_00041369	chr1	16621859	16622525	-	0.609975	0.283536
ANn_00041370	chr1	16625905	16626201	+	4.22264	2.32625
ANn_00041371	chr1	16643149	16671137	+	2.34712	1.47239
ANn_00041372	chr1	16651702	16652082	-	0.432965	0.396341
ANn_00041373	chr1	16712233	16712844	-	2.24454	0.551709
ANn_00041374	chr1	16742480	16744009	+	0.697806	0.452785
ANn_00041375	chr1	16745002	16799357	-	1.15068	0.704643
ANn_00041376	chr1	16815078	16815616	-	1.84569	1.89654
ANn_00041377	chr1	16822964	16825428	-	0	0
ANn_00041378	chr1	16841858	16940809	-	1.24812	1.13031
ANn_00041379	chr1	16906313	16907435	+	10.4587	16.763
ANn_00041380	chr1	17025170	17025571	+	0	0
ANn_00041381	chr1	17040595	17045504	+	0	0
ANn_00041382	chr1	17055878	17056689	-	2.48566	2.45066
ANn_00041383	chr1	17086484	17095388	+	1.43731	0.976039
ANn_00041384	chr1	17166111	17170159	+	0	0
ANn_00041386	chr1	17194889	17206473	+	2.78793	4.61702
ANn_00041387	chr1	17209447	17210245	+	0.104278	0.140671
ANn_00041388	chr1	17217544	17217978	-	3.29061	2.60859
ANn_00041390	chr1	17220829	17221284	-	52.1369	74.4066
ANn_00041391	chr1	17224539	17233614	-	3.81286	7.50584
ANn_00041392	chr1	17231952	17233332	+	0	0
ANn_00041393	chr1	17240322	17241479	+	0.835634	12.2338
ANn_00041394	chr1	17241503	17242513	+	10.3527	11.5179
ANn_00041395	chr1	17247421	17250960	-	19.8832	28.6717
ANn_00041396	chr1	17258985	17264965	+	11.1879	37.0137
ANn_00041397	chr1	17268813	17334072	-	0	0
ANn_00041398	chr1	17336546	17338224	+	0	0
ANn_00041399	chr1	17337876	17338313	-	4.04405	1.58472
ANn_00041402	chr1	17377541	17377923	+	0.730158	20.5946
ANn_00041403	chr1	17389401	17390267	-	13.2693	3.71755
ANn_00041407	chr1	17391754	17394535	+	40.8831	38.6452
ANn_00041408	chr1	17402192	17404974	-	3.20793	1.88171
ANn_00041409	chr1	17409158	17409712	-	0.215592	0.351851
ANn_00041410	chr1	17451109	17458586	+	0.624747	1.38931
ANn_00041411	chr1	17458964	17461017	-	15.0499	5.75568
ANn_00041412	chr1	17462470	17495782	+	10.8805	8.08495
ANn_00041413	chr1	17497159	17497446	-	29.4718	7.08891
ANn_00041414	chr1	17499519	17501461	-	15.1663	2.05717
ANn_00041415	chr1	17526057	17527778	-	0	0
ANn_00041416	chr1	17542061	17549531	+	11.522	16.502
ANn_00041418	chr1	17549217	17551837	-	0.138081	0.140683
ANn_00041419	chr1	17597271	17600459	+	0	0
ANn_00041420	chr1	17648594	17742188	-	0.419501	0.243221
ANn_00041421	chr1	17858157	17859927	+	99.2566	65.0379
ANn_00041423	chr1	17865842	17874014	+	6.24899	1.44137
ANn_00041425	chr1	17925086	17925277	-	0	0
ANn_00041426	chr1	18010900	18011870	+	0	0
ANn_00041427	chr1	18023539	18031721	-	0	0
ANn_00041428	chr1	18093426	18108442	-	0	0.661838
ANn_00041429	chr1	18134794	18137386	-	0	0
ANn_00041430	chr1	18144848	18150080	-	0	0
ANn_00041431	chr1	18155994	18163155	-	9.47059	10.2684
ANn_00041432	chr1	18158942	18159227	-	0.044283	0
ANn_00041433	chr1	18175624	18287470	-	0	0
ANn_00041434	chr1	18299968	18301715	-	0	0
ANn_00041435	chr1	18331456	18332272	-	0.432228	0.438426
ANn_00041436	chr1	18340016	18341272	-	17.5017	15.0945
ANn_00041437	chr1	18389454	18391494	+	25.9217	16.5001
ANn_00041438	chr1	18412852	18414148	+	3.64638	1.42237
ANn_00041439	chr1	18425425	18426195	+	76.6974	126.663
ANn_00041442	chr1	18427120	18427959	-	39.7878	25.5768
ANn_00041443	chr1	18463115	18463432	+	10.1359	7.37141
ANn_00041444	chr1	18487966	18491820	-	12.106	7.43588
ANn_00041446	chr1	18544577	18578249	+	14.3667	7.44791
ANn_00041447	chr1	18574842	18576176	-	0.012182	0.045365
ANn_00041448	chr1	18693498	18694496	+	3.96969	4.5819
ANn_00041449	chr1	18711200	18712213	+	6.17601	6.34932
ANn_00041450	chr1	18717409	18722980	-	5.3385	8.50084
ANn_00041453	chr1	18731014	18731259	-	18.711	24.6465
ANn_00041455	chr1	18731771	18731948	+	2.07835	3.48101
ANn_00041456	chr1	18761134	18762051	+	3.72112	8.08167
ANn_00041457	chr1	18765521	18778016	-	0	0
ANn_00041458	chr1	18824164	18825546	-	2.31999	2.17104
ANn_00041459	chr1	18845732	18925498	-	1.34086	15.3786
ANn_00041460	chr1	18948914	18949661	-	0	0
ANn_00041461	chr1	18968520	18970014	-	50.2292	25.8645
ANn_00041462	chr1	19023766	19024178	+	0	0
ANn_00041463	chr1	19024589	19024840	+	6.11324	6.85311
ANn_00041464	chr1	19082949	19093699	-	5.88572	3.10751
ANn_00041465	chr1	19113392	19131230	+	19.4586	7.95627
ANn_00041466	chr1	19154897	19155704	-	12.294	6.9475
ANn_00041468	chr1	19157313	19158340	+	16.3419	10.2185
ANn_00041469	chr1	19199897	19202358	+	7.36168	3.07686
ANn_00041470	chr1	19252298	19252627	+	0	0.673858
ANn_00041471	chr1	19253591	19254112	+	8.67759	13.9993
ANn_00041472	chr1	19279677	19280010	-	0.059764	0.027432
ANn_00041473	chr1	19294842	19298060	+	0	0
ANn_00041475	chr1	19307610	19307885	-	0.163788	0
ANn_00041476	chr1	19310354	19310764	-	44.3223	18.1862
ANn_00041479	chr1	19332391	19338384	+	17.4886	13.0609
ANn_00041480	chr1	19342602	19346587	+	69.0509	199.957
ANn_00041481	chr1	19366338	19369008	-	13.9539	18.5718
ANn_00041482	chr1	19386042	19388475	-	37.672	64.4835
ANn_00041483	chr1	19431231	19432817	+	0	0
ANn_00041484	chr1	19485384	19491365	+	9.37593	5.3552
ANn_00041485	chr1	19504602	19505441	+	8.7739	12.714
ANn_00041487	chr1	19528931	19534482	-	0.926759	0.656072
ANn_00041488	chr1	19568697	19570855	+	12.6408	8.58273
ANn_00041489	chr1	19574152	19574758	-	7.8401	3.5068
ANn_00041490	chr1	19579997	19580902	-	4.75137	4.47256
ANn_00041491	chr1	19621332	19625935	+	2.97969	1.33925
ANn_00041492	chr1	19627405	19629395	-	1.77166	3.95499
ANn_00041493	chr1	19635241	19637529	+	59.0165	48.493
ANn_00041494	chr1	19642447	19642903	-	0.091255	0.337913
ANn_00041495	chr1	19653142	19676774	+	0	0.094776
ANn_00041496	chr1	19678210	19679486	+	14.4039	6.29889
ANn_00041497	chr1	19687215	19689762	+	0	0.143732
ANn_00041498	chr1	19699372	19700185	-	0.322744	0.316748
ANn_00041499	chr1	19701007	19701225	-	7.42423	7.75141
ANn_00041500	chr1	19705200	19707943	-	0	0
ANn_00041501	chr1	19754747	19757240	-	0.597336	0.051932
ANn_00041502	chr1	19789253	19793103	-	0	0
ANn_00041503	chr1	19804366	19804869	+	0	0
ANn_00041504	chr1	19829186	19829802	-	30.1902	21.9347
ANn_00041505	chr1	19851069	19851741	-	0	0
ANn_00041506	chr1	19851979	19852318	-	0	0.053424
ANn_00041507	chr1	19862856	19869923	-	22.5421	18.5787
ANn_00041508	chr1	19864551	19865521	-	12.9821	16.8158
ANn_00041509	chr1	19912385	19914824	+	67.4162	75.354
ANn_00041510	chr1	19942329	19950497	-	5.29804	3.81916
ANn_00041511	chr1	20003450	20005623	-	1.626	0.131467
ANn_00041512	chr1	20022049	20022401	-	0.656752	0.946012
ANn_00041513	chr1	20043134	20125768	-	0	0
ANn_00041515	chr1	20152660	20153033	+	2.62827	4.53445
ANn_00041516	chr1	20155267	20164563	+	16.4743	21.7214
ANn_00041517	chr1	20204239	20204580	-	3.31461	2.09424
ANn_00041518	chr1	20222539	20223503	+	7.85812	27.9506
ANn_00041519	chr1	20251674	20255111	+	10.108	9.89086
ANn_00041520	chr1	20256641	20257495	+	0.363595	0.338313
ANn_00041521	chr1	20258143	20258508	-	0.425112	0.07993
ANn_00041522	chr1	20258643	20258858	-	0	0
ANn_00041523	chr1	20259811	20274636	-	6.16034	2.71715
ANn_00041524	chr1	20279302	20280505	+	6.98913	28.5025
ANn_00041525	chr1	20304909	20306374	+	4.87684	31.0342
ANn_00041526	chr1	20306994	20309974	-	24.1192	0.791439
ANn_00041528	chr1	20331306	20331844	-	3.61353	3.3395
ANn_00041529	chr1	20344780	20345079	+	30.3953	8.79918
ANn_00041530	chr1	20349252	20363323	+	86.745	138.673
ANn_00041531	chr1	20367134	20370144	-	8.04514	12.4671
ANn_00041532	chr1	20384866	20390599	-	82.5785	109.192
ANn_00041534	chr1	20415897	20416586	-	7.30769	3.4088
ANn_00041535	chr1	20456337	20456828	-	0	0
ANn_00041536	chr1	20474224	20474504	-	0.750252	5.00403
ANn_00041537	chr1	20547578	20548288	-	0	0.092727
ANn_00041538	chr1	20573476	20579056	+	0	0
ANn_00041540	chr1	20593032	20621024	+	29.9658	37.8578
ANn_00041541	chr1	20628907	20650970	-	79.2702	91.7208
ANn_00041542	chr1	20651284	20653487	+	59.5471	75.6759
ANn_00041543	chr1	20653877	20656726	-	7.66744	7.39133
ANn_00041545	chr1	20658318	20710629	-	0	0
ANn_00041546	chr1	20731754	20734479	-	0	0
ANn_00041547	chr1	20740078	20741277	-	0.063351	0
ANn_00041548	chr1	20770870	20772552	+	3.88652	3.06904
ANn_00041549	chr1	20787798	20788654	-	0	0
ANn_00041550	chr1	20789017	20789158	-	65.9489	100.043
ANn_00041551	chr1	20793061	20794319	+	0.34266	0.056753
ANn_00041552	chr1	20820744	20822547	+	0.928447	0
ANn_00041553	chr1	20841252	20842361	+	1.45414	2.27828
ANn_00041554	chr1	20842445	20843260	-	0.317739	0.317859
ANn_00041555	chr1	20863738	20864271	-	54.7289	49.9411
ANn_00041556	chr1	20864461	20864679	+	0.24	0.073664
ANn_00041558	chr1	20878222	20879865	+	0.289237	4.42061
ANn_00041559	chr1	20922733	20925068	+	0.120981	0.921871
ANn_00041561	chr1	20927268	20962273	-	18.3921	16.2381
ANn_00041562	chr1	20962659	20962930	+	0	0
ANn_00041563	chr1	20964107	20987099	-	50.8743	31.5163
ANn_00041564	chr1	21000958	21015258	+	0	0
ANn_00041565	chr1	21017128	21019389	-	90.9887	124.63
ANn_00041566	chr1	21081199	21081768	+	4.16703	3.21013
ANn_00041567	chr1	21091771	21092103	+	33.1083	21.9095
ANn_00041568	chr1	21118804	21121617	-	22.0482	8.51014
ANn_00041570	chr1	21157526	21161655	-	22.8134	41.53
ANn_00041571	chr1	21197781	21202804	+	0	0
ANn_00041572	chr1	21215302	21228943	-	3.63063	3.46034
ANn_00041574	chr1	21231959	21232758	+	1.02478	0.67605
ANn_00041575	chr1	21232289	21232751	-	0	0
ANn_00041576	chr1	21235099	21235767	+	0	0
ANn_00041578	chr1	21261056	21264746	-	0.598863	1.21806
ANn_00041580	chr1	21269990	21297548	-	4.35003	3.90619
ANn_00041581	chr1	21307607	21321741	+	13.8835	18.7412
ANn_00041582	chr1	21325152	21332977	+	3.70892	9.30029
ANn_00041583	chr1	21334694	21336431	+	81.0487	77.3079
ANn_00041584	chr1	21336820	21339609	+	0.158134	0
ANn_00041585	chr1	21429144	21429443	-	11.6003	20.5823
ANn_00041586	chr1	21475810	21488720	+	8.40527	7.4655
ANn_00041588	chr1	21492161	21494689	-	2.58646	1.13012
ANn_00041589	chr1	21505443	21511827	+	0.647436	0.717302
ANn_00041590	chr1	21519815	21520721	-	0.598146	0.067818
ANn_00041591	chr1	21536923	21538176	-	1.3995	0
ANn_00041592	chr1	21537884	21538103	+	0	0
ANn_00041594	chr1	21540526	21543907	-	17.7974	7.64508
ANn_00041595	chr1	21555731	21556054	+	0.015351	0.063415
ANn_00041596	chr1	21561566	21576690	+	0	0.177144
ANn_00041598	chr1	21586407	21586937	+	0	0
ANn_00041599	chr1	21616964	21618631	-	0.066553	0.294326
ANn_00041601	chr1	21663415	21663669	-	30.0859	21.3551
ANn_00041603	chr1	21768045	21768585	+	0	0
ANn_00041605	chr1	21771931	21775173	-	0.7625	0.484609
ANn_00041606	chr1	21787801	21789224	+	3.68046	5.97799
ANn_00041607	chr1	21789882	21792625	+	0	0
ANn_00041608	chr1	21793335	21795929	-	12.1042	20.5253
ANn_00041609	chr1	21804442	21804798	-	5.40991	1.11707
ANn_00041610	chr1	21819069	21821043	-	0.029033	0.18099
ANn_00041611	chr1	21844586	21850884	-	0	0
ANn_00041612	chr1	21874739	21875422	+	4.41418	4.48764
ANn_00041613	chr1	21882132	21885202	+	228.012	353.788
ANn_00041615	chr1	21886031	21886268	-	11.6379	19.2389
ANn_00041616	chr1	21886044	21887226	+	5.65081	6.88113
ANn_00041617	chr1	21888715	21892690	-	118.846	102.973
ANn_00041618	chr1	21916242	21916505	-	0	0
ANn_00041619	chr1	21957005	21960155	+	0	0
ANn_00041620	chr1	21974867	21987842	+	10.417	8.13939
ANn_00041621	chr1	22027908	22029154	-	0	0
ANn_00041623	chr1	22033112	22034855	-	3.63513	1.27805
ANn_00041624	chr1	22054536	22067956	-	34.3162	57.9913
ANn_00041626	chr1	22076809	22109950	-	0	0
ANn_00041627	chr1	22123974	22124377	+	0	0
ANn_00041628	chr1	22140258	22160963	+	1.5377	0.494816
ANn_00041629	chr1	22181736	22184143	+	24.5821	39.8366
ANn_00041630	chr1	22186834	22193792	-	4.80554	4.47442
ANn_00041631	chr1	22226351	22226803	-	73.5915	78.3799
ANn_00041632	chr1	22269814	22296494	-	2.18784	3.25255
ANn_00041634	chr1	22296505	22297565	-	51.9216	52.7348
ANn_00041635	chr1	22352326	22354228	+	11.597	13.8297
ANn_00041636	chr1	22363451	22363774	-	24.1275	17.5575
ANn_00041637	chr1	22390857	22393244	+	0	0
ANn_00041640	chr1	22416390	22419220	-	0	0
ANn_00041641	chr1	22443651	22443938	-	18.3496	6.47301
ANn_00041642	chr1	22446411	22459493	+	155.787	158.021
ANn_00041643	chr1	22465387	22466883	+	0.292084	0.071472
ANn_00041644	chr1	22469404	22471433	-	0	0
ANn_00041645	chr1	22486448	22487160	-	102.829	67.4498
ANn_00041646	chr1	22490938	22491650	-	42.2591	30.9189
ANn_00041647	chr1	22495428	22496140	-	27.4327	52.1642
ANn_00041648	chr1	22499918	22500628	-	0.159022	11.298
ANn_00041649	chr1	22501055	22501595	+	27.7866	29.3329
ANn_00041651	chr1	22568067	22569417	+	0	0
ANn_00041652	chr1	22595464	22600054	+	0	0
ANn_00041653	chr1	22645940	22659168	+	0.174904	0.211214
ANn_00041657	chr1	22687836	22688161	+	102.462	85.0926
ANn_00041659	chr1	22688517	22689176	+	0.040557	0.037546
ANn_00041660	chr1	22696141	22698828	+	11.1018	45.6631
ANn_00041661	chr1	22709090	22712827	-	21.902	33.4118
ANn_00041662	chr1	22723746	22725229	-	2.18647	9.96354
ANn_00041663	chr1	22741529	22742494	+	0	0
ANn_00041655	chr1	22742677	22747535	+	0.566083	0.167331
ANn_00041664	chr1	22742677	22743483	-	36.4191	30.5965
ANn_00041666	chr1	22744699	22746119	-	3.77045	6.61856
ANn_00041667	chr1	22768727	22773204	-	0.10706	0.049142
ANn_00041668	chr1	22799829	22804549	+	0	0
ANn_00041669	chr1	22824170	22824561	-	0.104824	1.21692
ANn_00041670	chr1	22831423	22832939	+	9.88616	14.194
ANn_00041672	chr1	22859602	22861496	-	14.5474	22.3365
ANn_00041673	chr1	22869502	22869789	+	22.1597	8.60375
ANn_00041674	chr1	22876025	22877724	-	0.071676	0
ANn_00041675	chr1	22919799	22923625	+	9.66573	8.8274
ANn_00041676	chr1	22926245	22926610	-	17.3372	5.97827
ANn_00041677	chr1	22958128	22960498	-	0.664632	0.374542
ANn_00041678	chr1	22997938	23002636	+	5.1711	6.62236
ANn_00041679	chr1	23024473	23027418	+	67.4517	99.6487
ANn_00041680	chr1	23041163	23053106	-	0.367332	1.43613
ANn_00041681	chr1	23082456	23083062	-	62.3394	29.5404
ANn_00041682	chr1	23087535	23090311	+	10.7492	15.0761
ANn_00041683	chr1	23090812	23106745	-	15.0315	1.81156
ANn_00041685	chr1	23091297	23091825	-	16.8951	59.8395
ANn_00041686	chr1	23125829	23126170	-	19.9803	17.0501
ANn_00041688	chr1	23132149	23132677	-	0	0
ANn_00041689	chr1	23136569	23137069	-	0.588216	1.45834
ANn_00041690	chr1	23141137	23142096	+	0.354368	3.3765
ANn_00041691	chr1	23156574	23159578	-	0.415348	0.679218
ANn_00041692	chr1	23180010	23186146	+	2.62635	0.817892
ANn_00041693	chr1	23180060	23180355	-	0	0
ANn_00041694	chr1	23192455	23204946	+	11.4792	6.09501
ANn_00041696	chr1	23217095	23217511	+	3.1784	1.92042
ANn_00041697	chr1	23227505	23230960	+	29.6121	14.4371
ANn_00041698	chr1	23232099	23236336	+	12.0339	5.05441
ANn_00041701	chr1	23246882	23264709	-	0.132719	0.467522
ANn_00041703	chr1	23289089	23290539	+	0.200342	2.40102
ANn_00041705	chr1	23307496	23310049	+	5.93685	14.4718
ANn_00041706	chr1	23323447	23327251	-	20.3814	30.7694
ANn_00041707	chr1	23340082	23462268	-	0.400026	0
ANn_00041708	chr1	23440736	23440888	+	0.800768	1.39693
ANn_00041710	chr1	23465107	23465259	+	11.4755	7.44121
ANn_00041711	chr1	23478765	23500588	+	22.7822	10.9924
ANn_00041712	chr1	23502828	23504908	-	7.94866	12.2412
ANn_00041713	chr1	23556871	23561598	-	1.46047	1.46109
ANn_00041714	chr1	23602634	23604471	-	5.98495	5.2868
ANn_00041715	chr1	23664775	23670829	+	10.2631	7.50095
ANn_00041716	chr1	23679164	23683705	+	0.071153	0
ANn_00041717	chr1	23689092	23690440	+	118.775	1.07505
ANn_00041718	chr1	23690611	23691771	-	0	0
ANn_00041719	chr1	23703366	23704317	-	51.9123	20.1787
ANn_00041720	chr1	23707556	23833470	-	5.89283	0.566495
ANn_00041721	chr1	23808877	23810994	+	21.3996	6.12653
ANn_00041722	chr1	23831252	23832082	+	2.0708	3.92373
ANn_00041723	chr1	23840457	23845838	-	36.7332	42.681
ANn_00041724	chr1	23845800	23846309	+	1.55008	0.938506
ANn_00041725	chr1	23847195	23848093	+	25.1543	30.3217
ANn_00041726	chr1	23861328	23870818	+	3.89137	5.95715
ANn_00041727	chr1	23882414	23885104	+	0	0
ANn_00041728	chr1	23902801	23904900	-	7.82972	8.01569
ANn_00041729	chr1	23906904	23907362	+	0	0
ANn_00041730	chr1	23907363	23908088	+	26.5895	36.1141
ANn_00041731	chr1	23911496	23913056	-	0	0
ANn_00041732	chr1	23937694	23947595	+	16.4146	17.8469
ANn_00041735	chr1	23981472	23982221	-	0	0
ANn_00041736	chr1	23998878	24002007	+	0	0.089222
ANn_00041737	chr1	24004718	24038042	+	1.89543	1.10593
ANn_00041738	chr1	24041773	24042701	-	6.5363	5.49225
ANn_00041740	chr1	24053054	24068190	+	0	0
ANn_00041741	chr1	24072609	24080010	-	197.619	156.661
ANn_00041742	chr1	24094125	24095995	-	0.262033	2.09133
ANn_00041745	chr1	24137502	24137903	-	235.665	109.782
ANn_00041746	chr1	24138084	24138598	-	117.967	24.225
ANn_00041747	chr1	24212866	24217893	+	21.6467	10.2356
ANn_00041748	chr1	24227014	24228063	-	2.51961	3.41511
ANn_00041749	chr1	24229986	24230357	-	3.36927	1.22432
ANn_00041750	chr1	24231003	24237286	-	0.598218	0.467753
ANn_00041752	chr1	24246819	24247219	+	6.86036	6.65868
ANn_00041753	chr1	24262307	24262720	-	12.3997	9.2421
ANn_00041754	chr1	24262609	24262998	+	0	0
ANn_00041755	chr1	24266849	24268899	+	0.852556	1.20388
ANn_00041756	chr1	24275179	24277221	+	14.0307	22.3429
ANn_00041757	chr1	24279364	24313574	-	3.0838	1.21626
ANn_00041758	chr1	24302696	24303284	-	8.66782	5.52073
ANn_00041759	chr1	24334228	24335340	-	0.300793	0
ANn_00041760	chr1	24353100	24353270	+	27.6301	17.4913
ANn_00041761	chr1	24362260	24373848	-	0.035093	0
ANn_00041762	chr1	24375202	24376197	+	2.86016	2.04825
ANn_00041763	chr1	24385093	24392439	-	0	0
ANn_00041764	chr1	24413092	24413300	+	18.721	7.3517
ANn_00041765	chr1	24481741	24492563	+	0.534846	0.448313
ANn_00041766	chr1	24508171	24508896	+	23.3009	21.4389
ANn_00041767	chr1	24535113	24536529	+	0	0
ANn_00041769	chr1	24577694	24580066	+	24.8788	13.432
ANn_00041770	chr1	24594464	24607616	-	0.953696	0
ANn_00041771	chr1	24652205	24654333	+	0.431683	0.29148
ANn_00041774	chr1	24657371	24658299	+	4.01208	3.69755
ANn_00041775	chr1	24659189	24659638	-	2.61	3.87833
ANn_00041776	chr1	24676504	24683156	+	28.8183	2.31147
ANn_00041777	chr1	24697689	24701084	+	0.249013	0
ANn_00041779	chr1	24717410	24728402	-	0.687018	0.665125
ANn_00041780	chr1	24742754	24743131	-	1.13595	3.2166
ANn_00041781	chr1	24764401	24781280	+	7.33899	4.79557
ANn_00041783	chr1	24801226	24804626	-	0.680133	0.13154
ANn_00041784	chr1	24817063	24819569	-	0	0
ANn_00041785	chr1	24827263	24832372	-	1.16462	1.47239
ANn_00041786	chr1	24864964	24870935	-	28.73	30.7066
ANn_00041787	chr1	24879281	24879709	-	0	0
ANn_00041788	chr1	24894812	24895437	-	0	0
ANn_00041789	chr1	24902161	24903599	-	0	0
ANn_00041790	chr1	24911508	24917784	+	0	0
ANn_00041791	chr1	24913980	24914954	+	0.051366	0
ANn_00041792	chr1	24932268	24967984	-	0.03622	0
ANn_00041793	chr1	24970861	24971366	-	0	0
ANn_00041794	chr1	25001713	25002105	-	1.20028	0.665749
ANn_00041796	chr1	25008440	25012399	+	0.646542	0.219278
ANn_00041797	chr1	25021361	25044417	+	0.851057	0.826012
ANn_00041798	chr1	25052403	25056155	+	30.8107	43.0876
ANn_00041799	chr1	25095941	25101636	-	10.3572	11.0297
ANn_00041800	chr1	25120483	25142259	-	0	0
ANn_00041802	chr1	25167518	25167796	+	169.727	168.061
ANn_00041804	chr1	25214366	25236909	-	11.6382	12.046
ANn_00041805	chr1	25233265	25234317	-	15.7904	8.75015
ANn_00041806	chr1	25237405	25238179	-	1.17205	0.35981
ANn_00041807	chr1	25275749	25277422	-	0	0
ANn_00041808	chr1	25279196	25279390	+	0	0
ANn_00041809	chr1	25283527	25283977	-	0	0
ANn_00041810	chr1	25347769	25353160	-	0	0
ANn_00041811	chr1	25356311	25356649	-	0	0
ANn_00041813	chr1	25356852	25359379	-	39.6208	37.8645
ANn_00041814	chr1	25387378	25389057	+	0.063056	0
ANn_00041816	chr1	25389065	25390973	-	0.279565	0.024193
ANn_00041817	chr1	25427464	25428465	-	3.7233	3.74574
ANn_00041818	chr1	25444421	25446286	+	4.91948	4.42126
ANn_00041819	chr1	25462397	25464437	-	2.47228	2.4348
ANn_00041820	chr1	25467924	25468824	-	8.53956	14.7866
ANn_00041821	chr1	25493481	25497064	-	0	0
ANn_00041822	chr1	25510164	25513220	-	0	0
ANn_00041823	chr1	25532202	25532947	-	0	0
ANn_00041824	chr1	25589232	25590207	+	0	0
ANn_00041825	chr1	25600462	25603742	+	0	0.196909
ANn_00041826	chr1	25620929	25621701	-	0	0
ANn_00041827	chr1	25652743	25653915	+	0	0
ANn_00041828	chr1	25654564	25660219	+	0	0
ANn_00041829	chr1	25715445	25716652	+	0	0
ANn_00041834	chr1	25728111	25729643	-	0	0
ANn_00041832	chr1	25728598	25730039	+	0	0
ANn_00041838	chr1	25750327	25750659	+	0.99041	1.26558
ANn_00041839	chr1	25794668	25795877	+	27.4502	24.3202
ANn_00041830	chr1	25796527	25802273	+	0	0
ANn_00041842	chr1	25807359	25808880	-	343.954	485.8
ANn_00041840	chr1	25807846	25809280	+	22.02	21.3209
ANn_00041844	chr1	25828963	25829295	+	0	0
ANn_00041845	chr1	25839893	25845147	-	13.5689	8.623
ANn_00041846	chr1	25857179	25860152	+	0	0
ANn_00041847	chr1	25859215	25860238	-	8.93971	11.5052
ANn_00041848	chr1	25868493	25868813	+	84.8061	32.57
ANn_00041849	chr1	25874199	25877848	+	3.194	1.55231
ANn_00041850	chr1	25890702	25892957	+	0	0
ANn_00041851	chr1	25893812	25893970	-	10.5995	6.55897
ANn_00041852	chr1	25896575	25897387	-	19.4139	21.6456
ANn_00041854	chr1	25902076	25902602	-	23.4831	34.0854
ANn_00041855	chr1	25904166	25904521	+	0	0
ANn_00041856	chr1	25912161	25918472	-	0	0
ANn_00041857	chr1	25938050	25941468	-	0.142211	0.603477
ANn_00041858	chr1	25996897	26003751	-	0	0
ANn_00041860	chr1	26005599	26044750	-	0	0
ANn_00041861	chr1	26031805	26032392	-	0	0
ANn_00041862	chr1	26078239	26088849	-	0	0
ANn_00041865	chr1	26152287	26153455	+	0.311442	0.018175
ANn_00041866	chr1	26152420	26152969	-	1.01527	0
ANn_00041868	chr1	26164034	26164868	-	0.734739	0.158862
ANn_00041869	chr1	26199979	26201139	-	1.54418	0.981645
ANn_00041870	chr1	26208233	26209799	+	0.336576	0.582917
ANn_00041871	chr1	26210660	26211664	+	31.4838	36.1043
ANn_00041874	chr1	26253384	26261881	-	4.07463	2.44573
ANn_00041875	chr1	26262762	26262988	+	12.3346	19.906
ANn_00041877	chr1	26270279	26270819	-	0.342885	0.293776
ANn_00041878	chr1	26271260	26273985	-	0.032594	0.149608
ANn_00041879	chr1	26315804	26316189	+	27.0434	38.5693
ANn_00041880	chr1	26419177	26428201	-	0.161367	0.231129
ANn_00041881	chr1	26436568	26437638	-	1.90872	10.2618
ANn_00041882	chr1	26448472	26451469	-	37.0704	48.6104
ANn_00041883	chr1	26457272	26475953	-	0	0
ANn_00041885	chr1	26461692	26462493	+	0	0
ANn_00041886	chr1	26484414	26503782	-	0	0
ANn_00041887	chr1	26504882	26506028	-	2.5608	0.138113
ANn_00041888	chr1	26535908	26538337	+	0	0
ANn_00041889	chr1	26553880	26556531	-	0	0
ANn_00041890	chr1	26603182	26619745	-	0	0
ANn_00041891	chr1	26628452	26657530	-	0	0
ANn_00041892	chr1	26673719	26681715	+	0	0
ANn_00041893	chr1	26683592	26685377	-	39.2874	31.7288
ANn_00041897	chr1	26695216	26695659	-	1.59838	27.191
ANn_00041898	chr1	26715890	26716240	-	0.138341	0.242391
ANn_00041899	chr1	26717902	26735009	+	16.5624	19.3168
ANn_00041900	chr1	26775866	26776181	+	69.0563	1.84539
ANn_00041901	chr1	26783486	26809783	-	0	0.052831
ANn_00041902	chr1	26830666	26833216	-	0	0
ANn_00041903	chr1	26839188	26850428	-	19.8362	17.936
ANn_00041904	chr1	26851289	26852165	-	0	0
ANn_00041905	chr1	26864180	26865551	-	5.47244	7.35801
ANn_00041906	chr1	26876051	26876610	+	0.08729	0
ANn_00041907	chr1	26889165	26889722	-	11.6477	13.8033
ANn_00041908	chr1	26902410	26905017	-	0.316933	0.207188
ANn_00041909	chr1	26928501	26930477	-	0	0
ANn_00041910	chr1	26934868	26935203	-	0.277997	0.158085
ANn_00041911	chr1	26939789	27013061	+	1.38471	0.358859
ANn_00041913	chr1	27016095	27020660	-	0.296557	0.052502
ANn_00041914	chr1	27022338	27022496	+	0	0
ANn_00041915	chr1	27029510	27058272	+	11.7849	5.64436
ANn_00041916	chr1	27037544	27037916	+	44.6575	61.7925
ANn_00041918	chr1	27074681	27077163	-	700.441	632.447
ANn_00041919	chr1	27089968	27092192	+	3.97355	4.26402
ANn_00041920	chr1	27132363	27148037	-	16.8205	35.7013
ANn_00041921	chr1	27155559	27156975	+	6.62995	7.19735
ANn_00041922	chr1	27187518	27266734	+	0	0
ANn_00041924	chr1	27278912	27304191	+	20.6568	35.8787
ANn_00041925	chr1	27309664	27310987	+	7.52902	7.99094
ANn_00041926	chr1	27341198	27343886	-	1.90937	0.689558
ANn_00041927	chr1	27347816	27370080	-	1.83378	0.189402
ANn_00041928	chr1	27354653	27366308	+	18.1079	1.37272
ANn_00041929	chr1	27384105	27395890	+	0.247813	0
ANn_00041930	chr1	27424111	27430434	+	0.13114	0.349264
ANn_00041931	chr1	27449108	27466137	+	5.08517	17.3477
ANn_00041932	chr1	27461500	27462770	-	8.93231	7.15132
ANn_00041934	chr1	27469670	27470213	+	5.23702	40.9816
ANn_00041935	chr1	27474664	27484125	+	0.052211	0.401921
ANn_00041936	chr1	27483171	27484144	-	38.0976	49.5265
ANn_00041937	chr1	27503204	27503629	-	0.412938	0.196233
ANn_00041939	chr1	27517444	27552989	+	0	0
ANn_00041940	chr1	27552991	27553742	-	8.38793	6.74763
ANn_00041941	chr1	27578633	27589589	+	0	0
ANn_00041942	chr1	27626340	27632221	-	5.47632	9.07993
ANn_00041943	chr1	27629387	27630045	+	37.3466	47.5336
ANn_00041944	chr1	27629657	27630045	-	1.09055	0.552473
ANn_00041947	chr1	27646196	27646636	+	0.335981	0.158637
ANn_00041948	chr1	27648623	27649116	-	0	0
ANn_00041949	chr1	27701033	27701569	+	66.0577	84.9396
ANn_00041953	chr1	27709196	27709831	+	23.041	6.3343
ANn_00041954	chr1	27732090	27732755	+	0	0.039064
ANn_00041955	chr1	27754450	27756867	-	3.12705	5.02018
ANn_00041956	chr1	27807922	27808539	+	0.586659	1.14301
ANn_00041957	chr1	27813022	27814446	+	16.3141	16.6608
ANn_00041958	chr1	27819523	27821381	-	0.926802	1.58548
ANn_00041959	chr1	27820199	27821208	+	2.4658	2.37535
ANn_00041960	chr1	27833707	27834180	+	0.617297	0.434492
ANn_00041961	chr1	27855771	27895220	-	0	0
ANn_00041965	chr1	27923767	27931206	-	0	0
ANn_00041966	chr1	27952857	27971447	+	0	0
ANn_00041967	chr1	27971997	27986270	-	21.4614	64.9008
ANn_00041968	chr1	27989484	27989879	+	4.02156	3.8601
ANn_00041969	chr1	28025609	28028437	+	0.409143	0.281676
ANn_00041976	chr1	28035023	28035197	+	4.77375	3.99886
ANn_00041978	chr1	28051521	28052021	-	0.378396	0
ANn_00041979	chr1	28059250	28059531	-	5.49021	3.10892
ANn_00041980	chr1	28062040	28063060	+	106.417	57.75
ANn_00041981	chr1	28068973	28069430	+	8.58226	4.94434
ANn_00041984	chr1	28094507	28094904	+	14.8102	7.77658
ANn_00041985	chr1	28135081	28135842	-	8.45536	4.92772
ANn_00041986	chr1	28144971	28153147	-	96.3134	127.6
ANn_00041987	chr1	28155849	28157258	-	2.80877	0.901866
ANn_00041988	chr1	28161853	28162252	+	1.69829	11.755
ANn_00041989	chr1	28161941	28162514	-	0	0
ANn_00041990	chr1	28167151	28177401	+	5.02343	7.36462
ANn_00041992	chr1	28191266	28193401	+	14.0248	30.6241
ANn_00041994	chr1	28206342	28213991	+	0	0
ANn_00041996	chr1	28232403	28250340	+	4.91402	4.11481
ANn_00041997	chr1	28261373	28262420	-	0.552648	0.241195
ANn_00041998	chr1	28271532	28271961	+	0.466505	1.96374
ANn_00041999	chr1	28324929	28340083	+	0	0
ANn_00042001	chr1	28345959	28348252	+	0.061858	11.1982
ANn_00042004	chr1	28365934	28395891	-	5.85178	1.50587
ANn_00042006	chr1	28405972	28489986	+	0.517147	0.131628
ANn_00042007	chr1	28493123	28495759	-	0.147495	0.336975
ANn_00042008	chr1	28541875	28542444	-	0	0
ANn_00042009	chr1	28558693	28559259	-	0	0
ANn_00042010	chr1	28563917	28565038	-	31.5479	33.2821
ANn_00042011	chr1	28593042	28593469	-	0	0
ANn_00042012	chr1	28597014	28601602	+	0	0
ANn_00042014	chr1	28649849	28651782	-	2.19969	2.2262
ANn_00042015	chr1	28671499	28671807	-	1.88858	1.01345
ANn_00042018	chr1	28680726	28681940	-	0	0
ANn_00042019	chr1	28751225	28753522	+	0	0
ANn_00042020	chr1	28761540	28763727	+	0.184918	0
ANn_00042021	chr1	28804108	28815166	+	3.38698	2.36164
ANn_00042022	chr1	28817159	28817595	-	3.64919	12.1239
ANn_00042023	chr1	28825258	28826173	+	0.125466	0.810612
ANn_00042024	chr1	28827983	28831011	-	41.012	22.7963
ANn_00042025	chr1	28831705	28833747	-	6.03975	1.09124
ANn_00042026	chr1	28836152	28842651	-	4.21568	2.03996
ANn_00042027	chr1	28869185	28872471	+	51.2666	498.685
ANn_00042028	chr1	28873955	28883005	-	65.1056	89.6751
ANn_00042029	chr1	28888183	28888551	+	14.9727	7.03126
ANn_00042030	chr1	28943088	28967194	+	0.156967	0
ANn_00042031	chr1	28972527	28984154	-	0.282607	0
ANn_00042032	chr1	28992823	28993394	+	0	0
ANn_00042033	chr1	29027451	29029384	+	0	0
ANn_00042034	chr1	29035049	29042158	+	0	0
ANn_00042035	chr1	29050091	29050685	+	0	0.01243
ANn_00042036	chr1	29064445	29066857	+	0.14784	0
ANn_00042040	chr1	29077790	29080795	+	31.2776	51.6938
ANn_00042041	chr1	29078362	29094134	-	0.387246	0.03081
ANn_00042042	chr1	29111554	29112382	+	4.91074	4.24783
ANn_00042043	chr1	29136537	29137733	+	0.396422	1.14313
ANn_00042044	chr1	29158179	29167337	+	5.84203	4.02845
ANn_00042045	chr1	29179018	29179287	-	0.294419	0
ANn_00042047	chr1	29188516	29189535	+	23.7971	15.1292
ANn_00042048	chr1	29255425	29256052	-	0.128879	0.01596
ANn_00042049	chr1	29273789	29274719	-	1.75566	0.312796
ANn_00042050	chr1	29279264	29296898	+	0.59999	0.025846
ANn_00042053	chr1	29300113	29302044	-	55.6482	103.12
ANn_00042054	chr1	29309312	29338605	-	14.4081	7.01476
ANn_00042056	chr1	29356806	29357363	+	27.0236	48.1983
ANn_00042057	chr1	29364201	29364578	-	19.3319	36.2986
ANn_00042058	chr1	29365353	29366913	-	356.373	436.202
ANn_00042059	chr1	29376666	29376926	-	0.023065	0
ANn_00042060	chr1	29419294	29424668	-	38.6739	17.1291
ANn_00042061	chr1	29425365	29425708	-	9.56369	16.7973
ANn_00042062	chr1	29451022	29451952	+	0	0.133821
ANn_00042063	chr1	29458607	29461637	+	28.7913	12.5291
ANn_00042064	chr1	29464616	29468754	-	0	0.047201
ANn_00042065	chr1	29464899	29465057	+	0.060169	0.028326
ANn_00042067	chr1	29498205	29506049	-	0	0
ANn_00042068	chr1	29526018	29538075	+	0	0
ANn_00042069	chr1	29567200	29569303	-	0	0
ANn_00042070	chr1	29613100	29614766	-	0	0
ANn_00042071	chr1	29652964	29656996	+	98.0084	49.4653
ANn_00042072	chr1	29672182	29672823	-	18.6962	25.9773
ANn_00042073	chr1	29679683	29680084	+	0	0
ANn_00042074	chr1	29710782	29713927	+	0	0
ANn_00042075	chr1	29721206	29726928	+	0	0
ANn_00042076	chr1	29734801	29736599	-	19.3953	20.8057
ANn_00042077	chr1	29737756	29744152	+	0	0.012401
ANn_00042078	chr1	29751449	29752626	-	0	0
ANn_00042079	chr1	29752334	29754300	+	16.4202	10.4569
ANn_00042081	chr1	29805555	29806904	+	109.483	105.805
ANn_00042082	chr1	29831585	29832581	+	2.74702	3.44287
ANn_00042083	chr1	29833237	29834048	+	0.331753	0.176665
ANn_00042085	chr1	29837636	29845779	+	0.178095	0
ANn_00042086	chr1	29863840	29865698	-	17.9034	20.3247
ANn_00042087	chr1	29887529	29888582	+	544.085	710.117
ANn_00042088	chr1	29890495	29891868	-	0.63964	0.856375
ANn_00042089	chr1	29955935	29958350	+	0	0
ANn_00042090	chr1	29962116	29993128	-	0	0
ANn_00042091	chr1	29962242	29963495	-	8.07781	8.18245
ANn_00042092	chr1	30010002	30012350	-	0	0
ANn_00042093	chr1	30063809	30066022	-	0	0
ANn_00042094	chr1	30071328	30074803	+	0	0
ANn_00042095	chr1	30074745	30101572	-	0	0
ANn_00042096	chr1	30095565	30096285	+	0	0
ANn_00042097	chr1	30142421	30142762	+	0	0.185251
ANn_00042098	chr1	30146506	30147121	-	0	0
ANn_00042099	chr1	30161652	30162362	+	0.0506	4.23283
ANn_00042100	chr1	30165091	30167937	+	0	0
ANn_00042101	chr1	30184827	30184901	+	0.036443	0
ANn_00042102	chr1	30209389	30252864	+	26.578	13.7789
ANn_00042104	chr1	30255413	30255850	-	9.74805	2.91446
ANn_00042105	chr1	30263298	30263816	+	6.77464	1.24385
ANn_00042106	chr1	30266750	30267835	-	0.235748	0.025444
ANn_00042107	chr1	30270334	30271053	-	4.70659	1.56748
ANn_00042108	chr1	30282603	30282920	+	1.13031	0.382859
ANn_00042110	chr1	30314722	30315434	+	0	0
ANn_00042111	chr1	30331668	30335852	+	5.65182	6.51952
ANn_00042112	chr1	30344870	30346952	-	3.22889	6.06324
ANn_00042113	chr1	30377287	30421319	+	25.8127	18.0596
ANn_00042114	chr1	30424877	30425848	-	8.30593	12.2742
ANn_00042115	chr1	30510615	30514542	+	5.78322	7.52707
ANn_00042117	chr1	30534153	30535774	-	196.48	270.932
ANn_00042118	chr1	30543466	30543830	-	1.82646	1.16434
ANn_00042120	chr1	30550519	30581370	-	3.0575	0.890155
ANn_00042121	chr1	30601921	30608264	-	2.78055	1.06239
ANn_00042122	chr1	30631393	30662253	+	0.07642	0
ANn_00042123	chr1	30655929	30656300	-	1.40347	1.26137
ANn_00042124	chr1	30662488	30662883	-	0.682567	0.357395
ANn_00042125	chr1	30672309	30696630	+	0.333761	0.137399
ANn_00042126	chr1	30698067	30698793	-	13.9516	20.7399
ANn_00042127	chr1	30713728	30715360	+	0	0.042664
ANn_00042128	chr1	30719801	30736452	-	18.0821	12.7255
ANn_00042129	chr1	30744095	30756821	-	0	0
ANn_00042131	chr1	30795920	30816249	+	27.9788	60.7415
ANn_00042132	chr1	30818461	30820052	+	20.9659	14.1145
ANn_00042133	chr1	30863858	30877288	+	5.43647	3.45204
ANn_00042134	chr1	30881262	30882988	-	0.387864	0.050867
ANn_00042135	chr1	30886438	30886746	-	54.8113	44.4037
ANn_00042136	chr1	30896417	30901558	+	0.163013	0.721479
ANn_00042137	chr1	30905303	30908828	+	14.9823	19.1391
ANn_00042138	chr1	30913085	30918089	-	6.67197	20.2899
ANn_00042139	chr1	30940784	30960262	-	0	0
ANn_00042140	chr1	31002548	31003890	+	0	0
ANn_00042141	chr1	31051214	31077672	+	0.369515	0.971201
ANn_00042142	chr1	31079954	31082320	+	7.23401	15.9829
ANn_00042143	chr1	31105447	31123969	+	2.20491	1.6324
ANn_00042144	chr1	31128749	31134074	-	4.63131	4.2983
ANn_00042145	chr1	31174567	31211284	-	83.6925	93.8662
ANn_00042146	chr1	31261896	31276725	+	1.06095	0.498721
ANn_00042147	chr1	31277899	31289556	-	3.54964	0.601255
ANn_00042150	chr1	31466267	31468372	-	23.9636	13.2102
ANn_00042151	chr1	31469757	31470881	+	44.9854	57.5871
ANn_00042152	chr1	31490028	31493139	+	0.213152	0
ANn_00042153	chr1	31512985	31514155	+	0.921645	0.718319
ANn_00042154	chr1	31538890	31539626	+	1.78772	1.82027
ANn_00042155	chr1	31552754	31565680	+	25.7889	23.3635
ANn_00042156	chr1	31569230	31572342	-	24.1958	43.5186
ANn_00042157	chr1	31619327	31642930	-	5.58703	10.7071
ANn_00042158	chr1	31643017	31659478	-	0	0
ANn_00042159	chr1	31644321	31651596	+	27.4877	25.1315
ANn_00042160	chr1	31672493	31685256	+	8.031	9.40152
ANn_00042162	chr1	31686326	31686652	-	1.56402	2.09366
ANn_00042163	chr1	31694090	31694671	+	0	0
ANn_00042164	chr1	31714441	31715473	-	80.1243	122.904
ANn_00042165	chr1	31751817	31761802	+	4.3489	0.692406
ANn_00042166	chr1	31774400	31774681	-	31.418	37.2888
ANn_00042167	chr1	31781007	31783129	+	0	0
ANn_00042169	chr1	31787123	31789001	+	1.56012	0.731171
ANn_00042170	chr1	31810288	31847073	+	0	0
ANn_00042171	chr1	31857234	31867067	-	0.014663	0.057236
ANn_00042172	chr1	31869163	31869481	-	0	0
ANn_00042173	chr1	31891096	31892349	-	0	0
ANn_00042174	chr1	31949314	31981060	+	0.005211	0.012012
ANn_00042175	chr1	31952208	31953093	+	0	0
ANn_00042176	chr1	31982321	31984794	+	0	0
ANn_00042177	chr1	31998051	31999763	-	0.033007	0
ANn_00042179	chr1	32012778	32022349	-	0	0
ANn_00042181	chr1	32027893	32034493	-	0	0
ANn_00042182	chr1	32039909	32040361	-	0.469864	0.344696
ANn_00042183	chr1	32055314	32055521	+	0.749624	0.101479
ANn_00042184	chr1	32059280	32063302	-	80.1965	64.9548
ANn_00042185	chr1	32080426	32082481	-	0	0
ANn_00042186	chr1	32085322	32094391	-	0	0
ANn_00042187	chr1	32201654	32227657	-	0	0
ANn_00042189	chr1	32232776	32234594	-	0.236211	0.130198
ANn_00042190	chr1	32244562	32246659	-	25.7448	36.6408
ANn_00042191	chr1	32248601	32253110	-	1.31235	1.10356
ANn_00042193	chr1	32275372	32298404	-	0.326549	2.14688
ANn_00042194	chr1	32296792	32297566	-	0	0
ANn_00042195	chr1	32325927	32339951	+	0	0.067583
ANn_00042196	chr1	32343386	32343828	+	54.6315	179.838
ANn_00042197	chr1	32348401	32361287	-	0	0.078044
ANn_00042200	chr1	32358199	32359676	+	0	0
ANn_00042201	chr1	32368274	32370641	-	8.87166	4.59028
ANn_00042202	chr1	32395036	32419145	-	0	0
ANn_00042203	chr1	32429454	32449795	+	1.02843	0
ANn_00042205	chr1	32453073	32454901	+	0	0
ANn_00042206	chr1	32455244	32466425	-	17.892	22.4614
ANn_00042207	chr1	32504460	32506168	+	0	0
ANn_00042208	chr1	32522192	32530863	-	11.766	35.585
ANn_00042211	chr1	32545874	32547874	+	0	0
ANn_00042212	chr1	32554226	32555863	-	0	0.126251
ANn_00042213	chr1	32564538	32565835	+	0	0
ANn_00042214	chr1	32569054	32602660	-	0	0
ANn_00042215	chr1	32583170	32584136	-	81.5919	103.212
ANn_00042216	chr1	32625969	32639706	-	0	0
ANn_00042217	chr1	32692975	32694262	+	0.158377	36.8513
ANn_00042218	chr1	32695782	32696169	+	0	0
ANn_00042219	chr1	32696522	32696705	+	18.3088	22.7303
ANn_00042220	chr1	32700143	32700578	-	0	0
ANn_00042222	chr1	32702960	32703241	+	0.069539	39.2475
ANn_00042223	chr1	32725586	32757700	+	10.5974	8.9876
ANn_00042225	chr1	32766851	32769034	-	4.70749	2.07297
ANn_00042226	chr1	32776774	32777289	-	2.69884	1.11646
ANn_00042227	chr1	32787636	32787955	-	1.78356	0.392207
ANn_00042228	chr1	32811588	32814287	+	100.486	52.6049
ANn_00042229	chr1	32815986	32818140	-	0	0
ANn_00042230	chr1	32838189	32842350	-	1.04111	0.601207
ANn_00042231	chr1	32866158	32867194	-	15.4412	19.1296
ANn_00042232	chr1	32869211	32876713	+	3.18275	2.31052
ANn_00042233	chr1	32877679	32878127	+	0	0.025488
ANn_00042234	chr1	32878696	32879151	-	0	0.052314
ANn_00042235	chr1	32898116	32914597	+	6.39842	5.81187
ANn_00042236	chr1	32916480	32917712	+	34.465	16.8446
ANn_00042237	chr1	32950849	32951513	+	13.7583	27.1628
ANn_00042238	chr1	32956182	32964092	+	3.18945	3.79641
ANn_00042239	chr1	32985077	32996835	+	15.9372	6.09026
ANn_00042240	chr1	33042497	33043033	-	0	0
ANn_00042241	chr1	33049081	33049668	-	54.1726	52.8203
ANn_00042242	chr1	33051295	33051771	-	0	0
ANn_00042243	chr1	33065973	33066395	-	0	0
ANn_00042244	chr1	33075972	33076406	-	0	0
ANn_00042245	chr1	33087867	33094236	-	0	0
ANn_00042246	chr1	33156729	33232660	-	0.538786	0.818962
ANn_00042247	chr1	33230480	33231188	+	0.513278	0.365616
ANn_00042248	chr1	33235767	33244634	-	0.514409	0.27715
ANn_00042249	chr1	33246632	33248048	+	0	0
ANn_00042251	chr1	33247147	33248015	-	0	0.070058
ANn_00042253	chr1	33276947	33281927	-	25.2947	13.0108
ANn_00042254	chr1	33380955	33397792	-	38.2353	64.0763
ANn_00042255	chr1	33413378	33414010	+	3.15923	7.56392
ANn_00042256	chr1	33428296	33451304	-	0.069273	0
ANn_00042257	chr1	33470061	33471633	-	3.46765	1.80514
ANn_00042258	chr1	33506184	33507724	+	0.565839	0.458014
ANn_00042260	chr1	33596463	33605385	+	0.079286	0.005658
ANn_00042261	chr1	33598561	33600251	+	0.444739	0.490097
ANn_00042262	chr1	33621672	33624461	+	0	0
ANn_00042263	chr1	33630962	33636557	+	0.195387	0.409826
ANn_00042264	chr1	33671615	33673793	+	0	0
ANn_00042265	chr1	33729069	33729855	+	0	0
ANn_00042266	chr1	33734288	33734797	-	0	0
ANn_00042267	chr1	33735127	33735397	+	0	0
ANn_00042268	chr1	33737838	33750143	+	0	0
ANn_00042269	chr1	33765455	33765946	+	0	0
ANn_00042270	chr1	33769850	33771170	-	0	0.057539
ANn_00042271	chr1	33785904	33787415	-	0	0
ANn_00042272	chr1	33792863	33816063	-	0	0
ANn_00042273	chr1	33830804	33831259	+	0	0
ANn_00042274	chr1	33833472	33835046	-	0	0
ANn_00042275	chr1	33849167	33851733	+	0	0
ANn_00042276	chr1	33852959	33854232	-	0	0
ANn_00042277	chr1	33881724	33882029	-	0.093677	0.257133
ANn_00042278	chr1	33888212	33888547	-	0	0
ANn_00042279	chr1	33889725	33890078	+	0	0
ANn_00042280	chr1	33892295	33895149	-	0	0.327134
ANn_00042282	chr1	33908132	34096652	-	0	0
ANn_00042283	chr1	33958945	33959402	-	31.2352	147.117
ANn_00042284	chr1	34117533	34118859	+	0	2.88804
ANn_00042285	chr1	34136267	34138350	-	0	1.73252
ANn_00042286	chr1	34164171	34165352	+	7.53033	3.5259
ANn_00042287	chr1	34167523	34167894	-	0.331402	1.31456
ANn_00042288	chr1	34167547	34167627	+	0	0
ANn_00042289	chr1	34195134	34196414	-	32.0687	39.4755
ANn_00042290	chr1	34283376	34284236	-	0.697562	2.06002
ANn_00042291	chr1	34292207	34292924	+	0	0.056492
ANn_00042292	chr1	34294945	34365030	+	0	0
ANn_00042293	chr1	34305154	34306810	+	1.34415	2.00191
ANn_00042294	chr1	34369184	34369894	+	9.05053	4.66574
ANn_00042295	chr1	34395354	34439483	+	0.850545	1.16078
ANn_00042296	chr1	34444432	34445817	+	0	0
ANn_00042297	chr1	34449268	34452439	+	2.49774	2.82394
ANn_00042298	chr1	34510238	34511384	-	0.046102	0.018826
ANn_00042299	chr1	34512757	34516074	+	18.9136	25.0688
ANn_00042300	chr1	34520652	34521032	-	22.9402	20.787
ANn_00042302	chr1	34527988	34533420	-	0	0.028536
ANn_00042303	chr1	34536190	34587896	-	0	0
ANn_00042304	chr1	34549747	34557099	+	52.7623	39.7829
ANn_00042305	chr1	34598608	34598940	+	5.71227	6.68461
ANn_00042306	chr1	34621765	34622563	-	0	0
ANn_00042307	chr1	34683712	34684888	-	0	0
ANn_00042308	chr1	34721667	34722101	+	16.239	11.9793
ANn_00042310	chr1	34734895	34735908	+	0.034245	0.599074
ANn_00042311	chr1	34770930	34773429	+	1.31512	1.65601
ANn_00042312	chr1	34779859	34784262	+	0.025271	0
ANn_00042313	chr1	34786661	34788490	+	0.082169	0
ANn_00042314	chr1	34789001	34818956	-	0	0
ANn_00042316	chr1	34834337	34836303	+	0.101276	0
ANn_00042317	chr1	34843859	34860756	+	0	0
ANn_00042318	chr1	34871662	34881423	+	0	0
ANn_00042319	chr1	34884803	34885129	-	0	0
ANn_00042321	chr1	34899611	34900429	+	0.813848	0.658712
ANn_00042322	chr1	34902676	34903002	-	2.2104	0.619954
ANn_00042324	chr1	34919124	34922255	-	0.024945	0
ANn_00042325	chr1	34924694	34925350	+	0	0
ANn_00042326	chr1	34926761	34927105	+	0	0
ANn_00042327	chr1	34942905	34966881	+	0.114067	0.122314
ANn_00042328	chr1	34969099	34987251	-	0.599144	1.13521
ANn_00042329	chr1	34990132	35010931	-	13.4141	12.8602
ANn_00042330	chr1	34996349	34998901	+	0	0.191973
ANn_00042331	chr1	34999158	34999500	+	0.085972	0
ANn_00042332	chr1	35067559	35069505	-	0	0
ANn_00042333	chr1	35075052	35076700	+	0.096489	0.126072
ANn_00042334	chr1	35091604	35159870	+	2.55058	4.79241
ANn_00042335	chr1	35160913	35167715	-	19.5859	32.0252
ANn_00042336	chr1	35170165	35171581	-	14.6305	22.9788
ANn_00042337	chr1	35184638	35185341	-	4.0346	5.60037
ANn_00042338	chr1	35186773	35187284	+	0	0
ANn_00042339	chr1	35191475	35194132	-	0	0.011385
ANn_00042340	chr1	35218916	35226619	-	4.93169	2.41093
ANn_00042341	chr1	35230663	35231363	-	2.40722	5.18767
ANn_00042343	chr1	35266706	35267714	+	0	0
ANn_00042344	chr1	35270153	35271732	+	0	0
ANn_00042345	chr1	35277493	35277939	+	0	0
ANn_00042346	chr1	35283903	35285202	-	0	0
ANn_00042347	chr1	35311842	35325369	+	0	0
ANn_00042348	chr1	35329520	35331412	-	0	0
ANn_00042349	chr1	35339751	35351383	-	0	0.09487
ANn_00042350	chr1	35356456	35359453	-	3.18223	2.57533
ANn_00042351	chr1	35365912	35367606	-	4.45886	4.8635
ANn_00042352	chr1	35371295	35376313	-	0	0
ANn_00042353	chr1	35392356	35449788	-	0	0
ANn_00042354	chr1	35475521	35477230	+	0.25607	0.003761
ANn_00042355	chr1	35488796	35489353	+	15.0222	10.9392
ANn_00042356	chr1	35492995	35496119	-	3.1107	3.99902
ANn_00042357	chr1	35535297	35541930	-	29.3882	44.0207
ANn_00042358	chr1	35545555	35547266	-	0	0
ANn_00042359	chr1	35548860	35565159	-	33.622	47.7951
ANn_00042360	chr1	35633433	35635065	-	0	0
ANn_00042361	chr1	35635802	35638734	+	0	0
ANn_00042362	chr1	35642047	35644747	-	300.401	264.441
ANn_00042364	chr1	35648490	35650121	-	3.0414	4.47133
ANn_00042366	chr1	35673208	35682217	+	6.32204	5.77303
ANn_00042367	chr1	35722676	35743050	+	15.1048	12.1033
ANn_00042368	chr1	35749042	35751804	+	44.4458	4.9451
ANn_00042369	chr1	35758863	35762898	+	5.78897	5.78633
ANn_00042371	chr1	35829760	35834736	+	0.00256	0.024309
ANn_00042372	chr1	35914971	35915534	-	3.8672	3.63553
ANn_00042373	chr1	35977782	35979792	-	7.43947	3.45476
ANn_00042374	chr1	36023317	36024096	+	34.4522	27.1417
ANn_00042375	chr1	36153954	36184117	-	17.0071	7.54471
ANn_00042377	chr1	36211152	36236608	-	0	0
ANn_00042378	chr1	36263402	36285044	-	1.75765	1.41755
ANn_00042379	chr1	36313450	36318346	-	0	0
ANn_00042380	chr1	36349828	36366045	+	1.76008	0.858802
ANn_00042381	chr1	36353414	36354283	+	0	0
ANn_00042382	chr1	36414088	36429146	+	0	0.060149
ANn_00042383	chr1	36453700	36454921	-	40.5739	65.3757
ANn_00042384	chr1	36481728	36483082	+	13.8501	18.9826
ANn_00042385	chr1	36487062	36487887	-	0.17878	0.119016
ANn_00042387	chr1	36532015	36534701	+	0.585378	0.979064
ANn_00042388	chr1	36536356	36537619	-	2.33361	1.1932
ANn_00042390	chr1	36537643	36539399	+	1.70775	1.65083
ANn_00042391	chr1	36538036	36538191	-	70.2051	195.378
ANn_00042392	chr1	36552138	36553031	+	7.47378	4.4544
ANn_00042393	chr1	36559121	36566610	-	0	0
ANn_00042394	chr1	36568598	36573001	-	38.6953	22.8688
ANn_00042395	chr1	36568679	36569298	+	0	0
ANn_00042396	chr1	36598843	36601028	+	0.065515	0
ANn_00042397	chr1	36603611	36605544	+	0	0
ANn_00042398	chr1	36605396	36613481	-	0	0
ANn_00042399	chr1	36614358	36656512	-	7.92249	4.84922
ANn_00042401	chr1	36691690	36695300	+	2.18713	3.05212
ANn_00042402	chr1	36764733	36780101	+	0	0
ANn_00042404	chr1	36787287	36788756	+	0	0
ANn_00042405	chr1	36793553	36794426	+	0	0
ANn_00042406	chr1	36832657	36833100	-	0	0
ANn_00042407	chr1	36857060	36857722	+	0	0
ANn_00042409	chr1	36863255	36863888	+	0	0
ANn_00042410	chr1	36866870	36867932	+	0	0
ANn_00042411	chr1	36878507	36879986	+	0	0
ANn_00042413	chr1	36881202	36882262	+	0	0
ANn_00042414	chr1	36911697	36921016	+	9.58173	8.5559
ANn_00042415	chr1	36952070	36982571	+	24.7083	12.9395
ANn_00042418	chr1	37011602	37014769	+	0	0.009
ANn_00042419	chr1	37019404	37025984	-	0.050158	0
ANn_00042420	chr1	37052616	37054356	+	0	0
ANn_00042421	chr1	37073399	37075297	-	0.220477	0
ANn_00042422	chr1	37121749	37122828	+	0.31978	0.047782
ANn_00042423	chr1	37139712	37140010	+	0	0
ANn_00042424	chr1	37178268	37178426	+	0	0
ANn_00042425	chr1	37202582	37203079	+	0.209085	0.791771
ANn_00042427	chr1	37276176	37276826	+	85.5452	38.9643
ANn_00042428	chr1	37282683	37287776	+	2.2896	1.53172
ANn_00042429	chr1	37291113	37292443	+	69.7871	103.683
ANn_00042430	chr1	37316352	37318148	-	0	0
ANn_00042431	chr1	37340513	37343610	+	2.03195	3.39875
ANn_00042432	chr1	37345588	37345761	-	0.00759	0.026026
ANn_00042433	chr1	37346262	37451451	-	0	0
ANn_00042434	chr1	37458302	37460641	-	0	0
ANn_00042435	chr1	37510311	37513163	+	0	0
ANn_00042436	chr1	37533303	37534564	+	1.76935	1.27965
ANn_00042438	chr1	37542199	37543503	+	0.032072	0.118555
ANn_00042439	chr1	37558987	37560280	+	0	0
ANn_00042440	chr1	37564360	37564821	-	4.68101	7.08006
ANn_00042441	chr1	37590150	37591631	+	0.065106	0
ANn_00042442	chr1	37605672	37607117	+	0	0
ANn_00042443	chr1	37607479	37608250	-	0.522817	0.772274
ANn_00042444	chr1	37641333	37645789	+	0	0
ANn_00042445	chr1	37671408	37671575	-	0	0
ANn_00042446	chr1	37673434	37685741	+	0	0
ANn_00042447	chr1	37707975	37710636	-	0.043233	0.408192
ANn_00042448	chr1	37766462	37769982	-	169.527	220.361
ANn_00042449	chr1	37800058	37801345	-	3.43842	2.54234
ANn_00042450	chr1	37804871	37856113	-	0.949578	0
ANn_00042451	chr1	37872608	37873553	+	1.56669	0.458278
ANn_00042452	chr1	37876384	37878421	+	90.6298	146.682
ANn_00042453	chr1	37912950	37916105	-	7.68415	8.79662
ANn_00042454	chr1	37914707	37915292	+	0	0
ANn_00042455	chr1	37919018	37920887	+	0	0
ANn_00042459	chr1	37927474	37988010	+	1.5465	1.20657
ANn_00042460	chr1	37933606	37933929	-	0	0
ANn_00042463	chr1	37989552	38059346	-	0	0
ANn_00042466	chr1	38087203	38087525	+	0	0
ANn_00042467	chr1	38092426	38094729	+	0	0.231079
ANn_00042468	chr1	38135113	38137030	+	3.51337	2.86366
ANn_00042469	chr1	38152715	38157418	-	0.149783	0
ANn_00042470	chr1	38162468	38163946	+	12.2738	8.53621
ANn_00042471	chr1	38177224	38178587	-	12.7107	11.1251
ANn_00042472	chr1	38181985	38182206	-	0	0
ANn_00042473	chr1	38183514	38186415	+	0	0
ANn_00042474	chr1	38188423	38239190	+	0	0
ANn_00042475	chr1	38240616	38241314	-	0	0
ANn_00042476	chr1	38244258	38264300	-	0	0
ANn_00042477	chr1	38303524	38304564	-	0.022335	0.066324
ANn_00042478	chr1	38329808	38332174	-	19.7698	19.5587
ANn_00042480	chr1	38338350	38341529	+	0	0
ANn_00042481	chr1	38343065	38343477	+	63.8211	92.9158
ANn_00042483	chr1	38345352	38346109	+	0.063595	0
ANn_00042484	chr1	38345885	38346252	-	2.72034	3.65878
ANn_00042485	chr1	38347265	38350124	-	0	0
ANn_00042486	chr1	38368399	38373001	+	0	0
ANn_00042487	chr1	38391281	38392338	+	0	0
ANn_00042488	chr1	38399379	38399594	+	0	0
ANn_00042489	chr1	38400413	38401390	-	0.005062	0.008027
ANn_00042490	chr1	38417174	38418068	-	0.036551	0.05622
ANn_00042491	chr1	38436675	38442340	-	0	0
ANn_00042492	chr1	38471364	38473476	+	0	0
ANn_00042493	chr1	38486511	38491658	-	0	0
ANn_00042494	chr1	38518718	38519755	+	0	0
ANn_00042495	chr1	38522797	38523546	-	0	0
ANn_00042496	chr1	38534279	38534863	+	0.041905	0
ANn_00042498	chr1	38544327	38544500	-	27.0396	29.3605
ANn_00042500	chr1	38597628	38600460	-	27.3535	62.9778
ANn_00042501	chr1	38656810	38657714	-	0	0
ANn_00042502	chr1	38661766	38662189	+	0.353504	0.022512
ANn_00042503	chr1	38664053	38666082	+	0.660142	1.20216
ANn_00042504	chr1	38671146	38672741	+	5.91955	10.9912
ANn_00042505	chr1	38697398	38698030	+	0	0
ANn_00042506	chr1	38712970	38743107	+	0	0
ANn_00042507	chr1	38746644	38746823	-	9.78305	20.5313
ANn_00042508	chr1	38754901	38755302	+	0	0
ANn_00042509	chr1	38754978	38755580	-	1.22797	1.28751
ANn_00042510	chr1	38773322	38773750	-	0	0
ANn_00042511	chr1	38790416	38790937	+	1.38654	0.513474
ANn_00042512	chr1	38795341	38797090	+	3.89525	5.49666
ANn_00042513	chr1	38796349	38808787	-	6.05739	5.98108
ANn_00042514	chr1	38808182	38808580	+	0	0
ANn_00042515	chr1	38820298	38820678	-	0	0
ANn_00042516	chr1	38856071	38859913	+	14.1691	20.3645
ANn_00042517	chr1	38858798	38859143	-	23.8832	26.2328
ANn_00042518	chr1	38858899	38859029	+	0	0
ANn_00042519	chr1	38881724	38886621	+	0	0
ANn_00042521	chr1	38902069	38902775	+	50.615	49.7599
ANn_00042523	chr1	38910379	38927181	-	0	0
ANn_00042524	chr1	38932755	38933129	+	9.35371	20.2624
ANn_00042525	chr1	38959717	38988038	-	1.90783	0
ANn_00042526	chr1	39000719	39000974	+	0.024248	0
ANn_00042528	chr1	39001007	39003010	+	0	0
ANn_00042530	chr1	39026336	39027156	-	14.1814	6.29409
ANn_00042531	chr1	39042244	39043125	+	0.772188	0.221855
ANn_00042532	chr1	39048663	39065062	-	0.93112	0.289919
ANn_00042534	chr1	39069754	39070271	+	5.53896	7.39291
ANn_00042535	chr1	39109421	39112594	-	0	0
ANn_00042536	chr1	39174300	39176536	+	0.188795	0.364751
ANn_00042537	chr1	39198806	39200482	-	0.420773	0.147122
ANn_00042538	chr1	39269055	39269928	+	12.9309	6.3538
ANn_00042539	chr1	39292747	39295027	+	0	0
ANn_00042540	chr1	39297135	39298535	+	1.94149	0.873961
ANn_00042541	chr1	39359629	39360015	-	3.04851	5.33517
ANn_00042542	chr1	39361974	39366590	+	0	0
ANn_00042543	chr1	39402031	39406905	+	1.59792	0.100544
ANn_00042544	chr1	39434326	39434721	+	0	0
ANn_00042546	chr1	39434819	39435178	+	16.156	12.5059
ANn_00042548	chr1	39443606	39445108	+	494.061	618.099
ANn_00042549	chr1	39445578	39446050	-	8.95251	8.12432
ANn_00042550	chr1	39465678	39466694	-	24.4982	9.75651
ANn_00042551	chr1	39501857	39510846	-	0	0
ANn_00042552	chr1	39527569	39530657	-	0	0
ANn_00042554	chr1	39582289	39585292	+	43.4989	20.7097
ANn_00042555	chr1	39602088	39603148	+	0	0
ANn_00042556	chr1	39609208	39609708	+	2.00475	1.64498
ANn_00042557	chr1	39612075	39613866	-	3.85502	0.580969
ANn_00042559	chr1	39612095	39613063	+	9.42715	4.30931
ANn_00042560	chr1	39617789	39619566	+	0	0
ANn_00042561	chr1	39623426	39629539	-	0.645723	0
ANn_00042562	chr1	39629540	39629826	+	16.057	22.9081
ANn_00042563	chr1	39630686	39631981	+	1.6618	3.54626
ANn_00042564	chr1	39645511	39648090	-	206.407	260.396
ANn_00042565	chr1	39661133	39663025	-	0	0
ANn_00042566	chr1	39678501	39680654	+	566.679	597.175
ANn_00042567	chr1	39702256	39712566	+	0	0.198814
ANn_00042568	chr1	39759572	39763269	+	32.1637	24.7828
ANn_00042569	chr1	39768012	39772709	+	0	0
ANn_00042571	chr1	39788254	39788886	-	1.0506	0.236365
ANn_00042572	chr1	39898047	39898661	+	0.682841	0.048249
ANn_00042573	chr1	39943350	39943631	-	0.357679	0.064765
ANn_00042575	chr1	39968372	39969085	-	0.768828	0.239876
ANn_00042576	chr1	39973821	39975491	-	0	0.125704
ANn_00042577	chr1	39982831	39983114	+	0	0
ANn_00042578	chr1	40002465	40003501	-	1.82231	2.89022
ANn_00042579	chr1	40020635	40021548	+	0	0
ANn_00042580	chr1	40025589	40028355	+	20.5798	19.1092
ANn_00042581	chr1	40051164	40052198	+	1.06909	0.93199
ANn_00042583	chr1	40069977	40070774	+	9.86589	13.6844
ANn_00042584	chr1	40079897	40081074	-	0	0
ANn_00042586	chr1	40209204	40211692	-	0	0
ANn_00042587	chr1	40264466	40274075	-	0	0.219535
ANn_00042588	chr1	40280081	40280406	-	0	0
ANn_00042591	chr1	40288863	40290597	+	14.8065	18.8497
ANn_00042593	chr1	40292559	40293198	-	0	0
ANn_00042594	chr1	40296030	40297340	+	289.438	355.595
ANn_00042595	chr1	40300737	40301069	-	2.16509	2.27367
ANn_00042596	chr1	40335665	40336003	-	0.195107	0.050438
ANn_00042597	chr1	40360803	40363613	-	0.037262	0
ANn_00042598	chr1	40388434	40453076	+	0.214298	0.055681
ANn_00042599	chr1	40506266	40506867	+	0.609322	0.978534
ANn_00042600	chr1	40507251	40509424	+	0	0
ANn_00042603	chr1	40509525	40510229	+	0	0.044479
ANn_00042604	chr1	40518731	40522300	+	0.913721	1.74931
ANn_00042605	chr1	40550269	40552089	+	0	0
ANn_00042606	chr1	40591633	40596199	-	4.49335	2.85878
ANn_00042607	chr1	40625160	40625514	-	0	0
ANn_00042608	chr1	40630387	40631390	+	0	0
ANn_00042609	chr1	40636729	40638924	-	0	0
ANn_00042610	chr1	40690350	40755378	+	0.654041	0.122983
ANn_00042611	chr1	40757389	40758965	-	27.7035	4.76634
ANn_00042612	chr1	40760477	40762992	-	0	0
ANn_00042613	chr1	40795965	40800363	-	0	0
ANn_00042614	chr1	40806445	40813542	+	17.5376	26.6916
ANn_00042615	chr1	40903523	40906426	+	22.8589	27.054
ANn_00042616	chr1	40921098	40929189	-	0	0
ANn_00042617	chr1	41097027	41098529	-	0	0
ANn_00042618	chr1	41166870	41169164	-	0.20885	0.045194
ANn_00042619	chr1	41192835	41195483	+	0	0.067946
ANn_00042620	chr1	41201522	41204278	+	0	0
ANn_00042622	chr1	41238019	41239008	-	0	0.068062
ANn_00042623	chr1	41242442	41245572	-	0	0
ANn_00042626	chr1	41291356	41308169	+	5.41995	3.70698
ANn_00042627	chr1	41309715	41397680	-	193.99	255.393
ANn_00042628	chr1	41389994	41391058	-	0	0
ANn_00042629	chr1	41423909	41425186	+	0	0
ANn_00042630	chr1	41433126	41434187	+	17.1883	16.0922
ANn_00042631	chr1	41434726	41436978	-	2.14849	2.1146
ANn_00042633	chr1	41434890	41436939	+	24.5326	28.0055
ANn_00042635	chr1	41450309	41453069	+	0	0
ANn_00042636	chr1	41475891	41476490	-	0	0
ANn_00042637	chr1	41480199	41482934	-	0	0
ANn_00042638	chr1	41513492	41516064	+	0	0
ANn_00042639	chr1	41525309	41540015	+	92.6243	85.4116
ANn_00042640	chr1	41560557	41561117	+	19.9425	38.0532
ANn_00042642	chr1	41562233	41563666	-	0	0
ANn_00042643	chr1	41584245	41586464	-	0	0
ANn_00042644	chr1	41592125	41592501	+	0	0
ANn_00042645	chr1	41594276	41594440	+	0	0
ANn_00042646	chr1	41598476	41598872	-	9.02716	4.96222
ANn_00042647	chr1	41624647	41755171	+	15.257	14.912
ANn_00042649	chr1	41758053	41759280	-	22.638	22.2617
ANn_00042650	chr1	41760785	41761092	+	0.058293	0.092668
ANn_00042654	chr1	41761209	41798806	-	2.31942	2.72478
ANn_00042655	chr1	41835601	41837049	+	16.0195	19.6745
ANn_00042656	chr1	41845086	41852914	+	13.2971	7.59797
ANn_00042659	chr1	41874840	41875127	-	0	0
ANn_00042660	chr1	41875303	41875872	-	13.465	19.168
ANn_00042661	chr1	41876064	41876651	-	0	0
ANn_00042663	chr1	41889525	41895923	-	3.89882	5.07735
ANn_00042664	chr1	41901731	41920077	+	0	0
ANn_00042665	chr1	41927423	41929450	-	25.6839	28.4102
ANn_00042667	chr1	41931765	41935775	-	0.059864	0
ANn_00042669	chr1	41971865	42042144	-	5.39453	4.78251
ANn_00042670	chr1	42080074	42081100	-	35.5466	40.0895
ANn_00042671	chr1	42087180	42088159	-	0	0
ANn_00042672	chr1	42091460	42106376	-	45.7229	17.2067
ANn_00042673	chr1	42113389	42114828	+	0	0
ANn_00042674	chr1	42127448	42142062	+	0	0.037591
ANn_00042676	chr1	42154863	42156254	-	52.8759	90.5429
ANn_00042677	chr1	42161178	42188394	-	0.593187	0.655354
ANn_00042678	chr1	42200597	42201226	-	0.313985	0
ANn_00042679	chr1	42256823	42259207	-	9.75038	14.3607
ANn_00042680	chr1	42285336	42286504	-	13.2018	28.0332
ANn_00042681	chr1	42314202	42315624	-	0	0
ANn_00042682	chr1	42335353	42341708	+	1.81679	4.34889
ANn_00042683	chr1	42358340	42358675	+	0.787273	0.990602
ANn_00042684	chr1	42366927	42367524	-	0.150748	0.120172
ANn_00042686	chr1	42401996	42404078	-	22.6524	61.1722
ANn_00042687	chr1	42405274	42407599	+	17.001	49.5034
ANn_00042688	chr1	42410518	42410951	-	1.23004	5.09577
ANn_00042690	chr1	42413432	42416601	+	0.021801	0.890486
ANn_00042691	chr1	42420742	42439128	-	0	0
ANn_00042693	chr1	42490739	42512791	+	0	0
ANn_00042694	chr1	42508003	42508983	+	0.033819	0.875984
ANn_00042695	chr1	42519208	42529898	+	0	0
ANn_00042696	chr1	42551720	42556122	+	0.252496	1.15811
ANn_00042697	chr1	42556772	42557788	-	0	0
ANn_00042698	chr1	42560443	42561046	+	0	0
ANn_00042699	chr1	42561916	42563376	-	0	0
ANn_00042700	chr1	42568847	42579430	+	0.749419	9.58474
ANn_00042702	chr1	42583219	42588610	+	0	6.47927
ANn_00042704	chr1	42641034	42649276	+	0	0
ANn_00042705	chr1	42657045	42674751	-	0	0
ANn_00042706	chr1	42682104	42711044	-	0	0
ANn_00042709	chr1	42721430	42721719	-	0.021776	0.810712
ANn_00042710	chr1	42730090	42737619	+	0.024867	0
ANn_00042711	chr1	42744545	42748340	-	0	0
ANn_00042712	chr1	42779116	42779712	-	0	0
ANn_00042713	chr1	42781274	42789954	+	0.059553	0
ANn_00042714	chr1	42787550	42788939	-	0.052134	2.62702
ANn_00042715	chr1	42791111	42791878	+	83.2219	36.7063
ANn_00042718	chr1	42794224	42795105	+	0	0
ANn_00042719	chr1	42795609	42800559	+	27.3543	35.6431
ANn_00042720	chr1	42801244	42801822	+	0.075925	0
ANn_00042722	chr1	42801825	42802202	+	0	0
ANn_00042723	chr1	42804076	42815694	-	0	0
ANn_00042725	chr1	42815282	42818599	+	0	0
ANn_00042728	chr1	42819823	42821258	-	54.4078	35.9056
ANn_00042729	chr1	42837580	42841337	-	0	0
ANn_00042730	chr1	42854582	42855311	+	0	0
ANn_00042732	chr1	42874355	42877179	+	0	0
ANn_00042733	chr1	42878664	42879536	-	5.16287	3.21979
ANn_00042735	chr1	42891982	42893065	-	15.3059	9.74802
ANn_00042736	chr1	42893021	42893366	+	33.746	38.9548
ANn_00042737	chr1	42893258	42894725	-	2.02983	3.40227
ANn_00042738	chr1	42906125	42908066	-	0.426923	0.24234
ANn_00042739	chr1	42954901	42955582	-	0	0
ANn_00042741	chr1	42957016	42961376	-	0.075624	0
ANn_00042742	chr1	42983398	42986382	+	0	0
ANn_00042744	chr1	42991046	42995493	-	40.4705	29.0623
ANn_00042746	chr1	43001861	43012236	-	0.110216	0.11103
ANn_00042747	chr1	43027042	43028204	-	1.46644	2.43403
ANn_00042750	chr1	43033413	43039192	+	0.508241	2.12668
ANn_00042752	chr1	43054363	43057394	-	3.06399	14.9141
ANn_00042754	chr1	43070583	43104173	-	56.9465	40.7201
ANn_00042755	chr1	43106554	43106922	-	0	0
ANn_00042756	chr1	43126511	43146157	-	4.29638	7.50936
ANn_00042757	chr1	43151318	43152216	-	0.450846	1.68617
ANn_00042758	chr1	43164033	43166464	+	4.27456	1.59503
ANn_00042759	chr1	43164588	43164855	-	7.10958	8.85743
ANn_00042760	chr1	43177455	43178641	+	0	0.406287
ANn_00042761	chr1	43184924	43185967	+	0.426911	0.272352
ANn_00042762	chr1	43223601	43235307	+	74.7157	62.7517
ANn_00042763	chr1	43233028	43235430	-	0	0
ANn_00042764	chr1	43289819	43319248	+	3.4254	0.143146
ANn_00042765	chr1	43326962	43335471	+	0	0
ANn_00042766	chr1	43328943	43329753	+	12.3661	4.78981
ANn_00042768	chr1	43339861	43357671	-	0	0
ANn_00042770	chr1	43369058	43374414	+	116.31	160.562
ANn_00042772	chr1	43370065	43374662	-	6.20138	5.53603
ANn_00042773	chr1	43380764	43416313	+	0	0
ANn_00042774	chr1	43393851	43395043	+	0.644356	0.635117
ANn_00042775	chr1	43436524	43439619	+	30.3071	18.9961
ANn_00042777	chr1	43446139	43448515	+	0	0
ANn_00042778	chr1	43451832	43460218	-	0.183785	0
ANn_00042779	chr1	43467466	43531158	+	7.08173	5.0418
ANn_00042780	chr1	43537217	43541618	+	0	0
ANn_00042782	chr1	43559020	43562628	-	0.282301	0
ANn_00042784	chr1	43563628	43565251	+	1.79436	0.750303
ANn_00042786	chr1	43572928	43612448	-	0.958429	0.312773
ANn_00042787	chr1	43622549	43657939	-	2.18812	0.9127
ANn_00042788	chr1	43673052	43674467	+	2.62066	0.783271
ANn_00042790	chr1	43681577	43708992	-	0	0
ANn_00042791	chr1	43781154	43783182	-	0.048718	0.048756
ANn_00042793	chr1	43807910	43813051	+	158.851	273.415
ANn_00042794	chr1	43808078	43810705	-	20.5367	45.609
ANn_00042795	chr1	43815924	43816751	+	0	0
ANn_00042796	chr1	43824318	43825779	+	0.038101	1.18812
ANn_00042798	chr1	43851499	43851898	-	2.36282	1.02456
ANn_00042799	chr1	43852979	43856898	+	0	0
ANn_00042800	chr1	43856314	43860085	-	33.034	54.2697
ANn_00042801	chr1	43868929	43870345	+	67.7845	65.361
ANn_00042802	chr1	43889331	43895313	+	1.4514	0.452791
ANn_00042803	chr1	43897373	43897684	-	0	0
ANn_00042804	chr1	43908873	43915334	+	1.62229	1.02952
ANn_00042805	chr1	43926373	43930373	-	5.50716	3.28324
ANn_00042806	chr1	43952050	43952951	-	0	0
ANn_00042807	chr1	43955462	43959393	-	0	0
ANn_00042808	chr1	44022157	44043667	+	0.304306	1.25325
ANn_00042809	chr1	44045078	44046602	-	0	0
ANn_00042810	chr1	44068722	44098484	+	42.2658	41.4994
ANn_00042813	chr1	44114714	44116059	+	58.5597	63.2412
ANn_00042815	chr1	44140345	44141302	-	3.56948	3.14319
ANn_00042816	chr1	44148949	44161972	+	0	0
ANn_00042817	chr1	44167343	44179718	-	9.74075	9.68088
ANn_00042818	chr1	44182504	44184048	+	1.14342	5.36841
ANn_00042819	chr1	44185681	44186003	+	0.475418	1.34036
ANn_00042820	chr1	44192792	44194682	+	0.269094	1.06536
ANn_00042826	chr1	44199253	44201956	+	0	0.016645
ANn_00042827	chr1	44229599	44229955	+	7.41707	17.1885
ANn_00042837	chr1	44234486	44238289	-	0	0
ANn_00042838	chr1	44246682	44263774	-	0	0.136224
ANn_00042839	chr1	44276510	44280400	+	0.102731	0.094309
ANn_00042840	chr1	44283769	44479955	-	0.025393	0.07201
ANn_00042841	chr1	44512589	44513837	+	0	0
ANn_00042844	chr1	44515327	44515521	-	0	0
ANn_00042845	chr1	44515494	44516521	+	6.55504	7.97948
ANn_00042846	chr1	44527908	44550291	-	11.6748	6.20117
ANn_00042847	chr1	44572233	44573195	+	4.57446	0.373553
ANn_00042848	chr1	44598175	44599323	-	2.28667	3.3589
ANn_00042849	chr1	44614681	44616551	+	0.051723	0
ANn_00042850	chr1	44618883	44619632	-	15.3297	17.1299
ANn_00042851	chr1	44641108	44642082	-	0	0
ANn_00042856	chr1	44642109	44642855	+	0	0
ANn_00042858	chr1	44652709	44656629	-	0	0.020435
ANn_00042861	chr1	44671393	44672571	-	0	0
ANn_00042863	chr1	44692959	44698539	-	0	0
ANn_00042866	chr1	44712261	44713685	-	0	0
ANn_00042867	chr1	44754262	44757264	-	0	0
ANn_00042869	chr1	44791740	44795294	+	0	0
ANn_00042871	chr1	44806210	44850816	-	0	0
ANn_00042872	chr1	44872456	44874906	+	0	0
ANn_00042873	chr1	44875722	44878438	-	0	0
ANn_00042875	chr1	44903909	44912963	+	0	0
ANn_00042877	chr1	44932711	44937656	-	0	0
ANn_00042879	chr1	44944797	44953343	-	0	0
ANn_00042881	chr1	44966980	44967872	-	0.895117	0.7692
ANn_00042882	chr1	45016725	45022848	+	0	0
ANn_00042883	chr1	45025885	45026426	-	4.58367	0.981899
ANn_00042884	chr1	45028987	45036529	-	7.31232	13.9887
ANn_00042885	chr1	45070556	45071371	-	0	0.036696
ANn_00042886	chr1	45080043	45084153	-	0.028263	0.276158
ANn_00042887	chr1	45086704	45104500	-	0	0
ANn_00042892	chr1	45106798	45108533	+	0	0
ANn_00042896	chr1	45124503	45125077	-	5.57457	11.8186
ANn_00042898	chr1	45171952	45172612	-	33.7402	34.6426
ANn_00042899	chr1	45228365	45232221	+	0	0
ANn_00042901	chr1	45264091	45264655	+	0	0
ANn_00042902	chr1	45291499	45292606	-	23.6249	48.193
ANn_00042903	chr1	45303629	45306303	+	0	0
ANn_00042904	chr1	45310751	45313663	+	0	0.1216
ANn_00042905	chr1	45315097	45316279	+	3.38828	3.14352
ANn_00042906	chr1	45320215	45330032	-	0.064429	0.390787
ANn_00042907	chr1	45333051	45334199	+	0	0
ANn_00042909	chr1	45337130	45338164	+	0	0
ANn_00042911	chr1	45352395	45355006	+	0	0
ANn_00042913	chr1	45358734	45359489	+	0.033693	0
ANn_00042914	chr1	45368057	45369016	+	0.020385	0
ANn_00042916	chr1	45369280	45371835	-	0	0
ANn_00042917	chr1	45372130	45375260	+	0	0
ANn_00042919	chr1	45375333	45376913	-	0	0
ANn_00042921	chr1	45387206	45394909	+	0	0
ANn_00042922	chr1	45403585	45408725	+	0	0
ANn_00042924	chr1	45441775	45443319	+	0	0
ANn_00042926	chr1	45457420	45458912	+	4.62888	4.85913
ANn_00042927	chr1	45480007	45480835	+	0.745996	0.828687
ANn_00042929	chr1	45487321	45490159	+	0	0
ANn_00042930	chr1	45521569	45523712	-	0	0
ANn_00042932	chr1	45577722	45579198	+	0	0
ANn_00042934	chr1	45592456	45592821	-	0	0
ANn_00042936	chr1	45597536	45599142	-	0	0
ANn_00042938	chr1	45600146	45605444	-	0	0
ANn_00042940	chr1	45621488	45622137	+	0	0
ANn_00042941	chr1	45623331	45624492	-	0	0
ANn_00042942	chr1	45626735	45638894	+	0	0
ANn_00042943	chr1	45658235	45663444	-	0	0
ANn_00042945	chr1	45672760	45673803	+	0	0
ANn_00042946	chr1	45685842	45689631	+	0	0
ANn_00042947	chr1	45690477	45692308	-	0	0
ANn_00042949	chr1	45714404	45715860	+	64.8051	103.51
ANn_00042950	chr1	45734566	45737832	+	8.85003	4.85763
ANn_00042951	chr1	45745324	45747714	+	0.404426	0.059497
ANn_00042952	chr1	45758285	45771563	+	0.681982	0.399341
ANn_00042953	chr1	45779834	45782263	+	0.119282	0.10392
ANn_00042954	chr1	45794695	45797072	+	0.224435	0.054459
ANn_00042956	chr1	45816370	45819964	+	16.8958	16.6145
ANn_00042957	chr1	45821984	45822178	-	0.01825	0
ANn_00042958	chr1	45840057	45841129	+	0.019902	0.022839
ANn_00042961	chr1	45851728	45852232	+	0.025284	0.06267
ANn_00042962	chr1	45854812	45857229	+	24.7782	19.7107
ANn_00042964	chr1	45862287	45866945	-	29.6918	71.7213
ANn_00042965	chr1	45877230	45878128	+	20.1935	31.5032
ANn_00042979	chr1	45883250	45883559	+	18.1537	10.9913
ANn_00042982	chr1	45886447	45888306	-	0	0
ANn_00042986	chr1	45888629	45889291	-	0	0
ANn_00042989	chr1	45891972	45893643	+	0.086808	0.202605
ANn_00042990	chr1	45899166	45903247	-	0.156826	0
ANn_00042993	chr1	45908981	45911440	+	7.94942	11.9362
ANn_00042995	chr1	45917245	45917564	-	0	0
ANn_00042996	chr1	45921013	45921423	-	0	0.047295
ANn_00042997	chr1	45923009	45927288	-	42.1178	37.2531
ANn_00042998	chr1	45927653	45928390	+	10.768	4.95489
ANn_00043000	chr1	45940750	45941880	-	0	0.083592
ANn_00043001	chr1	45960198	45965688	+	18.1185	42.9469
ANn_00043002	chr1	45966586	45967923	-	0.159832	0.03762
ANn_00043004	chr1	45985089	45985528	-	0.652572	0.207845
ANn_00043005	chr1	45987735	45990525	-	0	0.032821
ANn_00043006	chr1	45991953	46000890	-	0	0
ANn_00043007	chr1	46002908	46003926	+	0	0
ANn_00043008	chr1	46010441	46011089	+	0	0
ANn_00043009	chr1	46021828	46023295	-	0	0
ANn_00043011	chr1	46046022	46046550	-	0	0
ANn_00043012	chr1	46047630	46048243	-	0	0.008538
ANn_00043013	chr1	46059695	46060445	-	1.1804	4.23851
ANn_00043014	chr1	46065351	46066330	-	1.18185	1.54734
ANn_00043015	chr1	46074367	46075924	-	0	0
ANn_00043016	chr1	46090469	46101640	-	0	0
ANn_00043018	chr1	46107043	46107971	-	0.165288	0
ANn_00043019	chr1	46133387	46150237	+	3.11787	3.98137
ANn_00043020	chr1	46163384	46174355	+	0	3.7872
ANn_00043021	chr1	46188309	46189409	+	0	3.59325
ANn_00043022	chr1	46190915	46193329	-	0	0
ANn_00043024	chr1	46194578	46196234	-	0	0
ANn_00043025	chr1	46207795	46208430	+	98.2099	99.2669
ANn_00043026	chr1	46240096	46248252	+	9.69027	10.4968
ANn_00043027	chr1	46252436	46259852	-	0	0
ANn_00043028	chr1	46267848	46270092	-	0	0
ANn_00043029	chr1	46273022	46274364	-	0	0
[truncated: 33,095 more rows]

## Sheet: Sheet3
Table S3. Genomic Loci and gene expression in the Russian lotus genome.
Gene ID	Chr	Start	End	Strand	FPKM_sample1	FPKM_sample2
RNn_00000003	chr1	206275	207388	+	14.4441	17.7182
RNn_00000004	chr1	215390	217584	+	0	0
RNn_00000005	chr1	234138	234834	-	0	0
RNn_00000006	chr1	256123	256770	+	3.88387	1.7308
RNn_00000007	chr1	270234	296079	+	1.97116	2.90517
RNn_00000008	chr1	300111	301099	-	43.1376	65.6364
RNn_00000009	chr1	310553	311932	+	0.314496	0.40167
RNn_00000010	chr1	313580	315776	-	0	0.056429
RNn_00000012	chr1	330485	333880	-	9.61978	8.45758
RNn_00000013	chr1	354038	355679	+	0	0
RNn_00000015	chr1	364338	365606	+	0	0
RNn_00000016	chr1	369791	370144	-	0	0.143003
RNn_00000017	chr1	376704	379646	-	20.7305	25.2163
RNn_00000021	chr1	414490	416392	-	0	0
RNn_00000022	chr1	473967	481123	+	22.1983	20.9214
RNn_00000023	chr1	483057	487542	-	3.10801	3.39927
RNn_00000025	chr1	543680	543921	+	0	0
RNn_00000026	chr1	544027	638568	-	10.1323	8.01878
RNn_00000029	chr1	658633	667660	-	10.8352	8.59715
RNn_00000030	chr1	674572	674785	-	0	0
RNn_00000032	chr1	691978	693181	-	0	0
RNn_00000033	chr1	738376	739576	+	0	0.103226
RNn_00000034	chr1	781727	808173	+	59.0519	63.1904
RNn_00000035	chr1	783509	795280	+	0.038461	0.032044
RNn_00000036	chr1	811450	811824	-	0.286564	0.32509
RNn_00000037	chr1	835547	845435	-	0	0
RNn_00000038	chr1	860730	861095	+	0	0
RNn_00000039	chr1	894892	895530	-	15.1351	13.6162
RNn_00000042	chr1	1060950	1062052	-	0	0
RNn_00000044	chr1	1177522	1178622	-	0.088006	0
RNn_00000045	chr1	1202714	1203029	+	2.1974	1.49084
RNn_00000047	chr1	1260559	1261815	-	0	0
RNn_00000048	chr1	1272985	1277240	-	0	0
RNn_00000049	chr1	1277675	1279081	-	0	0
RNn_00000050	chr1	1302262	1302603	-	3.3778	1.98771
RNn_00000051	chr1	1311642	1312247	-	1.70088	1.27691
RNn_00000052	chr1	1312866	1313066	+	1.07461	1.46796
RNn_00000053	chr1	1318794	1319903	+	5.18557	5.97574
RNn_00000056	chr1	1392518	1395701	-	0	0.067215
RNn_00000058	chr1	1433261	1496186	-	5.24285	4.7394
RNn_00000060	chr1	1535802	1539583	+	14.5269	8.8841
RNn_00000061	chr1	1558602	1564936	+	1.93084	1.46525
RNn_00000062	chr1	1570796	1571677	-	0	0
RNn_00000064	chr1	1584591	1588911	-	13.5422	10.9462
RNn_00000067	chr1	1684698	1685157	+	0	0
RNn_00000068	chr1	1753821	1756097	+	0	0
RNn_00000070	chr1	1780164	1782689	+	3.74492	2.17734
RNn_00000071	chr1	1825466	1827522	-	22.6407	28.3812
RNn_00000072	chr1	1842549	1842898	+	0	0
RNn_00000073	chr1	1858540	1860422	+	15.0628	13.0862
RNn_00000074	chr1	1899432	1901194	-	20.2786	18.4911
RNn_00000075	chr1	1918570	1941846	-	10.6041	10.791
RNn_00000076	chr1	1948272	1949267	+	0	0
RNn_00000077	chr1	1993086	1994793	+	3.68041	3.35343
RNn_00000078	chr1	2011688	2012915	-	0.36651	0.219595
RNn_00000080	chr1	2076294	2076749	-	0	0
RNn_00000081	chr1	2089078	2091245	+	0	0
RNn_00000082	chr1	2105520	2106359	-	0	0
RNn_00000083	chr1	2128213	2129538	-	0	0.058534
RNn_00000084	chr1	2136037	2143252	-	33.6127	37.4258
RNn_00000085	chr1	2155241	2155933	+	0	0
RNn_00000086	chr1	2162766	2164211	+	0	0
RNn_00000087	chr1	2179412	2179836	+	0	0
RNn_00000088	chr1	2191473	2191895	+	0	0
RNn_00000089	chr1	2221073	2221882	-	0	0
RNn_00000090	chr1	2221969	2223140	+	0	0
RNn_00000092	chr1	2250084	2250509	+	0	0
RNn_00000093	chr1	2307474	2308656	-	0	0
RNn_00000094	chr1	2327279	2327704	-	0	0
RNn_00000096	chr1	2408511	2415376	-	0	0
RNn_00000097	chr1	2421986	2422064	+	0	0
RNn_00000098	chr1	2425660	2426470	-	0	0
RNn_00000099	chr1	2426557	2427699	+	0	0
RNn_00000100	chr1	2453038	2453936	+	0	0.094493
RNn_00000101	chr1	2455058	2455741	+	2.91838	4.00235
RNn_00000102	chr1	2456811	2457683	+	0	0
RNn_00000104	chr1	2477766	2483299	-	0.386199	0.312364
RNn_00000107	chr1	2598351	2598698	-	0	0
RNn_00000108	chr1	2613082	2614177	+	0	0
RNn_00000109	chr1	2640211	2643098	+	0	0.189498
RNn_00000110	chr1	2649399	2652663	-	0	0
RNn_00000111	chr1	2661230	2776872	+	17.7079	17.4352
RNn_00000112	chr1	2704414	2705799	-	0	0
RNn_00000113	chr1	2779978	2782294	-	10.678	11.3331
RNn_00000114	chr1	2807930	2811590	-	5.67936	6.98901
RNn_00000115	chr1	2839756	2841570	-	0	0.068306
RNn_00000117	chr1	2928734	2939075	+	12.1116	10.3316
RNn_00000118	chr1	2956457	2958480	-	0.223371	0.176621
RNn_00000119	chr1	2960233	2961856	+	0	0
RNn_00000120	chr1	2973217	2975234	+	0.961798	1.0935
RNn_00000121	chr1	3008621	3027446	-	6.00009	4.92784
RNn_00000122	chr1	3028924	3029271	-	3.66954	4.71199
RNn_00000124	chr1	3059801	3069334	+	32.6361	36.7696
RNn_00000125	chr1	3095970	3097559	+	1.82571	2.57512
RNn_00000126	chr1	3102101	3102592	-	0.763733	1.05622
RNn_00000127	chr1	3148011	3153743	-	115.498	131.557
RNn_00000129	chr1	3237809	3238238	+	7.48198	7.18764
RNn_00000130	chr1	3237831	3238115	-	17.7236	21.2108
RNn_00000131	chr1	3245772	3247042	-	4.95695	4.19736
RNn_00000133	chr1	3297805	3301772	+	1.65213	1.30938
RNn_00000134	chr1	3324735	3326830	+	0.596267	0.761533
RNn_00000135	chr1	3353987	3355570	+	1.50512	1.39314
RNn_00000136	chr1	3356459	3366319	-	8.58879	7.89646
RNn_00000137	chr1	3381430	3382619	-	0	0.05209
RNn_00000138	chr1	3391938	3425187	+	2.28115	2.6413
RNn_00000139	chr1	3435352	3435551	-	1.14536	0.174598
RNn_00000140	chr1	3452088	3463460	-	37.7151	37.7969
RNn_00000141	chr1	3474267	3475429	-	0	0.067264
RNn_00000142	chr1	3495553	3524298	+	9.44633	8.59023
RNn_00000143	chr1	3526478	3527556	+	0.30459	0.41976
RNn_00000144	chr1	3541624	3560575	-	154.221	149.016
RNn_00000145	chr1	3633241	3633540	-	0	0
RNn_00000148	chr1	3660343	3661355	+	0	0
RNn_00000149	chr1	3696790	3697110	-	0	0
RNn_00000151	chr1	3734444	3735061	+	0	0
RNn_00000152	chr1	3778925	3783251	-	0.224038	0.161726
RNn_00000153	chr1	3784333	3862496	+	20.3133	23.8589
RNn_00000154	chr1	3870328	3870661	+	0	0
RNn_00000155	chr1	3892873	3894665	+	10.8957	9.14531
RNn_00000156	chr1	3920623	3923651	+	0	0
RNn_00000157	chr1	3920740	3921379	-	0	0
RNn_00000158	chr1	3935600	3938853	+	0	0.042428
RNn_00000159	chr1	3947389	3947676	-	0	0
RNn_00000160	chr1	3956010	3959873	+	10.3304	10.005
RNn_00000161	chr1	3983147	4005529	-	10.5177	9.36341
RNn_00000162	chr1	4026766	4033586	+	32.149	32.7897
RNn_00000163	chr1	4047326	4051618	+	32.0101	35.7056
RNn_00000165	chr1	4084363	4087860	-	10.3151	9.84081
RNn_00000166	chr1	4122005	4122656	-	0	0
RNn_00000167	chr1	4128166	4128939	+	0.616676	0.437009
RNn_00000168	chr1	4140707	4152492	+	0	0
RNn_00000169	chr1	4156781	4159556	+	0	0
RNn_00000170	chr1	4158796	4160990	-	0	0
RNn_00000173	chr1	4196911	4198284	-	0	0
RNn_00000174	chr1	4206849	4210849	+	0.846984	0.734542
RNn_00000175	chr1	4223606	4224196	-	1.3313	0.695742
RNn_00000176	chr1	4226815	4230148	-	34.6641	29.9118
RNn_00000177	chr1	4245699	4247705	+	0.695259	0.709546
RNn_00000179	chr1	4261532	4265198	-	6.07835	8.02518
RNn_00000180	chr1	4287634	4288014	+	0	0
RNn_00000181	chr1	4290888	4323697	-	25.703	29.7073
RNn_00000183	chr1	4321223	4321767	+	0	0.103123
RNn_00000185	chr1	4336465	4374212	+	17.871	16.4008
RNn_00000186	chr1	4379726	4385687	-	16.8842	16.8565
RNn_00000187	chr1	4393429	4395531	-	5.29288	4.89815
RNn_00000188	chr1	4452255	4474972	+	74.6856	82.9699
RNn_00000189	chr1	4463377	4464739	-	0	0.136436
RNn_00000190	chr1	4478321	4508870	-	70.3917	59.5128
RNn_00000191	chr1	4511054	4512427	-	0.847281	1.01508
RNn_00000192	chr1	4513339	4516417	-	1.42119	1.2169
RNn_00000193	chr1	4522692	4528844	+	2.33169	1.97779
RNn_00000194	chr1	4565894	4567399	+	0.846152	0.823245
RNn_00000195	chr1	4571969	4584057	+	5.20136	6.34028
RNn_00000196	chr1	4590927	4594321	+	24.4235	33.4583
RNn_00000197	chr1	4595396	4603780	-	1.8421	1.75918
RNn_00000198	chr1	4596168	4597637	+	0	0
RNn_00000199	chr1	4630437	4737676	-	19.4112	16.5917
RNn_00000200	chr1	4749055	4749642	-	1.91712	3.46167
RNn_00000201	chr1	4788532	4788835	-	0	0
RNn_00000202	chr1	4789835	4790518	-	0	0
RNn_00000203	chr1	4797753	4798186	-	0	0
RNn_00000205	chr1	4808003	4811443	-	0.38161	0.14675
RNn_00000206	chr1	4808669	4808892	+	0	0
RNn_00000207	chr1	4809959	4810453	-	0	0.125227
RNn_00000208	chr1	4826617	4829229	-	12.9649	10.1755
RNn_00000209	chr1	4866803	4867375	+	8.6391	5.91928
RNn_00000210	chr1	4924008	4925405	-	0.042847	0.098864
RNn_00000211	chr1	4939149	4940076	+	0	0
RNn_00000212	chr1	4951235	4952519	-	4.21537	5.22447
RNn_00000215	chr1	5037835	5038255	-	0	0
RNn_00000216	chr1	5060803	5064366	+	41.1012	42.05
RNn_00000217	chr1	5074622	5076217	-	7.74465	6.48737
RNn_00000219	chr1	5116326	5118656	-	0	0
RNn_00000220	chr1	5146322	5147980	-	3.7723	4.94988
RNn_00000221	chr1	5146856	5147101	-	1.21076	0.297338
RNn_00000222	chr1	5153985	5157286	+	47.251	51.876
RNn_00000223	chr1	5181103	5188488	+	30.381	27.8878
RNn_00000224	chr1	5211885	5213292	+	17.4896	16.9077
RNn_00000225	chr1	5214764	5215105	-	0	0
RNn_00000226	chr1	5224767	5225099	+	0	0
RNn_00000227	chr1	5229594	5243990	-	69.8898	61.7649
RNn_00000228	chr1	5262332	5262664	+	0	0
RNn_00000230	chr1	5267617	5268507	-	0	0.034785
RNn_00000231	chr1	5284582	5288048	+	9.38127	10.2068
RNn_00000232	chr1	5291484	5309750	-	8.56772	7.36395
RNn_00000233	chr1	5303395	5304744	+	2.487	2.73035
RNn_00000234	chr1	5318748	5322394	-	52.8313	47.2066
RNn_00000235	chr1	5329132	5340801	-	2.758	1.89239
RNn_00000236	chr1	5353291	5354445	+	0	0
RNn_00000237	chr1	5359241	5431089	-	8.66882	9.29172
RNn_00000238	chr1	5392994	5394873	-	0.153968	0.146087
RNn_00000239	chr1	5431534	5448431	+	8.01491	9.32272
RNn_00000240	chr1	5455889	5462451	+	7.55849	7.72544
RNn_00000241	chr1	5477908	5478579	-	0	0.238872
RNn_00000242	chr1	5496519	5499121	-	1.98781	2.0437
RNn_00000243	chr1	5506134	5506397	+	0	0
RNn_00000245	chr1	5528713	5533347	-	2.11302	2.07213
RNn_00000246	chr1	5536521	5537804	-	0.125539	0.024138
RNn_00000247	chr1	5546718	5546843	+	0	0
RNn_00000248	chr1	5546883	5547116	-	0	0
RNn_00000249	chr1	5551217	5551534	-	0	0
RNn_00000250	chr1	5573411	5575967	-	5.53109	4.05993
RNn_00000252	chr1	5582266	5586120	+	0.025104	0
RNn_00000253	chr1	5586776	5587223	+	0	0
RNn_00000254	chr1	5590952	5592660	+	42.6138	39.3048
RNn_00000255	chr1	5615892	5622416	+	0.329431	0.087455
RNn_00000257	chr1	5622106	5622464	-	0	0
RNn_00000258	chr1	5623283	5624153	-	1.83976	1.84325
RNn_00000261	chr1	5700814	5714621	-	2.87402	2.77041
RNn_00000262	chr1	5708904	5782082	+	0	0
RNn_00000263	chr1	5738577	5740885	-	0	0.067969
RNn_00000264	chr1	5772970	5786808	-	1.82305	1.75547
RNn_00000265	chr1	5810851	5813163	-	0	0.067969
RNn_00000266	chr1	5851269	5867277	+	30.1359	29.8146
RNn_00000267	chr1	5870928	5871320	-	0	0
RNn_00000268	chr1	5877997	5880898	+	4.68477	3.84717
RNn_00000269	chr1	5890194	5890586	+	30.3287	24.6595
RNn_00000270	chr1	5890720	5919731	+	17.8458	15.7142
RNn_00000271	chr1	5924144	5926564	+	0.031202	0.071995
RNn_00000272	chr1	5928655	5930432	-	2.41647	1.92214
RNn_00000273	chr1	5951452	5952243	-	0	0
RNn_00000274	chr1	5969893	5972099	-	3.79713	4.59842
RNn_00000276	chr1	5972978	5974769	-	0	0
RNn_00000277	chr1	6023768	6029629	-	6.57285	6.53424
RNn_00000278	chr1	6041668	6062762	+	7.43257	8.05631
RNn_00000279	chr1	6070315	6071106	-	1.03887	1.09681
RNn_00000280	chr1	6093076	6094670	+	1.15577	0.891035
RNn_00000282	chr1	6125560	6125865	-	0	0
RNn_00000283	chr1	6132620	6133864	+	0	0.048959
RNn_00000284	chr1	6145796	6147563	-	0	0.035061
RNn_00000285	chr1	6148084	6151350	+	6.15362	7.09089
RNn_00000286	chr1	6160407	6164718	+	0	0
RNn_00000287	chr1	6182724	6185167	+	2.41773	3.06539
RNn_00000288	chr1	6187220	6187552	-	0	0
RNn_00000289	chr1	6191508	6197858	-	2.02387	1.64994
RNn_00000290	chr1	6200224	6214589	-	7.70424	8.93768
RNn_00000292	chr1	6231093	6237281	-	75.2604	73.7129
RNn_00000294	chr1	6245232	6248348	+	2.75292	3.81386
RNn_00000295	chr1	6246268	6247079	-	11.9669	13.6598
RNn_00000296	chr1	6254723	6255184	+	0	0
RNn_00000297	chr1	6275923	6276294	+	15.9733	19.0195
RNn_00000299	chr1	6301673	6302719	-	0.355169	0.291864
RNn_00000300	chr1	6342528	6345139	-	8.54439	9.78906
RNn_00000303	chr1	6359112	6359312	-	0	0
RNn_00000305	chr1	6375993	6382503	+	5.32827	5.49194
RNn_00000306	chr1	6390859	6394384	+	0.047436	0.028112
RNn_00000307	chr1	6394743	6401013	-	11.8654	11.5199
RNn_00000308	chr1	6418590	6419063	-	0.599781	0.572192
RNn_00000309	chr1	6421132	6422178	+	74.565	75.2824
RNn_00000311	chr1	6437519	6440414	-	0.63414	0.820087
RNn_00000312	chr1	6448885	6450454	-	11.5639	11.6978
RNn_00000313	chr1	6451180	6454015	+	116.131	110.842
RNn_00000314	chr1	6473765	6475222	-	3.0144	3.36665
RNn_00000315	chr1	6490406	6558912	-	6.06765	5.52849
RNn_00000318	chr1	6620216	6625103	+	4.853	3.80111
RNn_00000319	chr1	6644441	6646143	+	126.406	153.643
RNn_00000320	chr1	6648444	6649286	-	106.566	97.1502
RNn_00000322	chr1	6653804	6737084	-	44.5592	42.8519
RNn_00000324	chr1	6780959	6782220	+	0	0
RNn_00000325	chr1	6796043	6797239	-	0.179551	0.310714
RNn_00000326	chr1	6808365	6814054	-	10.7558	11.5342
RNn_00000327	chr1	6853408	6853800	+	0	0.266036
RNn_00000328	chr1	6868129	6868464	-	8.05107	7.79025
RNn_00000329	chr1	6872393	6874350	+	3.67096	3.95785
RNn_00000330	chr1	6878766	6880926	-	1.45652	0.920585
RNn_00000331	chr1	6883407	6884083	-	0.067726	0
RNn_00000332	chr1	6885365	6885576	-	0	0
RNn_00000335	chr1	6913356	6913610	-	0	0.129707
RNn_00000337	chr1	6921988	6922306	+	0.314411	0.921715
RNn_00000338	chr1	6933837	6934229	-	0.287566	0.278654
RNn_00000339	chr1	6963673	6965046	-	0	0
RNn_00000340	chr1	6976763	6978813	+	0.885351	1.36956
RNn_00000342	chr1	7066379	7067612	+	0	0
RNn_00000343	chr1	7067194	7067416	-	0	0
RNn_00000344	chr1	7083748	7087052	-	0.559634	0.327474
RNn_00000345	chr1	7084940	7085337	+	0	0
RNn_00000346	chr1	7085667	7086878	+	0	0
RNn_00000347	chr1	7089716	7090588	+	0	0
RNn_00000348	chr1	7120210	7122567	+	0	0
RNn_00000349	chr1	7140889	7141233	+	3.02397	1.54639
RNn_00000350	chr1	7171523	7187692	-	4.27005	3.56523
RNn_00000351	chr1	7185346	7186623	+	0.234318	0.110426
RNn_00000353	chr1	7225129	7225558	+	10.6026	6.42579
RNn_00000354	chr1	7233618	7236329	+	4.65493	3.79414
RNn_00000356	chr1	7307309	7312273	+	0	0
RNn_00000357	chr1	7307681	7311675	-	0	0
RNn_00000359	chr1	7320500	7322068	+	0.049199	0.197406
RNn_00000360	chr1	7327362	7336483	+	5.79038	5.21204
RNn_00000362	chr1	7347314	7348415	-	0	0
RNn_00000363	chr1	7348680	7349146	-	0	0
RNn_00000364	chr1	7354509	7355775	+	4.76338	6.36786
RNn_00000365	chr1	7370540	7370998	+	0	0
RNn_00000366	chr1	7375422	7389296	+	3.60276	4.1086
RNn_00000367	chr1	7397885	7398617	+	0.62307	0.169134
RNn_00000368	chr1	7399191	7399748	+	1.67643	2.64983
RNn_00000371	chr1	7443546	7447565	-	42.0978	40.3619
RNn_00000372	chr1	7483647	7485352	+	59.4186	66.5077
RNn_00000374	chr1	7528842	7529834	+	1.11375	1.47114
RNn_00000375	chr1	7532517	7537267	-	0	0
RNn_00000378	chr1	7574623	7577463	+	0	0.021819
RNn_00000379	chr1	7582538	7585197	-	0.787252	0.700532
RNn_00000382	chr1	7644690	7645329	+	0	0
RNn_00000383	chr1	7647503	7649893	-	0	0
RNn_00000384	chr1	7660834	7663920	-	0.026108	0
RNn_00000385	chr1	7663526	7663841	+	0	0
RNn_00000386	chr1	7708655	7709294	+	0	0
RNn_00000387	chr1	7711470	7713857	-	0	0
RNn_00000388	chr1	7724809	7727900	-	0.026066	0
RNn_00000389	chr1	7727506	7727821	+	0	0
RNn_00000390	chr1	7741773	7743937	+	0	0
RNn_00000391	chr1	7744482	7745072	-	0.558823	0.314657
RNn_00000392	chr1	7754419	7758507	+	0	0
RNn_00000393	chr1	7782945	7786069	+	0.044412	0
RNn_00000394	chr1	7788073	7818302	-	40.3979	34.383
RNn_00000395	chr1	7855711	7857269	-	1.23808	1.54477
RNn_00000396	chr1	7864190	7864621	+	0	0
RNn_00000397	chr1	7865091	7865260	+	0	0
RNn_00000398	chr1	7868699	7907468	-	20.1661	19.4325
RNn_00000400	chr1	7936098	7940605	-	0	0
RNn_00000401	chr1	7944050	7945681	+	0	0
RNn_00000402	chr1	7955140	7956175	+	0.572969	0.644007
RNn_00000403	chr1	7972472	7973034	-	0	0
RNn_00000404	chr1	7976646	7976965	-	41.7862	38.8519
RNn_00000405	chr1	7981209	7981481	+	0.484167	1.1353
RNn_00000406	chr1	7994579	7994875	+	0	0
RNn_00000407	chr1	8019584	8022976	-	36.3765	41.5334
RNn_00000408	chr1	8024852	8026450	+	0.201616	0
RNn_00000409	chr1	8025559	8025970	-	0	0
RNn_00000410	chr1	8031815	8034200	+	6.15531	6.07395
RNn_00000411	chr1	8046195	8046935	-	8.28678	5.89655
RNn_00000412	chr1	8057954	8058860	-	0	0
RNn_00000413	chr1	8079421	8084371	+	10.1646	10.5035
RNn_00000414	chr1	8085944	8086518	-	0.974005	0.923882
RNn_00000415	chr1	8090696	8090980	+	3.82558	6.05115
RNn_00000416	chr1	8091367	8096010	+	2.24352	2.86641
RNn_00000417	chr1	8101123	8101782	-	596.369	611.442
RNn_00000419	chr1	8117921	8118511	-	7.01529	4.46848
RNn_00000420	chr1	8122610	8124754	+	0.174092	0.043974
RNn_00000423	chr1	8173456	8175424	-	2.30385	1.76916
RNn_00000425	chr1	8265991	8267619	-	0	0
RNn_00000426	chr1	8312577	8313980	+	2289.1	2464.68
RNn_00000429	chr1	8396965	8455299	+	4.28973	4.01007
RNn_00000432	chr1	8482381	8483100	-	0	0
RNn_00000434	chr1	8516247	8516772	-	0	0.062852
RNn_00000435	chr1	8522442	8553390	-	11.84	10.0342
RNn_00000437	chr1	8617832	8619107	-	0.231457	0.235449
RNn_00000439	chr1	8682992	8683423	-	0.160446	0.143489
RNn_00000440	chr1	8686024	8687452	+	0.877415	0.541071
RNn_00000441	chr1	8695339	8696021	+	0	0
RNn_00000442	chr1	8712011	8713495	-	0	0
RNn_00000444	chr1	8789874	8816316	-	0.946305	0.803832
RNn_00000445	chr1	8852728	8853294	+	0	0
RNn_00000446	chr1	8854912	8855295	-	4.52653	4.96599
RNn_00000447	chr1	8864670	8885680	-	23.8018	26.4807
RNn_00000448	chr1	8916205	8917085	+	0	0.010319
RNn_00000449	chr1	8979817	8991412	+	0.023412	0.038433
RNn_00000450	chr1	9024629	9058419	+	32.1412	31.3379
RNn_00000451	chr1	9080063	9084903	-	32.3999	28.3863
RNn_00000452	chr1	9118288	9119260	+	4.25225	4.70957
RNn_00000453	chr1	9119691	9121970	+	4.15691	6.23821
RNn_00000454	chr1	9134239	9134870	+	0.296709	0.432866
RNn_00000455	chr1	9142245	9143110	+	0	0
RNn_00000456	chr1	9144206	9145448	-	34.4688	31.3235
RNn_00000457	chr1	9165901	9166530	+	3.71992	3.6589
RNn_00000458	chr1	9173076	9192731	-	11.1806	10.8655
RNn_00000459	chr1	9193782	9196088	+	0	0
RNn_00000460	chr1	9205345	9206608	-	8.7515	8.82193
RNn_00000464	chr1	9257959	9259099	-	0.278307	0.363631
RNn_00000465	chr1	9260012	9260453	-	1.65408	1.11184
RNn_00000466	chr1	9276985	9277350	+	0	0
RNn_00000468	chr1	9305562	9381742	-	39.4797	43.6391
RNn_00000469	chr1	9382450	9382740	+	6.30366	6.42454
RNn_00000470	chr1	9397715	9398669	-	0	0
RNn_00000471	chr1	9399984	9457819	-	77.7902	78.4794
RNn_00000472	chr1	9466525	9581853	+	28.1647	31.9159
RNn_00000474	chr1	9533879	9534956	+	0	0.057502
RNn_00000475	chr1	9599812	9600237	-	0	0
RNn_00000477	chr1	9663640	9665759	+	0.958422	0.607919
RNn_00000479	chr1	9723966	9726124	+	0.898771	0.595117
RNn_00000480	chr1	9782575	9783091	-	0	0
RNn_00000482	chr1	9916055	9917923	-	0.028748	0.066332
RNn_00000483	chr1	9999263	10000311	-	0	0.550062
RNn_00000484	chr1	10015680	10018443	-	11.6915	12.0457
RNn_00000485	chr1	10044854	10122941	+	2.30343	2.15969
RNn_00000488	chr1	10180883	10181218	-	0	0
RNn_00000489	chr1	10233431	10258043	-	10.4286	10.0101
RNn_00000490	chr1	10254992	10255763	-	0	0
RNn_00000491	chr1	10303497	10303866	-	0	0
RNn_00000492	chr1	10329897	10337064	+	74.5097	71.3144
RNn_00000493	chr1	10338538	10362783	-	13.1026	10.134
RNn_00000495	chr1	10423715	10433003	-	5.60642	5.16018
RNn_00000496	chr1	10433883	10434278	-	1.73539	2.53376
RNn_00000497	chr1	10437269	10437948	+	1.37889	1.19144
RNn_00000498	chr1	10438685	10439432	+	1.07749	0.290048
RNn_00000499	chr1	10449665	10454630	+	0.087825	0
RNn_00000500	chr1	10455486	10455902	-	0	0
RNn_00000501	chr1	10472758	10478243	-	4.18776	4.40504
RNn_00000502	chr1	10493914	10494552	+	0	0
RNn_00000504	chr1	10507144	10507305	-	1.17411	0.099486
RNn_00000505	chr1	10509382	10510128	+	0.761964	0.76371
RNn_00000506	chr1	10518980	10520383	+	0	0.088301
RNn_00000508	chr1	10531997	10532246	+	0	0
RNn_00000509	chr1	10556452	10557174	-	0.025763	0.116887
RNn_00000510	chr1	10624491	10625654	+	0	0
RNn_00000512	chr1	10653086	10653466	-	1.52119	1.07109
RNn_00000513	chr1	10673971	10674161	+	0	0
RNn_00000514	chr1	10678506	10678823	+	0	0
RNn_00000515	chr1	10680959	10681555	+	0	0
RNn_00000516	chr1	10706717	10757077	+	11.9993	11.5562
RNn_00000517	chr1	10759296	10776313	+	48.3049	47.9213
RNn_00000518	chr1	10776264	10776511	-	13.1308	14.4654
RNn_00000519	chr1	10777313	10829303	-	12.4235	11.4149
RNn_00000520	chr1	10852764	10853143	-	0	0
RNn_00000522	chr1	10883521	10883923	-	0	0
RNn_00000523	chr1	10889735	10890110	-	0	0
RNn_00000524	chr1	10900317	10900786	-	0	0
RNn_00000525	chr1	10920840	10922978	-	0.297677	0.626549
RNn_00000526	chr1	10940539	10940972	+	1.87452	1.64235
RNn_00000527	chr1	10941112	10948234	+	11.6765	10.4377
RNn_00000528	chr1	10952610	10952828	+	0	0
RNn_00000530	chr1	10970854	10996687	+	5.997	5.33264
RNn_00000531	chr1	11017619	11020406	-	1.40387	1.48636
RNn_00000532	chr1	11035696	11037290	+	0	0
RNn_00000533	chr1	11035820	11038058	-	0	0
RNn_00000535	chr1	11040583	11043078	-	0	0
RNn_00000537	chr1	11043914	11044227	-	0	0
RNn_00000538	chr1	11044519	11044824	-	0	0
RNn_00000539	chr1	11045066	11045595	-	0	0.058479
RNn_00000540	chr1	11045958	11046497	-	0	0
RNn_00000543	chr1	11047933	11048213	+	0	0
RNn_00000545	chr1	11049929	11050210	-	0	0
RNn_00000546	chr1	11066556	11066827	-	1.14244	0.533274
RNn_00000547	chr1	11067259	11067493	+	0.617331	0.44754
RNn_00000548	chr1	11085248	11088136	-	10.4021	10.2934
RNn_00000549	chr1	11101828	11102778	+	30.7555	28.3567
RNn_00000550	chr1	11138135	11138908	-	0	0
RNn_00000551	chr1	11168317	11171995	-	3.76269	4.52089
RNn_00000552	chr1	11176425	11176805	+	0	0
RNn_00000553	chr1	11180261	11180546	+	0.881734	0.931979
RNn_00000554	chr1	11181271	11184139	+	15.8909	19.0555
RNn_00000556	chr1	11205405	11207848	+	0.087939	0.025363
RNn_00000557	chr1	11206844	11207768	-	0.116174	0
RNn_00000558	chr1	11217273	11217715	+	0	0
RNn_00000559	chr1	11225963	11228255	-	0.429602	0.324542
RNn_00000560	chr1	11236656	11237556	-	0	0
RNn_00000561	chr1	11237642	11238000	-	0	0
RNn_00000562	chr1	11261046	11261672	+	0.716409	0.639647
RNn_00000563	chr1	11266533	11267407	-	7.57823	9.7267
RNn_00000564	chr1	11290632	11292755	+	131.275	129.832
RNn_00000565	chr1	11314585	11318794	-	1.17988	1.37798
RNn_00000568	chr1	11376627	11378366	+	31.5369	30.3761
RNn_00000569	chr1	11404489	11406221	+	1248.12	1447.1
RNn_00000571	chr1	11433556	11433810	-	90.533	81.7084
RNn_00000572	chr1	11446501	11455290	-	28.5381	26.0876
RNn_00000573	chr1	11455318	11455974	-	5.03472	4.78911
RNn_00000574	chr1	11492937	11498034	+	1.31807	1.26445
RNn_00000575	chr1	11498647	11517820	-	38.4435	32.2978
RNn_00000576	chr1	11525940	11526748	-	0	0
RNn_00000577	chr1	11581542	11582512	+	21.3191	20.8655
RNn_00000578	chr1	11601125	11606917	+	40.2844	46.434
RNn_00000579	chr1	11614304	11615209	-	1.86179	1.52095
RNn_00000580	chr1	11626471	11633775	+	0.429551	0.283816
RNn_00000581	chr1	11648789	11653273	+	0	0
RNn_00000582	chr1	11667958	11670215	-	1.06533	1.07702
RNn_00000583	chr1	11690929	11698864	-	1.75362	1.74989
RNn_00000584	chr1	11712581	11724343	-	24.8855	25.8101
RNn_00000585	chr1	11721877	11723430	+	0.298504	0.1678
RNn_00000586	chr1	11742616	11751314	-	1.93286	1.91829
RNn_00000588	chr1	11756850	11757287	-	0	0
RNn_00000589	chr1	11757190	11757575	+	0	0
RNn_00000590	chr1	11762119	11763156	-	0.155291	0.119436
RNn_00000591	chr1	11773883	11784582	-	3.19987	2.94167
RNn_00000593	chr1	11813065	11814092	+	0.911365	0.817253
RNn_00000594	chr1	11819869	11850950	-	0	0.015287
RNn_00000596	chr1	11891464	11899890	+	1.04203	1.13717
RNn_00000597	chr1	11907358	11911356	+	8.62851	8.33561
RNn_00000598	chr1	11917213	11918656	-	0.933677	0.990319
RNn_00000599	chr1	11919169	11941067	+	12.4554	11.9068
RNn_00000601	chr1	11994776	11997637	-	0	0
RNn_00000602	chr1	11999278	12000493	+	0	0.069337
RNn_00000603	chr1	12000627	12002285	+	0.783536	0.48162
RNn_00000604	chr1	12010918	12012707	+	11.4522	10.6593
RNn_00000606	chr1	12018496	12018802	-	1.00344	0.942936
RNn_00000607	chr1	12020251	12022524	+	2.36464	3.46192
RNn_00000608	chr1	12048368	12049324	-	48.6434	38.7502
RNn_00000609	chr1	12079308	12086556	-	8.55319	8.75562
RNn_00000610	chr1	12109052	12122195	+	12.1092	12.6458
RNn_00000611	chr1	12141225	12279436	+	52.2747	47.8672
RNn_00000613	chr1	12280442	12284096	-	0.132341	0.267493
RNn_00000614	chr1	12313722	12314191	+	6.51627	7.03711
RNn_00000615	chr1	12334355	12341810	+	45.7956	40.6478
RNn_00000616	chr1	12347668	12351069	-	18.8351	22.0454
RNn_00000617	chr1	12372397	12383276	-	192.558	160.141
RNn_00000618	chr1	12422732	12424332	+	8.14013	6.83076
RNn_00000619	chr1	12447885	12463503	+	38.0598	40.712
RNn_00000620	chr1	12469403	12471676	-	5.39126	4.81089
RNn_00000621	chr1	12474082	12477939	+	37.0375	32.711
RNn_00000622	chr1	12481398	12482525	-	0.047475	0
RNn_00000624	chr1	12493443	12496625	-	64.2611	60.8777
RNn_00000625	chr1	12501948	12507293	-	0.05032	0.011595
RNn_00000626	chr1	12517784	12518058	+	0	0
RNn_00000627	chr1	12518505	12521267	+	8.58628	9.06159
RNn_00000628	chr1	12522115	12524744	-	0.153837	0.129553
RNn_00000629	chr1	12542973	12543407	+	0	0
RNn_00000630	chr1	12550402	12551735	-	0	0
RNn_00000631	chr1	12558551	12558979	+	0	0
RNn_00000633	chr1	12572522	12574834	-	1.04696	0.78913
RNn_00000634	chr1	12578372	12631446	-	11.3029	9.75284
RNn_00000636	chr1	12656219	12661600	+	42.5778	39.2758
RNn_00000637	chr1	12668946	12669548	-	1.415	0.920388
RNn_00000639	chr1	12690731	12691110	+	0	0
RNn_00000640	chr1	12697538	12698331	-	0	0
RNn_00000642	chr1	12713646	12714485	-	0	0
RNn_00000645	chr1	12777251	12777666	+	0	0
RNn_00000646	chr1	12799179	12800019	-	0	0
RNn_00000647	chr1	12806499	12807293	-	0	0
RNn_00000648	chr1	12846523	12847363	-	0	0
RNn_00000649	chr1	12853834	12854628	-	0	0
RNn_00000650	chr1	12930509	12930784	-	0	0
RNn_00000651	chr1	12975565	12976113	-	0	0
RNn_00000652	chr1	12987360	12987899	-	0	0
RNn_00000653	chr1	13002116	13010442	+	5.96715	6.49512
RNn_00000654	chr1	13012866	13013668	+	4.0312	3.54762
RNn_00000655	chr1	13014214	13016058	-	8.95713	8.47887
RNn_00000656	chr1	13027781	13076508	+	37.0207	38.926
RNn_00000657	chr1	13079269	13079592	+	7.62456	15.7175
RNn_00000658	chr1	13085439	13110275	-	48.7637	43.9669
RNn_00000659	chr1	13130389	13135010	+	0.034453	0.411488
RNn_00000660	chr1	13137265	13139349	-	4.17467	5.02728
RNn_00000661	chr1	13142952	13144893	-	0.973831	0.358013
RNn_00000662	chr1	13148450	13151020	-	1.0875	0.974456
RNn_00000663	chr1	13152263	13154935	-	0.03902	0.160976
RNn_00000665	chr1	13180441	13180747	+	0	0
RNn_00000666	chr1	13206234	13329408	+	8.47299	8.28474
RNn_00000668	chr1	13255062	13255759	+	2.1772	2.7847
RNn_00000669	chr1	13332691	13333875	-	2.77223	1.13234
RNn_00000671	chr1	13358301	13381636	-	4.00421	3.13999
RNn_00000672	chr1	13407998	13413756	+	27.9392	30.8508
RNn_00000673	chr1	13419633	13446599	-	165.845	148.772
RNn_00000674	chr1	13469096	13475997	+	1.83638	1.60463
RNn_00000676	chr1	13496297	13497899	+	5.2602	5.45325
RNn_00000677	chr1	13506049	13507380	+	0.080677	0.06903
RNn_00000678	chr1	13509955	13510113	+	0	0
RNn_00000680	chr1	13530859	13531483	-	1.98216	1.03445
RNn_00000681	chr1	13542591	13543052	+	3.45993	4.36014
RNn_00000682	chr1	13558763	13561270	-	26.4731	26.5788
RNn_00000683	chr1	13575403	13575969	+	185.657	175.978
RNn_00000684	chr1	13576008	13577817	-	8.18861	7.82294
RNn_00000685	chr1	13589926	13592282	-	2.36675	2.29637
RNn_00000687	chr1	13603595	13603838	-	0	0
RNn_00000689	chr1	13616277	13761551	+	12.4861	12.0297
RNn_00000690	chr1	13671585	13671922	-	0	0
RNn_00000691	chr1	13763928	13765764	+	18.8835	18.4884
RNn_00000693	chr1	13795298	13803713	+	41.5839	38.7718
RNn_00000694	chr1	13816466	13816846	-	4.5711	5.31801
RNn_00000695	chr1	13817080	13817232	-	7.35958	6.72273
RNn_00000696	chr1	13817252	13823672	+	18.1755	21.5259
RNn_00000697	chr1	13817305	13818846	-	0.866191	0.929998
RNn_00000698	chr1	13827559	13827826	-	27.7336	26.8926
RNn_00000699	chr1	13830840	13831401	-	0.202905	0.61436
RNn_00000700	chr1	13845889	13848573	+	2.78932	3.08013
RNn_00000701	chr1	13854541	13855001	-	0.233105	0
RNn_00000702	chr1	13855743	13860214	-	7.11252	8.34369
RNn_00000703	chr1	13884988	13885325	+	0	0.17178
RNn_00000704	chr1	13899835	13909756	-	0	0
RNn_00000705	chr1	13942634	13944060	+	0.088359	0.130317
RNn_00000706	chr1	13944089	13949107	+	0.189753	0
RNn_00000707	chr1	13957113	13961639	+	0.016481	0
RNn_00000709	chr1	13958046	13958751	+	0	0
RNn_00000710	chr1	13968822	13981184	+	18.4848	18.2078
RNn_00000711	chr1	13985048	13989328	-	0	0.082945
RNn_00000712	chr1	13994521	13996285	-	2.20618	1.31675
RNn_00000714	chr1	14029041	14029931	+	1.78399	0.95219
RNn_00000715	chr1	14035350	14042449	-	17.0908	19.2413
RNn_00000716	chr1	14041490	14042528	+	0	0
RNn_00000717	chr1	14065461	14084624	-	81.4077	75.8495
RNn_00000719	chr1	14130132	14130658	+	0	0
RNn_00000720	chr1	14130836	14131236	+	0	0
RNn_00000721	chr1	14138558	14144484	-	1.99906	1.97389
RNn_00000722	chr1	14155059	14155985	-	32.3979	32.8199
RNn_00000723	chr1	14158076	14158958	-	1.28191	1.55027
RNn_00000724	chr1	14165737	14166069	+	0	0
RNn_00000725	chr1	14186175	14191867	+	4.61679	3.65744
RNn_00000726	chr1	14239801	14244483	+	0.202375	0.410417
RNn_00000727	chr1	14244704	14247231	-	5.00376	5.49356
RNn_00000728	chr1	14263271	14263782	-	0	0
RNn_00000729	chr1	14266171	14271259	+	85.9845	86.2538
RNn_00000730	chr1	14266310	14266475	-	0	0
RNn_00000731	chr1	14300459	14305335	+	0	0
RNn_00000732	chr1	14319712	14321502	-	0.639908	0.885799
RNn_00000733	chr1	14353942	14358280	+	10.6321	8.50079
RNn_00000735	chr1	14392499	14403356	+	27.8809	26.4168
RNn_00000738	chr1	14421250	14429431	+	0	0
RNn_00000739	chr1	14429774	14430404	+	0	0
RNn_00000740	chr1	14432196	14433287	-	1.08474	0.824228
RNn_00000742	chr1	14445556	14446999	+	0.240344	0.33205
RNn_00000743	chr1	14457053	14464110	+	58.4958	48.0319
RNn_00000745	chr1	14470948	14472510	+	22.6007	23.2177
RNn_00000746	chr1	14481377	14484116	-	1.53039	1.15488
RNn_00000747	chr1	14505142	14505649	+	1.17333	0.724814
RNn_00000749	chr1	14515520	14515906	+	0.069419	0.160174
RNn_00000752	chr1	14593581	14594836	-	3.02378	2.17713
RNn_00000755	chr1	14670911	14676620	+	19.7493	21.2704
RNn_00000756	chr1	14693641	14696658	+	0.775125	0.272071
RNn_00000757	chr1	14707205	14712769	-	98.1544	112.743
RNn_00000758	chr1	14719099	14727977	+	6.59795	8.28163
RNn_00000759	chr1	14749225	14751736	+	0.315087	0.270435
RNn_00000760	chr1	14756527	14759743	+	0.551964	0.535335
RNn_00000761	chr1	14766951	14769462	+	0.14216	0.106452
RNn_00000762	chr1	14774236	14867776	+	1.60483	1.39705
RNn_00000763	chr1	14801435	14801948	+	0	0
RNn_00000764	chr1	14802414	14937573	+	0.059612	0.031607
RNn_00000765	chr1	14839780	14842288	+	0.21868	0.221522
RNn_00000766	chr1	14847029	14850238	+	1.71081	1.34404
RNn_00000767	chr1	14857404	14859912	+	0.462952	0.518059
RNn_00000768	chr1	14891831	14892345	+	0	0
RNn_00000769	chr1	14941053	14944944	+	0	0
RNn_00000770	chr1	14948849	14949700	-	0.882057	1.01639
RNn_00000771	chr1	14950427	14965786	+	52.9183	60.1661
RNn_00000772	chr1	14968235	14970219	+	0.592772	1.02081
RNn_00000773	chr1	14983905	14991847	-	146.074	127.541
RNn_00000774	chr1	15018350	15018793	+	0	0
RNn_00000776	chr1	15024028	15027411	+	1.48481	1.15862
RNn_00000777	chr1	15034201	15034752	+	0	0
RNn_00000778	chr1	15047588	15048121	+	0	0
RNn_00000779	chr1	15066201	15069560	-	2.20966	2.48969
RNn_00000780	chr1	15074469	15074971	+	0	0
RNn_00000781	chr1	15091353	15092011	+	0	0
RNn_00000782	chr1	15102086	15102621	+	0	0
RNn_00000783	chr1	15120670	15124026	-	3.59796	4.04581
RNn_00000784	chr1	15128938	15129444	+	0	0
RNn_00000785	chr1	15145803	15146461	+	0	0
RNn_00000786	chr1	15159458	15160978	-	0	0
RNn_00000788	chr1	15199466	15200026	-	0.652877	1.08174
RNn_00000789	chr1	15206998	15207534	-	8.26205	10.9777
RNn_00000790	chr1	15213701	15214288	-	0.164482	0.502506
RNn_00000791	chr1	15215917	15216393	-	4.49295	3.60142
RNn_00000792	chr1	15230579	15231001	-	0	0
RNn_00000793	chr1	15240561	15240995	-	1.16972	0.731024
RNn_00000794	chr1	15252445	15258813	-	6.8057	6.11047
RNn_00000795	chr1	15319589	15395501	-	7.2629	7.67158
RNn_00000796	chr1	15393322	15394029	+	0	0
RNn_00000797	chr1	15398607	15407470	-	0.327626	0.201585
RNn_00000798	chr1	15409484	15410900	+	0	0
RNn_00000799	chr1	15409999	15410867	-	0	0
RNn_00000800	chr1	15439815	15444798	-	19.3803	16.3509
RNn_00000801	chr1	15505913	15507791	-	0.109755	0.074415
RNn_00000802	chr1	15538473	15539105	+	0	0
RNn_00000803	chr1	15722217	15724090	-	0	0.034217
RNn_00000804	chr1	15675279	15677151	+	0.010419	0.028848
RNn_00000805	chr1	15739174	15739806	+	0	0
RNn_00000806	chr1	15764803	15765443	+	0	0
RNn_00000807	chr1	15786127	15787667	+	455.246	465.179
RNn_00000810	chr1	15873354	15882288	+	16.5684	17.1881
RNn_00000811	chr1	15875450	15877140	+	0.196896	0.437688
RNn_00000812	chr1	15898562	15901353	+	39.9613	45.9663
RNn_00000813	chr1	15907862	15913452	+	1.33533	1.11431
RNn_00000814	chr1	15939233	15940804	-	11.6535	13.5447
RNn_00000815	chr1	15949745	15951922	+	90.2427	81.5429
RNn_00000817	chr1	16007341	16008127	+	0	0
RNn_00000818	chr1	16012557	16013066	-	0	0
RNn_00000819	chr1	16013396	16013666	+	0	0
RNn_00000820	chr1	16016108	16028422	+	4.32081	3.86203
RNn_00000821	chr1	16043684	16044175	+	0	0
RNn_00000823	chr1	16048080	16049400	-	0	0
RNn_00000824	chr1	16064123	16065613	-	0.360367	0.101719
RNn_00000825	chr1	16071068	16094653	-	14.2792	12.5108
RNn_00000826	chr1	16110876	16111331	+	0	0
RNn_00000827	chr1	16113538	16115102	-	6.67874	5.32624
RNn_00000829	chr1	16129228	16131793	+	116.718	85.5256
RNn_00000830	chr1	16133019	16134328	-	0	0
RNn_00000833	chr1	16161708	16162013	-	0	0
RNn_00000834	chr1	16168205	16168540	-	0	0
RNn_00000835	chr1	16169721	16170074	+	0	0.228805
RNn_00000836	chr1	16172291	16175146	-	242.781	241.175
RNn_00000837	chr1	16188132	16357618	-	23.5365	23.0659
RNn_00000838	chr1	16229375	16229832	-	0.468334	0.613229
RNn_00000839	chr1	16378527	16379853	+	8.26425	8.90698
RNn_00000841	chr1	16397261	16399344	-	3.1697	2.95729
RNn_00000842	chr1	16425098	16426279	+	1.28857	0.796956
RNn_00000843	chr1	16428451	16428823	-	0.859499	0.638155
RNn_00000844	chr1	16428475	16428555	+	0	0
RNn_00000846	chr1	16456234	16457514	-	0	0
RNn_00000848	chr1	16546063	16546923	-	0	0
RNn_00000849	chr1	16554900	16555617	+	0	0
RNn_00000850	chr1	16557638	16627582	+	31.1225	29.8279
RNn_00000851	chr1	16567851	16569503	+	0.035511	0.061864
RNn_00000852	chr1	16631767	16632477	+	0	0.040395
RNn_00000854	chr1	16658037	16712615	+	8.77858	7.30187
RNn_00000855	chr1	16717564	16718949	+	0.385987	0.044724
RNn_00000856	chr1	16722401	16725572	+	3.13175	2.8366
RNn_00000857	chr1	16776808	16777961	-	0.646364	0.443109
RNn_00000858	chr1	16779335	16782652	+	3.37106	3.17536
RNn_00000859	chr1	16787233	16787613	-	0	0
RNn_00000860	chr1	16794618	16800040	-	23.9098	24.6591
RNn_00000861	chr1	16802788	16854495	-	66.3848	61.864
RNn_00000863	chr1	16816354	16823704	+	0	0
RNn_00000865	chr1	16865195	16865527	+	0	0
RNn_00000867	chr1	16888491	16889289	-	0.067247	0
RNn_00000869	chr1	16951008	16952185	-	0.520278	0.210484
RNn_00000871	chr1	16987421	16987855	+	0	0
RNn_00000873	chr1	17000673	17001686	+	92.507	76.1624
RNn_00000874	chr1	17036737	17039237	+	12.872	11.1869
RNn_00000875	chr1	17045670	17050073	+	44.4984	37.6082
RNn_00000876	chr1	17052457	17054286	+	2.98034	3.7372
RNn_00000877	chr1	17054798	17084868	-	35.4878	39.3573
RNn_00000878	chr1	17100539	17102507	+	0.426088	0.202615
RNn_00000879	chr1	17110062	17126962	+	43.9275	45.1667
RNn_00000880	chr1	17137871	17147642	+	19.2929	14.0642
RNn_00000882	chr1	17151058	17151380	-	0	0
RNn_00000884	chr1	17165919	17166737	+	0	0
RNn_00000885	chr1	17168967	17169293	-	0	0
RNn_00000888	chr1	17185421	17188552	-	0	0.11875
RNn_00000889	chr1	17190995	17191651	+	0	0
RNn_00000890	chr1	17193062	17193406	+	0	0
RNn_00000891	chr1	17209185	17233124	+	20.9686	21.968
RNn_00000892	chr1	17235337	17252823	-	15.7138	14.6287
RNn_00000893	chr1	17255693	17276472	-	36.9358	35.1238
RNn_00000894	chr1	17261897	17264449	+	1.34779	0.961983
RNn_00000895	chr1	17264706	17265048	+	0.771758	0.717464
RNn_00000897	chr1	17333884	17335830	-	5.55907	4.48821
RNn_00000898	chr1	17341379	17343027	+	8.03962	10.3507
RNn_00000899	chr1	17357878	17426156	+	20.2539	18.5136
RNn_00000900	chr1	17427199	17434001	-	49.4333	46.4875
RNn_00000901	chr1	17436448	17437774	-	0.04049	0.093736
RNn_00000903	chr1	17450847	17451550	-	0	0
RNn_00000904	chr1	17452983	17453486	+	0	0
RNn_00000905	chr1	17457674	17460331	-	0.162656	0.089714
RNn_00000906	chr1	17485348	17493051	-	15.0483	14.4768
RNn_00000907	chr1	17497050	17497750	-	3.27826	3.15243
RNn_00000908	chr1	17532883	17533891	+	0.826218	0.679309
RNn_00000910	chr1	17536330	17537909	+	4.49258	6.11796
RNn_00000911	chr1	17543666	17544112	+	0	0
RNn_00000912	chr1	17550124	17551384	-	0	0
RNn_00000913	chr1	17578007	17591535	+	13.3021	12.1534
RNn_00000914	chr1	17595688	17597588	-	22.5657	19.1468
RNn_00000915	chr1	17605939	17617578	-	6.97467	5.73959
RNn_00000916	chr1	17622650	17625645	-	0	0
RNn_00000917	chr1	17632104	17633798	-	4.9969	4.17858
RNn_00000918	chr1	17637489	17642495	-	0	0
RNn_00000919	chr1	17658540	17711128	-	21.7962	24.2481
RNn_00000923	chr1	17740966	17742675	+	1.88487	2.262
RNn_00000924	chr1	17754228	17754785	+	7.30704	7.07769
RNn_00000925	chr1	17758412	17761536	-	0	0
RNn_00000927	chr1	17800698	17807327	-	30.611	31.4346
RNn_00000928	chr1	17810958	17812669	-	0	0
RNn_00000929	chr1	17814264	17830551	-	15.164	14.2816
RNn_00000930	chr1	17870281	17871913	-	0.372353	0.264449
RNn_00000931	chr1	17872650	17875582	+	82.4987	74.1992
RNn_00000932	chr1	17878895	17881595	-	7.33855	7.56637
RNn_00000933	chr1	17885345	17886976	-	0	0
RNn_00000934	chr1	17909938	17918947	+	0.26281	0.782964
RNn_00000935	chr1	17959405	17979900	+	51.6774	49.2427
RNn_00000937	chr1	17985892	17988655	+	0.560094	0.493976
RNn_00000938	chr1	17995692	17999727	+	0	0
RNn_00000939	chr1	18071658	18076633	+	318.917	310.068
RNn_00000940	chr1	18147973	18148752	+	0	0
RNn_00000942	chr1	18279545	18310012	-	43.7726	41.5254
RNn_00000943	chr1	18336972	18362430	-	11.932	10.7644
RNn_00000944	chr1	18387951	18410862	-	2.83205	2.61357
RNn_00000945	chr1	18439268	18444164	-	0	0
RNn_00000946	chr1	18475637	18491857	+	61.9953	63.2983
RNn_00000947	chr1	18479223	18480092	+	0.215746	0.199975
RNn_00000950	chr1	18536738	18551799	+	0	0
RNn_00000951	chr1	18576387	18577608	-	0	0
RNn_00000952	chr1	18604383	18605737	+	0	0
RNn_00000953	chr1	18609716	18610538	-	0	0
RNn_00000954	chr1	18654749	18657435	+	39.1813	35.9896
RNn_00000955	chr1	18659090	18660353	-	1.94462	1.98321
RNn_00000956	chr1	18660377	18662135	+	2.74294	2.5454
RNn_00000957	chr1	18660772	18660927	-	0	0
RNn_00000958	chr1	18674809	18675702	+	18.5241	14.2802
RNn_00000959	chr1	18681796	18689285	-	8.83674	6.7044
RNn_00000960	chr1	18691273	18695676	-	55.7453	53.5111
RNn_00000961	chr1	18691354	18691973	+	0	0
RNn_00000962	chr1	18721927	18724116	+	251.893	242.787
RNn_00000963	chr1	18726698	18728631	+	0	0
RNn_00000964	chr1	18728483	18736570	-	0.06598	0.143359
RNn_00000965	chr1	18737450	18779932	-	17.3734	26.1309
RNn_00000967	chr1	18815115	18818725	+	0.87909	0.666964
RNn_00000969	chr1	18888107	18903482	+	42.2359	43.292
RNn_00000970	chr1	18910666	18912155	+	5.08821	4.78622
RNn_00000971	chr1	18917036	18917909	+	2.18768	2.90599
RNn_00000973	chr1	18956205	18956648	-	0	0
RNn_00000975	chr1	18980572	18981234	+	0	0
RNn_00000977	chr1	18986768	18987401	+	1.76645	1.9252
RNn_00000978	chr1	18990379	18991441	+	0	0.117131
RNn_00000979	chr1	19001997	19003476	+	72.413	65.3106
RNn_00000980	chr1	19004691	19005751	+	0	0
RNn_00000981	chr1	19035196	19044515	+	2.75382	2.51593
RNn_00000983	chr1	19075593	19106090	+	48.7854	49.1695
RNn_00000984	chr1	19135166	19138333	+	0.080866	0.286501
RNn_00000985	chr1	19142974	19149554	-	4.72634	4.63535
RNn_00000987	chr1	19176147	19177887	+	0.390953	0.224512
RNn_00000988	chr1	19196926	19198824	-	0	0.040356
RNn_00000989	chr1	19245243	19246322	+	0.78208	0.691428
RNn_00000990	chr1	19263205	19263504	+	0	0
RNn_00000991	chr1	19301655	19301813	+	0	0
RNn_00000993	chr1	19326011	19326508	+	0	0
RNn_00000995	chr1	19399673	19400323	+	0	0
RNn_00000996	chr1	19406177	19411267	+	11.1066	9.85507
RNn_00000997	chr1	19414604	19415934	+	0	0
RNn_00000998	chr1	19439880	19441676	-	3.88822	3.64083
RNn_00000999	chr1	19464051	19467134	+	0.445248	0.282344
RNn_00001000	chr1	19469112	19469285	-	0	0.457187
RNn_00001001	chr1	19469786	19573898	-	0.340397	0.166932
RNn_00001002	chr1	19580755	19583094	-	54.1512	57.1841
RNn_00001003	chr1	19632780	19635632	+	0.237222	0
RNn_00001004	chr1	19655775	19657036	+	0	0
RNn_00001005	chr1	19664725	19666029	+	0	0
RNn_00001006	chr1	19681478	19682771	+	0	0
RNn_00001007	chr1	19686834	19687295	-	0	0
RNn_00001008	chr1	19712638	19714119	+	0	0
RNn_00001009	chr1	19728167	19729612	+	2.25941	3.22948
RNn_00001010	chr1	19729974	19730742	-	0	0
RNn_00001012	chr1	19763864	19768287	+	0	0
RNn_00001013	chr1	19793901	19794068	-	0	0
RNn_00001014	chr1	19795927	19808250	+	11.5794	11.0217
RNn_00001016	chr1	19820971	19823599	-	0	0.199225
RNn_00001017	chr1	19876239	19879759	-	2.89409	2.43172
RNn_00001018	chr1	19909831	19911118	-	13.7008	10.345
RNn_00001019	chr1	19914638	19965762	-	14.2879	13.6762
RNn_00001020	chr1	19982224	19983169	+	0	0
RNn_00001021	chr1	19986001	19988038	+	0	0
RNn_00001023	chr1	20022600	20025754	-	0	0
RNn_00001024	chr1	20024356	20024941	+	0	0
RNn_00001025	chr1	20028667	20030536	+	0	0
RNn_00001027	chr1	20037110	20097655	+	30.7248	31.6375
RNn_00001028	chr1	20043240	20043563	-	0	0
RNn_00001029	chr1	20099199	20168960	-	11.6144	10.9088
RNn_00001030	chr1	20196615	20196937	+	3.22772	3.01045
RNn_00001031	chr1	20201838	20204140	+	2.1486	2.18782
RNn_00001032	chr1	20244470	20246387	+	0.46018	0.157449
RNn_00001034	chr1	20262093	20266796	-	0.586854	0.658168
RNn_00001036	chr1	20271827	20273305	+	4.73343	4.19508
RNn_00001037	chr1	20286617	20287980	-	0.078784	0.295257
RNn_00001038	chr1	20291376	20291624	-	0.954513	1.43476
RNn_00001039	chr1	20292933	20295832	+	10.5791	10.1932
RNn_00001040	chr1	20297841	20348935	+	9.66742	11.4185
RNn_00001041	chr1	20350361	20351059	-	76.7006	101.279
RNn_00001042	chr1	20354004	20374056	-	29.1792	27.5237
RNn_00001045	chr1	20413362	20414402	-	19.8545	18.5936
RNn_00001047	chr1	20425989	20428355	-	0	0
RNn_00001048	chr1	20434538	20437717	+	0	0
RNn_00001049	chr1	20439253	20439665	+	0	0
RNn_00001050	chr1	20441540	20442297	+	0.257817	0.325459
RNn_00001051	chr1	20442073	20442440	-	0.275892	0.4794
RNn_00001052	chr1	20444059	20446914	-	0.20287	0.032556
RNn_00001053	chr1	20465195	20469797	+	0	0
RNn_00001054	chr1	20488099	20489156	+	0.204798	0.359013
RNn_00001055	chr1	20496201	20496416	+	0	0.018175
RNn_00001056	chr1	20497232	20498209	-	0	0.75963
RNn_00001057	chr1	20513992	20514886	-	12.9668	10.1493
RNn_00001058	chr1	20533632	20539297	-	41.6587	41.0521
RNn_00001059	chr1	20568345	20570457	+	25.3905	28.6707
RNn_00001060	chr1	20583415	20588567	-	14.9797	13.135
RNn_00001062	chr1	20615618	20616658	+	0	0
RNn_00001063	chr1	20619693	20620442	-	0	0
RNn_00001064	chr1	20631188	20631772	+	2.17341	3.00966
RNn_00001065	chr1	20641234	20641407	-	10.2891	10.6412
RNn_00001067	chr1	20694629	20697461	-	24.9513	25.9801
RNn_00001068	chr1	20753815	20754719	-	1.24224	1.06943
RNn_00001069	chr1	20758771	20759194	+	43.3871	37.8411
RNn_00001070	chr1	20760992	20763012	+	0	0
RNn_00001071	chr1	20768076	20769671	+	0	0.909455
RNn_00001073	chr1	20794288	20794920	+	0	0
RNn_00001074	chr1	20809581	20839795	+	14.6951	12.259
RNn_00001075	chr1	20843332	20843511	-	0	0
RNn_00001076	chr1	20851589	20851990	+	0.111827	0
RNn_00001077	chr1	20851666	20852268	-	0.445528	0.102798
RNn_00001078	chr1	20870097	20870525	-	0	0
RNn_00001079	chr1	20887211	20887732	+	0	0
RNn_00001080	chr1	20892136	20893879	+	0.215662	0.213259
RNn_00001081	chr1	20893138	20905545	-	0	0
RNn_00001082	chr1	20904940	20905338	+	0	0
RNn_00001083	chr1	20917055	20917435	-	0.211538	0.417046
RNn_00001084	chr1	20952345	20953608	+	0.569896	0.196163
RNn_00001085	chr1	20975476	20980379	+	3.20872	3.45575
RNn_00001086	chr1	20995827	20996192	+	0	0
RNn_00001087	chr1	21003808	21020599	-	28.7922	28.1834
RNn_00001088	chr1	21026181	21026555	+	0	0
RNn_00001089	chr1	21053060	21081368	-	0.92893	0.555674
RNn_00001090	chr1	21094108	21094363	+	0	0
RNn_00001091	chr1	21094396	21096389	+	0	0
RNn_00001092	chr1	21119619	21120462	-	0	0
RNn_00001093	chr1	21135502	21136383	+	0	0
RNn_00001094	chr1	21141914	21158308	-	8.76638	8.89258
RNn_00001095	chr1	21163010	21163535	+	0	0
RNn_00001096	chr1	21203294	21206470	-	5.39686	4.23627
RNn_00001097	chr1	21268181	21270417	+	9.32391	8.90469
RNn_00001098	chr1	21292703	21294380	-	0.055108	0
RNn_00001100	chr1	21363529	21364394	+	0	0
RNn_00001101	chr1	21387219	21389501	+	0.044214	0.065485
RNn_00001102	chr1	21391609	21393009	+	0	0
RNn_00001103	chr1	21454319	21454705	-	0.320255	0.08863
RNn_00001104	chr1	21456714	21461331	+	0.886079	1.25022
RNn_00001105	chr1	21496717	21501593	+	0.784804	0.814574
RNn_00001106	chr1	21529127	21529522	+	0	0
RNn_00001107	chr1	21529620	21529979	+	0	0
RNn_00001108	chr1	21538394	21539896	+	1.09702	1.68847
RNn_00001109	chr1	21540366	21540838	-	0	0.113291
RNn_00001110	chr1	21560471	21561488	-	1.57764	1.16094
RNn_00001111	chr1	21596645	21605694	-	41.824	42.7281
RNn_00001112	chr1	21622401	21625487	-	0.386049	0.046191
RNn_00001113	chr1	21676762	21679764	+	3.93685	3.1002
RNn_00001114	chr1	21696619	21697679	+	5.9389	4.19791
RNn_00001116	chr1	21703784	21704284	+	68.2494	53.6098
RNn_00001117	chr1	21706651	21708442	-	0.776876	0.224612
RNn_00001118	chr1	21706671	21707639	+	0	0
RNn_00001119	chr1	21712365	21714143	+	0	0
RNn_00001120	chr1	21718003	21724102	-	4.82039	2.44754
RNn_00001121	chr1	21724103	21724389	+	2.19541	1.41254
RNn_00001122	chr1	21725248	21726543	+	0	0
RNn_00001124	chr1	21740077	21742656	-	5.62399	6.29599
RNn_00001127	chr1	21755693	21757585	-	0	0
RNn_00001128	chr1	21773058	21775212	+	0.475167	0.478592
RNn_00001129	chr1	21796819	21807288	+	5.43414	5.98123
RNn_00001131	chr1	21854226	21857922	+	0	0.071332
RNn_00001132	chr1	21862667	21867360	+	0	0
RNn_00001133	chr1	21882874	21883506	-	0.379708	0.231433
RNn_00001135	chr1	21992714	21993328	+	0.84047	0.271132
RNn_00001136	chr1	22038469	22038750	-	0	0
RNn_00001137	chr1	22061354	22062067	-	7.54061	8.32461
RNn_00001138	chr1	22066844	22068514	-	0	0
RNn_00001140	chr1	22075866	22076149	+	0.094596	0
RNn_00001141	chr1	22095408	22096448	-	0	0
RNn_00001142	chr1	22113582	22114495	+	0.106159	0.123173
RNn_00001143	chr1	22118527	22121295	+	27.9177	34.293
RNn_00001144	chr1	22144694	22145730	-	0	0
RNn_00001145	chr1	22162895	22163808	+	0.091179	0.106938
RNn_00001146	chr1	22167836	22170606	+	27.5528	16.0307
RNn_00001147	chr1	22192038	22193072	+	2.31339	2.09721
RNn_00001148	chr1	22210832	22211629	+	0	0
RNn_00001150	chr1	22220719	22221896	-	0.192786	0.547316
RNn_00001153	chr1	22379985	22389586	-	17.6543	19.0749
RNn_00001154	chr1	22395612	22395937	-	0	0
RNn_00001155	chr1	22404395	22406129	+	182.04	150.664
RNn_00001156	chr1	22408107	22408746	-	1.39993	1.02094
RNn_00001157	chr1	22411580	22412890	+	24.6869	23.7932
RNn_00001158	chr1	22416286	22416619	-	0.788792	0.583208
RNn_00001160	chr1	22451418	22451756	-	0	0
RNn_00001162	chr1	22476547	22479356	-	122.633	127.135
RNn_00001163	chr1	22504155	22568936	+	30.095	31.7271
RNn_00001165	chr1	22622176	22622777	+	19.1708	17.0351
RNn_00001166	chr1	22623159	22625332	+	2.34645	2.29673
RNn_00001167	chr1	22625433	22626137	+	4.39067	5.30483
RNn_00001168	chr1	22634642	22638211	+	595.488	653.142
RNn_00001170	chr1	22666172	22667989	+	2.32821	2.7297
RNn_00001172	chr1	22707524	22712089	-	128.007	133.405
RNn_00001174	chr1	22740892	22741246	-	0.677271	0.683317
RNn_00001176	chr1	22746119	22747122	+	0.187665	0.430948
RNn_00001177	chr1	22752461	22754656	-	495.656	499.83
RNn_00001178	chr1	22806105	22876304	+	9.00674	9.5117
RNn_00001179	chr1	22878315	22879891	-	0.613172	0.687745
RNn_00001180	chr1	22881404	22883918	-	4.27035	4.47656
RNn_00001181	chr1	22916915	22921315	-	5.07011	4.48233
RNn_00001182	chr1	22927412	22934514	+	26.4639	22.9222
RNn_00001183	chr1	23024520	23027423	+	0	0
RNn_00001184	chr1	23042100	23050137	-	3.13641	2.75634
RNn_00001186	chr1	23112589	23113771	-	0	0
RNn_00001187	chr1	23121431	23122623	-	0	0
RNn_00001188	chr1	23141404	23141616	-	0	0
RNn_00001189	chr1	23216108	23216317	-	0	0
RNn_00001191	chr1	23310113	23310396	-	0.561271	1.29286
RNn_00001192	chr1	23473273	23475773	-	190.265	161.537
RNn_00001194	chr1	23495609	23495892	-	0.047298	0
RNn_00001195	chr1	23537296	23577384	+	30.8373	31.1037
RNn_00001196	chr1	23578320	23601801	-	8.72841	8.05072
RNn_00001197	chr1	23598526	23599018	+	0	0.125735
RNn_00001198	chr1	23608353	23610220	+	0.743032	0.86469
RNn_00001199	chr1	23642312	23643772	-	41.7551	36.2391
RNn_00001200	chr1	23645166	23646290	-	0	0
RNn_00001201	chr1	23653098	23653835	+	0	0
RNn_00001202	chr1	23664580	23666118	-	0	0
RNn_00001203	chr1	23677385	23679067	-	0.513463	0.606342
RNn_00001204	chr1	23686814	23687098	+	0	0
RNn_00001205	chr1	23690382	23691168	+	0	0
RNn_00001206	chr1	23695880	23696630	+	0	0
RNn_00001207	chr1	23723873	23761603	+	28.2247	30.5053
RNn_00001208	chr1	23762184	23763989	+	3.40076	4.09966
RNn_00001209	chr1	23773704	23791557	+	14.3726	13.1179
RNn_00001210	chr1	23811953	23812282	+	0	0
RNn_00001211	chr1	23817279	23827303	+	0.246515	0.243551
RNn_00001212	chr1	23839202	23842371	+	6.4726	5.97947
RNn_00001213	chr1	23845758	23853766	-	0.09605	0.32424
RNn_00001215	chr1	23913155	23916914	+	40.1094	47.548
RNn_00001216	chr1	23916912	23918942	-	0.108731	0.44082
RNn_00001218	chr1	23951926	23954161	+	1.36288	1.98419
RNn_00001220	chr1	23962641	23969478	+	13.525	14.2786
RNn_00001221	chr1	23986272	23991571	+	95.0248	109.872
RNn_00001222	chr1	23997505	23998417	+	12.7989	17.1633
RNn_00001223	chr1	23999858	24001888	-	37.6347	36.7563
RNn_00001224	chr1	24013374	24014223	-	0.209444	0.169432
RNn_00001226	chr1	24017097	24018788	-	0	0
RNn_00001227	chr1	24031402	24032068	-	0.271204	0.185869
RNn_00001228	chr1	24035456	24035752	+	0.322625	0.104356
RNn_00001229	chr1	24052702	24080688	+	10.4311	9.1905
RNn_00001230	chr1	24061254	24061634	-	0	0
RNn_00001233	chr1	24121772	24122383	-	50.1714	47.6888
RNn_00001234	chr1	24152060	24153589	+	0.617844	0.470645
RNn_00001235	chr1	24154582	24208933	-	23.1247	21.4288
RNn_00001236	chr1	24224663	24225201	-	0	0
RNn_00001238	chr1	24232549	24235013	-	0	0
RNn_00001239	chr1	24251473	24350470	-	7.86445	8.32271
RNn_00001240	chr1	24315972	24317120	+	0	0
RNn_00001243	chr1	24434907	24435308	+	0	0
RNn_00001244	chr1	24450315	24455223	+	0	0
RNn_00001245	chr1	24465674	24466485	-	0	0
RNn_00001247	chr1	24496340	24505255	+	0.006026	0
RNn_00001250	chr1	24575627	24579677	+	0.752664	0.538728
RNn_00001251	chr1	24581599	24581984	-	0	0
RNn_00001252	chr1	24604421	24616011	+	3.68406	3.85066
RNn_00001253	chr1	24618985	24619783	+	0	0
RNn_00001254	chr1	24627113	24627547	-	2.61695	3.0799
RNn_00001255	chr1	24630396	24630851	-	0	0
RNn_00001256	chr1	24634106	24643180	-	26.8511	26.7736
RNn_00001257	chr1	24641518	24642898	+	0	0
RNn_00001258	chr1	24649899	24651053	+	0	0
RNn_00001259	chr1	24651077	24652023	+	0	0
RNn_00001260	chr1	24657038	24660576	-	28.668	25.7563
RNn_00001261	chr1	24668596	24674574	+	7.18371	6.96729
RNn_00001262	chr1	24678423	24743695	-	16.7936	17.7429
RNn_00001264	chr1	24746175	24747853	+	3.3085	2.52799
RNn_00001265	chr1	24747505	24747942	-	11.1203	10.7935
RNn_00001269	chr1	24787138	24787520	+	0	0
RNn_00001270	chr1	24799025	24799891	-	0.147496	0.052907
RNn_00001271	chr1	24801378	24804159	+	0.038627	0.033422
RNn_00001272	chr1	24812026	24814808	-	49.9899	47.5529
RNn_00001273	chr1	24818996	24819550	-	0.048406	0.545043
RNn_00001274	chr1	24860206	24867682	+	116.587	111.567
RNn_00001275	chr1	24868060	24870113	-	9.14344	9.85397
RNn_00001276	chr1	24871566	24904846	+	11.0753	10.2706
RNn_00001277	chr1	24906234	24906521	-	6.84631	7.23043
RNn_00001278	chr1	24908596	24910544	-	7.39055	8.69162
RNn_00001279	chr1	24929600	24929946	-	0	0
RNn_00001280	chr1	24935174	24936895	-	2.28496	2.54297
RNn_00001281	chr1	24953722	24961193	+	22.4555	22.2681
RNn_00001282	chr1	24960879	24963497	-	2.07852	3.02867
RNn_00001283	chr1	25008870	25012059	+	5.31344	5.1287
RNn_00001284	chr1	25060337	25153936	-	12.8911	13.2907
RNn_00001285	chr1	25250486	25252254	+	0.167054	0.350409
RNn_00001286	chr1	25258211	25266387	+	0	0.024389
RNn_00001287	chr1	25317500	25317691	-	0	0
RNn_00001289	chr1	25402872	25403840	+	0	0
RNn_00001290	chr1	25415562	25423721	-	0.439732	0.301138
RNn_00001291	chr1	25474033	25489038	-	26.8995	29.9243
RNn_00001292	chr1	25515387	25517979	-	0	0
RNn_00001293	chr1	25525461	25530688	-	36.0899	52.0433
RNn_00001294	chr1	25536621	25543787	-	17.9353	18.5933
RNn_00001295	chr1	25539574	25539859	-	0.186617	0.406025
RNn_00001296	chr1	25556218	25662479	-	0.68414	0.886607
RNn_00001298	chr1	25674969	25676705	-	0.381262	0.10706
RNn_00001299	chr1	25704577	25705393	-	0	0
RNn_00001300	chr1	25713140	25714396	-	34.2748	36.7177
RNn_00001301	chr1	25762637	25764671	+	6.05436	6.6852
RNn_00001302	chr1	25786484	25787780	+	3.82862	2.09727
RNn_00001303	chr1	25799066	25799836	+	0	0
RNn_00001304	chr1	25800761	25801600	-	0	0
RNn_00001306	chr1	25836784	25837101	+	0	0
RNn_00001307	chr1	25861636	25865490	-	0.231012	0.366839
RNn_00001310	chr1	25918125	25951800	+	16.747	15.1022
RNn_00001311	chr1	25948393	25949727	-	1.26485	0.535058
RNn_00001313	chr1	26067119	26068117	+	4.80492	4.41606
RNn_00001314	chr1	26084874	26085887	+	0	0
RNn_00001315	chr1	26091083	26096656	-	2.70502	2.73498
RNn_00001317	chr1	26104690	26104935	-	1.05423	0.763504
RNn_00001318	chr1	26134752	26135669	+	0	0.24984
RNn_00001320	chr1	26139141	26151634	-	0	0
RNn_00001322	chr1	26197737	26199119	-	0	0
RNn_00001323	chr1	26219308	26298735	-	47.9594	51.9881
RNn_00001327	chr1	26322133	26322880	-	0	0
RNn_00001328	chr1	26341762	26343257	-	2.74154	3.60732
RNn_00001329	chr1	26396131	26397997	+	0	0
RNn_00001332	chr1	26456287	26467030	-	19.5208	18.2104
RNn_00001333	chr1	26486723	26504340	+	304.689	350.639
RNn_00001334	chr1	26528002	26528809	-	16.4577	18.6666
RNn_00001335	chr1	26530418	26531447	+	0	0
RNn_00001336	chr1	26572569	26575030	+	2.27114	1.15245
RNn_00001337	chr1	26624988	26625317	+	0	0
RNn_00001338	chr1	26626285	26626806	+	0	0
RNn_00001339	chr1	26652367	26652700	-	0	0
RNn_00001340	chr1	26667509	26670727	+	0	0
RNn_00001341	chr1	26680276	26680551	-	0	0
RNn_00001342	chr1	26683020	26683430	-	0	0
RNn_00001343	chr1	26705015	26711017	+	7.16128	7.3564
RNn_00001344	chr1	26715227	26719211	+	0.797145	0.600096
RNn_00001345	chr1	26738985	26741655	-	0	0
RNn_00001346	chr1	26758739	26761172	-	8.6094	6.06215
RNn_00001348	chr1	26803910	26805497	+	0	0
RNn_00001349	chr1	26858138	26864117	+	10.8228	10.6538
RNn_00001350	chr1	26877341	26878180	+	0	0
RNn_00001351	chr1	26901660	26907211	-	9.3783	8.79764
RNn_00001352	chr1	26941490	26943639	+	16.063	12.6649
RNn_00001353	chr1	26946938	26947544	-	0	0.182797
RNn_00001354	chr1	26952782	26953687	-	0.204208	0.201607
RNn_00001356	chr1	26993895	26998458	+	0.027913	0.027513
RNn_00001357	chr1	26999928	27001896	-	1.08287	0.891747
RNn_00001358	chr1	27007756	27010044	+	0.046947	0.027081
RNn_00001359	chr1	27014988	27015444	-	0	0
RNn_00001360	chr1	27025722	27049353	+	3.41769	3.11822
RNn_00001361	chr1	27050789	27052065	+	7.88583	7.50548
RNn_00001362	chr1	27059778	27062316	+	17.3479	17.037
RNn_00001363	chr1	27071941	27072754	-	0	0
RNn_00001364	chr1	27073576	27073794	-	0	0
RNn_00001365	chr1	27077769	27080510	-	12.2651	10.6834
RNn_00001366	chr1	27127673	27130166	-	22.9614	22.7933
RNn_00001368	chr1	27160886	27164737	-	19.4172	20.7821
RNn_00001369	chr1	27176015	27176518	+	0	0
RNn_00001370	chr1	27207702	27208318	-	0	0
RNn_00001371	chr1	27229567	27230239	-	0	0
RNn_00001372	chr1	27230477	27230816	-	0	0
RNn_00001373	chr1	27241338	27248405	-	9.53982	8.54343
RNn_00001374	chr1	27243032	27244001	-	4.41939	5.21333
RNn_00001376	chr1	27290941	27293379	+	1.54091	0.595815
RNn_00001377	chr1	27320865	27329031	-	23.2179	21.4377
RNn_00001378	chr1	27381988	27384161	-	1.08263	1.15402
RNn_00001380	chr1	27401603	27401955	-	0	0
RNn_00001382	chr1	27422714	27504158	-	2.60079	3.06671
RNn_00001384	chr1	27541610	27541983	+	0	0
RNn_00001385	chr1	27544225	27553524	+	0	0
RNn_00001386	chr1	27593143	27593484	-	43.9188	30.7285
RNn_00001388	chr1	27611444	27612408	+	0	0
RNn_00001389	chr1	27641915	27645352	+	25.6723	19.7696
RNn_00001390	chr1	27646882	27647736	+	69.9547	71.4038
RNn_00001391	chr1	27648384	27648749	-	0.882808	0.39349
RNn_00001392	chr1	27648884	27649099	-	0.394688	0.591177
RNn_00001393	chr1	27650052	27664865	-	25.3605	23.9627
RNn_00001394	chr1	27669532	27670735	+	0	0
RNn_00001396	chr1	27695137	27696602	+	0	0.084567
RNn_00001397	chr1	27697222	27700202	-	26.3709	31.7987
RNn_00001398	chr1	27721533	27722071	-	0.398743	0
RNn_00001399	chr1	27735470	27735800	+	8.80956	8.46952
RNn_00001400	chr1	27739994	27754088	+	21.0589	20.4078
RNn_00001401	chr1	27757897	27760907	-	0.244937	0
RNn_00001402	chr1	27775647	27781389	-	0	0.047265
RNn_00001403	chr1	27806730	27807419	-	0.038935	0
RNn_00001404	chr1	27846227	27846707	-	0	0
RNn_00001405	chr1	27864143	27864423	-	0	0
RNn_00001406	chr1	27944153	27944863	-	0.651922	0.26155
RNn_00001407	chr1	27970035	27975616	+	0	0
RNn_00001408	chr1	27989555	28017549	+	7.38142	9.03848
RNn_00001410	chr1	28025433	28053086	-	53.3528	56.7126
RNn_00001411	chr1	28053400	28055603	+	6.20948	6.85638
RNn_00001412	chr1	28055993	28058832	-	14.0734	9.11141
RNn_00001413	chr1	28060422	28112730	-	19.7756	20.1245
RNn_00001415	chr1	28133845	28136570	-	10.4737	12.5083
RNn_00001417	chr1	28142165	28143364	-	9.0269	8.16719
RNn_00001418	chr1	28173000	28174684	+	0.733206	0.560523
RNn_00001419	chr1	28189964	28190820	-	1.36051	1.55535
RNn_00001420	chr1	28191183	28191324	-	0	0.349225
RNn_00001421	chr1	28221001	28222804	+	24.7831	27.3634
RNn_00001422	chr1	28241492	28242601	+	0.031894	0
RNn_00001424	chr1	28263971	28264504	-	0	0
RNn_00001425	chr1	28264694	28264912	+	0	0
RNn_00001427	chr1	28278513	28280156	+	0.604089	0.490168
RNn_00001428	chr1	28323051	28325386	+	110.342	101.894
RNn_00001429	chr1	28327539	28362528	-	0.038517	0.542026
RNn_00001430	chr1	28362914	28363185	+	0	0.105518
RNn_00001431	chr1	28364362	28387108	-	2.20742	0.689969
RNn_00001432	chr1	28400983	28415273	+	38.4687	36.049
RNn_00001433	chr1	28417143	28419404	-	0	0
RNn_00001434	chr1	28481203	28481771	+	0	0
RNn_00001435	chr1	28491774	28492106	+	0	0
RNn_00001436	chr1	28518807	28521620	-	17.5097	16.9912
RNn_00001437	chr1	28557236	28561365	-	9.50447	6.59021
RNn_00001438	chr1	28597557	28602580	+	27.0888	22.7844
RNn_00001439	chr1	28615116	28628751	-	21.9471	18.0143
RNn_00001440	chr1	28631770	28632569	+	0.085521	0
RNn_00001441	chr1	28632100	28632562	-	0.31506	0
RNn_00001442	chr1	28634911	28635579	+	0.328488	0.089259
RNn_00001443	chr1	28660516	28664206	-	0.178558	0.187857
RNn_00001444	chr1	28669433	28697001	-	7.61378	6.60293
RNn_00001445	chr1	28707075	28721213	+	43.1411	41.012
RNn_00001446	chr1	28724619	28732444	+	6.20877	5.18005
RNn_00001447	chr1	28734161	28735900	+	0.01544	0.07125
RNn_00001448	chr1	28736289	28739078	+	0	0
RNn_00001452	chr1	28828614	28828913	-	0.031044	0
RNn_00001454	chr1	28855739	28858236	+	0	0
RNn_00001455	chr1	28903445	28908714	+	78.4314	77.9336
RNn_00001456	chr1	28938980	28951860	+	70.6343	65.6925
RNn_00001457	chr1	28955307	28957835	-	2.31459	2.54568
RNn_00001458	chr1	28968531	28974921	+	4.16066	4.04263
RNn_00001459	chr1	28982909	28983815	-	0	0
RNn_00001460	chr1	29000022	29001273	-	19.0474	18.544
RNn_00001461	chr1	29000983	29001202	+	19.6338	19.7289
RNn_00001462	chr1	29003623	29007005	-	1.14514	0.868215
RNn_00001463	chr1	29018854	29019177	+	0	0
RNn_00001464	chr1	29024688	29039815	+	32.1546	29.3909
RNn_00001465	chr1	29049527	29050057	+	0	0
RNn_00001466	chr1	29079594	29081264	-	2.27177	2.39567
RNn_00001469	chr1	29126231	29126485	-	1.50867	4.03121
RNn_00001472	chr1	29230139	29230679	+	4.08293	3.48302
RNn_00001473	chr1	29234029	29237272	-	3.36021	3.37251
RNn_00001474	chr1	29249900	29251325	+	0.125134	0.164152
RNn_00001475	chr1	29251983	29254727	+	0.558852	0.500039
RNn_00001476	chr1	29255437	29258031	-	8.89541	9.06521
RNn_00001477	chr1	29266556	29266913	-	0	0
RNn_00001478	chr1	29281323	29283297	-	3.46366	3.87393
RNn_00001479	chr1	29306826	29313466	-	4.77937	5.169
RNn_00001480	chr1	29337283	29337966	+	0	0
RNn_00001481	chr1	29344649	29347719	+	19.6431	16.2335
RNn_00001482	chr1	29348548	29348785	-	1.35071	0.963781
RNn_00001483	chr1	29348561	29349743	+	21.6427	21.072
RNn_00001484	chr1	29351232	29355207	-	1.95332	2.3704
RNn_00001485	chr1	29378663	29378926	-	0	0.104878
RNn_00001486	chr1	29419431	29422582	+	0	0
RNn_00001487	chr1	29437265	29450240	+	11.6438	9.27957
RNn_00001489	chr1	29490298	29491544	-	0.258528	0.245564
RNn_00001490	chr1	29495933	29497688	-	9.21315	9.23776
RNn_00001491	chr1	29517344	29532005	-	32.7657	40.723
RNn_00001492	chr1	29540980	29579918	-	17.6618	18.6957
RNn_00001493	chr1	29591756	29592159	+	42.8219	46.6022
RNn_00001494	chr1	29608066	29628684	+	35.2008	35.7253
RNn_00001495	chr1	29649933	29652340	+	22.76	18.3921
RNn_00001496	chr1	29655031	29661987	-	34.4671	31.1462
RNn_00001497	chr1	29694584	29695036	-	4.8502	6.4087
RNn_00001500	chr1	29747780	29774536	-	4.17614	3.69458
RNn_00001501	chr1	29774547	29775607	-	4.46452	4.59039
RNn_00001503	chr1	29829368	29831271	+	0	0.095868
RNn_00001504	chr1	29840493	29840816	-	0	0
RNn_00001506	chr1	29867922	29870306	+	0.144558	0.311107
RNn_00001508	chr1	29893477	29896309	-	0	0
RNn_00001509	chr1	29920740	29921027	-	0	0
RNn_00001510	chr1	29923502	29936558	+	22.2175	21.5923
RNn_00001511	chr1	29942447	29943943	+	0.071785	0.082816
RNn_00001512	chr1	29946464	29948493	-	2.59372	1.84222
RNn_00001513	chr1	29963546	29964258	-	0	0.086953
RNn_00001514	chr1	29964686	29965226	+	0	0
RNn_00001515	chr1	29980360	29980654	+	0	0
RNn_00001516	chr1	30015126	30016476	+	0	0
RNn_00001519	chr1	30042539	30047275	+	0	0
RNn_00001523	chr1	30093168	30106423	+	16.2487	16.2786
RNn_00001524	chr1	30189819	30194683	+	1.85625	1.71651
RNn_00001525	chr1	30135021	30135346	+	0	0
RNn_00001526	chr1	30135701	30136360	+	0	0.04696
RNn_00001527	chr1	30143337	30146024	+	0	0
RNn_00001528	chr1	30156276	30160014	-	65.9179	68.8535
RNn_00001529	chr1	30170932	30172415	-	0.32586	0.543016
RNn_00001530	chr1	30188680	30189636	+	0.038944	0.043424
RNn_00001531	chr1	30189819	30190625	-	0.450011	0.518314
RNn_00001532	chr1	30191841	30193261	-	0.160302	0.163244
RNn_00001534	chr1	30215869	30220349	-	104.857	106.082
RNn_00001535	chr1	30246801	30251521	+	0.549365	0.686717
RNn_00001536	chr1	30271142	30271533	-	0	0
RNn_00001537	chr1	30278398	30279918	+	0.511185	0.605352
RNn_00001538	chr1	30306544	30308439	-	1.13805	1.70499
RNn_00001540	chr1	30316449	30316736	+	0	0
RNn_00001541	chr1	30323118	30324815	-	0.031643	0.036506
RNn_00001543	chr1	30367065	30370890	+	1.2209	1.68834
RNn_00001544	chr1	30373484	30373849	-	0	0
RNn_00001545	chr1	30405061	30407431	-	0	0
RNn_00001547	chr1	30444913	30449611	+	0	0
RNn_00001548	chr1	30471264	30474209	+	3.16501	3.59945
RNn_00001549	chr1	30487934	30499934	-	19.2535	16.0985
RNn_00001551	chr1	30529252	30529858	-	0.155202	0.102121
RNn_00001552	chr1	30534359	30537181	+	98.3601	86.7048
RNn_00001553	chr1	30537682	30553615	-	20.805	25.292
RNn_00001554	chr1	30538167	30538695	-	0.143523	0.232795
RNn_00001556	chr1	30570891	30571231	-	0	0
RNn_00001557	chr1	30577213	30577741	-	0	0
RNn_00001558	chr1	30581644	30582144	-	0	0
RNn_00001559	chr1	30586320	30586906	+	0	0
RNn_00001560	chr1	30601633	30604639	-	2.98385	2.8988
RNn_00001561	chr1	30625870	30632006	+	0	0
RNn_00001562	chr1	30625920	30626215	-	0	0
RNn_00001563	chr1	30638314	30650801	+	0.891462	1.13125
RNn_00001565	chr1	30673409	30676864	+	3.79933	3.21235
RNn_00001566	chr1	30678003	30682214	+	34.0485	32.025
RNn_00001567	chr1	30692787	30710230	-	11.2208	9.78421
RNn_00001568	chr1	30734538	30735997	+	0	0
RNn_00001569	chr1	30752909	30755463	+	0	0
RNn_00001570	chr1	30768850	30772645	-	4.45377	4.45322
RNn_00001572	chr1	30785492	30907732	-	20.9217	21.485
RNn_00001574	chr1	30886192	30886347	+	0	0
RNn_00001575	chr1	30910570	30910722	+	0	0
RNn_00001576	chr1	30924215	30945998	+	18.2096	16.3823
RNn_00001577	chr1	30948236	30950318	-	1.72897	2.88227
RNn_00001579	chr1	31002325	31007055	-	12.2139	14.873
RNn_00001580	chr1	31048123	31049965	-	2.82571	2.33967
RNn_00001581	chr1	31110154	31130620	+	0	0
RNn_00001582	chr1	31139005	31143546	+	7.61591	5.90231
RNn_00001583	chr1	31148933	31150281	+	0.557732	1.45847
RNn_00001584	chr1	31150452	31151612	-	3.81159	4.95632
RNn_00001585	chr1	31163213	31164164	-	0	0
RNn_00001586	chr1	31167402	31293397	-	33.2713	30.6476
RNn_00001587	chr1	31268803	31270920	+	0.126843	0.029267
RNn_00001588	chr1	31291179	31292009	+	0	0
RNn_00001589	chr1	31300392	31305804	-	0.38915	0.48315
RNn_00001590	chr1	31305766	31306275	+	0	0
RNn_00001591	chr1	31307165	31308062	+	0.489509	0.181789
RNn_00001592	chr1	31321306	31330796	+	41.1786	45.7039
RNn_00001593	chr1	31342388	31345078	+	1.1723	1.3419
RNn_00001594	chr1	31362805	31364904	-	0.119137	0.32967
RNn_00001595	chr1	31366893	31367821	+	0.340218	0.077183
RNn_00001596	chr1	31371531	31373090	-	0	0.008742
RNn_00001597	chr1	31397902	31407809	+	10.9433	9.13565
RNn_00001598	chr1	31441689	31442438	-	0	0
RNn_00001599	chr1	31459081	31462210	+	3.89217	3.53419
RNn_00001600	chr1	31464921	31498237	+	14.0754	13.8874
RNn_00001601	chr1	31501971	31502899	-	71.7054	70.8264
RNn_00001602	chr1	31513237	31528431	+	27.1417	25.2391
RNn_00001603	chr1	31532850	31540252	-	22.3343	24.5209
RNn_00001604	chr1	31554372	31556242	-	0.257884	0.082274
RNn_00001606	chr1	31597788	31598189	-	0	0.156917
RNn_00001607	chr1	31598370	31598895	-	0.331828	0
RNn_00001608	chr1	31705732	31710765	+	0.221388	0.287924
RNn_00001609	chr1	31720154	31721203	-	0.130583	0.091763
RNn_00001610	chr1	31723111	31723487	-	0	0
RNn_00001611	chr1	31739985	31740385	+	10.9837	17.9983
RNn_00001612	chr1	31755871	31756270	+	0	0
RNn_00001613	chr1	31760094	31762142	+	2.17825	2.18595
RNn_00001614	chr1	31768530	31770574	+	17.6872	21.1413
RNn_00001615	chr1	31772724	31808912	-	21.4616	22.7441
RNn_00001616	chr1	31796161	31796749	-	0.091224	0
RNn_00001617	chr1	31829563	31830673	-	0	0.502148
RNn_00001619	chr1	31848461	31848631	+	0	0
RNn_00001620	chr1	31857502	31869101	-	5.08204	4.10742
RNn_00001621	chr1	31870455	31871450	+	2.29974	3.06307
RNn_00001622	chr1	31880368	31887713	-	1.5519	1.94255
RNn_00001625	chr1	31908396	31908604	+	0	0
RNn_00001626	chr1	31912906	31914553	+	0	0
RNn_00001628	chr1	31977047	31987874	+	7.03158	6.25709
RNn_00001629	chr1	32003405	32004130	+	0.4735	0.589706
RNn_00001630	chr1	32030262	32031678	+	37.3546	31.5051
RNn_00001631	chr1	32077623	32079996	+	0.51407	0.53422
RNn_00001633	chr1	32094481	32107634	-	25.5998	27.0601
RNn_00001634	chr1	32152291	32154419	+	4.58951	3.71863
RNn_00001635	chr1	32157457	32158385	+	0	0
RNn_00001636	chr1	32159275	32159723	-	0	0
RNn_00001637	chr1	32176542	32183192	+	0.808164	1.41847
RNn_00001638	chr1	32198796	32202175	+	7.03135	8.62133
RNn_00001640	chr1	32218502	32229505	-	20.3816	19.475
RNn_00001641	chr1	32243851	32244228	-	0	0
RNn_00001642	chr1	32265632	32282505	+	36.8095	50.9499
RNn_00001643	chr1	32302469	32305858	-	0.11835	0.299346
RNn_00001644	chr1	32318298	32320804	-	0	0.037782
RNn_00001645	chr1	32328500	32333610	-	9.35368	7.15792
RNn_00001648	chr1	32366261	32372233	-	51.7042	49.6306
RNn_00001649	chr1	32380617	32381045	-	0	0
RNn_00001651	chr1	32396161	32396786	-	0	0
RNn_00001652	chr1	32403573	32405011	-	0.149723	0.322666
RNn_00001653	chr1	32412925	32419219	+	34.6576	38.5757
RNn_00001654	chr1	32415398	32416369	+	18.9806	19.8353
RNn_00001657	chr1	32433701	32469416	-	83.6164	78.4792
RNn_00001659	chr1	32472300	32472805	-	0	0.122174
RNn_00001660	chr1	32503280	32503672	-	0	0
RNn_00001661	chr1	32510013	32513970	+	57.4905	60.5237
RNn_00001662	chr1	32522934	32545990	+	9.7379	8.54482
RNn_00001663	chr1	32554049	32557801	+	0.04295	0.04955
RNn_00001665	chr1	32597607	32603299	-	58.7175	67.1022
RNn_00001666	chr1	32622123	32643874	-	8.65513	8.69403
RNn_00001668	chr1	32669155	32669433	+	0	0
RNn_00001669	chr1	32717035	32739486	-	60.1676	51.8615
RNn_00001670	chr1	32735842	32736894	-	0.133519	0.024332
RNn_00001671	chr1	32739974	32740748	-	0.20799	0.279943
RNn_00001672	chr1	32778319	32779992	-	15.836	17.0644
RNn_00001673	chr1	32781770	32781964	+	17.2801	13.2918
RNn_00001674	chr1	32786100	32786550	-	0	0
RNn_00001676	chr1	32850659	32856049	-	0.897078	0.980308
RNn_00001677	chr1	32859199	32859537	-	3.20006	1.86328
RNn_00001678	chr1	32859740	32862265	-	1373.25	1290.01
RNn_00001679	chr1	32890088	32891766	+	0.062616	0.036919
RNn_00001680	chr1	32891774	32893680	-	4.95121	4.72045
RNn_00001682	chr1	32929964	32930482	-	0	0
RNn_00001683	chr1	32947073	32948938	+	46.9443	42.0567
RNn_00001684	chr1	32965025	32967066	-	0.557566	0.575777
RNn_00001685	chr1	32970537	32971438	-	0	0
RNn_00001687	chr1	32996069	32999653	-	0	0.246962
RNn_00001688	chr1	33012761	33015817	-	0.153958	0.135346
RNn_00001689	chr1	33034978	33035723	-	0.741844	0.778001
RNn_00001691	chr1	33092011	33092986	+	0.082027	0.025828
RNn_00001692	chr1	33103417	33106698	+	1.11423	1.34032
RNn_00001693	chr1	33123876	33124647	-	0	0
RNn_00001695	chr1	33155685	33156857	+	8.0709	9.92503
RNn_00001696	chr1	33157506	33163161	+	16.8284	18.0371
RNn_00001697	chr1	33218367	33219574	+	6.78995	7.88549
RNn_00001698	chr1	33220223	33225958	+	17.6824	17.7945
RNn_00001699	chr1	33231511	33232948	+	2.07086	1.6898
RNn_00001701	chr1	33231024	33232552	-	0.598741	0.647103
RNn_00001703	chr1	33253232	33253564	+	0	0
RNn_00001704	chr1	33264228	33269477	-	5.15378	9.35603
RNn_00001705	chr1	33281580	33284557	+	0	0.020815
RNn_00001706	chr1	33283620	33284643	-	0	0
RNn_00001707	chr1	33292881	33293201	+	0	0
RNn_00001708	chr1	33298586	33302236	+	86.2166	84.2954
RNn_00001709	chr1	33315091	33317346	+	0	0
RNn_00001710	chr1	33318201	33318359	-	0	0
RNn_00001711	chr1	33320964	33321777	-	0	0
RNn_00001712	chr1	33326470	33326996	-	0	0
RNn_00001713	chr1	33328562	33328917	+	18.6216	18.5237
RNn_00001714	chr1	33336557	33342876	-	0.333133	0.139466
RNn_00001716	chr1	33362542	33365960	-	0	0.028383
RNn_00001717	chr1	33421467	33428320	-	16.8503	16.8075
RNn_00001718	chr1	33430168	33469305	-	18.1288	18.5964
RNn_00001719	chr1	33456362	33456952	-	0.254268	0.948732
RNn_00001721	chr1	33502809	33513435	-	34.7906	37.6872
RNn_00001723	chr1	33582537	33583705	+	0.091926	0.025629
RNn_00001724	chr1	33582670	33583219	-	0	0
RNn_00001725	chr1	33594288	33595122	-	14.3223	10.1058
RNn_00001727	chr1	33620775	33621935	-	42.5817	39.888
RNn_00001728	chr1	33629025	33630591	+	0	0
RNn_00001729	chr1	33631452	33632456	+	8.92125	8.50801
RNn_00001731	chr1	33674354	33682850	-	3.86248	4.83765
RNn_00001733	chr1	33683731	33683957	+	0.938527	0.425738
RNn_00001734	chr1	33691252	33691792	-	0.00629	0
RNn_00001735	chr1	33692233	33694950	-	2.18275	2.1799
RNn_00001736	chr1	33736835	33737220	+	4.47273	5.99699
RNn_00001738	chr1	33829090	33838111	-	0.630807	0.79858
RNn_00001739	chr1	33846489	33847559	-	38.466	39.3992
RNn_00001740	chr1	33851546	33872550	+	0	0
RNn_00001741	chr1	33858371	33861372	-	8.71293	10.6521
RNn_00001742	chr1	33867172	33885713	-	49.4066	45.89
RNn_00001743	chr1	33894130	33913619	-	11.4585	12.3179
RNn_00001744	chr1	33914719	33915894	-	0	0
RNn_00001746	chr1	33945694	33948123	+	3.44653	2.98109
RNn_00001747	chr1	33963686	33966337	-	319.572	325.864
RNn_00001749	chr1	34012963	34029527	-	75.9825	76.6275
RNn_00001750	chr1	34038250	34067299	-	7.00583	6.92619
RNn_00001751	chr1	34083424	34091422	+	48.0885	43.9482
RNn_00001752	chr1	34093300	34095085	-	169.695	192.589
RNn_00001753	chr1	34104883	34105326	-	0	0
RNn_00001757	chr1	34125572	34125922	-	22.4052	21.4828
RNn_00001758	chr1	34127584	34144659	+	31.0097	28.8504
RNn_00001762	chr1	34185461	34185776	+	0	0
RNn_00001763	chr1	34193079	34219381	-	10.8431	11.5233
RNn_00001764	chr1	34240270	34242820	-	0	0
RNn_00001765	chr1	34248794	34260032	-	8.02775	8.32632
RNn_00001766	chr1	34260893	34261769	-	0.122533	0.141363
RNn_00001767	chr1	34273747	34275118	-	0	0
RNn_00001768	chr1	34285622	34286166	+	12.7455	12.9033
RNn_00001769	chr1	34298753	34299310	-	808.139	742.81
RNn_00001770	chr1	34312005	34314614	-	0	0
RNn_00001771	chr1	34338103	34340079	-	39.5718	38.5418
RNn_00001772	chr1	34344468	34344803	-	0	0
RNn_00001773	chr1	34349389	34422595	+	0.071095	0.046372
RNn_00001774	chr1	34425629	34430194	-	37.5114	40.2049
RNn_00001775	chr1	34431871	34432029	+	0	0
RNn_00001776	chr1	34439110	34467874	+	40.776	41.8034
RNn_00001777	chr1	34447144	34447516	+	0	0.14292
RNn_00001779	chr1	34484304	34486786	-	0.379555	0.327064
RNn_00001780	chr1	34499593	34501817	+	14.689	14.6328
RNn_00001783	chr1	34542327	34558012	-	61.6436	58.0039
RNn_00001784	chr1	34565534	34566935	+	21.158	19.0979
RNn_00001785	chr1	34595519	34669647	+	24.6341	24.8921
RNn_00001786	chr1	34681810	34707087	+	42.6513	46.9197
RNn_00001787	chr1	34712560	34713883	+	6.27266	3.95052
RNn_00001788	chr1	34744075	34746763	-	8.274	8.65012
RNn_00001789	chr1	34750693	34772984	-	8.18957	8.729
RNn_00001790	chr1	34757532	34769211	+	0	0
RNn_00001793	chr1	34786981	34798781	+	18.2493	17.541
RNn_00001795	chr1	34827123	34833248	+	0	0
RNn_00001796	chr1	34852747	34869779	+	11.3399	8.1487
RNn_00001797	chr1	34865140	34866411	-	0	0
RNn_00001798	chr1	34873316	34873859	+	2.48465	2.30595
RNn_00001800	chr1	34878310	34887771	+	5.79471	5.30591
RNn_00001801	chr1	34886817	34887790	-	20.3831	17.2824
RNn_00001802	chr1	34906863	34907283	-	0	0
RNn_00001803	chr1	34921119	34961059	+	6.48592	6.86588
RNn_00001804	chr1	34961061	34961812	-	0.892341	0.537285
RNn_00001805	chr1	34986682	34997668	+	3.90125	4.21093
RNn_00001806	chr1	35034408	35040128	-	3.089	2.09044
RNn_00001807	chr1	35037455	35038113	+	2.67112	2.42614
RNn_00001808	chr1	35037725	35038113	-	2.22449	1.9243
RNn_00001809	chr1	35054109	35054549	+	3.85821	4.50077
RNn_00001810	chr1	35056546	35057038	-	0.051951	0.065382
RNn_00001812	chr1	35114713	35115249	+	0.199447	0.101581
RNn_00001813	chr1	35122863	35123498	+	0	0
RNn_00001814	chr1	35146469	35147134	+	0	0.392773
RNn_00001815	chr1	35168860	35171277	-	0	0
RNn_00001816	chr1	35230401	35231255	-	0.329716	0.26837
RNn_00001817	chr1	35238650	35240662	-	0.56778	0.767529
RNn_00001818	chr1	35257711	35267161	-	12.1005	12.8225
RNn_00001819	chr1	35272211	35272676	-	0	0
RNn_00001820	chr1	35340940	35341557	+	23.5282	27.11
RNn_00001821	chr1	35346029	35347453	+	3.99178	6.01474
RNn_00001822	chr1	35352530	35354388	-	40.5099	47.7467
RNn_00001823	chr1	35353206	35354215	+	0	0
RNn_00001824	chr1	35366722	35367195	+	0	0
RNn_00001827	chr1	35388786	35428255	-	9.37547	8.36479
RNn_00001831	chr1	35456759	35464201	-	4.4747	5.16076
RNn_00001832	chr1	35485763	35504375	+	64.6019	73.4438
RNn_00001833	chr1	35504916	35519188	-	3.26849	3.85819
RNn_00001834	chr1	35522403	35522798	+	0	0
RNn_00001835	chr1	35558456	35561284	+	3.07044	3.93953
RNn_00001836	chr1	35567866	35568040	+	0.429299	0
RNn_00001837	chr1	35584434	35584934	-	2.45774	3.37858
RNn_00001838	chr1	35592160	35592441	-	0	0
RNn_00001839	chr1	35594950	35595970	+	0	0
RNn_00001840	chr1	35601885	35602342	+	0	0
RNn_00001841	chr1	35627414	35627811	+	0	0
RNn_00001844	chr1	35667968	35668730	-	13.5859	7.45373
RNn_00001845	chr1	35677867	35686061	-	18.7704	17.3374
RNn_00001846	chr1	35688746	35690155	-	3.10596	3.38982
RNn_00001847	chr1	35694750	35695149	+	0.713139	0.802318
RNn_00001848	chr1	35694838	35695411	-	1.88334	3.57569
RNn_00001849	chr1	35700121	35710373	+	1.24689	0.637892
RNn_00001850	chr1	35724384	35726518	+	23.0178	21.6622
RNn_00001851	chr1	35739636	35747281	+	169.132	174.363
RNn_00001852	chr1	35775318	35793257	+	8.92195	9.13274
RNn_00001854	chr1	35812022	35813069	-	0.179444	0.218454
RNn_00001855	chr1	35822180	35822609	+	11.09	12.0183
RNn_00001857	chr1	35875571	35890722	+	21.5221	21.8757
RNn_00001858	chr1	35896598	35898891	+	4.26106	2.61476
RNn_00001859	chr1	35916575	35946534	-	1.48305	1.35748
RNn_00001860	chr1	35956663	36049544	+	5.81602	4.86568
RNn_00001865	chr1	36052637	36055273	-	37.504	36.8747
RNn_00001868	chr1	36101366	36101935	-	0.623716	1.10925
RNn_00001869	chr1	36118211	36118777	-	0.01074	0.171276
RNn_00001870	chr1	36123389	36124511	-	19.1071	14.5148
RNn_00001871	chr1	36152495	36152922	-	0	0
RNn_00001872	chr1	36156467	36161055	+	1.03991	0.917538
RNn_00001874	chr1	36209308	36210619	-	0	0
RNn_00001875	chr1	36230295	36230603	-	0	0
RNn_00001877	chr1	36239420	36240634	-	3.56318	3.36518
RNn_00001878	chr1	36245157	36246698	+	0	0
RNn_00001880	chr1	36310416	36312713	+	17.2797	20.8087
RNn_00001881	chr1	36320980	36323167	+	0	0
RNn_00001882	chr1	36363463	36374522	+	22.8129	24.11
RNn_00001884	chr1	36376513	36376950	-	7.39426	9.14119
RNn_00001885	chr1	36384610	36385525	+	0.071898	0.23824
RNn_00001886	chr1	36387338	36390364	-	367.467	430.796
RNn_00001887	chr1	36391058	36393100	-	1.80137	2.66761
RNn_00001888	chr1	36395505	36402011	-	0	0.020438
RNn_00001889	chr1	36428530	36431832	+	83.2637	83.7505
RNn_00001890	chr1	36433317	36442370	-	5.94549	5.53984
RNn_00001891	chr1	36447548	36447916	+	0	0
RNn_00001892	chr1	36502506	36526617	+	9.69528	8.53808
RNn_00001893	chr1	36531953	36543590	-	55.5676	59.4662
RNn_00001894	chr1	36552241	36552812	+	0	0
RNn_00001895	chr1	36586923	36588858	+	0	0
RNn_00001897	chr1	36594536	36601624	+	6.09454	5.73232
RNn_00001898	chr1	36609578	36610172	+	0	0
RNn_00001899	chr1	36623818	36626230	+	19.2984	18.5633
RNn_00001900	chr1	36637164	36640169	+	1.15219	1.27033
RNn_00001901	chr1	36637736	36653509	-	4.60099	4.47788
RNn_00001902	chr1	36669104	36669589	+	0	0
RNn_00001903	chr1	36670866	36671694	+	0	0
RNn_00001904	chr1	36705548	36706744	+	0	0.032452
RNn_00001905	chr1	36727170	36736325	+	203.226	194.681
RNn_00001906	chr1	36748012	36748281	-	2.98172	1.78233
RNn_00001907	chr1	36757533	36758552	+	0.247934	0
RNn_00001910	chr1	36824406	36825033	-	0	0.106756
RNn_00001912	chr1	36842786	36843716	-	0	0
RNn_00001913	chr1	36848266	36865889	+	4.82385	5.08254
RNn_00001914	chr1	36869103	36871038	-	4.57386	4.37889
RNn_00001915	chr1	36878309	36907668	-	3.38087	3.04066
RNn_00001916	chr1	36925896	36926453	+	0.160486	0.110718
RNn_00001918	chr1	36933228	36933605	-	272.023	250.306
RNn_00001919	chr1	36934380	36935943	-	0.567552	0.607332
RNn_00001920	chr1	36945785	36946045	-	0	0
RNn_00001921	chr1	36990467	36995841	-	3.02074	2.66709
RNn_00001922	chr1	36996538	36996881	-	0	0
RNn_00001923	chr1	37022274	37023222	+	0.984897	0.62679
RNn_00001924	chr1	37029871	37032901	+	0.182226	0.144908
RNn_00001925	chr1	37035881	37040019	-	0.012982	0.014976
RNn_00001926	chr1	37036164	37036322	+	0	0
RNn_00001928	chr1	37069439	37077285	-	18.3773	17.9482
RNn_00001929	chr1	37097269	37109550	+	16.9951	15.6366
RNn_00001930	chr1	37138667	37140770	-	15.5542	17.5452
RNn_00001931	chr1	37184649	37186349	-	0	0
RNn_00001932	chr1	37224096	37228128	+	15.7015	15.3546
RNn_00001933	chr1	37248276	37248917	-	0	0
RNn_00001934	chr1	37255773	37256174	+	0	0
RNn_00001935	chr1	37287326	37290472	+	0.904466	1.08857
RNn_00001936	chr1	37297749	37303472	+	1.44739	0.961648
RNn_00001937	chr1	37311034	37312813	-	0	0
RNn_00001938	chr1	37313970	37320367	+	0.983379	1.13773
RNn_00001939	chr1	37327664	37328841	-	0.091224	0
RNn_00001940	chr1	37328549	37330515	+	2.04746	2.17497
RNn_00001941	chr1	37381417	37382767	+	0.059657	0.275296
RNn_00001942	chr1	37407450	37408446	+	0	0
RNn_00001943	chr1	37409102	37409854	+	0	0
RNn_00001944	chr1	37413501	37421644	+	11.6631	12.9735
RNn_00001945	chr1	37439701	37441559	-	0.40431	0.590185
RNn_00001946	chr1	37463402	37464454	+	0	0
RNn_00001947	chr1	37466362	37467734	-	9.76544	10.0665
RNn_00001949	chr1	37531776	37534191	+	31.4351	26.779
RNn_00001950	chr1	37537955	37568935	-	0	0
RNn_00001951	chr1	37538081	37539334	-	0	0
RNn_00001952	chr1	37585861	37588209	-	43.7334	45.7005
RNn_00001953	chr1	37610030	37612244	-	0.078651	0.050274
RNn_00001954	chr1	37617549	37621024	+	2.14268	2.14987
RNn_00001955	chr1	37620966	37647777	-	18.6539	19.4152
RNn_00001956	chr1	37641772	37642492	+	0.148229	0
RNn_00001957	chr1	37672257	37672588	+	0	0
RNn_00001958	chr1	37676307	37676940	-	2.22572	3.57791
RNn_00001959	chr1	37691620	37692330	+	0.399264	0.337691
RNn_00001960	chr1	37695058	37697904	+	8.20624	8.96296
RNn_00001962	chr1	37714781	37714855	+	0	0
RNn_00001963	chr1	37727219	37727293	+	0	0
RNn_00001964	chr1	37739656	37739730	+	0	0
RNn_00001965	chr1	37752091	37752165	+	0	0
RNn_00001966	chr1	37764529	37764603	+	0	0
RNn_00001967	chr1	37789124	37832622	+	109.32	119.1
RNn_00001969	chr1	37835171	37835608	-	30.0258	33.0321
RNn_00001971	chr1	37842999	37843517	+	0	0
RNn_00001972	chr1	37846451	37847536	-	28.9864	30.3219
RNn_00001973	chr1	37850036	37850755	-	0.625863	0.638815
RNn_00001974	chr1	37862281	37862598	+	0	0
RNn_00001975	chr1	37894233	37894943	+	0	0
RNn_00001976	chr1	37901689	37905882	+	0	0
RNn_00001977	chr1	37914795	37916876	-	5.1772	5.50985
RNn_00001978	chr1	37947264	37991334	+	11.487	10.9259
RNn_00001979	chr1	37995122	37996093	-	45.1454	46.4415
RNn_00001980	chr1	38080632	38084556	+	0	0
RNn_00001981	chr1	38104234	38105855	-	1.02735	0.719076
RNn_00001983	chr1	38113547	38113911	-	0.196586	0.089448
RNn_00001984	chr1	38120619	38151532	-	3.07586	3.57778
RNn_00001985	chr1	38172107	38178450	-	4.62901	4.36578
RNn_00001987	chr1	38201525	38232380	+	36.4665	37.0445
RNn_00001988	chr1	38226056	38226427	-	0.355316	0.496011
RNn_00001989	chr1	38232615	38233010	-	2.46627	3.17659
RNn_00001990	chr1	38242429	38266725	+	28.744	26.0455
RNn_00001991	chr1	38268162	38269655	+	1.01211	0.795636
RNn_00001992	chr1	38268162	38268888	-	0	0
RNn_00001994	chr1	38283844	38285476	+	145.946	108.029
RNn_00001995	chr1	38289917	38306575	-	16.5006	16.1567
RNn_00001996	chr1	38314183	38326909	-	12.9719	10.1824
RNn_00001998	chr1	38365977	38386335	+	42.356	23.1988
RNn_00001999	chr1	38388559	38390150	+	0.869941	1.11463
RNn_00002000	chr1	38434049	38447488	+	6.80929	4.84478
RNn_00002001	chr1	38451464	38453190	-	0.397427	0.38633
RNn_00002002	chr1	38456645	38456953	-	0.162293	0
RNn_00002003	chr1	38466616	38471766	+	0.531946	0.488468
RNn_00002004	chr1	38475513	38479043	+	0.072219	0
RNn_00002005	chr1	38483297	38488301	-	40.9132	38.3952
RNn_00002006	chr1	38510987	38530402	-	12.49	11.3384
RNn_00002007	chr1	38572950	38574293	+	0.181234	0.371433
RNn_00002008	chr1	38621641	38648072	+	60.341	54.6485
RNn_00002009	chr1	38650354	38652726	+	0.869424	0.429445
RNn_00002010	chr1	38675936	38694458	+	11.8713	12.5738
RNn_00002012	chr1	38699241	38704571	-	0.035713	0.075991
RNn_00002013	chr1	38745500	38782202	-	24.1763	24.2116
RNn_00002015	chr1	38832628	38847464	+	54.3406	55.9241
RNn_00002016	chr1	38848638	38860281	-	40.1588	43.0283
RNn_00002018	chr1	39046892	39048992	-	0	0
RNn_00002019	chr1	39050377	39051501	+	0	0
RNn_00002020	chr1	39070671	39073797	+	4.69314	4.27714
RNn_00002021	chr1	39093651	39094821	+	0	0.025762
RNn_00002022	chr1	39119571	39120307	+	2.26803	1.99372
RNn_00002023	chr1	39133840	39146765	+	14.7489	12.7497
RNn_00002024	chr1	39150317	39153429	-	0	0
RNn_00002026	chr1	39200482	39224105	-	15.391	14.7438
RNn_00002027	chr1	39224192	39240651	-	23.458	23.3678
RNn_00002028	chr1	39225494	39232769	+	11.4794	12.6238
RNn_00002030	chr1	39253692	39266460	+	24.846	22.0143
RNn_00002031	chr1	39267494	39267820	-	0	0
RNn_00002032	chr1	39275256	39275837	+	0	0
RNn_00002033	chr1	39295603	39296636	-	0	0
RNn_00002035	chr1	39333088	39343068	+	27.5084	28.1278
RNn_00002036	chr1	39355647	39355928	-	0.571603	0.348038
RNn_00002037	chr1	39362254	39364375	+	0.375284	0.424119
RNn_00002038	chr1	39367734	39369612	+	2.34053	2.5098
RNn_00002039	chr1	39390863	39427611	+	6.81798	7.61373
RNn_00002041	chr1	39437782	39447614	-	12.1146	15.0048
RNn_00002042	chr1	39449715	39450032	-	0	0
RNn_00002045	chr1	39471621	39472874	-	4.90698	4.46349
RNn_00002047	chr1	39529984	39561825	+	34.0254	30.2127
RNn_00002048	chr1	39532867	39533752	+	0	0
RNn_00002049	chr1	39563086	39565557	+	13.8837	19.0325
RNn_00002050	chr1	39578801	39580513	-	26.2331	24.775
RNn_00002051	chr1	39593235	39602727	-	90.609	116.359
RNn_00002052	chr1	39608282	39614862	-	0	0
RNn_00002054	chr1	39620313	39620765	-	0.215081	1.35789
RNn_00002056	chr1	39635134	39635253	-	0	0
RNn_00002057	chr1	39635721	39635928	+	0	0
RNn_00002058	chr1	39639713	39643753	-	0	0
RNn_00002059	chr1	39660913	39662968	-	0.084615	0
RNn_00002060	chr1	39665809	39674880	-	27.095	23.1463
RNn_00002061	chr1	39764910	39790901	-	4.02199	3.15148
RNn_00002063	chr1	39753525	39755078	-	0	0
RNn_00002065	chr1	39796027	39797845	-	0.262176	0.24698
RNn_00002066	chr1	39807868	39809968	-	0.098746	0.030461
RNn_00002067	chr1	39811909	39816417	-	0	0.344274
RNn_00002068	chr1	39838824	39861849	-	5.6162	5.22791
RNn_00002069	chr1	39860237	39861011	-	0.044833	0
RNn_00002070	chr1	39888789	39902816	+	2.92162	2.22331
RNn_00002071	chr1	39906257	39906699	+	0	0
RNn_00002072	chr1	39911271	39924114	-	11.9733	10.0689
RNn_00002073	chr1	39921016	39976317	+	0	0.179544
RNn_00002074	chr1	39942613	39956648	+	5.15734	3.73772
RNn_00002075	chr1	39960073	39960515	+	0	0
RNn_00002076	chr1	39965082	39977929	-	6.70605	8.15251
RNn_00002077	chr1	39984829	39987206	-	31.0588	34.4419
RNn_00002078	chr1	40011584	40035725	-	5.78354	6.79819
RNn_00002079	chr1	40046020	40066357	+	56.1755	55.4082
RNn_00002080	chr1	40070441	40071073	+	1.90002	1.11355
RNn_00002081	chr1	40071229	40082314	-	154.682	146.164
RNn_00002083	chr1	40120393	40122101	+	90.1906	96.0798
RNn_00002084	chr1	40138135	40146827	-	23.6281	18.6441
RNn_00002086	chr1	40161763	40163763	+	8.61713	8.26014
RNn_00002087	chr1	40170121	40171758	-	46.6218	51.3604
RNn_00002088	chr1	40180589	40181886	+	0.491772	0.929493
RNn_00002089	chr1	40185098	40218704	-	18.3952	16.5697
RNn_00002090	chr1	40199216	40200182	-	0	0
RNn_00002091	chr1	40241944	40255684	-	74.168	73.843
RNn_00002093	chr1	40308997	40310285	+	0.078819	0
RNn_00002095	chr1	40311721	40312107	+	0	0
RNn_00002096	chr1	40312418	40312601	+	0	0
RNn_00002098	chr1	40316040	40316476	-	0	0
RNn_00002099	chr1	40318859	40319140	+	0	0
RNn_00002101	chr1	40341487	40373707	+	35.7562	39.2421
RNn_00002102	chr1	40382858	40385041	-	8.11774	6.90765
RNn_00002103	chr1	40392779	40393294	-	91.9138	81.6296
RNn_00002104	chr1	40403621	40403943	-	0	0
RNn_00002105	chr1	40427577	40430276	+	5.76712	5.17578
RNn_00002106	chr1	40431975	40434129	-	85.3628	87.3353
RNn_00002107	chr1	40454230	40458218	-	0.092586	0
RNn_00002108	chr1	40482029	40483065	-	1.04858	0.821848
RNn_00002109	chr1	40485082	40492571	+	8.91981	7.93727
RNn_00002110	chr1	40493554	40494003	+	166.374	195.693
RNn_00002111	chr1	40494572	40495027	-	0.890012	0.102859
RNn_00002112	chr1	40513953	40530425	+	5.73166	5.84141
RNn_00002113	chr1	40532308	40533536	+	0.433979	0.466161
RNn_00002114	chr1	40566626	40567290	+	0	0
RNn_00002115	chr1	40571962	40579863	+	1.0322	0.979926
RNn_00002116	chr1	40600873	40612632	+	12.7567	13.176
RNn_00002117	chr1	40621203	40669041	+	63.3068	59.3649
RNn_00002118	chr1	40671273	40673567	-	1.62846	2.23569
RNn_00002119	chr1	40699054	40701702	+	0	0
RNn_00002120	chr1	40707740	40710496	+	22.1902	21.2026
RNn_00002123	chr1	40739471	40740460	-	35.9019	33.0446
RNn_00002124	chr1	40743894	40747032	-	1.33525	1.00923
RNn_00002125	chr1	40792914	40806925	+	13.4932	11.7084
RNn_00002126	chr1	40808469	40896318	-	11.2689	10.9655
RNn_00002129	chr1	40888628	40889692	-	0	0.014551
RNn_00002130	chr1	40922521	40923798	+	9.11585	12.3323
RNn_00002131	chr1	40941229	40942286	+	0	0
RNn_00002132	chr1	40942826	40945071	-	2.46857	1.92579
RNn_00002133	chr1	40942983	40945032	+	0	0
RNn_00002134	chr1	40956452	40959219	+	0	0
RNn_00002135	chr1	40982244	40982843	-	0	0
RNn_00002136	chr1	40986545	40989282	-	0	0
RNn_00002138	chr1	41019833	41022405	+	0	0
RNn_00002139	chr1	41031648	41046340	+	10.2501	10.3589
RNn_00002141	chr1	41066823	41067383	+	0	0
RNn_00002142	chr1	41068499	41069913	-	2.59781	1.59411
RNn_00002144	chr1	41090486	41092705	-	0.29111	0.447794
RNn_00002145	chr1	41098363	41098739	+	0	0
RNn_00002146	chr1	41100514	41100678	+	0.156307	0
RNn_00002147	chr1	41104713	41105109	-	0	0
RNn_00002149	chr1	41130889	41275502	+	1.42756	1.35588
RNn_00002150	chr1	41278383	41279610	-	0.087509	0.050478
RNn_00002151	chr1	41281115	41281422	+	1.87947	1.24812
RNn_00002152	chr1	41281539	41319274	-	10.4816	11.8819
RNn_00002154	chr1	41356069	41357534	+	10.3196	8.23796
RNn_00002155	chr1	41365730	41373584	+	0.169319	0.133415
RNn_00002157	chr1	41395461	41395748	-	0	0
RNn_00002158	chr1	41395924	41396493	-	0	0
RNn_00002159	chr1	41396685	41397272	-	0	0
RNn_00002160	chr1	41410149	41416589	-	0	0
RNn_00002161	chr1	41422393	41440772	+	0.002998	0.070601
RNn_00002162	chr1	41448118	41450145	-	3.99968	4.86414
RNn_00002163	chr1	41452460	41456522	-	8.74678	8.73075
RNn_00002164	chr1	41482307	41552504	-	19.8714	17.2547
RNn_00002166	chr1	41625887	41630604	+	0.952674	0.860718
RNn_00002167	chr1	41630606	41631581	-	0.548868	0.412191
RNn_00002169	chr1	41664679	41666339	+	5.60539	3.45739
RNn_00002170	chr1	41675655	41678298	-	111.335	94.8166
RNn_00002171	chr1	41703880	41707405	+	0	0
RNn_00002172	chr1	41723551	41724134	-	0	0
RNn_00002173	chr1	41730356	41739611	-	1.40613	0.799944
RNn_00002174	chr1	41747959	41775250	+	8.39514	6.98323
RNn_00002175	chr1	41798372	41803231	-	0	0
RNn_00002176	chr1	41829438	41839538	-	0	0
RNn_00002178	chr1	41874465	41880858	-	4.53144	4.34888
RNn_00002179	chr1	41902543	41903153	-	0	0
RNn_00002180	chr1	41916734	41917607	-	0	0
RNn_00002181	chr1	41918355	41920557	-	0	0
RNn_00002182	chr1	41955457	42010869	+	7.24628	7.5813
RNn_00002183	chr1	42021019	42024142	+	0.044351	0
RNn_00002184	chr1	42044867	42045526	+	0.379914	0
RNn_00002185	chr1	42047619	42064094	-	18.9793	20.5553
RNn_00002186	chr1	42075611	42084093	+	5.41763	5.02165
RNn_00002187	chr1	42083847	42085718	-	2.27381	2.03421
RNn_00002190	chr1	42132818	42144583	-	9.87853	8.33979
RNn_00002191	chr1	42146380	42146926	+	0	0
RNn_00002192	chr1	42156922	42197634	+	40.1905	40.124
RNn_00002194	chr1	42233268	42236662	+	1.94484	1.69585
RNn_00002195	chr1	42260515	42355596	-	0	0
RNn_00002196	chr1	42264647	42265194	-	466.766	420.761
RNn_00002197	chr1	42277463	42281731	+	0	0
RNn_00002198	chr1	42313248	42314651	+	0.020538	0
RNn_00002199	chr1	42331164	42333065	+	24.7976	27.412
RNn_00002200	chr1	42347102	42386654	+	3.93239	4.26204
RNn_00002203	chr1	42390881	42397667	-	0.01021	0.092126
RNn_00002204	chr1	42401647	42405581	-	3.21348	3.14659
RNn_00002205	chr1	42409147	42410891	+	1.15251	0.754624
RNn_00002207	chr1	42416202	42419394	-	0.807027	0.655272
RNn_00002208	chr1	42420186	42421965	+	1.49158	1.22094
RNn_00002209	chr1	42432051	42437866	+	118.112	133.072
RNn_00002211	chr1	42507571	42521556	+	137.112	140.872
RNn_00002214	chr1	42525403	42526749	+	4.90304	4.30798
RNn_00002215	chr1	42534807	42535369	+	0	0
RNn_00002216	chr1	42550867	42560034	+	1.55509	1.76628
RNn_00002218	chr1	42553391	42553652	+	0.927403	1.03371
RNn_00002219	chr1	42560361	42563481	-	0.02707	0
RNn_00002220	chr1	42574140	42575910	-	33.5725	35.8884
RNn_00002221	chr1	42594211	42594710	-	0	0
RNn_00002222	chr1	42605493	42606728	-	0.494586	0.217221
RNn_00002223	chr1	42619614	42622399	+	25.8974	28.1177
RNn_00002224	chr1	42632897	42636919	-	0	0
RNn_00002227	chr1	42680401	42681558	+	0.269392	0.087655
RNn_00002228	chr1	42695345	42696353	-	0	0
RNn_00002229	chr1	42701722	42702810	+	0	0
RNn_00002231	chr1	42752265	42756276	-	0.237537	0
RNn_00002232	chr1	42774493	42775447	-	0	0
RNn_00002235	chr1	42819944	42822587	-	0	0
RNn_00002236	chr1	42822593	42823625	+	0	0
RNn_00002237	chr1	42857668	42876398	+	19.6096	19.2554
RNn_00002238	chr1	42881812	42887939	-	6.3429	7.01575
RNn_00002239	chr1	42895569	42904512	+	0.267785	0.552217
RNn_00002240	chr1	42919468	42921108	+	0.644632	0.855971
RNn_00002241	chr1	42922571	42925120	+	0.751477	1.3366
RNn_00002242	chr1	42953860	42956255	-	112.17	132.574
RNn_00002243	chr1	42963649	42981110	+	43.8224	42.3867
RNn_00002244	chr1	42986082	42987319	+	0.986492	1.20005
RNn_00002245	chr1	42986392	42986728	-	0	0
RNn_00002246	chr1	42987984	42989320	+	4.85867	3.89017
RNn_00002248	chr1	43005838	43006382	-	0	0
RNn_00002251	chr1	43036442	43041630	+	4.34343	4.71673
RNn_00002252	chr1	43051315	43054475	-	6.20427	5.66822
RNn_00002255	chr1	43075309	43075696	+	0	0
RNn_00002256	chr1	43079234	43088610	+	14.041	13.2361
RNn_00002257	chr1	43091338	43117424	-	16.3875	14.8443
RNn_00002258	chr1	43203812	43203937	-	0	0
RNn_00002259	chr1	43204071	43204193	-	0	0
RNn_00002261	chr1	43212629	43223233	+	193.354	182.463
RNn_00002262	chr1	43224047	43226176	-	0.105873	0.030536
RNn_00002263	chr1	43239590	43239897	-	0	0
RNn_00002264	chr1	43243283	43262993	-	28.5908	33.5431
RNn_00002266	chr1	43263995	43266319	-	0.09244	0
RNn_00002267	chr1	43289252	43289539	-	0	0
RNn_00002268	chr1	43297138	43297987	-	0	0
RNn_00002269	chr1	43324554	43326846	-	6.0994	11.4873
RNn_00002270	chr1	43340082	43341131	+	0.255178	0.406952
RNn_00002271	chr1	43373674	43374112	-	0	0
RNn_00002273	chr1	43384815	43389384	+	33.457	34.6427
RNn_00002274	chr1	43392970	43393716	+	0.071929	0.035959
RNn_00002275	chr1	43396821	43397901	+	0	0.057343
RNn_00002276	chr1	43403664	43406723	-	2.88144	2.81644
RNn_00002277	chr1	43410867	43411182	+	0	0
RNn_00002279	chr1	43414747	43422411	+	25.1727	21.5467
RNn_00002280	chr1	43425652	43525238	-	1.98242	1.93207
RNn_00002281	chr1	43490614	43491318	-	0.249727	0.04279
RNn_00002282	chr1	43532763	43547684	-	27.8654	36.8301
RNn_00002283	chr1	43579167	43579601	-	20.705	21.727
RNn_00002284	chr1	43596782	43598071	-	3.7474	3.99426
RNn_00002285	chr1	43611413	43613674	-	2.57393	2.68518
RNn_00002286	chr1	43614796	43628656	+	15.2211	16.6506
RNn_00002287	chr1	43628653	43629927	-	3.41653	5.35039
RNn_00002288	chr1	43630293	43633966	-	935.913	1081.11
RNn_00002289	chr1	43639775	43640561	-	0	0.172279
RNn_00002290	chr1	43649050	43649825	-	0	0
RNn_00002293	chr1	43707772	43710368	-	11.8043	9.72738
RNn_00002294	chr1	43757398	43762813	-	14.9827	16.4633
RNn_00002295	chr1	43782630	43788130	+	14.7232	15.3048
RNn_00002296	chr1	43790599	43804934	-	10.9307	10.9962
RNn_00002297	chr1	43837850	43841658	+	2.29379	1.42276
RNn_00002299	chr1	43861808	43866548	+	20.2534	20.0425
RNn_00002300	chr1	43876954	43880371	-	7.11968	7.33007
RNn_00002301	chr1	43885274	43887006	+	2.26053	1.48023
RNn_00002302	chr1	43904054	43904804	-	0	0
RNn_00002303	chr1	43912352	43914538	-	5.10452	4.88673
RNn_00002304	chr1	43949568	43949899	+	0	0
RNn_00002305	chr1	43953339	43971694	+	19.8003	20.4015
RNn_00002307	chr1	44006850	44047683	-	0.202929	0.135847
RNn_00002311	chr1	44062741	44063280	-	0	0
RNn_00002312	chr1	44070058	44071020	-	5.21349	3.01719
RNn_00002313	chr1	44097197	44101580	-	8.16578	8.91465
RNn_00002316	chr1	44120885	44121175	+	0	0
RNn_00002317	chr1	44176149	44177567	+	64.2644	62.5741
RNn_00002318	chr1	44177535	44177955	-	21.6901	22.7498
RNn_00002319	chr1	44180466	44181739	-	0	0.145967
RNn_00002320	chr1	44182968	44183644	-	0	0
RNn_00002322	chr1	44235049	44239932	-	4.98688	5.08141
RNn_00002323	chr1	44271373	44271822	+	0	0
RNn_00002324	chr1	44290892	44291884	-	3.01227	2.43434
RNn_00002325	chr1	44324924	44370601	+	3.73449	4.50788
RNn_00002326	chr1	44382198	44384074	+	11.0924	7.78932
RNn_00002327	chr1	44385421	44390188	-	3.14866	2.50983
RNn_00002328	chr1	44414766	44415556	-	0	0.06232
RNn_00002329	chr1	44418174	44426197	+	3.86755	4.97595
RNn_00002330	chr1	44455577	44456023	+	0.115795	0.042064
RNn_00002331	chr1	44459510	44467638	+	19.5395	21.8173
RNn_00002333	chr1	44524615	44527598	+	0.460544	0.452337
RNn_00002334	chr1	44576152	44578323	-	0	0
RNn_00002335	chr1	44585378	44593999	-	1.79621	2.20917
RNn_00002337	chr1	44618872	44619164	+	0	0
RNn_00002338	chr1	44651745	44653323	+	0	0
RNn_00002339	chr1	44658946	44660538	+	0	0.028985
RNn_00002340	chr1	44681733	44682224	-	0	0
RNn_00002341	chr1	44696924	44698228	+	11.608	7.80962
RNn_00002342	chr1	44701988	44704607	+	0	0
RNn_00002343	chr1	44712532	44714597	+	22.9618	20.8622
RNn_00002344	chr1	44718198	44720274	-	1.16395	1.41703
RNn_00002346	chr1	44763802	44764607	+	14.3373	13.0922
RNn_00002347	chr1	44772501	44807502	-	14.1729	13.7185
RNn_00002348	chr1	44808859	44820405	+	15.3699	13.8254
RNn_00002349	chr1	44847709	44848834	+	7.68804	7.16562
RNn_00002350	chr1	44859169	44866900	+	2.52926	3.01835
RNn_00002351	chr1	44874403	44875148	+	0	0
RNn_00002352	chr1	44876324	44888935	+	26.1154	26.1089
RNn_00002353	chr1	44890517	44890981	-	7.94328	8.86754
RNn_00002354	chr1	44898466	44900060	+	2.99567	3.10041
RNn_00002355	chr1	44905499	44907193	+	46.5573	61.9566
RNn_00002357	chr1	44909310	44909714	+	0	0
RNn_00002359	chr1	44935013	44936632	-	0	0
RNn_00002361	chr1	44943020	44945162	-	0	0
RNn_00002363	chr1	44953481	44953967	-	0	0
RNn_00002364	chr1	45002359	45007503	+	32.3411	29.8386
RNn_00002365	chr1	45013396	45014177	-	0	0
RNn_00002368	chr1	45028285	45032276	+	0.03516	0
RNn_00002369	chr1	45038916	45040256	-	0	0
RNn_00002371	chr1	45053446	45061424	+	9.15875	8.28587
RNn_00002372	chr1	45063780	45075125	-	119.763	116.339
RNn_00002373	chr1	45093296	45094145	+	10.0634	8.92522
RNn_00002374	chr1	45098148	45100678	+	5.13106	4.46917
RNn_00002375	chr1	45122072	45122380	+	0	0
RNn_00002376	chr1	45122675	45123521	+	0.112513	0
RNn_00002378	chr1	45133673	45135888	-	0.176222	0.325663
RNn_00002380	chr1	45178892	45181174	-	0	0
RNn_00002381	chr1	45188745	45202200	-	14.9691	14.5802
RNn_00002383	chr1	45225024	45234230	+	55.4176	52.2799
RNn_00002385	chr1	45247262	45248054	+	0	0
RNn_00002386	chr1	45257885	45260155	+	0.626345	0.695573
RNn_00002387	chr1	45263843	45270445	-	11.8964	11.0944
RNn_00002388	chr1	45297912	45298448	-	0	0
RNn_00002389	chr1	45298697	45299572	-	0	0
RNn_00002391	chr1	45335391	45369014	-	38.8192	42.0999
RNn_00002392	chr1	45393278	45414988	+	7.63016	7.8186
RNn_00002393	chr1	45431263	45431952	+	0	0
RNn_00002394	chr1	45440858	45441271	-	0	0
RNn_00002395	chr1	45453723	45454412	-	0	0
RNn_00002396	chr1	45469018	45473403	+	4.21762	4.48395
RNn_00002398	chr1	45520856	45523981	+	0.579509	0.857166
RNn_00002399	chr1	45525103	45526695	-	1.34879	1.7581
RNn_00002401	chr1	45559261	45589155	+	9.5431	9.02901
RNn_00002402	chr1	45590872	45591593	-	5.66299	4.38145
RNn_00002404	chr1	45601184	45604752	-	1.36686	1.76995
RNn_00002405	chr1	45615817	45622017	+	4.99628	5.80085
RNn_00002406	chr1	45616094	45617655	-	1.01132	1.23102
RNn_00002407	chr1	45623872	45624766	-	42.2425	47.8822
RNn_00002408	chr1	45626333	45636111	-	1.53228	1.92158
RNn_00002409	chr1	45637468	45638914	+	0.436306	0.200199
RNn_00002411	chr1	45690197	45695056	+	8.17729	8.99214
RNn_00002412	chr1	45701838	45709357	+	14.6215	15.0256
RNn_00002413	chr1	45715499	45716344	-	0	0
RNn_00002414	chr1	45727188	45727550	-	0.176107	0.393327
RNn_00002415	chr1	45742940	45743968	-	0	0
RNn_00002416	chr1	45766772	45775906	+	27.3122	25.4702
RNn_00002417	chr1	45775016	45775724	-	0	0
RNn_00002418	chr1	45778659	45779241	+	0	0
RNn_00002419	chr1	45780320	45844543	-	15.7675	18.246
RNn_00002420	chr1	45872960	45938510	+	12.8459	12.5918
RNn_00002421	chr1	45880348	45881074	-	0.779607	0.651478
RNn_00002422	chr1	45894273	45895008	-	0.015574	0
RNn_00002423	chr1	45959084	45960590	-	0.213924	0.123399
RNn_00002424	chr1	45964068	45965629	-	0.110179	0.249585
RNn_00002425	chr1	45981186	46023560	+	17.7165	17.1153
RNn_00002426	chr1	46006310	46007110	+	0	0
RNn_00002427	chr1	46034563	46036634	+	0	0
RNn_00002428	chr1	46037206	46041282	+	0	0
RNn_00002430	chr1	46064021	46066340	-	9.73373	12.408
RNn_00002431	chr1	46070086	46070517	+	0.198588	0.143489
RNn_00002432	chr1	46082552	46082950	-	0	0
RNn_00002433	chr1	46093553	46095970	-	20.129	21.864
RNn_00002434	chr1	46120474	46122378	+	16.8325	15.2683
RNn_00002435	chr1	46136643	46137339	+	2.73947	1.41228
RNn_00002436	chr1	46157524	46166364	+	71.1915	70.4745
RNn_00002437	chr1	46168374	46171611	+	2.89616	1.91427
RNn_00002439	chr1	46207432	46209847	+	6.90151	8.24763
RNn_00002440	chr1	46227114	46229458	+	2.1647	1.85821
RNn_00002441	chr1	46229239	46241701	-	1.92064	1.96627
RNn_00002443	chr1	46267140	46274727	+	0.28069	0.223177
RNn_00002444	chr1	46283397	46315144	+	0	0.0203
RNn_00002445	chr1	46316232	46317765	+	718.012	745.637
RNn_00002446	chr1	46319981	46320644	+	0	0.108914
RNn_00002447	chr1	46329544	46330604	+	0	0
RNn_00002448	chr1	46329548	46332064	-	9.72275	7.77969
RNn_00002449	chr1	46344022	46344329	+	0	0
RNn_00002451	chr1	46390045	46391342	+	1.0163	1.11056
RNn_00002452	chr1	46393607	46395334	+	6.36704	6.02799
RNn_00002453	chr1	46397175	46409266	-	1.52576	1.19505
RNn_00002454	chr1	46430606	46431437	-	0	0
RNn_00002455	chr1	46431726	46432202	-	0	0
RNn_00002456	chr1	46445979	46446675	-	0	0
RNn_00002457	chr1	46465782	46466678	-	12.3563	10.6021
RNn_00002459	chr1	46497126	46498629	-	0.147423	0.082293
RNn_00002460	chr1	46501476	46520593	+	10.1184	10.4511
RNn_00002462	chr1	46522044	46522415	+	0.470545	0.096647
RNn_00002463	chr1	46534756	46536752	-	2.82287	2.87306
RNn_00002464	chr1	46582991	46583168	-	0	0
RNn_00002465	chr1	46584623	46585786	+	0	0
RNn_00002466	chr1	46593642	46759661	-	7.72288	6.05546
RNn_00002467	chr1	46733536	46734179	-	0	0
RNn_00002469	chr1	46782526	46783044	-	0	0
RNn_00002470	chr1	46823669	46886606	+	92.0898	104.333
[truncated: 35,131 more rows]

## Sheet: Sheet4
Table S4. Genomic Loci and gene expression in the Thai lotus genome.
Gene ID	Chr	Start	End	Strand	FPKM_sample1	FPKM_sample2
TNn_00000001	chr1	37851	39426	+	83.2791	38.0764
TNn_00000002	chr1	40598	50537	-	0	0
TNn_00000005	chr1	178791	179322	-	0	0
TNn_00000006	chr1	179540	180047	+	0	0
TNn_00000007	chr1	240649	241698	+	0	0
TNn_00000008	chr1	256698	257237	-	0	0
TNn_00000009	chr1	312279	313042	+	0	0
TNn_00000010	chr1	335589	336014	+	0	0
TNn_00000011	chr1	351473	464007	-	6.83018	8.36695
TNn_00000012	chr1	395700	396777	-	0	0
TNn_00000014	chr1	472387	548166	+	37.5458	27.7767
TNn_00000015	chr1	565361	565651	-	2.05255	2.86255
TNn_00000016	chr1	566357	655065	+	25.6217	26.0455
TNn_00000018	chr1	683156	683525	-	0	0
TNn_00000019	chr1	746401	747663	+	13.3836	10.7181
TNn_00000020	chr1	756949	759255	-	0	0
TNn_00000021	chr1	760305	779940	+	14.1214	13.9782
TNn_00000022	chr1	786545	787174	-	0.278336	0.987365
TNn_00000023	chr1	807704	808946	+	21.1398	14.3377
TNn_00000024	chr1	810041	810906	-	0	0.214688
TNn_00000025	chr1	818292	818919	-	4.55482	8.78804
TNn_00000026	chr1	831167	833446	-	5.00134	3.36038
TNn_00000027	chr1	833876	834848	-	1.79474	1.00059
TNn_00000028	chr1	881937	886726	-	56.027	49.1466
TNn_00000029	chr1	887557	919083	-	39.3119	58.4901
TNn_00000030	chr1	954733	966311	-	0.753363	1.07852
TNn_00000031	chr1	1002441	1004005	-	0.199005	0.622651
TNn_00000032	chr1	1010979	1011410	+	0	0
TNn_00000033	chr1	1011880	1012049	+	0	0
TNn_00000034	chr1	1015523	1054732	-	20.0107	20.8278
TNn_00000036	chr1	1083300	1087751	-	0.068811	0.079006
TNn_00000037	chr1	1090928	1092561	+	0	0
TNn_00000038	chr1	1101940	1102966	+	0	0
TNn_00000039	chr1	1118164	1118481	+	51.4295	37.2362
TNn_00000040	chr1	1122503	1123023	+	0	0
TNn_00000041	chr1	1123994	1124266	+	0.277552	0.818684
TNn_00000042	chr1	1137171	1137467	+	0	0.095849
TNn_00000043	chr1	1159363	1162747	-	31.292	41.1197
TNn_00000044	chr1	1164640	1166218	+	0	0
TNn_00000045	chr1	1165360	1165771	-	0	0
TNn_00000046	chr1	1171654	1174032	+	8.12221	9.36161
TNn_00000047	chr1	1185748	1186495	-	10.0898	9.97658
TNn_00000048	chr1	1197690	1198596	-	0	0
TNn_00000049	chr1	1218711	1223665	+	5.87064	4.14802
TNn_00000050	chr1	1225240	1225814	-	0.37167	0.43791
TNn_00000051	chr1	1229238	1229522	+	0	0
TNn_00000052	chr1	1229924	1234788	+	0	0
TNn_00000053	chr1	1239855	1240514	-	841.116	1037.15
TNn_00000055	chr1	1257269	1257859	-	1.0845	0.387062
TNn_00000056	chr1	1261962	1264107	+	0	0
TNn_00000058	chr1	1293075	1295194	-	5.26557	2.29468
TNn_00000060	chr1	1407125	1408752	+	6.69005	6.56177
TNn_00000061	chr1	1458002	1459392	+	391.191	289.94
TNn_00000064	chr1	1540003	1602837	+	2.07065	237.961
TNn_00000068	chr1	1630577	1631296	-	0	0
TNn_00000070	chr1	1663794	1664320	-	0.082825	0
TNn_00000071	chr1	1673846	1704839	-	10.6628	8.0214
TNn_00000073	chr1	1770125	1771403	-	0.100711	0
TNn_00000075	chr1	1841575	1842006	-	0	0.031771
TNn_00000076	chr1	1844545	1845974	+	1.36323	0.948225
TNn_00000077	chr1	1854071	1854753	+	0.324426	0.428997
TNn_00000078	chr1	1870912	1872413	-	5.41393	5.93379
TNn_00000080	chr1	1945455	1971933	-	1.02209	0.809015
TNn_00000081	chr1	2007209	2007775	+	0	0
TNn_00000082	chr1	2009476	2009859	-	0.147623	0.3967
TNn_00000083	chr1	2019685	2034792	-	21.9298	19.3424
TNn_00000084	chr1	2066202	2067082	+	0	0
TNn_00000085	chr1	2124021	2153962	+	62.5665	52.4488
TNn_00000086	chr1	2156023	2159171	-	1.61697	1.36741
TNn_00000087	chr1	2183711	2187846	-	0.289411	0.255687
TNn_00000088	chr1	2195860	2196450	+	0.905778	0.479383
TNn_00000089	chr1	2196995	2199790	-	0.051186	0.019849
TNn_00000090	chr1	2213718	2213916	-	0.029715	0.221388
TNn_00000091	chr1	2214069	2217664	+	0.640444	0.335196
TNn_00000092	chr1	2213997	2214653	-	0	0.609777
TNn_00000093	chr1	2231387	2233780	+	0	0.049347
TNn_00000094	chr1	2235885	2236524	-	0	0
TNn_00000097	chr1	2299552	2302208	+	58.9653	47.2536
TNn_00000098	chr1	2307153	2309987	-	26.0146	27.1288
TNn_00000101	chr1	2349301	2354053	+	2.14848	1.55677
TNn_00000102	chr1	2356715	2357707	-	9.3057	3.99881
TNn_00000104	chr1	2403943	2405652	-	148.912	145.023
TNn_00000105	chr1	2441785	2445817	+	24.6289	25.3034
TNn_00000111	chr1	2601566	2601775	-	0	0.334435
TNn_00000113	chr1	2691245	2693113	+	0.09099	0
TNn_00000115	chr1	2835310	2835867	-	7.67341	39.6825
TNn_00000116	chr1	2836441	2837171	-	1.15261	0.375519
TNn_00000117	chr1	2845636	2859557	-	5.1124	3.00203
TNn_00000118	chr1	2863979	2864437	-	0	0
TNn_00000119	chr1	2879328	2880594	-	0.538833	0.529472
TNn_00000120	chr1	2885965	2886431	+	0	0
TNn_00000121	chr1	2886718	2887820	+	0	0.377804
TNn_00000123	chr1	2898424	2907601	-	7.80797	8.9519
TNn_00000124	chr1	2912892	2914475	-	4.3611	7.34676
TNn_00000128	chr1	2930999	2935968	-	0	0
TNn_00000129	chr1	2931597	2935595	+	0	0
TNn_00000130	chr1	3013220	3015933	-	6.02328	5.01985
TNn_00000131	chr1	3024007	3024436	-	10.9123	9.70424
TNn_00000133	chr1	3061915	3077833	+	5.34236	5.02481
TNn_00000134	chr1	3062986	3064264	-	0.17699	0.039613
TNn_00000135	chr1	3108109	3108453	-	6.51928	3.6021
TNn_00000136	chr1	3126791	3129148	-	0	0
TNn_00000137	chr1	3157524	3158390	-	0.505628	0.652772
TNn_00000138	chr1	3161024	3164304	+	0.694781	0.34757
TNn_00000139	chr1	3161198	3162387	-	0	0
TNn_00000140	chr1	3162717	3163113	-	0	0
TNn_00000141	chr1	3180487	3181737	-	0	0
TNn_00000142	chr1	3180683	3180922	+	0	0
TNn_00000143	chr1	3222503	3223468	-	0.04014	0
TNn_00000145	chr1	3271346	3273396	-	0.433296	0.659352
TNn_00000146	chr1	3315481	3315873	+	0.143761	0
TNn_00000148	chr1	3337675	3337993	-	0.063973	0.103049
TNn_00000151	chr1	3392896	3393288	+	0	0
TNn_00000152	chr1	3406520	3406855	-	24.1465	25.3076
TNn_00000153	chr1	3410770	3412770	+	9.73372	9.1882
TNn_00000154	chr1	3417193	3419354	-	0	0
TNn_00000155	chr1	3421835	3422512	-	0	0
TNn_00000156	chr1	3423783	3423994	-	0	0
TNn_00000157	chr1	3444256	3449956	+	17.8092	17.6998
TNn_00000158	chr1	3460378	3461565	+	0.858736	0.381826
TNn_00000159	chr1	3475147	3476408	-	11.9281	9.15648
TNn_00000160	chr1	3515688	3587325	+	55.0896	49.4808
TNn_00000163	chr1	3591852	3592694	+	12.0471	11.3813
TNn_00000164	chr1	3595083	3596801	-	162.039	190.22
TNn_00000165	chr1	3615456	3620347	-	1.84989	1.39204
TNn_00000167	chr1	3649729	3650369	+	0	0
TNn_00000168	chr1	3679422	3746998	+	1.06399	1.09169
TNn_00000169	chr1	3763291	3764748	+	5.14888	5.59687
TNn_00000170	chr1	3784684	3787519	-	96.3679	77.7568
TNn_00000171	chr1	3788246	3789816	+	50.0509	63.2112
TNn_00000172	chr1	3798314	3801210	+	2.06011	2.25298
TNn_00000174	chr1	3816533	3817579	-	131.141	98.3757
TNn_00000175	chr1	3819642	3821712	+	0	0.121544
TNn_00000176	chr1	3839279	3845552	+	12.5277	11.7824
TNn_00000177	chr1	3845910	3849642	-	1.29104	1.28876
TNn_00000178	chr1	3858036	3864473	-	15.946	17.7997
TNn_00000180	chr1	3881114	3881314	+	0	0
TNn_00000182	chr1	3895099	3897717	+	5.66367	4.48238
TNn_00000183	chr1	3936210	3937252	+	0.193685	0.075017
TNn_00000185	chr1	3962661	3963032	-	15.5148	20.0357
TNn_00000186	chr1	3979357	3979818	-	0	0
TNn_00000187	chr1	3986193	3989391	-	5.09564	5.2851
TNn_00000188	chr1	3987456	3988267	+	10.5592	13.0163
TNn_00000189	chr1	3997333	4003509	+	27.1047	24.5793
TNn_00000192	chr1	4019980	4034407	+	11.7766	13.1019
TNn_00000193	chr1	4036773	4043141	+	35.6259	22.4771
TNn_00000194	chr1	4047108	4047440	+	0	0
TNn_00000195	chr1	4049471	4051909	-	4.35848	5.0559
TNn_00000196	chr1	4068434	4072802	-	1.07784	0.544016
TNn_00000197	chr1	4081770	4085036	-	2.04799	1.72419
TNn_00000198	chr1	4085810	4087583	+	0.782882	0.68562
TNn_00000199	chr1	4099508	4100752	-	0.587512	0.796605
TNn_00000200	chr1	4105564	4105890	-	0	0
TNn_00000201	chr1	4107485	4107790	+	0	0
TNn_00000203	chr1	4138703	4140295	-	0.620179	0.946286
TNn_00000204	chr1	4162741	4163532	+	0.457322	0
TNn_00000205	chr1	4171053	4192197	-	7.07946	5.96568
TNn_00000206	chr1	4204049	4210155	+	5.88174	5.02727
TNn_00000207	chr1	4256970	4258753	+	0.04159	0.124713
TNn_00000208	chr1	4259605	4261806	+	300.715	193.504
TNn_00000210	chr1	4280163	4280458	+	0.453241	0.171737
TNn_00000211	chr1	4301468	4303245	+	1.7732	1.31984
TNn_00000212	chr1	4305337	4307776	-	6.13418	7.40135
TNn_00000213	chr1	4312097	4341054	-	15.3721	7.45659
TNn_00000214	chr1	4341188	4341580	-	0	0
TNn_00000215	chr1	4350888	4353789	-	13.7322	3.28471
TNn_00000216	chr1	4360454	4360846	+	0	0
TNn_00000217	chr1	4364497	4380533	-	37.9626	34.7772
TNn_00000218	chr1	4424088	4426382	+	1.84772	1.85339
TNn_00000219	chr1	4450533	4464282	+	3.04828	3.97069
TNn_00000220	chr1	4455542	4456254	-	0.445675	0.4171
TNn_00000221	chr1	4457703	4458746	-	0.360268	0.176905
TNn_00000224	chr1	4530558	4530824	+	0	0
TNn_00000225	chr1	4553196	4554065	+	2.23186	0.29176
TNn_00000226	chr1	4554883	4555241	+	0	0.464349
TNn_00000227	chr1	4554931	4556258	-	1.57536	1.50018
TNn_00000228	chr1	4579279	4580989	-	5.79182	5.32188
TNn_00000229	chr1	4584727	4585173	-	0	0
TNn_00000230	chr1	4585829	4589699	-	0	0
TNn_00000231	chr1	4590790	4591186	+	0	0
TNn_00000232	chr1	4596002	4598567	+	10.6741	12.3395
TNn_00000233	chr1	4620521	4620838	+	0	0
TNn_00000234	chr1	4624940	4625173	+	0	0
TNn_00000235	chr1	4625213	4625338	-	0	0
TNn_00000236	chr1	4634019	4635302	+	4.33037	4.36022
TNn_00000237	chr1	4638469	4643095	+	4.5246	5.75423
TNn_00000239	chr1	4671117	4671381	-	0	0
TNn_00000240	chr1	4678463	4681069	+	0.773233	0.847365
TNn_00000241	chr1	4698859	4699530	+	0	0
TNn_00000242	chr1	4714996	4721571	-	9.12022	6.49639
TNn_00000243	chr1	4730109	4746976	-	11.3617	8.73133
TNn_00000244	chr1	4747421	4829016	+	7.90867	7.77441
TNn_00000247	chr1	4833819	4834968	-	0	0
TNn_00000248	chr1	4847507	4859228	+	3.33005	3.53172
TNn_00000249	chr1	4865946	4870107	+	9.46361	7.11223
TNn_00000250	chr1	4886485	4904657	+	12.9605	7.16958
TNn_00000251	chr1	4891494	4892843	-	0.272938	0.480727
TNn_00000252	chr1	4908192	4911655	-	16.2106	18.0703
TNn_00000254	chr1	4933681	4934013	-	0	0
TNn_00000255	chr1	4955576	4970069	+	111.253	98.487
TNn_00000256	chr1	4974440	4974772	-	0	0
TNn_00000257	chr1	4984499	4984840	+	0	0
TNn_00000258	chr1	4986369	4987776	-	28.2081	23.6792
TNn_00000259	chr1	5011199	5018590	-	62.0593	52.6598
TNn_00000260	chr1	5042586	5045881	-	21.9055	16.0037
TNn_00000261	chr1	5051936	5053591	+	6.29856	4.52716
TNn_00000262	chr1	5052815	5053057	+	1.08305	0.170842
TNn_00000264	chr1	5056727	5057113	-	2.64003	2.02592
TNn_00000265	chr1	5082098	5084443	+	0	0.043163
TNn_00000267	chr1	5129337	5130858	+	11.9354	11.7366
TNn_00000268	chr1	5141205	5144766	-	107.435	57.2712
TNn_00000269	chr1	5167279	5167699	+	0	0
TNn_00000272	chr1	5255373	5256652	+	0	0
TNn_00000273	chr1	5267898	5268359	-	0	0
TNn_00000274	chr1	5282527	5283927	+	0	0
TNn_00000275	chr1	5334123	5334695	-	35.5335	30.1914
TNn_00000276	chr1	5372383	5375005	+	23.9044	16.9217
TNn_00000277	chr1	5389927	5393347	+	0.295245	0.048138
TNn_00000278	chr1	5390917	5391411	+	0.05726	0.066752
TNn_00000279	chr1	5392435	5392681	-	0	0
TNn_00000281	chr1	5403180	5403614	+	0	0
TNn_00000282	chr1	5410972	5411655	+	0.072931	0.148638
TNn_00000283	chr1	5412653	5412958	+	0.277878	1.03717
TNn_00000284	chr1	5451947	5452534	+	23.2243	23.6399
TNn_00000285	chr1	5462207	5563596	+	21.1061	12.7842
TNn_00000286	chr1	5588898	5597292	+	1.8517	1.46002
TNn_00000287	chr1	5595042	5596510	-	0	0
TNn_00000288	chr1	5598367	5601761	-	11.7257	22.6675
TNn_00000289	chr1	5608675	5620775	-	6.68846	7.56295
TNn_00000290	chr1	5625083	5626735	-	2.83807	2.27653
TNn_00000291	chr1	5663631	5669786	-	2.17635	1.43286
TNn_00000292	chr1	5672432	5675511	+	0.639155	0.68421
TNn_00000293	chr1	5679480	5699877	+	27.6111	17.0509
TNn_00000294	chr1	5703200	5725977	-	53.137	56.7331
TNn_00000295	chr1	5713483	5714845	+	0.105223	0
TNn_00000296	chr1	5785757	5787865	+	8.88024	8.15804
TNn_00000297	chr1	5795651	5801617	+	10.0177	8.66659
TNn_00000298	chr1	5807177	5844834	-	13.3452	10.3074
TNn_00000300	chr1	5863687	5879830	+	28.6424	24.8721
TNn_00000301	chr1	5865617	5866161	-	0	0.046637
TNn_00000303	chr1	5905618	5909278	+	11.222	10.4777
TNn_00000305	chr1	5922933	5925036	-	0.131466	0.805091
TNn_00000306	chr1	5940576	5943913	+	74.8973	57.4937
TNn_00000307	chr1	5946526	5947116	+	3.98728	3.60025
TNn_00000308	chr1	5959954	5964067	-	178.021	75.9109
TNn_00000309	chr1	5972435	5973808	+	0	0
TNn_00000312	chr1	6009635	6011794	+	0	0
TNn_00000313	chr1	6011022	6013809	-	0	0
TNn_00000314	chr1	6018084	6029510	-	0.993717	1.424
TNn_00000315	chr1	6041327	6042109	-	0.047497	0.088666
TNn_00000316	chr1	6047657	6048309	+	0	0
TNn_00000317	chr1	6082567	6086055	+	2.53424	2.2678
TNn_00000319	chr1	6118786	6124472	-	31.4553	48.1006
TNn_00000320	chr1	6138245	6145071	-	14.728	11.0567
TNn_00000321	chr1	6163434	6186020	-	8.72926	7.297
TNn_00000322	chr1	6208718	6212581	-	12.8665	8.31869
TNn_00000323	chr1	6220562	6220849	+	0	0
TNn_00000324	chr1	6229267	6232514	-	0.155201	0.295633
TNn_00000325	chr1	6245262	6246071	-	0	0.523644
TNn_00000326	chr1	6245434	6246093	+	0.078891	0.269132
TNn_00000327	chr1	6272043	6273834	-	9.82879	8.18391
TNn_00000328	chr1	6296163	6296496	-	0	0
TNn_00000329	chr1	6304326	6380664	-	9.96618	13.2508
TNn_00000330	chr1	6381748	6386080	+	1.40363	1.18431
TNn_00000332	chr1	6428934	6429551	-	0	0.921769
TNn_00000334	chr1	6467174	6467494	+	0	0
TNn_00000335	chr1	6504422	6505434	-	0	0
TNn_00000338	chr1	6543520	6562497	+	29.9731	6.68212
TNn_00000339	chr1	6576680	6577758	-	0.446561	0.374071
TNn_00000340	chr1	6579979	6608607	-	9.01477	6.38274
TNn_00000341	chr1	6628814	6629976	+	0	0
TNn_00000342	chr1	6640792	6652272	+	31.1802	30.4316
TNn_00000343	chr1	6679167	6712057	-	0.783518	0.676389
TNn_00000344	chr1	6721477	6722658	+	0.067622	0
TNn_00000345	chr1	6737758	6741077	+	5.08853	4.72356
TNn_00000346	chr1	6748207	6749790	-	0.631864	0.80718
TNn_00000347	chr1	6776858	6778953	-	0.651693	0.822578
TNn_00000348	chr1	6802306	6806296	-	2.04356	2.19644
TNn_00000350	chr1	6856980	6858261	+	5.10273	3.83442
TNn_00000351	chr1	6865464	6865893	-	20.5858	19.1275
TNn_00000352	chr1	6865587	6865871	+	14.0544	10.8517
TNn_00000354	chr1	6956747	6962477	+	70.3332	54.951
TNn_00000355	chr1	6978249	6978740	+	1.50705	0.751146
TNn_00000356	chr1	6983282	6984850	-	4.95571	4.12751
TNn_00000357	chr1	7014803	7024349	-	29.8689	25.4634
TNn_00000359	chr1	7055088	7055435	+	4.12339	5.58201
TNn_00000360	chr1	7056912	7075313	+	10.713	10.9955
TNn_00000361	chr1	7094276	7103804	-	11.747	13.99
TNn_00000363	chr1	7188577	7190391	+	0.031232	0.028008
TNn_00000364	chr1	7219228	7222888	+	11.5047	9.17518
TNn_00000365	chr1	7256246	7258562	+	5.61039	4.45817
TNn_00000366	chr1	7261674	7382291	-	18.0948	17.4658
TNn_00000367	chr1	7332329	7333714	+	0	0
TNn_00000368	chr1	7390902	7394148	+	0	0
TNn_00000369	chr1	7399001	7401893	-	0.2322	0.117039
TNn_00000370	chr1	7424464	7425335	-	0	0
TNn_00000371	chr1	7439917	7440264	+	0	0
TNn_00000374	chr1	7558499	7563955	+	0.722619	1.35857
TNn_00000376	chr1	7586155	7587023	-	0	0
TNn_00000377	chr1	7588093	7588764	-	21.0256	9.01327
TNn_00000378	chr1	7589905	7590805	-	0	0
TNn_00000379	chr1	7598775	7705172	-	0	0
TNn_00000380	chr1	7616124	7617272	-	0	0
TNn_00000381	chr1	7617359	7618209	+	0	0
TNn_00000382	chr1	7629940	7631592	+	0	0.042971
TNn_00000385	chr1	7732315	7732740	-	0	0
TNn_00000389	chr1	7790226	7882530	-	0.02971	0
TNn_00000390	chr1	7827688	7828127	-	0	0
TNn_00000391	chr1	7900755	7901447	-	0.580776	0.891492
TNn_00000392	chr1	7913389	7920608	+	25.9865	34.8736
TNn_00000393	chr1	7927098	7928423	+	0	0
TNn_00000394	chr1	7940749	7941588	+	0	0
TNn_00000395	chr1	7953627	7955778	-	0	0
TNn_00000396	chr1	7968318	7968742	+	0	0
TNn_00000397	chr1	8022004	8023231	+	0	0
TNn_00000398	chr1	8040121	8041828	-	13.4179	19.8094
TNn_00000399	chr1	8084192	8085184	-	0	0
TNn_00000400	chr1	8091773	8115150	+	8.97612	8.38785
TNn_00000401	chr1	8132704	8134467	+	18.2274	18.3125
TNn_00000402	chr1	8166630	8168491	-	15.3816	14.1162
TNn_00000403	chr1	8184095	8184444	-	0	0
TNn_00000404	chr1	8192804	8193236	+	0	0
TNn_00000405	chr1	8199448	8201504	+	71.7864	147.365
TNn_00000406	chr1	8244467	8247007	-	0.885085	0.152789
TNn_00000408	chr1	8271028	8273304	-	0	0
TNn_00000409	chr1	8341934	8342393	-	1.54654	1.69275
TNn_00000411	chr1	8407561	8407885	-	0	0
TNn_00000412	chr1	8437688	8442012	+	12.2709	9.72689
TNn_00000414	chr1	8454927	8455808	+	0	0
TNn_00000415	chr1	8461670	8468006	-	0.643254	1.47253
TNn_00000416	chr1	8487020	8490802	-	38.3159	9.36798
TNn_00000418	chr1	8530392	8585946	+	6.0454	5.54612
TNn_00000421	chr1	8616037	8619235	+	26.9182	23.8924
TNn_00000424	chr1	8670824	8671933	-	7.11942	5.87767
TNn_00000425	chr1	8677691	8677891	-	0	0
TNn_00000426	chr1	8678510	8679377	+	0	0.25488
TNn_00000427	chr1	8688318	8688659	+	8.08868	9.28689
TNn_00000428	chr1	8711868	8713274	+	0	0
TNn_00000429	chr1	8713713	8717968	+	0	0
TNn_00000430	chr1	8729156	8730412	+	7.09008	5.91391
TNn_00000432	chr1	8786622	8786937	-	0	0
TNn_00000433	chr1	8810876	8811976	+	1.09907	2.05645
TNn_00000436	chr1	8979552	8980190	+	12.1633	11.6377
TNn_00000437	chr1	9014021	9014386	-	0	0
TNn_00000438	chr1	9030442	9040444	+	0	0
TNn_00000439	chr1	9064558	9064932	+	2.75272	1.38178
TNn_00000440	chr1	9068143	9097550	-	82.3649	40.1837
TNn_00000441	chr1	9081056	9092896	-	0	0.032993
TNn_00000442	chr1	9146187	9147387	-	52.1331	31.4638
TNn_00000443	chr1	9192394	9193626	+	0	0
TNn_00000445	chr1	9210898	9211113	+	4.85514	5.52586
TNn_00000446	chr1	9218016	9227066	+	15.291	14.0355
TNn_00000447	chr1	9246677	9352467	+	7.5027	6.38378
TNn_00000450	chr1	9352573	9352814	-	0	0
TNn_00000452	chr1	9398864	9403353	+	10.5382	14.0717
TNn_00000453	chr1	9405305	9412463	-	27.5547	26.782
TNn_00000455	chr1	9470516	9472427	+	0.029773	0.066747
TNn_00000458	chr1	9507153	9510096	+	52.005	59.7869
TNn_00000459	chr1	9516653	9517006	+	0	0
TNn_00000460	chr1	9521309	9522519	-	0	0
TNn_00000462	chr1	9531105	9532747	-	0	0
TNn_00000463	chr1	9551779	9555169	+	8.62791	8.99936
TNn_00000464	chr1	9569849	9572041	+	0	0.09787
TNn_00000465	chr1	9573716	9575106	-	2.67245	3.30682
TNn_00000466	chr1	9584637	9585627	+	53.4501	84.0254
TNn_00000467	chr1	9589671	9616566	-	0.793441	1.6323
TNn_00000468	chr1	9606231	9608122	-	0	0
TNn_00000469	chr1	9630128	9630775	-	3.9576	10.1822
TNn_00000470	chr1	9652404	9653116	+	0	0
TNn_00000471	chr1	9669585	9671780	-	0	0
TNn_00000472	chr1	9704421	9705471	-	0	0
TNn_00000473	chr1	9720768	9723535	-	12.3084	10.5467
TNn_00000474	chr1	9751682	9823948	+	5.13498	3.65827
TNn_00000478	chr1	9876767	9877102	-	0	0
TNn_00000479	chr1	9938373	9963215	-	7.21376	6.22366
TNn_00000480	chr1	9960188	9960957	-	0	0
TNn_00000481	chr1	10011344	10011715	-	0	0
TNn_00000482	chr1	10037769	10044946	+	26.8696	36.0516
TNn_00000483	chr1	10052703	10077244	-	1.66697	2.74195
TNn_00000485	chr1	10137934	10147139	-	7.46293	4.48803
TNn_00000486	chr1	10148019	10148414	-	1.28834	0.948219
TNn_00000487	chr1	10151400	10152079	+	0.415283	0.858698
TNn_00000488	chr1	10152816	10153563	+	0.303139	0.61164
TNn_00000489	chr1	10163782	10168741	+	9.55786	6.41237
TNn_00000490	chr1	10169597	10170009	-	0	0.045952
TNn_00000491	chr1	10186791	10192273	-	4.50954	2.95911
TNn_00000492	chr1	10208003	10208641	+	0	0
TNn_00000493	chr1	10221431	10221592	-	0.17496	0
TNn_00000494	chr1	10223683	10224429	+	0.446464	0.336172
TNn_00000495	chr1	10233314	10234853	+	0.859889	0.116592
TNn_00000497	chr1	10246445	10246692	+	0	0
TNn_00000498	chr1	10270915	10271637	-	39.4679	51.3106
TNn_00000499	chr1	10338794	10339957	+	0	0.131016
TNn_00000501	chr1	10367306	10367686	-	10.839	10.7677
TNn_00000502	chr1	10388157	10388347	+	0	0
TNn_00000503	chr1	10392669	10392986	+	0	0
TNn_00000504	chr1	10394729	10395325	+	0	0.125516
TNn_00000505	chr1	10420415	10473234	+	13.9047	11.6422
TNn_00000506	chr1	10475455	10492472	+	43.5666	41.5443
TNn_00000507	chr1	10492423	10492670	-	10.0734	11.7971
TNn_00000508	chr1	10493387	10545423	-	19.0421	23.5903
TNn_00000509	chr1	10568913	10569292	-	0	0
TNn_00000511	chr1	10599654	10600056	-	0	0
TNn_00000512	chr1	10605871	10606246	-	0	0
TNn_00000513	chr1	10616445	10616914	-	0	0.072765
TNn_00000514	chr1	10636969	10639121	-	0.854755	0.855371
TNn_00000515	chr1	10656687	10657120	+	2.01644	1.19049
TNn_00000516	chr1	10657260	10664343	+	12.2508	8.65906
TNn_00000517	chr1	10668718	10668936	+	0	0
TNn_00000519	chr1	10686966	10712757	+	3.01679	1.38512
TNn_00000520	chr1	10733684	10736469	-	24.4219	32.288
TNn_00000521	chr1	10751746	10753340	+	0	0
TNn_00000522	chr1	10751870	10754106	-	0	0
TNn_00000524	chr1	10756635	10759127	-	0	0
TNn_00000526	chr1	10759964	10760277	-	0	0
TNn_00000527	chr1	10760573	10760878	-	0.007163	0
TNn_00000528	chr1	10761122	10761652	-	0.436392	0.17551
TNn_00000529	chr1	10762054	10762597	-	0.096678	0.023361
TNn_00000532	chr1	10764034	10764313	+	0	0
TNn_00000533	chr1	10765252	10765709	-	0.005226	0
TNn_00000534	chr1	10766065	10766728	-	0	0
TNn_00000535	chr1	10782762	10783033	-	0.208408	0.091576
TNn_00000536	chr1	10783465	10783699	+	0.041812	0.047589
TNn_00000537	chr1	10803550	10806441	-	5.38378	2.91754
TNn_00000538	chr1	10820951	10821901	+	32.7019	34.7415
TNn_00000539	chr1	10862883	10863656	-	0	0
TNn_00000540	chr1	10900724	10904402	-	2.7985	2.15232
TNn_00000541	chr1	10908833	10909213	+	0	0
TNn_00000542	chr1	10912613	10912898	+	0.933552	1.49244
TNn_00000543	chr1	10913622	10916489	+	16.7945	12.6105
TNn_00000545	chr1	10937854	10940249	+	0.980115	0.708834
TNn_00000546	chr1	10939293	10940217	-	0	0
TNn_00000547	chr1	10949628	10950070	+	0	0
TNn_00000548	chr1	10958380	10960672	-	0.214864	0.202936
TNn_00000549	chr1	10969220	10970121	-	0	0
TNn_00000550	chr1	10970207	10970566	-	0	0
TNn_00000551	chr1	10995414	10996040	+	0.122355	0.573742
TNn_00000552	chr1	11000890	11001831	-	2.80868	4.74594
TNn_00000553	chr1	11025121	11027244	+	36.3737	20.8298
TNn_00000554	chr1	11049212	11053417	-	4.11178	2.36187
TNn_00000557	chr1	11110944	11112684	+	27.5463	25.6809
TNn_00000558	chr1	11136892	11138624	+	336.663	351.587
TNn_00000560	chr1	11165944	11166198	-	39.2593	37.0597
TNn_00000561	chr1	11178217	11187033	-	21.7855	22.3551
TNn_00000562	chr1	11187061	11187717	-	4.48183	4.40719
TNn_00000563	chr1	11224593	11229667	+	4.76689	3.82922
TNn_00000564	chr1	11230280	11253027	-	32.6232	32.221
TNn_00000565	chr1	11261234	11262041	-	0	0
TNn_00000566	chr1	11313762	11314719	+	28.46	19.8304
TNn_00000567	chr1	11333018	11338812	+	30.2701	49.7102
TNn_00000568	chr1	11346137	11347042	-	22.5242	6.61012
TNn_00000569	chr1	11358348	11365654	+	0.562216	0.771614
TNn_00000570	chr1	11380665	11385146	+	0	0
TNn_00000571	chr1	11399829	11402055	-	0.221284	0.23785
TNn_00000572	chr1	11422681	11430627	-	1.09305	1.88047
TNn_00000573	chr1	11444339	11456085	-	37.4717	40.9914
TNn_00000574	chr1	11453618	11455171	+	0.036357	0.024861
TNn_00000575	chr1	11474350	11483047	-	1.75906	1.63465
TNn_00000577	chr1	11488575	11489012	-	0	0
TNn_00000578	chr1	11488915	11489300	+	0	0
TNn_00000579	chr1	11493840	11494877	-	0.597635	0.440758
TNn_00000580	chr1	11505467	11516162	-	14.2022	30.2658
TNn_00000582	chr1	11545535	11546572	+	3.55543	2.93036
TNn_00000583	chr1	11552307	11583405	-	4.92315	6.72546
TNn_00000585	chr1	11623873	11632384	+	4.13384	3.99616
TNn_00000586	chr1	11639871	11643854	+	13.2461	14.9146
TNn_00000587	chr1	11649711	11651153	-	3.6261	5.10392
TNn_00000588	chr1	11651657	11673615	+	13.4978	13.4693
TNn_00000590	chr1	11744298	11746018	+	0.784054	0.578543
TNn_00000591	chr1	11753446	11755235	+	10.1508	7.46483
TNn_00000593	chr1	11761207	11761513	-	0.235119	1.72483
TNn_00000594	chr1	11788407	11789372	-	16.9648	18.9812
TNn_00000595	chr1	11818906	11826149	-	9.16881	9.87456
TNn_00000596	chr1	11848752	11861860	+	5.86611	6.50896
TNn_00000597	chr1	11880822	12018148	+	36.989	38.8962
TNn_00000598	chr1	12019154	12022808	-	0.223335	0.515909
TNn_00000599	chr1	12051972	12052456	+	3.47897	1.98261
TNn_00000600	chr1	12072622	12080079	+	40.4623	42.3308
TNn_00000601	chr1	12086015	12089418	-	4.92115	14.2374
TNn_00000602	chr1	12110774	12121712	-	22.838	19.9466
TNn_00000603	chr1	12160804	12162400	+	0.417626	0.182282
TNn_00000604	chr1	12189120	12204783	+	6.66429	6.04421
TNn_00000605	chr1	12210664	12212937	-	4.87956	2.99677
TNn_00000606	chr1	12222228	12223354	-	0.091712	0.045106
TNn_00000608	chr1	12232317	12235523	-	36.7684	35.8827
TNn_00000609	chr1	12240909	12246254	-	0.551045	0.558611
TNn_00000610	chr1	12256762	12257037	+	0	0
TNn_00000611	chr1	12257484	12260246	+	10.4195	9.90062
TNn_00000612	chr1	12261093	12263728	-	0	0.010349
TNn_00000613	chr1	12281912	12282346	+	0	0
TNn_00000614	chr1	12289351	12290684	-	0	0
TNn_00000615	chr1	12297413	12297841	+	0	0
TNn_00000617	chr1	12311080	12313456	-	0.128883	0.094228
TNn_00000618	chr1	12317053	12369588	-	10.4374	10.8516
TNn_00000620	chr1	12394360	12399743	+	82.7106	80.4393
TNn_00000621	chr1	12407103	12407705	-	2.97255	2.27053
TNn_00000623	chr1	12429186	12429565	+	0	0
TNn_00000624	chr1	12435984	12436803	-	0	0
TNn_00000626	chr1	12452063	12452902	-	0	0
TNn_00000628	chr1	12510871	12511284	+	0	0
TNn_00000630	chr1	12533927	12534766	-	0	0
TNn_00000631	chr1	12541388	12542182	-	0	0
TNn_00000632	chr1	12599972	12607856	-	0	0.913847
TNn_00000633	chr1	12618327	12618601	-	0.151165	0.052375
TNn_00000634	chr1	12653918	12654466	-	0	0
TNn_00000635	chr1	12664847	12665386	-	0	0
TNn_00000636	chr1	12679690	12688047	+	5.29164	7.35407
TNn_00000637	chr1	12690441	12691249	+	7.12257	6.34184
TNn_00000638	chr1	12691795	12693770	-	9.25444	10.9037
TNn_00000639	chr1	12705460	12754694	+	23.8223	20.9411
TNn_00000640	chr1	12757412	12757735	+	7.34657	17.1429
TNn_00000641	chr1	12763548	12788381	-	54.2896	64.0301
TNn_00000642	chr1	12803253	12807876	+	27.2292	24.5076
TNn_00000643	chr1	12810128	12812212	-	4.75618	4.70266
TNn_00000644	chr1	12815822	12817717	-	0.759226	1.50186
TNn_00000645	chr1	12821479	12824049	-	1.14851	1.01536
TNn_00000646	chr1	12825383	12828035	-	0.224257	0.231416
TNn_00000648	chr1	12853584	12853889	+	0	0.176092
TNn_00000649	chr1	12879416	12998107	+	14.2985	18.3949
TNn_00000653	chr1	12926130	12926826	+	0.006506	0
TNn_00000654	chr1	13001392	13002576	-	6.23876	5.48122
TNn_00000656	chr1	13027132	13052076	-	4.61064	4.7501
TNn_00000659	chr1	13080420	13080755	-	0.084356	0
TNn_00000660	chr1	13085298	13091063	+	49.5747	54.7347
TNn_00000661	chr1	13096913	13123786	-	30.6605	20.3443
TNn_00000662	chr1	13146850	13153720	+	0.738553	0.726411
TNn_00000664	chr1	13181075	13182676	+	2.239	1.90535
TNn_00000665	chr1	13190847	13192163	+	0	0
TNn_00000666	chr1	13194738	13194896	+	0	0
TNn_00000668	chr1	13215705	13216329	-	0.090699	0
TNn_00000669	chr1	13227439	13227900	+	3.34437	1.35631
TNn_00000670	chr1	13243703	13246210	-	12.9824	10.209
TNn_00000671	chr1	13260225	13260791	+	86.2261	61.6164
TNn_00000672	chr1	13260830	13262514	-	3.9869	3.03701
TNn_00000673	chr1	13274677	13277021	-	5.05067	2.56497
TNn_00000675	chr1	13286884	13287127	-	0	0
TNn_00000677	chr1	13300898	13447272	+	6.25811	4.31828
TNn_00000678	chr1	13356202	13356539	-	0	0
TNn_00000679	chr1	13449678	13451516	+	11.1243	8.98941
TNn_00000681	chr1	13480973	13489380	+	126.436	88.3375
TNn_00000682	chr1	13502164	13502557	-	1.62397	0.6591
TNn_00000683	chr1	13502791	13502943	-	2.59353	1.00007
TNn_00000684	chr1	13502963	13509384	+	0.543539	0.917566
TNn_00000685	chr1	13503016	13504557	-	0.257198	0.073335
TNn_00000686	chr1	13513276	13513543	-	24.634	26.8053
TNn_00000687	chr1	13516559	13517118	-	0.051613	0
TNn_00000688	chr1	13531270	13533957	+	2.94451	2.96671
TNn_00000689	chr1	13540055	13540604	-	0.08728	0
TNn_00000690	chr1	13541340	13545811	-	9.63788	7.10245
TNn_00000691	chr1	13586657	13596604	-	0	0
TNn_00000692	chr1	13629435	13630852	+	0.674675	0.470939
TNn_00000693	chr1	13630881	13635899	+	0.71968	0.935005
TNn_00000694	chr1	13643897	13648445	+	0	0.007791
TNn_00000696	chr1	13644847	13645552	+	0	0
TNn_00000697	chr1	13655676	13667746	+	32.3583	29.1549
TNn_00000698	chr1	13671643	13675931	-	0.252757	0.112159
TNn_00000699	chr1	13680977	13682741	-	0.205677	0.143162
TNn_00000700	chr1	13707143	13707723	+	0	0
TNn_00000701	chr1	13715553	13716449	+	0.825714	0.966398
TNn_00000702	chr1	13721858	13728950	-	10.3042	10.6965
TNn_00000703	chr1	13727996	13729037	+	0	0
TNn_00000704	chr1	13752041	13771170	-	97.2387	102.603
TNn_00000706	chr1	13817518	13818044	+	0	0
TNn_00000707	chr1	13818224	13818603	+	0	0
TNn_00000708	chr1	13825881	13831980	-	2.72821	1.74389
TNn_00000709	chr1	13844079	13845057	-	11.8009	8.32927
TNn_00000710	chr1	13846683	13847196	-	19.8011	11.8047
TNn_00000711	chr1	13854277	13854609	+	0	0
TNn_00000712	chr1	13871088	13876592	+	10.8822	11.3681
TNn_00000713	chr1	13882907	13883199	-	0	0
TNn_00000714	chr1	13924490	13929182	+	1.50169	1.28346
TNn_00000715	chr1	13929403	13931930	-	6.66606	5.4589
TNn_00000716	chr1	13947968	13948479	-	0	0
TNn_00000717	chr1	13950869	13955956	+	88.8549	108.198
TNn_00000718	chr1	13951008	13951173	-	0	0
TNn_00000719	chr1	13985176	13990042	+	0	0
TNn_00000720	chr1	14006901	14008682	-	0.316501	0.552367
TNn_00000721	chr1	14041145	14045609	+	13.5176	6.46631
TNn_00000723	chr1	14077972	14088830	+	11.9337	10.2214
TNn_00000726	chr1	14106828	14114780	+	0	0
TNn_00000727	chr1	14115123	14115753	+	0.109224	0
TNn_00000728	chr1	14117545	14118636	-	2.58189	0.886493
TNn_00000730	chr1	14130912	14132374	+	1.01612	0.458358
TNn_00000731	chr1	14142381	14149395	+	94.2144	126.999
TNn_00000733	chr1	14156239	14157801	+	28.9669	22.6026
TNn_00000734	chr1	14166693	14169433	-	0.065496	0.519902
TNn_00000735	chr1	14190416	14190922	+	1.43637	0.675114
TNn_00000737	chr1	14200753	14201136	+	0.317881	0
TNn_00000740	chr1	14273580	14274832	-	1.31093	1.79644
TNn_00000743	chr1	14348132	14353771	+	6.6832	3.20236
TNn_00000744	chr1	14370807	14373824	+	2.26228	1.70872
TNn_00000745	chr1	14384504	14390001	-	65.7171	137.712
TNn_00000746	chr1	14396336	14405294	+	7.81693	8.08118
TNn_00000747	chr1	14425624	14428139	+	1.92561	1.16351
TNn_00000748	chr1	14430546	14433755	+	5.74435	4.27237
TNn_00000749	chr1	14457717	14458230	+	0	0
TNn_00000750	chr1	14458696	14503510	+	3.84303	4.39549
TNn_00000751	chr1	14506988	14510857	+	0.35836	1.37263
TNn_00000752	chr1	14514761	14515612	-	0.197384	0.954631
TNn_00000753	chr1	14516339	14531469	+	43.5398	46.8154
TNn_00000755	chr1	14533915	14535897	+	1.39406	0.974698
TNn_00000756	chr1	14549604	14557551	-	22.2738	9.68684
TNn_00000757	chr1	14572086	14582613	+	0	0.053016
TNn_00000759	chr1	14583537	14583829	-	0	0
TNn_00000760	chr1	14588043	14591452	+	0.695312	0.676367
TNn_00000761	chr1	14598702	14599253	+	0.033547	0
TNn_00000762	chr1	14612108	14612635	+	0.149233	0.240692
TNn_00000763	chr1	14630735	14634091	-	10.9186	11.0642
TNn_00000764	chr1	14638992	14639494	+	0	0
TNn_00000765	chr1	14655590	14656245	+	0.25924	0.387455
TNn_00000766	chr1	14669234	14670754	-	11.1213	17.3608
TNn_00000768	chr1	14709380	14709940	-	3.71144	2.76552
TNn_00000769	chr1	14716927	14717463	-	4.59654	2.11572
TNn_00000770	chr1	14722624	14723211	-	0.267689	0
TNn_00000771	chr1	14725896	14726372	-	3.15166	1.66676
TNn_00000772	chr1	14740562	14740984	-	0.268024	0
TNn_00000773	chr1	14750558	14750991	-	2.18302	0.914389
TNn_00000774	chr1	14762449	14768831	-	5.00315	4.21374
TNn_00000775	chr1	14833301	14908219	-	4.75334	7.0495
TNn_00000776	chr1	14906043	14906753	+	0	0
TNn_00000777	chr1	14911312	14920174	-	0.408413	0.288799
TNn_00000778	chr1	14922212	14923628	+	0.040005	0
TNn_00000779	chr1	14922727	14923595	-	0.065232	0
TNn_00000780	chr1	14952533	14957203	-	20.0181	29.4205
TNn_00000782	chr1	15100316	15188462	-	0.133556	0.158131
TNn_00000783	chr1	15065643	15066275	+	0	0
TNn_00000784	chr1	15167038	15167665	+	0	0
TNn_00000785	chr1	15209007	15210551	+	662.169	820.929
TNn_00000788	chr1	15292231	15301147	+	14.3347	13.2507
TNn_00000789	chr1	15294326	15296016	+	0.016761	0.135277
TNn_00000790	chr1	15317436	15320227	+	16.0902	15.9866
TNn_00000791	chr1	15326713	15332297	+	1.55519	3.28368
TNn_00000792	chr1	15358247	15359818	-	5.87724	6.73111
TNn_00000793	chr1	15368759	15370935	+	43.1102	56.2302
TNn_00000795	chr1	15426162	15426948	+	0	0
TNn_00000796	chr1	15431367	15431876	-	0.126342	0
TNn_00000797	chr1	15432206	15432476	+	0.030679	0.01188
TNn_00000798	chr1	15434936	15447260	+	17.4023	17.6692
TNn_00000799	chr1	15462493	15462984	+	0	0
TNn_00000801	chr1	15466947	15468268	-	0	0
TNn_00000802	chr1	15482963	15484474	-	0	0
TNn_00000803	chr1	15489926	15513209	-	11.7755	7.67273
TNn_00000804	chr1	15529482	15529937	+	0	0
TNn_00000805	chr1	15532141	15533704	-	2.71486	2.36543
TNn_00000806	chr1	15547755	15550328	+	224.273	265.052
TNn_00000807	chr1	15551563	15552908	-	0	0
TNn_00000810	chr1	15581793	15582108	-	0	0
TNn_00000811	chr1	15588217	15588552	-	0	0
TNn_00000812	chr1	15589733	15590086	+	0	0
TNn_00000813	chr1	15592284	15595282	-	377.396	418.891
TNn_00000814	chr1	15608288	15797333	-	9.34174	11.3351
TNn_00000815	chr1	15666844	15667301	-	0.091854	0
TNn_00000816	chr1	15818336	15819659	+	2.51067	2.02249
TNn_00000818	chr1	15836909	15838992	-	0.832444	0.338406
TNn_00000819	chr1	15866474	15873282	+	0	0
TNn_00000820	chr1	15875466	15875902	-	0	0.232583
TNn_00000822	chr1	15903802	15905082	-	1.1156	1.4827
TNn_00000824	chr1	15993799	15994659	-	0	0
TNn_00000825	chr1	16002550	16003268	+	0	0
TNn_00000826	chr1	16005289	16075638	+	25.7246	26.0915
TNn_00000827	chr1	16015816	16017434	+	0	0
TNn_00000828	chr1	16079806	16080516	+	0	0
TNn_00000830	chr1	16106083	16149763	+	3.26511	2.4981
TNn_00000831	chr1	16154734	16156090	+	0.634568	0.226938
TNn_00000832	chr1	16159495	16162667	+	7.51939	4.78531
TNn_00000833	chr1	16220769	16221933	-	0.456804	0.377833
TNn_00000834	chr1	16223299	16226681	+	3.7977	3.59053
TNn_00000835	chr1	16231265	16231645	-	0	0
TNn_00000836	chr1	16238490	16243905	-	29.1358	22.7056
TNn_00000837	chr1	16246613	16298770	-	82.9538	49.2911
TNn_00000839	chr1	16260190	16267655	+	0	0
TNn_00000841	chr1	16311242	16311574	+	0	0
TNn_00000843	chr1	16334529	16335327	-	0	0
TNn_00000845	chr1	16397311	16398488	-	0.045555	0.043153
TNn_00000847	chr1	16434202	16434636	+	0	0
TNn_00000849	chr1	16447460	16448473	+	24.911	18.1143
TNn_00000850	chr1	16483623	16486123	+	21.6266	31.9458
TNn_00000851	chr1	16492552	16496955	+	21.9837	10.2511
TNn_00000852	chr1	16499343	16501172	+	2.92718	2.5555
TNn_00000853	chr1	16501676	16531717	-	22.1861	14.7565
TNn_00000854	chr1	16547361	16549312	+	1.78566	0.676928
TNn_00000855	chr1	16556857	16573761	+	22.3405	13.0325
TNn_00000856	chr1	16584668	16594632	+	26.2084	24.5302
TNn_00000858	chr1	16598047	16598369	-	0	0
TNn_00000860	chr1	16627080	16627979	+	0	0.092876
TNn_00000861	chr1	16630148	16630476	-	0	0
TNn_00000864	chr1	16646479	16649544	-	0.23598	0.1658
TNn_00000865	chr1	16651958	16652613	+	0	0
TNn_00000866	chr1	16654024	16654358	+	0	0
TNn_00000867	chr1	16670124	16694176	+	31.1134	24.8686
TNn_00000868	chr1	16696411	16714606	-	16.5204	10.0798
TNn_00000869	chr1	16717511	16738322	-	30.9207	30.7598
TNn_00000870	chr1	16723734	16726304	+	0.067111	0
TNn_00000871	chr1	16726561	16726903	+	0.207136	0
TNn_00000873	chr1	16795077	16797025	-	5.63661	7.12556
TNn_00000874	chr1	16802576	16804228	+	12.8999	11.8036
TNn_00000875	chr1	16819156	16887093	+	10.1281	10.5424
TNn_00000876	chr1	16888135	16894937	-	27.1637	23.0382
TNn_00000877	chr1	16897339	16898813	-	0.613315	1.65978
TNn_00000879	chr1	16911782	16912483	-	0	0
TNn_00000880	chr1	16913894	16914399	+	0	0
TNn_00000881	chr1	16918545	16921204	-	1.26774	1.0377
TNn_00000882	chr1	16946194	16953912	-	21.6608	24.066
TNn_00000883	chr1	16958020	16958720	-	0.294891	0.180566
TNn_00000884	chr1	16994052	16995060	+	0	0.692941
TNn_00000885	chr1	16997500	16999078	+	3.70416	3.44779
TNn_00000887	chr1	17004833	17005279	+	0	0
TNn_00000888	chr1	17011219	17012517	-	0	0
TNn_00000889	chr1	17039081	17052570	+	16.1852	16.2329
TNn_00000890	chr1	17056703	17058596	-	18.608	14.5
TNn_00000891	chr1	17066979	17078601	-	2.14924	2.11107
TNn_00000892	chr1	17083638	17088283	-	1.01389	0.457375
TNn_00000893	chr1	17094753	17096447	-	141.02	126.942
TNn_00000894	chr1	17100138	17105233	-	0.074983	0
TNn_00000895	chr1	17121303	17180034	-	12.0304	8.06331
TNn_00000898	chr1	17210123	17211832	+	2.68252	2.13711
TNn_00000899	chr1	17223465	17224022	+	11.7899	13.0624
TNn_00000900	chr1	17227663	17230782	-	0	0
TNn_00000902	chr1	17269999	17276653	-	10.3839	8.29785
TNn_00000903	chr1	17280445	17282156	-	0	0
TNn_00000904	chr1	17283729	17300038	-	11.3504	13.1068
TNn_00000905	chr1	17349275	17349600	+	0	0
TNn_00000906	chr1	17368746	17370375	-	0.069555	0
TNn_00000907	chr1	17371112	17374037	+	40.8424	42.9829
TNn_00000908	chr1	17377322	17380022	-	1.1236	0.690203
TNn_00000909	chr1	17383524	17385155	-	0	0
TNn_00000910	chr1	17421297	17430300	-	0.175735	0.19379
TNn_00000911	chr1	17456587	17466626	+	81.3708	77.1783
TNn_00000913	chr1	17472615	17475381	+	0.342438	0.307155
TNn_00000914	chr1	17482359	17486410	+	0	0
TNn_00000916	chr1	17543379	17548351	+	327.791	194.754
TNn_00000917	chr1	17616549	17617112	-	0	0
TNn_00000918	chr1	17686927	17689000	-	0	0
TNn_00000919	chr1	17735316	17736095	+	0	0
TNn_00000920	chr1	17755382	17755912	+	0	0
TNn_00000922	chr1	17866630	17897144	-	20.3789	22.3455
TNn_00000923	chr1	17924050	17949711	-	7.56528	6.0853
TNn_00000924	chr1	17980435	18001907	-	6.94748	5.64774
TNn_00000925	chr1	18030230	18035126	-	2.21622	2.79714
TNn_00000926	chr1	18066132	18082305	+	50.0698	40.8228
TNn_00000927	chr1	18069719	18070587	+	0.394222	0.175492
TNn_00000928	chr1	18130525	18145623	+	0	0
TNn_00000929	chr1	18170364	18171585	-	0.113137	0
TNn_00000930	chr1	18198404	18199758	+	0	0
TNn_00000931	chr1	18203613	18204420	-	0	0
TNn_00000932	chr1	18249426	18252112	+	36.2379	41.4885
TNn_00000933	chr1	18253767	18254932	-	1.64373	1.09966
TNn_00000934	chr1	18254953	18256627	+	1.94834	1.45016
TNn_00000935	chr1	18269506	18270399	+	5.25564	9.06399
TNn_00000936	chr1	18273878	18281369	-	2.35046	2.45562
TNn_00000937	chr1	18283370	18287751	-	10.966	6.02606
TNn_00000938	chr1	18283451	18284070	+	1.31644	1.20829
TNn_00000939	chr1	18314070	18316259	+	404.951	782.566
TNn_00000940	chr1	18318841	18320774	+	0.073151	0
TNn_00000941	chr1	18320626	18328710	-	4.83778	4.86212
TNn_00000942	chr1	18329587	18371066	-	22.5757	19.7495
TNn_00000944	chr1	18406239	18409849	+	18.8062	19.0919
TNn_00000946	chr1	18479421	18494702	+	6.89948	6.39208
TNn_00000947	chr1	18502147	18503637	+	2.87127	2.5978
TNn_00000948	chr1	18508568	18509441	+	2.03096	1.44266
TNn_00000950	chr1	18542401	18542844	-	0	0
TNn_00000952	chr1	18566765	18567427	+	0	0
TNn_00000954	chr1	18572957	18573590	+	1.39236	1.30186
TNn_00000955	chr1	18576594	18577641	+	0	0
TNn_00000956	chr1	18588267	18589746	+	40.8336	39.4777
TNn_00000957	chr1	18590962	18592021	+	0.32998	0.098516
TNn_00000958	chr1	18621486	18630744	+	3.86412	4.18614
TNn_00000960	chr1	18661272	18691697	+	32.5103	32.7676
TNn_00000961	chr1	18702438	18705626	+	2.82666	4.98182
TNn_00000962	chr1	18710667	18717252	-	13.5475	18.6944
TNn_00000964	chr1	18744063	18745803	+	151.329	198.241
TNn_00000965	chr1	18763042	18764925	-	8.81001	8.25086
TNn_00000966	chr1	18811571	18812650	+	0.048289	0
TNn_00000967	chr1	18829590	18829889	+	0.232417	0
TNn_00000969	chr1	18890848	18891338	+	0	0
TNn_00000971	chr1	18965251	18965901	+	0	0
TNn_00000972	chr1	18971772	18976893	+	5.32308	7.36374
TNn_00000973	chr1	18980252	18981580	+	24.414	27.3877
TNn_00000974	chr1	19015849	19017645	-	2.7619	2.69559
TNn_00000975	chr1	19040173	19043242	+	0.073744	0
TNn_00000976	chr1	19045207	19045380	-	5.4993	6.77009
TNn_00000977	chr1	19045881	19145000	-	2.61536	3.3345
TNn_00000978	chr1	19151858	19154195	-	37.624	40.2902
TNn_00000979	chr1	19195634	19198449	+	48.7886	36.3573
TNn_00000980	chr1	19218374	19219597	+	0	0
TNn_00000981	chr1	19227325	19228628	+	0.023765	0.077966
TNn_00000982	chr1	19244006	19245300	+	0	0
TNn_00000983	chr1	19249325	19249785	-	0	0
TNn_00000984	chr1	19275261	19276742	+	0.153002	0
TNn_00000985	chr1	19290817	19292265	+	9.21866	10.7203
TNn_00000986	chr1	19292627	19293383	-	0	0
TNn_00000988	chr1	19317557	19321945	+	0	0
TNn_00000989	chr1	19348450	19348617	-	0	0
TNn_00000990	chr1	19350485	19362802	+	16.1206	17.1749
TNn_00000992	chr1	19375622	19378250	-	70.1082	97.3628
TNn_00000993	chr1	19434306	19437827	-	31.0709	32.3021
TNn_00000994	chr1	19477763	19479050	-	5.91601	6.09279
TNn_00000995	chr1	19482563	19533909	-	5.8628	4.51268
TNn_00000996	chr1	19550298	19551251	+	0	0
TNn_00000997	chr1	19554082	19556116	+	0	0
TNn_00000999	chr1	19588492	19591669	-	0.344019	0.339689
TNn_00001000	chr1	19590261	19590843	+	0.594026	0
TNn_00001001	chr1	19594585	19596505	+	0	0
TNn_00001003	chr1	19603119	19665880	+	19.8206	25.9613
TNn_00001004	chr1	19609226	19609550	-	0	0
TNn_00001005	chr1	19667415	19737077	-	6.59829	5.56627
TNn_00001006	chr1	19772797	19773099	+	2.16271	2.18771
TNn_00001007	chr1	19773107	19784849	+	1.89921	2.89616
TNn_00001008	chr1	19784306	19784627	+	5.55603	4.44772
TNn_00001009	chr1	19789516	19791819	+	3.34931	2.60664
TNn_00001010	chr1	19833439	19835356	+	0.235657	0.161071
TNn_00001012	chr1	19850907	19855599	-	0.760842	0.54253
TNn_00001014	chr1	19860643	19862121	+	1.81138	1.67362
TNn_00001015	chr1	19875681	19877044	-	0	0.055903
TNn_00001016	chr1	19880053	19880283	-	0.093829	0.669986
TNn_00001017	chr1	19881563	19884464	+	2.46752	1.75905
TNn_00001018	chr1	19886478	19937686	+	3.31377	2.14885
TNn_00001019	chr1	19939110	19939808	-	10.2694	16.7117
TNn_00001020	chr1	19942783	19962819	-	42.2245	43.7709
TNn_00001022	chr1	20002350	20003390	-	31.9274	33.181
TNn_00001024	chr1	20029493	20031789	-	0	0
TNn_00001025	chr1	20037958	20041162	+	0.032356	0
TNn_00001026	chr1	20042682	20043094	+	0	0
TNn_00001027	chr1	20044970	20045730	+	0.86155	0.950565
TNn_00001028	chr1	20045503	20045873	-	1.10527	0.50611
TNn_00001029	chr1	20047496	20050365	-	0.259733	0.193359
TNn_00001030	chr1	20069137	20073733	+	0	0
TNn_00001031	chr1	20092060	20093117	+	0.043114	8.32787
TNn_00001032	chr1	20100207	20100422	+	0.797818	0.303593
TNn_00001033	chr1	20101231	20102210	-	0	0.510535
TNn_00001034	chr1	20117965	20118859	-	10.9104	11.6789
TNn_00001035	chr1	20137639	20143303	-	15.5448	12.3824
TNn_00001036	chr1	20172362	20174474	+	17.0774	21.2366
TNn_00001037	chr1	20185250	20190429	-	4.6913	5.138
TNn_00001039	chr1	20217997	20218870	+	0	0
TNn_00001040	chr1	20221934	20222664	-	0	0
TNn_00001041	chr1	20233427	20234597	+	0	0
TNn_00001042	chr1	20244070	20244243	-	19.3941	18.2633
TNn_00001044	chr1	20298400	20301230	-	59.5813	63.5257
TNn_00001045	chr1	20356311	20357215	-	0.691102	0.620307
TNn_00001046	chr1	20361243	20361666	+	16.6229	13.9958
TNn_00001047	chr1	20363535	20365563	+	0	0
TNn_00001048	chr1	20370638	20372233	+	0	0
TNn_00001050	chr1	20396958	20397591	+	0	0
TNn_00001051	chr1	20412281	20442420	+	25.35	23.4418
TNn_00001052	chr1	20445953	20446132	-	0	0
TNn_00001053	chr1	20454167	20454568	+	0.361618	1.0375
TNn_00001054	chr1	20454244	20454846	-	0.376034	0.834604
TNn_00001055	chr1	20472626	20473054	-	0	0
TNn_00001056	chr1	20489743	20490265	+	0	0
TNn_00001057	chr1	20494671	20496396	+	9.93687	11.5031
TNn_00001058	chr1	20495661	20509459	-	0	0
TNn_00001059	chr1	20508854	20509252	+	0.092347	3.55202
TNn_00001060	chr1	20520807	20521217	-	8.8832	2.23312
TNn_00001061	chr1	20556865	20560710	+	11.3431	0.301626
TNn_00001062	chr1	20559599	20559941	-	0	0
TNn_00001063	chr1	20559700	20559828	+	0	0
TNn_00001064	chr1	20582896	20587779	+	65.0374	53.4696
TNn_00001065	chr1	20602844	20603550	+	0.608695	0.173799
TNn_00001066	chr1	20611302	20628014	-	49.1664	43.8507
TNn_00001067	chr1	20633577	20633951	+	0	0
TNn_00001068	chr1	20660456	20688690	-	11.6394	15.474
TNn_00001069	chr1	20701371	20701626	+	0	0
TNn_00001070	chr1	20701659	20703641	+	0	0
TNn_00001071	chr1	20739258	20740139	+	8.16135	7.19036
TNn_00001072	chr1	20745568	20761989	-	47.686	41.9352
TNn_00001073	chr1	20766700	20767240	+	0	0
TNn_00001074	chr1	20806236	20809412	-	6.7423	5.36275
TNn_00001075	chr1	20879944	20882161	+	61.1979	31.5646
TNn_00001076	chr1	20904621	20906297	-	4.56828	5.34056
TNn_00001078	chr1	20973882	20974759	+	0	0
TNn_00001079	chr1	20997542	20999826	+	7.09456	10.9367
TNn_00001080	chr1	21001739	21003139	+	0.344061	0.036284
TNn_00001081	chr1	21063808	21064229	-	14.8753	16.5414
TNn_00001082	chr1	21066258	21070865	+	98.6192	121.647
TNn_00001083	chr1	21106376	21111248	+	23.1694	33.0482
TNn_00001084	chr1	21137693	21138088	+	0	0
TNn_00001085	chr1	21138186	21138545	+	0	0
TNn_00001086	chr1	21146949	21148451	+	3.31448	2.86087
TNn_00001087	chr1	21148921	21149393	-	0	0
TNn_00001088	chr1	21169159	21170173	-	90.1999	135.555
TNn_00001089	chr1	21205261	21214183	-	32.3273	27.1753
TNn_00001090	chr1	21230969	21234048	-	2.48058	1.68739
TNn_00001091	chr1	21285187	21288189	+	2.49885	2.55023
TNn_00001092	chr1	21305003	21306065	+	4.94896	3.45716
TNn_00001094	chr1	21312193	21312693	+	6.63838	5.632
TNn_00001095	chr1	21315064	21316882	-	1.69998	1.10235
TNn_00001096	chr1	21315084	21316079	+	0	0
TNn_00001097	chr1	21320867	21322638	+	1.68376	3.36807
TNn_00001098	chr1	21326528	21332679	-	0.804286	0.876128
TNn_00001099	chr1	21332680	21332966	+	0.982971	0.765168
TNn_00001100	chr1	21333826	21335121	+	0	0
TNn_00001102	chr1	21348634	21351218	-	2.34082	2.07302
TNn_00001103	chr1	21361648	21363540	-	0.033424	0
TNn_00001104	chr1	21378928	21381098	+	0.974248	0.855963
TNn_00001105	chr1	21403594	21414064	+	3.88097	3.93491
TNn_00001107	chr1	21460346	21464288	+	0	0
TNn_00001108	chr1	21468912	21472915	+	0	0
TNn_00001109	chr1	21490418	21491050	-	183.292	48.373
TNn_00001111	chr1	21632560	21633174	+	0.143177	0.522944
TNn_00001112	chr1	21682637	21682918	-	0	0
TNn_00001113	chr1	21709254	21709967	-	751.863	522.01
TNn_00001114	chr1	21714746	21716378	-	1.07369	0.404577
TNn_00001116	chr1	21723645	21723928	+	0.491687	0.028639
TNn_00001117	chr1	21743312	21744344	-	0	0
TNn_00001118	chr1	21761514	21762429	+	1.18699	1.11373
TNn_00001119	chr1	21766524	21769289	+	92.1226	67.0881
TNn_00001120	chr1	21790369	21791403	+	0.912149	0.228639
TNn_00001121	chr1	21809606	21810403	+	0	0
TNn_00001123	chr1	21819563	21820739	-	0.024129	0.356602
TNn_00001125	chr1	21950907	21953395	-	1.31088	1.24624
TNn_00001127	chr1	22004943	22014575	-	6.60805	7.74068
TNn_00001128	chr1	22020756	22021081	-	0	0
TNn_00001129	chr1	22028947	22030683	+	14.5797	0.79988
TNn_00001130	chr1	22032683	22033323	-	0.130918	0
TNn_00001131	chr1	22036148	22037451	+	17.8421	23.3674
TNn_00001132	chr1	22040855	22041197	-	0	0
TNn_00001134	chr1	22075872	22076210	-	0	0
TNn_00001136	chr1	22111915	22114710	-	161.535	84.4928
TNn_00001137	chr1	22138373	22196417	+	11.4405	15.9657
TNn_00001139	chr1	22249369	22250035	+	8.74029	11.6493
TNn_00001140	chr1	22250420	22252594	+	0.493852	0.302085
TNn_00001141	chr1	22252695	22253398	+	1.4212	2.27213
TNn_00001142	chr1	22261976	22265546	+	234.073	228.685
TNn_00001144	chr1	22293442	22295262	+	24.9998	29.9037
TNn_00001146	chr1	22333429	22337997	-	199.926	267.571
TNn_00001148	chr1	22367050	22367399	-	0.655001	1.04177
TNn_00001150	chr1	22372291	22373305	+	0.464024	0.413633
TNn_00001151	chr1	22378730	22380895	-	637.759	939.047
TNn_00001153	chr1	22443904	22477798	-	18.2176	17.8917
TNn_00001154	chr1	22445985	22447383	+	0.04453	0.296937
TNn_00001157	chr1	22529404	22533258	+	9.58445	8.7593
TNn_00001158	chr1	22560832	22561150	-	0	0
TNn_00001160	chr1	22594768	22595607	+	1.14936	1.59295
TNn_00001161	chr1	22596532	22597302	-	9.41419	6.61437
TNn_00001162	chr1	22608796	22610093	-	1.64352	0.861533
TNn_00001163	chr1	22631948	22633996	-	5.82739	5.80285
TNn_00001164	chr1	22680217	22681468	+	11.4444	17.0599
TNn_00001165	chr1	22689215	22690031	+	0	0
TNn_00001166	chr1	22718174	22719924	+	0.13838	0.01382
TNn_00001167	chr1	22741203	22852965	+	1.55926	1.21282
TNn_00001170	chr1	22865350	22872611	+	13.1645	11.1458
TNn_00001171	chr1	22869306	22869591	+	0	0
TNn_00001172	chr1	22878807	22884021	+	238.509	377.127
TNn_00001173	chr1	22891547	22894088	+	0	0
TNn_00001174	chr1	22920308	22935578	+	59.2409	69.1803
TNn_00001175	chr1	22997460	23005711	+	75.2157	91.5343
TNn_00001176	chr1	23017430	23018400	-	0	0
TNn_00001178	chr1	23069970	23078136	-	11.0793	17.3455
TNn_00001179	chr1	23083967	23086428	-	1.84893	2.88577
TNn_00001180	chr1	23168354	23262242	+	16.123	20.2081
TNn_00001181	chr1	23310730	23313918	-	35.3611	35.8232
TNn_00001182	chr1	23358550	23361160	+	4.33253	4.9329
TNn_00001183	chr1	23360846	23368346	-	37.0175	39.9582
TNn_00001184	chr1	23384821	23386542	+	2.38786	2.04606
TNn_00001185	chr1	23414151	23416092	+	2.3117	1.95139
TNn_00001186	chr1	23418200	23418483	+	0.3513	0.125892
TNn_00001187	chr1	23419777	23452298	-	14.1751	11.0579
TNn_00001188	chr1	23454542	23456513	+	23.1043	30.2976
TNn_00001189	chr1	23456891	23464336	-	185.464	223.146
TNn_00001190	chr1	23503020	23503574	+	1.97945	2.8345
TNn_00001191	chr1	23507707	23510467	+	67.4384	65.5637
TNn_00001192	chr1	23518278	23521052	-	0.020428	0.253586
TNn_00001193	chr1	23522340	23523061	+	2.50086	3.08872
TNn_00001194	chr1	23532401	23532618	-	0	0
TNn_00001198	chr1	23568057	23569735	-	2.69262	2.87159
TNn_00001199	chr1	23567968	23568405	+	12.1066	13.2752
TNn_00001201	chr1	23572284	23637584	+	11.175	12.4809
TNn_00001202	chr1	23641373	23647350	-	3.58149	4.02172
TNn_00001203	chr1	23655369	23658912	+	26.5988	23.0712
TNn_00001204	chr1	23663753	23664766	-	0	0
TNn_00001205	chr1	23664790	23665946	-	0	0
TNn_00001206	chr1	23675465	23684627	+	19.3109	32.8926
TNn_00001207	chr1	23675768	23677149	-	0	0
TNn_00001208	chr1	23687941	23688396	+	0	0
TNn_00001209	chr1	23691207	23691641	+	0	0
TNn_00001210	chr1	23699078	23699876	-	0	0
TNn_00001211	chr1	23702701	23719149	-	5.08848	6.08735
TNn_00001212	chr1	23741563	23741945	+	0	0
TNn_00001213	chr1	23743860	23747909	-	11.1881	14.5735
TNn_00001215	chr1	23802127	23810954	-	0	0
TNn_00001217	chr1	23835071	23835882	+	0	0
TNn_00001218	chr1	23846216	23851163	-	0	0
TNn_00001219	chr1	23866077	23866478	-	0	0
TNn_00001222	chr1	23958355	24057798	+	9.08875	8.01039
TNn_00001223	chr1	23991082	23994975	-	0	0
TNn_00001224	chr1	24074435	24076845	+	0	0
TNn_00001226	chr1	24084198	24084736	+	0.10482	0
TNn_00001227	chr1	24100287	24147936	+	28.6835	26.8768
TNn_00001228	chr1	24148944	24150473	-	3.24722	1.80766
TNn_00001229	chr1	24180220	24180831	+	13.3968	7.22309
TNn_00001231	chr1	24222028	24250098	-	16.4749	17.9531
TNn_00001233	chr1	24241253	24241633	+	0	0
TNn_00001234	chr1	24267055	24267349	-	0	0.172319
TNn_00001235	chr1	24270740	24271407	+	0	0
TNn_00001236	chr1	24272275	24272572	+	0	0
TNn_00001237	chr1	24284163	24285852	+	0	0
TNn_00001239	chr1	24289612	24290463	+	0.066534	0.097452
TNn_00001240	chr1	24304353	24305273	-	6.46744	12.0831
TNn_00001241	chr1	24311271	24316513	-	22.5201	21.1275
TNn_00001242	chr1	24330204	24337082	-	13.7211	12.366
TNn_00001244	chr1	24345580	24347823	-	0.886467	0.695408
TNn_00001246	chr1	24378917	24380952	+	0.105486	0.10732
TNn_00001247	chr1	24380950	24384707	-	25.9419	24.1805
TNn_00001249	chr1	24446450	24454448	+	12.3669	15.0516
TNn_00001250	chr1	24457837	24461000	-	4.78903	4.79799
TNn_00001251	chr1	24472942	24482971	-	2.24257	2.37723
TNn_00001252	chr1	24488088	24488355	-	2.68629	4.90005
TNn_00001253	chr1	24519652	24537755	-	23.1253	25.5173
TNn_00001254	chr1	24545539	24547344	-	28.56	47.9981
TNn_00001255	chr1	24547923	24585561	-	19.986	20.3955
TNn_00001256	chr1	24619293	24620044	-	0	0
TNn_00001257	chr1	24624750	24625536	-	0	0
TNn_00001258	chr1	24628855	24629138	-	0	0
TNn_00001259	chr1	24640003	24641687	+	453.991	523.211
TNn_00001260	chr1	24653077	24654604	+	0	0
TNn_00001261	chr1	24665441	24666177	-	0	0
TNn_00001262	chr1	24673022	24674133	+	0	0
TNn_00001263	chr1	24675512	24676972	+	68.2546	49.7406
TNn_00001264	chr1	24709098	24710953	-	10.3685	10.2252
TNn_00001265	chr1	24729855	24752945	+	14.0562	8.89274
TNn_00001266	chr1	24732184	24732676	-	0	0
TNn_00001267	chr1	24753869	24794236	-	19.3051	23.9479
TNn_00001268	chr1	24833797	24834080	+	0.049901	0
TNn_00001270	chr1	24854221	24856696	+	410.588	151.67
TNn_00001271	chr1	24931678	25099965	+	1.16711	0.927231
TNn_00001272	chr1	25085505	25085717	+	0	0
TNn_00001273	chr1	25104998	25106184	+	0	0
TNn_00001274	chr1	25111707	25114444	+	3.63898	4.19422
TNn_00001276	chr1	25233200	25233717	+	0	0
TNn_00001277	chr1	25414502	25417398	-	2.92096	2.69299
TNn_00001278	chr1	25425871	25426707	+	0.067726	0
TNn_00001281	chr1	25501753	25503255	-	9.6407	9.83368
TNn_00001286	chr1	25749505	25757593	+	2.46334	1.23106
TNn_00001287	chr1	25772335	25775240	-	0	0
TNn_00001288	chr1	25840393	25847502	-	34.7921	26.8322
TNn_00001289	chr1	25853659	25858050	+	14.4191	13.6571
TNn_00001290	chr1	25891610	25894122	+	14.2777	9.48642
TNn_00001291	chr1	25895647	25897225	+	0.876178	0.348445
TNn_00001292	chr1	25899234	25969705	-	10.0715	15.3076
TNn_00001293	chr1	26087169	26088167	+	6.31956	4.27536
TNn_00001294	chr1	26104890	26105902	+	0	0
TNn_00001295	chr1	26111092	26116664	-	0.842193	1.08765
TNn_00001297	chr1	26124692	26124937	-	0.758132	0.889252
TNn_00001298	chr1	26154050	26154967	+	0.061751	0
TNn_00001300	chr1	26158443	26170959	-	0	0
TNn_00001302	chr1	26217027	26218409	-	0	0.069549
TNn_00001303	chr1	26241942	26322538	-	13.3093	13.7952
TNn_00001307	chr1	26342081	26342738	-	0	0
TNn_00001308	chr1	26361695	26363198	-	499.933	614.024
TNn_00001309	chr1	26415853	26417724	+	0.032288	0
TNn_00001312	chr1	26474866	26485651	-	28.2854	28.2647
TNn_00001313	chr1	26505267	26523064	+	67.3559	89.8233
TNn_00001314	chr1	26546587	26547394	-	18.2594	22.6314
TNn_00001315	chr1	26549037	26550064	+	0	0
TNn_00001316	chr1	26586491	26588963	+	2.43067	2.16442
TNn_00001317	chr1	26638118	26638447	+	0	0
TNn_00001318	chr1	26639408	26639929	+	0	0
TNn_00001319	chr1	26665141	26665474	-	0	0
TNn_00001320	chr1	26680336	26683568	+	0	0
TNn_00001321	chr1	26693098	26693373	-	0	0
TNn_00001322	chr1	26695896	26696306	-	0	0
TNn_00001323	chr1	26717904	26723870	+	3.10705	1.65152
TNn_00001324	chr1	26728100	26732061	+	0.645763	0.58714
TNn_00001325	chr1	26751774	26754446	-	0.119651	0.043062
TNn_00001326	chr1	26779840	26782348	-	1.15462	0.990092
TNn_00001328	chr1	26825118	26826706	+	0	0
TNn_00001329	chr1	26879637	26885615	+	9.90487	8.0718
TNn_00001330	chr1	26898849	26899685	+	0	0.055875
TNn_00001331	chr1	26923175	26928723	-	1.49873	1.49874
TNn_00001332	chr1	26963127	26965289	+	13.0312	12.4864
TNn_00001333	chr1	26968571	26969177	-	0	0
TNn_00001334	chr1	26974416	26975321	-	0.116377	0.232101
TNn_00001337	chr1	27016799	27021372	+	0.221602	0.255537
TNn_00001338	chr1	27022848	27024829	-	2.16336	2.1793
TNn_00001339	chr1	27030731	27033019	+	3.79895	2.67214
TNn_00001340	chr1	27038061	27038516	-	0	0
TNn_00001341	chr1	27048691	27072323	+	2.18546	1.41986
TNn_00001342	chr1	27073759	27075035	+	2.41782	1.53577
TNn_00001343	chr1	27082725	27085245	+	56.7193	52.8166
TNn_00001344	chr1	27097623	27098430	-	0	0
TNn_00001345	chr1	27099259	27099477	-	0	0.267711
TNn_00001346	chr1	27103447	27106175	-	31.6483	48.2332
TNn_00001347	chr1	27152050	27154551	-	12.5753	13.6713
TNn_00001349	chr1	27186704	27190544	-	31.9871	35.1851
TNn_00001350	chr1	27201916	27202419	+	0.056237	0
TNn_00001351	chr1	27243886	27244502	-	0	0
TNn_00001352	chr1	27265611	27266283	-	0	0
TNn_00001353	chr1	27266521	27266843	-	0	0
TNn_00001354	chr1	27277467	27284543	-	1.26871	0.916024
TNn_00001355	chr1	27279162	27280131	-	0.447068	0.142021
TNn_00001357	chr1	27322238	27324669	+	1.94124	0.487091
TNn_00001358	chr1	27413460	27415633	-	12.1156	9.94016
TNn_00001359	chr1	27432171	27432526	-	0	0
TNn_00001361	chr1	27452823	27546321	-	2.32821	2.57998
TNn_00001362	chr1	27571877	27572250	+	0	0
TNn_00001363	chr1	27574481	27584154	+	0	0
TNn_00001364	chr1	27623395	27623739	-	0.675315	0.045677
TNn_00001366	chr1	27641715	27642679	+	0	0
TNn_00001367	chr1	27670078	27673516	+	18.2144	14.3745
TNn_00001368	chr1	27675059	27675913	+	23.0483	15.7082
TNn_00001369	chr1	27676561	27676926	-	0	0.070372
TNn_00001370	chr1	27677061	27677276	-	0.369166	0
TNn_00001371	chr1	27678257	27693001	-	24.3562	29.4876
TNn_00001372	chr1	27697674	27698919	+	0	0
TNn_00001374	chr1	27723415	27724884	+	0.533254	0.447496
TNn_00001375	chr1	27725502	27728482	-	8.18662	13.0995
TNn_00001376	chr1	27749774	27750312	-	0	0
TNn_00001377	chr1	27763761	27764091	+	2.15728	1.24097
TNn_00001378	chr1	27766306	27782882	+	14.5704	14.0719
TNn_00001379	chr1	27786673	27789638	-	1.27559	1.21801
TNn_00001380	chr1	27807832	27813437	-	11.0543	14.0984
TNn_00001381	chr1	27849787	27850476	-	0.324787	0.04887
TNn_00001382	chr1	27890711	27891203	-	0	0
TNn_00001383	chr1	27908565	27908846	-	0	0
TNn_00001384	chr1	27988527	27989237	-	19.3924	22.7536
TNn_00001385	chr1	28014394	28020008	+	0	0
TNn_00001386	chr1	28034627	28062597	+	14.1416	13.6232
TNn_00001388	chr1	28132527	28134730	+	2.44686	2.68616
TNn_00001389	chr1	28135124	28137975	-	17.7494	3.61598
TNn_00001390	chr1	28139546	28191768	-	19.4582	25.2537
TNn_00001392	chr1	28214200	28216926	-	13.2512	12.609
TNn_00001394	chr1	28226658	28227913	-	0.067779	0.08075
TNn_00001395	chr1	28258472	28260154	+	9.77793	9.90515
TNn_00001396	chr1	28275392	28276254	-	1.23599	1.51815
TNn_00001397	chr1	28276665	28276806	-	0	0
TNn_00001398	chr1	28296533	28298341	+	38.4213	31.9712
TNn_00001399	chr1	28317073	28318182	+	0	0
TNn_00001401	chr1	28339934	28340468	-	0	0
TNn_00001402	chr1	28340674	28340892	+	0	0
TNn_00001404	chr1	28354509	28356152	+	0	0.042671
TNn_00001405	chr1	28400214	28402547	+	16.6794	9.60392
TNn_00001406	chr1	28404687	28443768	-	2.70675	2.47465
TNn_00001407	chr1	28444154	28444425	+	0.10065	0.564408
TNn_00001408	chr1	28445598	28468680	-	0.420924	0.398638
TNn_00001409	chr1	28482416	28496677	+	37.1909	44.8918
TNn_00001410	chr1	28498595	28500849	-	1.9505	1.35919
TNn_00001411	chr1	28549564	28550132	+	0	0
TNn_00001412	chr1	28561041	28561373	+	0	0
TNn_00001413	chr1	28587716	28590529	-	11.4886	7.49198
TNn_00001414	chr1	28626522	28630554	-	2.82998	1.89174
TNn_00001415	chr1	28656490	28661519	+	0.301342	0.051227
TNn_00001416	chr1	28674046	28687529	-	14.5716	10.8639
TNn_00001417	chr1	28690544	28691343	+	0.280173	0.054634
TNn_00001418	chr1	28690874	28691336	-	2.10477	1.77984
TNn_00001419	chr1	28693680	28694348	+	2.02797	1.87481
TNn_00001420	chr1	28719387	28723177	-	0	0
TNn_00001421	chr1	28728346	28755818	-	13.1506	14.7185
TNn_00001422	chr1	28765869	28779924	+	44.1598	46.0019
TNn_00001423	chr1	28783433	28791296	+	3.75888	1.74905
TNn_00001424	chr1	28793008	28794751	+	0.032056	0
TNn_00001425	chr1	28795178	28797951	+	0.081918	0.127759
TNn_00001429	chr1	28894570	28894867	-	0	0.16831
TNn_00001431	chr1	28922845	28925343	+	0	0
TNn_00001433	chr1	28984319	28989604	+	57.5913	56.5238
TNn_00001434	chr1	29019221	29032329	+	36.2401	24.8995
TNn_00001435	chr1	29035751	29038279	-	1.29453	1.10821
TNn_00001436	chr1	29049036	29055001	+	0.783769	0.633874
TNn_00001437	chr1	29063029	29063935	-	0	0
TNn_00001438	chr1	29080153	29081409	-	8.24845	9.30553
TNn_00001439	chr1	29081114	29081333	+	2.20564	1.51732
TNn_00001440	chr1	29083732	29087057	-	1.12356	0.740455
TNn_00001441	chr1	29099089	29099412	+	0	0
TNn_00001442	chr1	29104935	29120048	+	27.1725	20.8462
TNn_00001443	chr1	29129338	29129868	+	0	0
TNn_00001444	chr1	29159778	29161447	-	0.871441	11.0793
TNn_00001445	chr1	29206256	29206512	-	6.43115	6.04932
TNn_00001448	chr1	29310501	29311038	+	9.97344	9.96881
TNn_00001449	chr1	29314398	29317758	-	7.40475	9.00937
TNn_00001450	chr1	29330399	29331822	+	0.368299	0.243902
TNn_00001451	chr1	29332480	29335223	+	1.30766	1.43275
TNn_00001452	chr1	29335933	29338527	-	8.43833	7.23464
TNn_00001453	chr1	29347071	29347427	-	0	0
TNn_00001454	chr1	29361717	29363689	-	0.657853	0.759033
TNn_00001455	chr1	29387213	29393855	-	2.51396	2.17634
TNn_00001456	chr1	29417744	29418427	+	2.43406	0.297275
TNn_00001457	chr1	29425198	29428251	+	80.2727	67.8277
TNn_00001458	chr1	29429079	29429316	-	1.33079	0.291302
TNn_00001459	chr1	29429092	29430274	+	42.9198	41.8086
TNn_00001460	chr1	29431763	29435734	-	1.26978	1.27281
TNn_00001461	chr1	29458376	29458639	-	4.07832	1.89152
TNn_00001462	chr1	29499236	29512708	+	0.053919	0.064469
TNn_00001463	chr1	29526774	29539748	+	8.97927	7.95219
TNn_00001465	chr1	29579564	29580813	-	0.02962	0
TNn_00001466	chr1	29585214	29586969	-	7.95066	6.05992
TNn_00001467	chr1	29606615	29621283	-	10.6801	14.9244
TNn_00001468	chr1	29630276	29669198	-	13.5344	12.801
TNn_00001469	chr1	29681042	29681445	+	77.6497	68.483
TNn_00001470	chr1	29697376	29717992	+	69.002	76.3808
TNn_00001471	chr1	29739235	29741645	+	75.9094	66.2713
TNn_00001472	chr1	29744338	29751301	-	26.6628	19.1001
TNn_00001473	chr1	29783888	29784331	-	0.55026	0
TNn_00001476	chr1	29832217	29859105	-	0.565553	0.752716
TNn_00001477	chr1	29859116	29860176	-	1.25421	0
TNn_00001479	chr1	29914972	29916875	+	0.057842	0.134505
TNn_00001480	chr1	29926097	29926420	-	0	0
TNn_00001482	chr1	29953536	29955923	+	0.237225	0.085149
TNn_00001484	chr1	29979094	29981924	-	0	0
TNn_00001485	chr1	30006360	30006647	-	0	0
TNn_00001486	chr1	30009120	30022163	+	25.7152	16.5122
TNn_00001487	chr1	30028063	30029559	+	0.189336	0.319425
TNn_00001488	chr1	30032079	30034108	-	2.83035	1.97786
TNn_00001489	chr1	30049156	30049868	-	0	0
TNn_00001490	chr1	30050295	30050834	+	0	0
TNn_00001491	chr1	30082234	30082525	+	0	0
TNn_00001492	chr1	30116931	30118274	+	0.056174	0
TNn_00001493	chr1	30135923	30140675	+	0.507493	0.956641
TNn_00001497	chr1	30186671	30200038	+	13.9747	15.421
TNn_00001498	chr1	30285597	30290458	+	2.12403	2.17043
TNn_00001499	chr1	30228652	30228972	+	0	0
TNn_00001500	chr1	30229326	30229984	+	0	0.017228
TNn_00001501	chr1	30237021	30239710	+	0.863803	0.467885
TNn_00001502	chr1	30249965	30253751	-	14.1742	14.4775
TNn_00001503	chr1	30264991	30266460	-	0.077125	0
TNn_00001504	chr1	30284459	30285430	+	0.071888	0.222018
TNn_00001505	chr1	30285597	30286403	-	1.03993	0.881739
TNn_00001506	chr1	30287618	30289038	-	0.212852	0.236466
TNn_00001508	chr1	30311627	30316121	-	47.9186	57.0423
TNn_00001509	chr1	30342724	30347449	+	12.2016	9.18082
TNn_00001510	chr1	30367137	30367518	-	0	0
TNn_00001511	chr1	30374320	30375842	+	0.144554	0.235708
TNn_00001512	chr1	30400834	30402729	-	0.145704	0.400202
TNn_00001514	chr1	30410912	30411199	+	0	0
TNn_00001515	chr1	30417511	30419219	-	0.083571	0
TNn_00001517	chr1	30461393	30465188	+	2.58754	1.38117
TNn_00001518	chr1	30467799	30468169	-	0	0
TNn_00001519	chr1	30490507	30492862	-	0	0
TNn_00001521	chr1	30530093	30534790	+	5.84468	3.97417
TNn_00001522	chr1	30556693	30559637	+	6.91127	6.16638
TNn_00001523	chr1	30573375	30585380	-	27.8528	28.7983
TNn_00001525	chr1	30622543	30623143	-	0.030183	0.084583
TNn_00001526	chr1	30627626	30630386	+	268.948	231.039
TNn_00001527	chr1	30630887	30646702	-	17.0455	12.1134
TNn_00001528	chr1	30631372	30631900	-	0	0
TNn_00001530	chr1	30665131	30665473	-	0	0
TNn_00001531	chr1	30671230	30671756	-	0	0
TNn_00001532	chr1	30675681	30676181	-	0	0
TNn_00001533	chr1	30680248	30681204	+	0	0
TNn_00001534	chr1	30699724	30702720	-	1.85842	3.03291
TNn_00001535	chr1	30723893	30730137	+	0	0
TNn_00001536	chr1	30723944	30724238	-	0	0
TNn_00001537	chr1	30736371	30748946	+	2.1365	1.45659
TNn_00001539	chr1	30775778	30779233	+	1.08092	1.65436
TNn_00001540	chr1	30780373	30784597	+	36.0646	40.4463
TNn_00001541	chr1	30794295	30811645	-	6.30238	7.86689
TNn_00001542	chr1	30836148	30837690	+	0	0
TNn_00001543	chr1	30854620	30857173	+	0	0
TNn_00001544	chr1	30871014	30874860	-	0.823672	0.262051
TNn_00001546	chr1	30887881	30995906	-	11.3037	12.2347
TNn_00001548	chr1	30978490	30978632	+	0	0
TNn_00001549	chr1	31016480	31037160	+	19.3656	18.654
TNn_00001550	chr1	31039407	31041511	-	43.3277	7.17765
TNn_00001552	chr1	31093759	31098034	-	4.05218	4.01179
TNn_00001553	chr1	31141780	31143631	-	3.02009	3.05524
TNn_00001554	chr1	31203756	31209789	+	0	0
TNn_00001555	chr1	31218033	31222576	+	4.09548	3.25091
TNn_00001556	chr1	31227973	31229322	+	1.13514	0.743814
TNn_00001557	chr1	31229487	31230615	-	3.93847	5.27597
TNn_00001558	chr1	31242231	31243182	-	0	0
TNn_00001559	chr1	31246388	31371934	-	22.0336	25.2725
TNn_00001560	chr1	31347655	31349770	+	0.009287	0
TNn_00001561	chr1	31369702	31370533	+	0	0.122197
TNn_00001562	chr1	31378980	31384287	-	0.909415	1.2742
TNn_00001563	chr1	31384249	31384758	+	0	0.139974
TNn_00001564	chr1	31385648	31386556	+	0.76655	0.593889
TNn_00001565	chr1	31399792	31409165	+	15.2749	13.4564
TNn_00001566	chr1	31420968	31423658	+	6.41913	6.07955
TNn_00001567	chr1	31441321	31443414	-	2.40469	1.96608
TNn_00001568	chr1	31445384	31446312	+	7.84494	1.52497
TNn_00001569	chr1	31449917	31451473	-	0.472938	0.55492
TNn_00001570	chr1	31476276	31486196	+	14.7842	13.7759
TNn_00001571	chr1	31520149	31520898	-	0	0
TNn_00001572	chr1	31537845	31540973	+	5.26619	6.461
TNn_00001573	chr1	31543690	31577263	+	14.4954	17.1559
TNn_00001574	chr1	31581063	31581991	-	229.523	489.702
TNn_00001575	chr1	31592384	31607531	+	16.3708	10.3739
TNn_00001576	chr1	31612260	31619779	-	19.2188	20.2608
TNn_00001577	chr1	31633921	31635795	-	0.328661	0.067996
TNn_00001579	chr1	31676053	31676454	-	0.289292	0
TNn_00001580	chr1	31676635	31677160	-	0	0
TNn_00001581	chr1	31746882	31751905	+	29.9176	25.0465
TNn_00001582	chr1	31761327	31762376	-	9.95812	5.23965
TNn_00001583	chr1	31764242	31764613	-	0	0
TNn_00001584	chr1	31765265	31771564	-	0	0
TNn_00001585	chr1	31781134	31781534	+	0	0
TNn_00001586	chr1	31796913	31797312	+	0.125184	0.110988
TNn_00001587	chr1	31801133	31803181	+	1.54785	1.33686
TNn_00001588	chr1	31809576	31811620	+	2.78655	3.76595
TNn_00001589	chr1	31836180	31838226	+	1.1815	1.00371
TNn_00001590	chr1	31844614	31846660	+	2.58155	3.43314
TNn_00001591	chr1	31848810	31884903	-	18.0918	18.0879
TNn_00001592	chr1	31872168	31872763	-	0	0
TNn_00001593	chr1	31905643	31906755	-	0.205761	0.184516
TNn_00001595	chr1	31924405	31924575	+	0.055251	0
TNn_00001596	chr1	31933408	31945027	-	9.99942	7.1204
TNn_00001597	chr1	31946382	31947378	+	3.22042	1.50667
TNn_00001598	chr1	31956240	31963520	-	1.53099	1.28362
TNn_00001600	chr1	31982671	31989701	-	0.636384	0.867346
TNn_00001601	chr1	31999092	31999262	+	0.055251	0
TNn_00001602	chr1	32008097	32019708	-	8.70342	5.37606
TNn_00001603	chr1	32021065	32022057	+	6.49989	3.0422
TNn_00001604	chr1	32030930	32038221	-	1.7189	0.913675
TNn_00001607	chr1	32070311	32070519	+	0.024411	0.101344
TNn_00001608	chr1	32074789	32076437	+	0	0
TNn_00001610	chr1	32138999	32149842	+	9.10953	9.20736
TNn_00001611	chr1	32155125	32155850	+	0.078081	0.274476
TNn_00001612	chr1	32181987	32183403	+	23.3641	12.6801
TNn_00001614	chr1	32240168	32253326	-	14.5122	20.3126
TNn_00001615	chr1	32297221	32299351	+	184.538	133.067
TNn_00001616	chr1	32302391	32303319	+	0.122039	0
TNn_00001617	chr1	32304209	32304658	-	0	0
TNn_00001618	chr1	32321544	32327959	+	13.7547	17.4803
TNn_00001619	chr1	32343174	32346573	+	16.4504	13.5321
TNn_00001621	chr1	32362842	32373940	-	22.7681	23.0613
TNn_00001622	chr1	32388348	32388725	-	0	0
TNn_00001623	chr1	32409601	32426463	+	11.6663	18.9613
TNn_00001624	chr1	32446328	32449680	-	352.08	199.032
TNn_00001625	chr1	32462123	32464629	-	4.6566	3.37138
TNn_00001626	chr1	32472311	32477424	-	6.92818	4.4265
TNn_00001629	chr1	32510081	32516056	-	40.6126	37.863
TNn_00001630	chr1	32524404	32524832	-	0	0
TNn_00001632	chr1	32539956	32540582	-	0	0
TNn_00001633	chr1	32547427	32549673	-	1.22149	0.996799
TNn_00001634	chr1	32557517	32563778	+	20.8586	26.0459
TNn_00001635	chr1	32559992	32560948	+	2.26946	2.21503
TNn_00001638	chr1	32578262	32613987	-	43.8635	32.7026
TNn_00001640	chr1	32616866	32617371	-	0.623515	0.599807
TNn_00001641	chr1	32647143	32647537	-	0.14399	0
TNn_00001642	chr1	32653777	32657592	+	114.777	163.376
TNn_00001643	chr1	32671139	32694338	+	7.59946	7.18815
TNn_00001644	chr1	32702625	32706381	+	0.949562	0.59895
TNn_00001645	chr1	32746385	32752065	-	14.6708	14.0267
TNn_00001646	chr1	32770752	32792599	-	8.81955	8.97195
TNn_00001648	chr1	32817789	32818067	+	0	0.765852
TNn_00001649	chr1	32865878	32888456	-	24.9441	19.0268
TNn_00001650	chr1	32884795	32885847	-	0.053834	0
TNn_00001651	chr1	32888941	32889715	-	0.06071	0.131185
TNn_00001652	chr1	32927098	32928772	-	20.1351	15.7612
TNn_00001653	chr1	32930546	32930740	+	5.38188	2.28493
TNn_00001654	chr1	32934878	32935328	-	0	0
TNn_00001656	chr1	32999445	33004836	-	0.556856	0.239306
TNn_00001657	chr1	33007988	33008326	-	1.38401	0.239925
TNn_00001658	chr1	33008529	33011056	-	265.557	94.6536
TNn_00001659	chr1	33038818	33040496	+	0.033762	0.090829
TNn_00001660	chr1	33040504	33042412	-	5.49497	6.95312
TNn_00001661	chr1	33078645	33080054	-	0	0
TNn_00001662	chr1	33095185	33097050	+	18.3371	11.902
TNn_00001663	chr1	33113207	33115238	-	0.829336	0.589079
TNn_00001664	chr1	33118718	33119619	-	0	0
TNn_00001666	chr1	33149606	33153190	-	0.150563	0.060617
TNn_00001667	chr1	33170166	33173226	-	3.8734	6.00976
TNn_00001668	chr1	33192392	33193137	-	0.38208	0.109151
TNn_00001670	chr1	33249187	33250162	+	0.057113	0.104168
TNn_00001671	chr1	33260334	33263610	+	13.1202	16.5344
TNn_00001672	chr1	33280867	33281638	-	0	0
TNn_00001674	chr1	33312682	33313783	+	3.63411	2.0901
TNn_00001675	chr1	33314432	33320075	+	12.066	13.0685
TNn_00001676	chr1	33421589	33422798	+	2.92604	1.6968
TNn_00001677	chr1	33423448	33429189	+	7.45258	6.92664
TNn_00001678	chr1	33434742	33436179	+	1.08356	0.853133
TNn_00001680	chr1	33434256	33435783	-	0.149616	0.16608
TNn_00001682	chr1	33456404	33456725	+	0	0
TNn_00001683	chr1	33467418	33472674	-	3.35711	9.20016
TNn_00001684	chr1	33484805	33487808	+	0	0.017064
TNn_00001685	chr1	33485595	33486008	-	0	0
TNn_00001686	chr1	33486864	33487894	-	0.10109	0
TNn_00001687	chr1	33496339	33496659	+	0	0
TNn_00001688	chr1	33502074	33505724	+	27.0589	26.9412
TNn_00001689	chr1	33518899	33521151	+	0	0
TNn_00001690	chr1	33522014	33522173	-	0	0
TNn_00001691	chr1	33524795	33525608	-	0	0
TNn_00001693	chr1	33530435	33530961	-	0	0
TNn_00001694	chr1	33532474	33532829	+	8.35179	8.12299
TNn_00001695	chr1	33540476	33546803	-	2.5976	2.67377
TNn_00001697	chr1	33566345	33569762	-	0	0
TNn_00001698	chr1	33625134	33632000	-	23.5414	20.9577
TNn_00001699	chr1	33633849	33672917	-	8.21053	6.92783
TNn_00001700	chr1	33660042	33660633	-	0	0
TNn_00001702	chr1	33706668	33717328	-	52.2209	38.3581
TNn_00001704	chr1	33780757	33781926	+	0.00533	0
TNn_00001705	chr1	33780890	33781439	-	0	0
TNn_00001706	chr1	33792517	33793352	-	4.61478	1.68629
TNn_00001708	chr1	33817825	33818988	-	39.889	32.1671
TNn_00001709	chr1	33825964	33827530	+	0.551012	0.101469
TNn_00001710	chr1	33828391	33829395	+	9.41926	12.2221
TNn_00001712	chr1	33866102	33874599	-	4.64919	5.5751
TNn_00001714	chr1	33875481	33875707	+	2.33834	2.26649
TNn_00001715	chr1	33883004	33883544	-	0.013272	0.332317
TNn_00001716	chr1	33883987	33886712	-	3.71752	15.9215
TNn_00001718	chr1	34011152	34020179	-	0.584511	0.454587
TNn_00001719	chr1	34028705	34029776	-	43.2909	34.7626
TNn_00001720	chr1	34033751	34055041	+	0.094636	0
TNn_00001721	chr1	34040646	34043648	-	10.7471	14.4941
TNn_00001722	chr1	34049618	34067907	-	59.6778	72.6548
TNn_00001723	chr1	34076337	34095810	-	6.18697	8.4874
TNn_00001724	chr1	34096910	34098039	-	0	0
TNn_00001726	chr1	34127869	34130297	+	2.26891	69.0348
TNn_00001727	chr1	34142983	34145642	-	637.731	1060.72
TNn_00001729	chr1	34202140	34218453	-	20.4299	13.7292
TNn_00001730	chr1	34227257	34255708	-	12.4328	20.1904
TNn_00001731	chr1	34271694	34279707	+	19.3185	17.6352
TNn_00001732	chr1	34281579	34283364	-	138.497	160.639
TNn_00001733	chr1	34293213	34293657	-	0	0
TNn_00001737	chr1	34311977	34312327	-	10.3487	7.10916
TNn_00001738	chr1	34313989	34331176	+	26.9666	20.9668
TNn_00001742	chr1	34370750	34371067	+	0	0
TNn_00001743	chr1	34378357	34404670	-	16.2277	19.708
TNn_00001744	chr1	34425518	34428069	-	0	0
TNn_00001745	chr1	34434038	34445544	-	5.69636	6.38071
TNn_00001746	chr1	34446405	34447285	-	0.286331	0.171755
TNn_00001747	chr1	34459301	34460672	-	0.163891	0.33136
TNn_00001748	chr1	34471151	34471696	+	44.2741	71.6934
TNn_00001749	chr1	34483947	34484501	-	89.1218	27.4648
TNn_00001750	chr1	34497398	34500012	-	0	0
TNn_00001751	chr1	34523451	34525426	-	17.2025	21.8285
TNn_00001752	chr1	34529015	34529350	-	0	0
TNn_00001753	chr1	34533963	34607413	+	1.82492	2.33269
TNn_00001754	chr1	34610457	34615029	-	30.43	29.9408
TNn_00001755	chr1	34616717	34616875	+	0	0
TNn_00001756	chr1	34623926	34655257	+	28.8652	37.8389
TNn_00001757	chr1	34631968	34632340	+	0	0
TNn_00001759	chr1	34639441	34641363	+	0.036033	0.016594
TNn_00001761	chr1	34670579	34673065	-	1.66152	2.13284
TNn_00001762	chr1	34685788	34687987	+	6.2695	5.53822
TNn_00001765	chr1	34728897	34744581	-	66.701	82.4679
TNn_00001766	chr1	34752110	34753526	+	22.6781	21.6406
TNn_00001767	chr1	34782204	34861201	+	30.7219	30.4006
TNn_00001768	chr1	34872950	34898240	+	16.2709	13.4982
TNn_00001769	chr1	34903800	34905123	+	0.64827	0.389239
TNn_00001770	chr1	34935175	34937863	-	12.4566	11.8953
TNn_00001771	chr1	34941795	34964062	-	5.06905	3.31476
TNn_00001772	chr1	34948634	34960282	+	0	0
TNn_00001775	chr1	34978140	34989929	+	14.5783	13.9432
TNn_00001777	chr1	35018270	35024709	+	0	0
TNn_00001778	chr1	35044374	35061423	+	31.7347	33.7632
TNn_00001779	chr1	35056777	35058054	-	0	0
TNn_00001780	chr1	35064950	35065505	+	0.105351	0.363048
TNn_00001782	chr1	35069958	35079431	+	6.6524	6.11979
TNn_00001783	chr1	35078477	35079450	-	16.5182	13.993
TNn_00001784	chr1	35096967	35097390	-	0	0
TNn_00001785	chr1	35111192	35143666	+	4.47604	5.41184
TNn_00001786	chr1	35143668	35144419	-	0.081937	0
TNn_00001787	chr1	35169331	35180273	+	0.842804	0.483671
TNn_00001788	chr1	35216914	35222795	-	1.3592	1.13229
TNn_00001789	chr1	35219961	35220619	+	0.595993	1.32375
TNn_00001790	chr1	35220231	35220619	-	1.32194	1.37
TNn_00001791	chr1	35236779	35237219	+	0	0.101822
TNn_00001792	chr1	35239207	35239700	-	0	0
TNn_00001794	chr1	35306657	35307193	+	0.402721	0.230978
TNn_00001795	chr1	35314831	35315466	+	0.044565	0
TNn_00001796	chr1	35337761	35338426	+	0.170231	0.076073
TNn_00001797	chr1	35360134	35362551	-	5.74787	6.60649
TNn_00001798	chr1	35415364	35415981	+	29.3813	11.9811
TNn_00001799	chr1	35420448	35421872	+	0.323547	0.234967
TNn_00001800	chr1	35426962	35428820	-	179.829	195.135
TNn_00001801	chr1	35427638	35428647	+	0	0
TNn_00001802	chr1	35441141	35441614	+	0	0
TNn_00001805	chr1	35463185	35502559	-	15.5923	14.4089
TNn_00001808	chr1	35531050	35538490	-	3.58903	3.7645
TNn_00001809	chr1	35560197	35578797	+	61.0776	77.0861
TNn_00001810	chr1	35579322	35593597	-	12.911	4.39652
TNn_00001811	chr1	35596808	35597198	+	0	0
TNn_00001812	chr1	35632491	35635321	+	3.52203	2.65333
TNn_00001813	chr1	35635594	35635665	+	0	0
TNn_00001814	chr1	35641910	35642084	+	1.31622	0.14524
TNn_00001815	chr1	35658472	35658986	-	1.77053	0.589321
TNn_00001816	chr1	35666239	35666522	-	0	0
TNn_00001817	chr1	35669030	35670054	+	3.91945	4.70467
TNn_00001818	chr1	35675967	35676423	+	0	0
TNn_00001819	chr1	35701727	35702124	+	0	0
TNn_00001822	chr1	35748840	35749601	-	1.67664	1.7602
TNn_00001823	chr1	35758718	35766913	-	10.8017	12.4554
TNn_00001824	chr1	35769601	35771011	-	2.64124	2.18107
TNn_00001825	chr1	35775607	35776006	+	0.91822	0.243595
TNn_00001826	chr1	35775695	35776268	-	1.87389	1.29686
TNn_00001827	chr1	35780936	35791183	+	0.782821	0.642285
TNn_00001828	chr1	35805108	35807241	+	108.278	81.217
TNn_00001829	chr1	35820267	35827892	+	26.6871	17.4806
TNn_00001830	chr1	35855988	35873934	+	18.9353	20.7121
TNn_00001832	chr1	35892698	35893745	-	0.036962	0
TNn_00001833	chr1	35902858	35903287	+	18.2701	11.8797
TNn_00001835	chr1	35958173	35973327	+	40.1583	41.1602
TNn_00001836	chr1	35979250	35981547	+	0.034108	0.15293
TNn_00001837	chr1	35999186	36029139	-	5.36183	6.3607
TNn_00001838	chr1	36039229	36119787	+	37.9138	53.8374
TNn_00001842	chr1	36122851	36125479	-	32.0636	31.4045
TNn_00001845	chr1	36171586	36172155	-	14.6738	8.97063
TNn_00001846	chr1	36188395	36188963	-	8.54042	9.11376
TNn_00001847	chr1	36193502	36194618	-	1.82779	1.21104
TNn_00001848	chr1	36223612	36224039	-	0	0
TNn_00001849	chr1	36227594	36232165	+	1.14308	1.30275
TNn_00001851	chr1	36280802	36282735	-	10.3425	12.8627
TNn_00001852	chr1	36302501	36302809	-	0	0
TNn_00001854	chr1	36311732	36312946	-	6.64693	3.91541
TNn_00001855	chr1	36317478	36319071	+	0.035942	0
TNn_00001857	chr1	36383660	36385958	+	3.62626	1.96357
TNn_00001858	chr1	36393992	36396180	+	0	0
TNn_00001859	chr1	36436965	36448043	+	18.1107	12.801
TNn_00001861	chr1	36450038	36450474	-	0.738027	1.11614
TNn_00001862	chr1	36458138	36459053	+	0.076796	0
TNn_00001863	chr1	36460870	36463900	-	254.61	212.312
TNn_00001864	chr1	36464592	36466632	-	1.55739	1.94935
TNn_00001865	chr1	36469037	36475520	-	5.22949	5.6455
TNn_00001866	chr1	36500569	36503871	+	49.5954	56.9972
TNn_00001867	chr1	36505358	36514407	-	6.57359	4.03221
TNn_00001868	chr1	36568931	36592610	+	17.5325	17.142
TNn_00001869	chr1	36597928	36609544	-	15.618	14.5065
TNn_00001870	chr1	36618224	36618785	+	0	0
TNn_00001871	chr1	36650207	36652142	+	0	0.053341
TNn_00001873	chr1	36657732	36664811	+	28.375	31.3316
TNn_00001874	chr1	36672837	36673431	+	0	0
TNn_00001875	chr1	36687120	36689535	+	10.6142	14.1287
TNn_00001876	chr1	36701083	36709657	-	5.41059	9.1028
TNn_00001877	chr1	36725252	36725737	+	0	0
TNn_00001878	chr1	36726955	36727846	+	0	0
TNn_00001879	chr1	36753785	36754989	+	3.85508	4.89916
TNn_00001880	chr1	36775518	36784705	+	207.862	152.931
TNn_00001881	chr1	36796374	36796643	-	0.941285	0.448093
TNn_00001882	chr1	36806000	36807019	+	3.07111	2.30681
TNn_00001885	chr1	36866943	36867570	-	0.095335	0
TNn_00001887	chr1	36883195	36884125	-	0	0
TNn_00001888	chr1	36888154	36905860	+	3.89547	5.39712
TNn_00001889	chr1	36909129	36911041	-	88.4291	66.5198
TNn_00001890	chr1	36918324	36947787	-	4.77796	4.07571
TNn_00001891	chr1	36965667	36966224	+	0.101251	0.273302
TNn_00001893	chr1	36973059	36973436	-	35.7338	18.8248
TNn_00001894	chr1	36974194	36975747	-	0.478681	0.25877
TNn_00001895	chr1	36985194	36985454	-	0	0.162305
TNn_00001896	chr1	37024648	37030025	-	4.94618	3.76276
TNn_00001897	chr1	37030723	37031066	-	0	0
TNn_00001898	chr1	37056571	37057501	+	0.060888	0
TNn_00001899	chr1	37063961	37066994	+	0.72763	0.843869
TNn_00001900	chr1	37069969	37073975	-	1.06252	1.23437
TNn_00001901	chr1	37070252	37070410	+	0	0
TNn_00001903	chr1	37104185	37112027	-	20.8596	16.2635
TNn_00001904	chr1	37132003	37144345	+	16.3919	14.8172
TNn_00001905	chr1	37173434	37175567	-	7.5198	8.12153
TNn_00001906	chr1	37219607	37221311	-	0	0
TNn_00001907	chr1	37259510	37263539	+	13.2245	9.56307
TNn_00001908	chr1	37278949	37279538	-	0	0
TNn_00001909	chr1	37286397	37286798	+	0.282025	0
TNn_00001910	chr1	37317902	37321053	+	7.34151	5.20113
TNn_00001911	chr1	37328369	37334092	+	4.82594	4.01088
TNn_00001912	chr1	37341967	37343767	-	0	0
TNn_00001913	chr1	37344925	37351332	+	0.088712	0.099507
TNn_00001914	chr1	37358625	37359808	-	0	0.084636
TNn_00001915	chr1	37359516	37361544	+	7.62655	8.51185
TNn_00001916	chr1	37413234	37414583	+	11.4973	15.6144
TNn_00001917	chr1	37439294	37440293	+	0	0
TNn_00001918	chr1	37440949	37441760	+	0	0
TNn_00001919	chr1	37445390	37453527	+	9.36893	9.70941
TNn_00001920	chr1	37471614	37473472	-	0.350217	0.094046
TNn_00001921	chr1	37495315	37496368	+	0	0
TNn_00001922	chr1	37498276	37499650	-	0.973332	1.83286
TNn_00001924	chr1	37563535	37565952	+	0.075282	0.235242
TNn_00001925	chr1	37569727	37600927	-	1.91576	3.01609
TNn_00001926	chr1	37569849	37571102	-	1.12907	0.687382
TNn_00001927	chr1	37617885	37620232	-	30.4417	48.5029
TNn_00001928	chr1	37639023	37641186	-	1.35682	0.850239
TNn_00001929	chr1	37646555	37650022	+	0.618588	0.49442
TNn_00001930	chr1	37649962	37663265	-	7.87976	6.55445
TNn_00001931	chr1	37657259	37657979	+	0	0
TNn_00001932	chr1	37675477	37677693	-	0.972812	0.985882
TNn_00001933	chr1	37682996	37686471	+	0.982012	0.354263
TNn_00001934	chr1	37686413	37713250	-	7.03619	5.96607
TNn_00001935	chr1	37707228	37707948	+	0	0
TNn_00001936	chr1	37754027	37754368	+	0	0
TNn_00001937	chr1	37758091	37758663	-	36.3479	32.5629
TNn_00001938	chr1	37772911	37773622	+	0.079617	0
TNn_00001939	chr1	37776350	37779196	+	3.78093	2.90935
TNn_00001941	chr1	37795867	37795941	+	0	0
TNn_00001942	chr1	37820424	37863979	+	29.3715	28.0223
TNn_00001944	chr1	37866531	37866969	-	8.79489	10.234
TNn_00001946	chr1	37874393	37874911	+	0	0
TNn_00001947	chr1	37877848	37878935	-	17.7786	15.5108
TNn_00001948	chr1	37881474	37882195	-	0.691969	0.606911
TNn_00001949	chr1	37893739	37894056	+	0	0
TNn_00001950	chr1	37925542	37926254	+	0	0
TNn_00001951	chr1	37941939	37946124	+	0.113351	0.128937
TNn_00001952	chr1	37963185	37965266	-	1.96836	1.4505
TNn_00001953	chr1	37995583	38039651	+	8.42255	7.25946
TNn_00001954	chr1	38043464	38044435	-	17.1607	20.0324
TNn_00001955	chr1	38124516	38127648	-	2.4161	1.87816
TNn_00001956	chr1	38145676	38149592	+	0	0
TNn_00001957	chr1	38168581	38170207	-	0.649716	0.575412
TNn_00001959	chr1	38255891	38259820	+	0	0
TNn_00001960	chr1	38278894	38280520	-	0.297159	0.286404
TNn_00001962	chr1	38288197	38288562	-	0	0
TNn_00001963	chr1	38295264	38325787	-	33.403	35.3419
TNn_00001964	chr1	38346461	38352774	-	1.96231	1.36785
TNn_00001966	chr1	38376041	38406939	+	29.9846	41.814
TNn_00001967	chr1	38400615	38400986	-	0	0
TNn_00001968	chr1	38407174	38407567	-	3.2703	2.43677
TNn_00001969	chr1	38416930	38443712	+	10.6209	6.81005
TNn_00001971	chr1	38445105	38445831	-	0	0
TNn_00001973	chr1	38460778	38462378	+	1.00498	0.518591
TNn_00001974	chr1	38466791	38480423	-	16.7318	16.382
TNn_00001975	chr1	38488024	38500769	-	13.5626	11.3267
TNn_00001977	chr1	38530705	38551074	+	11.8391	9.00408
TNn_00001978	chr1	38553377	38554968	+	1.47764	2.01203
TNn_00001979	chr1	38598879	38612331	+	14.7998	15.6377
TNn_00001980	chr1	38616325	38618051	-	0	0.021978
TNn_00001981	chr1	38624407	38624715	-	0.539353	0.082256
TNn_00001982	chr1	38634744	38639894	+	0.711706	0.524279
TNn_00001983	chr1	38643614	38647196	+	0	0
TNn_00001984	chr1	38651415	38656366	-	38.6338	34.5994
TNn_00001985	chr1	38679056	38698515	-	10.6039	9.03103
TNn_00001986	chr1	38740808	38742150	+	0.335142	0.196574
TNn_00001987	chr1	38789450	38812804	+	71.9528	65.3164
TNn_00001988	chr1	38815084	38817448	+	0.388153	0.41566
TNn_00001989	chr1	38840565	38859074	+	25.032	25.9003
TNn_00001991	chr1	38863855	38869181	-	31.6258	75.8582
TNn_00001992	chr1	38902318	38939061	-	13.2404	6.89818
TNn_00001994	chr1	38989317	39004174	+	91.0229	96.93
TNn_00001995	chr1	39005350	39017049	-	20.0094	24.4399
TNn_00001997	chr1	39151920	39154027	-	0	0
TNn_00001998	chr1	39155421	39156547	+	0	0
TNn_00001999	chr1	39175722	39178854	+	5.12928	4.08121
TNn_00002000	chr1	39198883	39200067	+	0.193471	0.173495
TNn_00002001	chr1	39224954	39225690	+	0.461182	0.21173
TNn_00002002	chr1	39239222	39252141	+	21.2118	19.0681
TNn_00002003	chr1	39255695	39258807	-	0	0
TNn_00002005	chr1	39305750	39329363	-	25.5067	32.0379
TNn_00002006	chr1	39329450	39345911	-	39.1282	45.5892
TNn_00002007	chr1	39330749	39338021	+	9.1626	9.6768
TNn_00002009	chr1	39358915	39371659	+	29.7147	35.9704
TNn_00002010	chr1	39372731	39373057	-	0	0
TNn_00002011	chr1	39380503	39381085	+	0	0
TNn_00002012	chr1	39400892	39401924	-	0	0
TNn_00002014	chr1	39438268	39448240	+	23.0237	23.1178
TNn_00002015	chr1	39460820	39461101	-	0.694182	0.620705
TNn_00002016	chr1	39467440	39469562	+	0	0.25838
TNn_00002017	chr1	39473556	39475434	+	6.17142	8.52231
TNn_00002018	chr1	39496743	39533494	+	4.03923	4.46786
TNn_00002020	chr1	39543683	39553520	-	5.35362	5.08908
TNn_00002021	chr1	39555624	39555942	-	0	0
TNn_00002024	chr1	39577928	39579181	-	4.69313	4.33887
TNn_00002026	chr1	39636410	39668250	+	73.9777	63.1056
TNn_00002027	chr1	39639304	39640190	+	0	0
TNn_00002028	chr1	39669512	39671985	+	15.4162	19.4751
TNn_00002029	chr1	39685284	39686996	-	31.3344	26.6442
TNn_00002030	chr1	39700044	39709647	-	36.7584	39.8691
TNn_00002031	chr1	39715177	39721745	-	0	0
TNn_00002033	chr1	39727150	39727602	-	0.355389	0.163836
TNn_00002035	chr1	39741930	39742049	-	0	0
TNn_00002036	chr1	39746483	39750507	-	0	0.099925
TNn_00002037	chr1	39767596	39769651	-	14.1422	14.6939
TNn_00002038	chr1	39772493	39781567	-	27.5703	22.1699
TNn_00002039	chr1	39800552	39888459	-	0.016368	0
TNn_00002040	chr1	39898268	39924278	-	11.1394	7.2734
TNn_00002043	chr1	39929411	39931229	-	1.42397	1.91865
TNn_00002044	chr1	39941205	39943306	-	0.055685	0.013854
TNn_00002045	chr1	39945247	39949757	-	6.96677	5.64923
TNn_00002046	chr1	39971977	39995021	-	7.12902	6.61584
TNn_00002047	chr1	39993409	39994183	-	0.292578	0
TNn_00002048	chr1	40022675	40036702	+	7.78475	8.00085
TNn_00002049	chr1	40040141	40040583	+	0	0
TNn_00002050	chr1	40045155	40057991	-	35.6339	40.3731
TNn_00002051	chr1	40054903	40056378	+	0	0
TNn_00002052	chr1	40064972	40067338	-	37.7006	43.6003
TNn_00002053	chr1	40091736	40115971	-	54.0212	57.079
TNn_00002054	chr1	40126281	40146585	+	77.4895	95.2006
TNn_00002055	chr1	40149852	40151733	+	2.02945	1.23771
TNn_00002056	chr1	40152076	40163256	-	80.145	21.8151
TNn_00002058	chr1	40201297	40203005	+	135.179	172.292
TNn_00002059	chr1	40219016	40227706	-	20.7127	25.3685
TNn_00002061	chr1	40242711	40244711	+	3.88754	3.38987
TNn_00002062	chr1	40251070	40252707	-	32.7757	46.8854
TNn_00002063	chr1	40261533	40262830	+	3.40501	3.02107
TNn_00002064	chr1	40266045	40299653	-	16.4236	20.0863
TNn_00002065	chr1	40280158	40281124	-	0	0
TNn_00002066	chr1	40322955	40336695	-	64.8816	72.9918
TNn_00002068	chr1	40389982	40391269	+	0.114163	0.229327
TNn_00002070	chr1	40393378	40393561	+	0	0.064924
TNn_00002072	chr1	40396998	40397434	-	0	0
TNn_00002073	chr1	40399812	40400093	+	0	0
TNn_00002075	chr1	40462371	40464554	-	10.2302	15.8869
TNn_00002076	chr1	40472293	40472808	-	109.06	122.436
TNn_00002077	chr1	40483155	40483474	-	0	0
TNn_00002078	chr1	40507130	40509831	+	20.1597	28.2655
TNn_00002079	chr1	40511548	40513702	-	150.472	243.394
TNn_00002080	chr1	40533725	40537714	-	0	0.02902
TNn_00002081	chr1	40561551	40562587	-	0.775897	0.364291
TNn_00002082	chr1	40564604	40572100	+	8.4324	6.54033
TNn_00002083	chr1	40573090	40573539	+	193.513	82.8856
TNn_00002084	chr1	40574107	40574562	-	0	0.309166
TNn_00002085	chr1	40593570	40615650	+	5.1295	6.19647
TNn_00002086	chr1	40617533	40618759	+	0.483872	0.126663
TNn_00002087	chr1	40651840	40652504	+	0	0
TNn_00002088	chr1	40657185	40665093	+	5.52423	6.7378
TNn_00002089	chr1	40686084	40697844	+	21.2443	19.2988
TNn_00002090	chr1	40706392	40754220	+	32.1135	29.5293
TNn_00002091	chr1	40756442	40758736	-	1.90431	1.07073
TNn_00002092	chr1	40782370	40785018	+	12.821	20.5171
TNn_00002093	chr1	40791068	40793827	+	16.8823	18.6701
TNn_00002096	chr1	40822982	40823971	-	36.9632	32.6166
TNn_00002097	chr1	40827413	40830557	-	0.534499	0.465484
TNn_00002098	chr1	40876478	40893286	+	17.3047	20.2667
TNn_00002099	chr1	40894837	40988578	-	13.0745	14.7619
TNn_00002103	chr1	40980901	40981966	-	0	0
TNn_00002104	chr1	41015116	41016393	+	1.97617	1.37949
TNn_00002105	chr1	41023317	41104556	+	0.05851	0.065479
TNn_00002106	chr1	41024938	41027298	-	1.1439	0.749851
TNn_00002107	chr1	41038681	41041410	+	0	0
TNn_00002108	chr1	41063265	41063853	-	0	0
TNn_00002109	chr1	41067570	41070327	-	0	0
TNn_00002111	chr1	41085949	41086107	-	0.053478	0
TNn_00002112	chr1	41094473	41095671	+	1.18869	1.16644
TNn_00002113	chr1	41105093	41107337	-	1.67858	2.7729
TNn_00002114	chr1	41105250	41107298	+	0	0
TNn_00002115	chr1	41120503	41123225	+	0	0
TNn_00002116	chr1	41146203	41146802	-	0	0
TNn_00002117	chr1	41150485	41153244	-	0	0
TNn_00002119	chr1	41183700	41186272	+	0	0
TNn_00002120	chr1	41195363	41210127	+	13.2763	10.7022
TNn_00002121	chr1	41229967	41230528	+	0	0
TNn_00002122	chr1	41231654	41233097	-	13.6833	8.93048
TNn_00002124	chr1	41253674	41255888	-	0.570775	0.052515
TNn_00002125	chr1	41261548	41261924	+	0.023557	0
TNn_00002126	chr1	41263700	41263864	+	0	0
TNn_00002127	chr1	41267876	41268273	-	0	0
TNn_00002129	chr1	41294222	41446238	+	3.28031	2.89426
TNn_00002130	chr1	41449108	41450336	-	0.541963	0.919481
TNn_00002131	chr1	41451858	41452165	+	0.515355	0.864334
TNn_00002132	chr1	41452282	41487220	-	10.0831	9.52464
TNn_00002134	chr1	41524053	41525522	+	6.86611	5.11317
TNn_00002135	chr1	41533563	41541407	+	0.548137	0.680739
TNn_00002137	chr1	41563338	41563626	-	0	0
TNn_00002138	chr1	41563802	41564371	-	0	0
TNn_00002139	chr1	41564563	41565150	-	0	0
TNn_00002140	chr1	41577990	41584393	-	0.020282	0
TNn_00002141	chr1	41590208	41608567	+	0.129128	0.057898
TNn_00002142	chr1	41615909	41617936	-	2.14924	1.68703
TNn_00002143	chr1	41620251	41624304	-	6.08553	6.91541
TNn_00002144	chr1	41670252	41739031	-	16.0124	15.1941
TNn_00002146	chr1	41812681	41817388	+	3.82814	5.16257
TNn_00002147	chr1	41817390	41818366	-	1.40219	2.94928
TNn_00002149	chr1	41845853	41846046	-	0	0
TNn_00002150	chr1	41851515	41853175	+	2.91219	1.67102
TNn_00002151	chr1	41862461	41865101	-	117.634	63.3332
TNn_00002152	chr1	41890751	41894500	+	0	0
TNn_00002154	chr1	41898863	41899402	+	0	0
TNn_00002155	chr1	41947142	41947725	-	0.273258	0.145966
TNn_00002156	chr1	41953955	41963211	-	0.935435	0.204632
TNn_00002157	chr1	41971550	42012781	+	4.02227	2.63472
TNn_00002158	chr1	42035669	42040524	-	0.03825	0.153097
TNn_00002159	chr1	42066712	42076826	-	0	0.05119
TNn_00002161	chr1	42135942	42136552	-	0.035537	0.218534
TNn_00002162	chr1	42150134	42151007	-	0	0
TNn_00002163	chr1	42151755	42153720	-	0.40221	0.2631
TNn_00002164	chr1	42186376	42241781	+	13.8199	14.6718
TNn_00002166	chr1	42251896	42255019	+	0.360445	0.835377
TNn_00002167	chr1	42275691	42276351	+	0.08576	0
TNn_00002168	chr1	42278446	42294891	-	23.6366	19.6999
TNn_00002169	chr1	42306439	42314871	+	43.2175	35.4883
TNn_00002170	chr1	42314625	42316496	-	1.93552	1.09715
TNn_00002173	chr1	42361757	42373516	-	6.16537	3.93148
TNn_00002174	chr1	42375314	42375862	+	0	0
TNn_00002175	chr1	42385790	42426504	+	8.09696	6.36038
TNn_00002177	chr1	42462413	42465806	+	4.64051	3.23312
TNn_00002178	chr1	42489672	42490055	-	0	0
TNn_00002179	chr1	42493553	42494103	-	56.7092	40.6041
TNn_00002180	chr1	42535401	42536804	+	0	0.009052
TNn_00002181	chr1	42587685	42588914	-	0.218914	0.257477
TNn_00002182	chr1	42590384	42590691	+	0.515355	0.864334
TNn_00002183	chr1	42616516	42617309	-	0	0
TNn_00002184	chr1	42620507	42621054	-	135.145	94.4519
TNn_00002185	chr1	42633593	42633934	+	0	0
TNn_00002186	chr1	42668140	42669544	+	0	0.027136
TNn_00002187	chr1	42686032	42687932	+	28.8207	23.495
TNn_00002188	chr1	42702010	42741802	+	9.90493	13.059
TNn_00002191	chr1	42746016	42752780	-	2.76953	3.77212
TNn_00002192	chr1	42756760	42760696	-	4.68283	6.83838
TNn_00002193	chr1	42764244	42766059	+	0.115394	0.126753
TNn_00002195	chr1	42771307	42774499	-	0.08859	0.113195
TNn_00002196	chr1	42775291	42777092	+	0.371063	0.385168
TNn_00002197	chr1	42787309	42793119	+	78.2473	82.5216
TNn_00002199	chr1	42862903	42876928	+	109.453	72.5102
TNn_00002201	chr1	42880781	42882120	+	31.3825	23.8756
TNn_00002202	chr1	42890195	42890756	+	0	0
TNn_00002203	chr1	42906158	42915587	+	11.3015	10.545
TNn_00002205	chr1	42908244	42910675	+	1.50908	1.23154
TNn_00002206	chr1	42915914	42919034	-	0.63758	0.643146
TNn_00002207	chr1	42929693	42931464	-	42.4035	40.1615
TNn_00002208	chr1	42949882	42950383	-	0	0
TNn_00002209	chr1	42961431	42961726	-	0.040217	0
TNn_00002210	chr1	42975174	42977958	+	42.6384	35.9281
TNn_00002211	chr1	42988465	42992483	-	0.040205	0.066657
TNn_00002214	chr1	43035979	43037137	+	0	0
TNn_00002215	chr1	43050914	43051923	-	0	0
TNn_00002216	chr1	43057004	43058092	+	0	0
TNn_00002218	chr1	43108141	43112149	-	1.53724	2.19104
TNn_00002219	chr1	43130677	43131631	-	1.51603	2.48311
TNn_00002222	chr1	43171867	43174496	-	0.086432	0
TNn_00002223	chr1	43174502	43175532	+	0.151301	0
TNn_00002224	chr1	43210008	43228763	+	18.5708	12.7469
TNn_00002225	chr1	43234172	43240270	-	3.17251	2.97409
TNn_00002226	chr1	43247910	43256868	+	2.28131	2.12383
TNn_00002227	chr1	43271813	43273463	+	2.88799	1.35515
TNn_00002228	chr1	43274925	43277480	+	3.12119	2.36584
TNn_00002229	chr1	43305240	43307630	-	41.7929	29.9324
TNn_00002230	chr1	43315752	43333210	+	20.9701	17.6671
TNn_00002231	chr1	43338181	43339414	+	1.03025	0.315513
TNn_00002232	chr1	43338491	43338827	-	0	0
TNn_00002234	chr1	43358178	43359177	-	0	0
TNn_00002237	chr1	43388355	43393557	+	10.5204	15.5772
TNn_00002238	chr1	43403239	43406399	-	8.69237	4.89349
TNn_00002241	chr1	43427225	43427612	+	0	0
TNn_00002242	chr1	43431152	43440524	+	16.245	13.5024
TNn_00002243	chr1	43443253	43469228	-	14.6329	13.249
TNn_00002244	chr1	43555580	43555704	-	0	0
TNn_00002245	chr1	43555822	43555944	-	0	0.055105
TNn_00002246	chr1	43560752	43561077	+	0	0
TNn_00002247	chr1	43564343	43574947	+	57.2006	19.0285
TNn_00002248	chr1	43575760	43577960	-	0.283195	0.29216
TNn_00002249	chr1	43591367	43591674	-	0	0
TNn_00002250	chr1	43595062	43614782	-	29.6821	28.8954
TNn_00002252	chr1	43615786	43618113	-	0.731964	1.04398
TNn_00002253	chr1	43640979	43641266	-	0	0
TNn_00002254	chr1	43648866	43649708	-	0	0
TNn_00002255	chr1	43676261	43678560	-	0	0
TNn_00002256	chr1	43691770	43692819	+	1.48034	0.661489
TNn_00002257	chr1	43720857	43721295	-	0	0
TNn_00002259	chr1	43731994	43736556	+	62.4218	73.0813
TNn_00002260	chr1	43740146	43740888	+	0.534064	0.342087
TNn_00002261	chr1	43744034	43745123	+	0	0.140945
TNn_00002262	chr1	43750925	43753988	-	1.35436	1.10699
TNn_00002263	chr1	43758126	43758443	+	0	0
TNn_00002265	chr1	43761992	43769665	+	28.6598	23.0913
TNn_00002266	chr1	43772909	43866491	-	5.2223	3.23036
TNn_00002267	chr1	43837794	43838498	-	0.321093	0.036053
TNn_00002268	chr1	43873996	43888923	-	9.46355	6.57998
TNn_00002269	chr1	43920470	43920904	-	112.519	42.7201
TNn_00002270	chr1	43938093	43939382	-	3.08879	2.78773
TNn_00002271	chr1	43952686	43954947	-	3.39947	2.94163
TNn_00002272	chr1	43956069	43969984	+	9.48892	11.2798
TNn_00002273	chr1	43969981	43971256	-	9.61624	6.95629
TNn_00002274	chr1	43971622	43975301	-	365.655	419.192
TNn_00002275	chr1	43981099	43981891	-	0	0
TNn_00002276	chr1	43990407	43991180	-	0	0
TNn_00002279	chr1	44049092	44051691	-	8.53944	4.81419
TNn_00002280	chr1	44098462	44103883	-	9.88459	12.0294
TNn_00002281	chr1	44120265	44120662	+	0	0
TNn_00002282	chr1	44140217	44145727	+	11.3562	13.5308
TNn_00002283	chr1	44148200	44162534	-	26.5769	39.212
TNn_00002284	chr1	44195648	44199469	+	2.59374	4.07016
TNn_00002286	chr1	44219586	44224327	+	9.57165	6.79335
TNn_00002287	chr1	44234727	44238146	-	124.089	112.138
TNn_00002288	chr1	44243142	44244873	+	0.404643	0.08805
TNn_00002289	chr1	44259673	44260418	-	0	0
TNn_00002290	chr1	44267987	44270158	-	6.16162	5.44631
TNn_00002291	chr1	44297285	44315662	+	12.9211	14.0706
TNn_00002293	chr1	44350655	44392793	-	0.165746	0.076994
TNn_00002297	chr1	44407832	44408371	-	0	0
TNn_00002298	chr1	44415125	44416087	-	1.06742	0.223114
TNn_00002299	chr1	44442149	44446491	-	2.38614	1.24929
TNn_00002302	chr1	44461425	44461712	+	0	0
TNn_00002303	chr1	44468778	44469218	+	0	0
TNn_00002304	chr1	44470223	44474844	+	0.045399	0
TNn_00002305	chr1	44522830	44527169	-	2.34293	1.15197
TNn_00002308	chr1	44553751	44554041	+	0	0
TNn_00002309	chr1	44609363	44610781	+	30.9008	30.7015
TNn_00002310	chr1	44610749	44611169	-	9.06005	10.6607
TNn_00002311	chr1	44613679	44614954	-	0.088851	0.039839
TNn_00002313	chr1	44667856	44672740	-	6.84203	6.1993
TNn_00002314	chr1	44703917	44704366	+	0	0
TNn_00002315	chr1	44723450	44724442	-	0.057087	0
TNn_00002316	chr1	44756461	44756535	+	0	0
TNn_00002317	chr1	44757120	44757186	+	0	0
TNn_00002318	chr1	44763075	44807308	+	2.26076	2.8067
TNn_00002319	chr1	44818910	44820807	+	48.3014	32.9857
TNn_00002320	chr1	44822168	44827002	-	0.99075	0.383781
TNn_00002321	chr1	44851898	44852231	-	0	0
TNn_00002322	chr1	44854894	44863012	+	3.11204	3.05063
TNn_00002323	chr1	44891089	44891535	+	3.74321	2.28697
TNn_00002324	chr1	44895026	44903166	+	30.2469	33.2775
TNn_00002326	chr1	44959753	44962739	+	74.965	56.1225
TNn_00002327	chr1	45011364	45013531	-	7.16838	11.5297
TNn_00002328	chr1	45020596	45029252	-	4.36964	2.63876
TNn_00002330	chr1	45055702	45055995	+	0	0
TNn_00002331	chr1	45088559	45090137	+	0.3314	0.393752
TNn_00002332	chr1	45095708	45097300	+	1.44497	0.134637
TNn_00002333	chr1	45118259	45118750	-	0	0
TNn_00002334	chr1	45133411	45134715	+	0.730633	1.08005
TNn_00002335	chr1	45138511	45141109	+	0	0
TNn_00002336	chr1	45149178	45151244	+	18.2151	11.4294
TNn_00002337	chr1	45154830	45156906	-	0	0.04895
TNn_00002339	chr1	45200560	45201366	+	8.11757	7.26627
TNn_00002340	chr1	45209248	45287204	-	10.087	9.35068
TNn_00002341	chr1	45243358	45244164	+	8.03554	6.85767
TNn_00002343	chr1	45288575	45298445	+	18.461	16.8264
TNn_00002344	chr1	45326266	45327390	+	8.64986	7.99594
TNn_00002345	chr1	45337735	45344400	+	1.15473	0.988335
TNn_00002346	chr1	45351874	45352619	+	0	0
TNn_00002347	chr1	45353796	45365786	+	21.7687	23.759
TNn_00002348	chr1	45367331	45367795	-	3.72137	4.20678
TNn_00002349	chr1	45375406	45377000	+	1.97285	0.092957
TNn_00002350	chr1	45382398	45384093	+	11.0087	8.56124
TNn_00002352	chr1	45386240	45386651	+	0	0
TNn_00002354	chr1	45422535	45424154	-	0	0
TNn_00002356	chr1	45430529	45432681	-	0	0
TNn_00002358	chr1	45441232	45441717	-	0	0
TNn_00002359	chr1	45496837	45497301	-	5.85041	6.54327
TNn_00002360	chr1	45504839	45506436	+	1.29621	0.177294
[truncated: 34,410 more rows]

## Sheet: Sheet5
Table S5. Genomic Loci and gene expression in the American lotus genome.
[truncated: 40,216 more rows]

[truncated: 1 more sheets: Sheet6]
